# Supplementary material
Source: Research Square preprint supplement (doi:10.21203/rs.3.rs-8899582/v1)
Supplement: Supplementary file 1 [file 3e3d6148e8f7f898dee3d53d.docx]

**Table 1.** Results of linear mixed-effects models testing the effects of plant species richness, soil history, and plant history on fungal alpha diversity. The table shows df (degree of freedom), F-values and p-values from linear mixed-effects models for fungal richness (observed OTUs) measured in bulk soil, rhizosphere, and root compartments. Fixed effects include plant species richness (log₂-transformed: logSR), soil history (SH, with history vs. without soil history), and plant history (PH, with plant history vs. without plant history), and their two-way and three-way interactions. Models included block and unit as nested random effects. Significant (p < 0.05) results are italicized and highlighted in bold.

|  |  | **Bulk soil** | | **Rhizosphere** | | **Root** | |
| --- | --- | --- | --- | --- | --- | --- | --- |
| **Observed OTUs (Richness)** | df | F-value | p-value | F-value | p-value | F-value | p-value |
| Intercept | 1, 66 | 63063.15 | < 0.0001 | 33113.61 | **<** 0 .0001 | 5819.355 | < 0.0001 |
| logSR | 1, 17 | ***10.64*** | ***0.005*** | ***12.28*** | ***0.003*** | ***8.76*** | ***0.009*** |
| SH | 1, 66 | ***35.02*** | ***< 0.0001*** | ***34.65*** | ***< 0 .0001*** | ***42.763*** | ***< 0.0001*** |
| PH | 1, 66 | 0.09 | 0.766 | 3.87 | 0.0534 | 0.215 | 0.6442 |
| SH:PH | 1, 66 | 0.2 | 0.6525 | 4.13 | ***0.046*** | 0.642 | 0.426 |
| logSR:SH | 1, 66 | 0.05 | 0.8277 | 0.22 | 0.6376 | ***6.446*** | ***0.013*** |
| logSR:PH | 1, 66 | 0.03 | 0.8697 | ***10.26*** | ***0.002*** | 0.373 | 0.5432 |
| logSR:SH:PH | 1, 66 | 0.13 | 0.72 | 0.44 | 0.5106 | 0.058 | 0.8105 |

**Table 2.** Summary of the compartments PERMANOVA testing how plant species richness (SR), soil history (SH), plant history (PH), and their two-way species richness: soil history (SR:SH), species richness: plant history (SR:PH), soil history: plant history (SH:PH) and three-way species richness: soil history: plant history (SR:SH:PH) interactions affect fungal beta-diversity (Aitchison distance) across different compartments-bulk soil, rhizosphere, and root. The table includes df (degrees of freedom), SS (sum of squares), R² (variance explained), F statistics, and p-values for each fixed effect and interaction term in the model. Significant (p < 0.05) results are italicized and highlighted in bold.

| **Compartment** | **Term** | **df** | **SS** | **R2** | **F-value** | **p-value** |
| --- | --- | --- | --- | --- | --- | --- |
| **Bulk soil** | SR | 1,17 | 1,112 | 0.014 | 0.9 | 0.142 |
|  | SH | 1,66 | 14,670 | 0.178 | 22.8 | ***< 0.001*** |
|  | PH | 1,66 | 544 | 0.007 | 0.85 | 0.606 |
|  | SR:SH | 1,66 | 1,155 | ***0.014*** | ***1.8*** | ***0.06*** |
|  | SR:PH | 1,66 | 519 | 0.006 | 0.81 | 0.612 |
|  | SH:PH | 1,66 | 575 | 0.007 | 0.89 | 0.479 |
|  | SR:SH:PH | 1,66 | 490 | 0.006 | 0.76 | 0.695 |
| **Rhizosphere** | SR | 1,17 | 1,227 | 0.015 | 1.0 | ***0.029*** |
|  | SH | 1,66 | 14,731 | 0.181 | 23.5 | ***< 0.001*** |
|  | PH | 1,66 | 598 | 0.008 | 0.95 | 0.390 |
|  | SR:SH | 1,66 | 1,111 | ***0.013*** | ***1.77*** | ***0.06*** |
|  | SR:PH | 1,66 | 626 | 0.008 | 1.00 | 0.340 |
|  | SH:PH | 1,66 | 624 | 0.008 | 1.00 | 0.353 |
|  | SR:SH:PH | 1,66 | 477 | 0.006 | 0.76 | 0.689 |
| **Root** | SR | 1,17 | 1,897 | 0.024 | 1.1 | 0.125 |
|  | SH | 1,66 | 8,341 | 0.104 | 14.5 | ***< 0.001*** |
|  | PH | 1,66 | 709 | 0.0098 | 1.23 | 0.218 |
|  | SR:SH | 1,66 | 1,020 | ***0.013*** | ***1.77*** | ***0.048*** |
|  | SR:PH | 1,66 | 477 | 0.006 | 0.83 | 0.700 |
|  | SH:PH | 1,66 | 772 | 0.010 | 1.31 | 0.105 |
|  | SR:SH:PH | 1,66 | 431 | 0.005 | 0.75 | 0.863 |

**Table 3**. Results of the linear-mixed model effects for the relationship between plant species richness (SR), soil history (SH), plant history (PH), and the relative (%) abundance of fungal functional guilds in bulk soil (BS), rhizosphere (RS) and root (RO). The table shows numerator degrees of freedom (numDF), denominator degrees of freedom (den DF), F-value, and p-values. Fixed effects include plant species richness (log₂-transformed: logSR), soil history (SH, with vs. without), and plant history (PH, with vs. without), and their two-way and three-way interactions. Models included block and unit as nested random effects. Significant (p < 0.05) results are italicized and highlighted in bold.

|  | | **Bulk soil** | | **Rhizosphere** | | **Root** | |
| --- | --- | --- | --- | --- | --- | --- | --- |
|  | **df** | **F-value** | **p-value** | **F-value** | **p-value** | **F-value** | **p-value** |
| **Saprotroph (%)** | | | | | | | |
| Intercept | 1,66 | 2478.39 | <0.0001 | 1644.69 | <0.0001 | 246.80 | <0.0001 |
| logSR | 1,17 | 1.29 | 0.27 | 0.008 | 0.92 | 0.034 | 0.85 |
| SH | 1,66 | 43.34 | <0.0001 | 47.57 | <0.0001 | 2.72 | 0.10 |
| PH | 1,66 | 0.19 | 0.66 | 0.66 | 0.41 | 0.58 | 0.44 |
| SH:PH | 1,66 | 0.074 | 0.78 | 0.43 | 0.51 | 0.27 | 0.60 |
| logSR:SH | 1,66 | 11.47 | 0.0012 | 3.23 | 0.07 | 0.177 | 0.67 |
| logSR:PH | 1,66 | 0.64 | 0.42 | 0.48 | 0.48 | 0.34 | 0.56 |
| logSR:SH:PH | 1,66 | 0.29 | 0.58 | < 0.0001 | 0.98 | 0.63 | 0.42 |
| **Pathotroph (%)** | | | | | | | |
| Intercept | 1,66 | 189.86 | <0.0001 | 133.65 | <0.0001 | 23.14 | <0.0001 |
| logSR | 1,17 | 1.09 | 0.31 | 0.78 | 0.38 | 0.45 | 0.51 |
| SH | 1,66 | 5.77 | 0.01 | 17.32 | 0.0001 | 15.61 | 0.0002 |
| PH | 1,66 | 3.41 | 0.06 | 1.35 | 0.24 | < 0.0001 | 0.99 |
| SH:PH | 1,66 | 0.25 | 0.62 | 1.69 | 0.19 | 0.75 | 0.38 |
| logSR:SH | 1,66 | 0.32 | 0.57 | 0.05 | 0.81 | 0.85 | 0.35 |
| logSR:PH | 1,66 | 4.41 | 0.03 | 1.91 | 0.17 | 0.17 | 0.67 |
| logSR:SH:PH | 1,66 | < 0.0001 | 0.99 | 0.01 | 0.91 | 0.75 | 0.38 |
| **Symbiotroph (%)** | | | | | | | |
| Intercept | 1,66 | 277.04 | <0.0001 | 376.13 | <0.0001 | 55.83 | <0.0001 |
| logSR | 1,17 | 1.64 | 0.21 | 3.61 | 0.07 | 0.28 | 0.59 |
| SH | 1,66 | 5.71 | 0.019 | 3.43 | 0.06 | 0.13 | 0.71 |
| PH | 1,66 | 0.03 | 0.85 | 1.88 | 0.17 | 0.018 | 0.89 |
| SH:PH | 1 ,66 | 1.98 | 0.16 | 0.34 | 0.55 | 0.72 | 0.39 |
| logSR:SH | 1,66 | 0.39 | 0.53 | 5.61 | 0.021 | 0.35 | 0.55 |
| logSR:PH | 1,66 | 0.86 | 0.35 | 2.07 | 0.15 | 0.008 | 0.92 |
| logSR:SH:PH | 1,66 | 0.003 | 0.95 | 0.0037 | 0.95 | 0.368 | 0.54 |
