# Supplementary material
Source: Research Square preprint supplement (doi:10.21203/rs.3.rs-8899582/v1)
Supplement: Supplementary file 2 [file 5f85b00fb06e9849c4ba83a6.xlsx]

## Sheet: Dataset S1
Dataset S1: Plant species composition in Jena Tron experiment
Plant community	Plant diversity level	Plant species composition
1	1	Anthoxanthum odoratum
2	1	Dactylis glomerata
3	1	Holcus lanatus
4	1	Leucanthemum vulgare
5	1	Plantago lanceolata
6	1	Ranunculus acris
7	2	A. odoratum + D. glomerata
8	2	A. odoratrum + H. lanatus
9	2	A. odoratum + P. lanceolata
10	2	A. odoratum + R. acris
11	2	D. glomerata + H. lanatus
12	2	D. glomerata + L. vulgare
13	2	D. glomerata + P. lanceolata
14	2	H. lanatus + P. lanceolata
15	2	L. vulgare + R. acris
16	3	A. odoratum + D. glomerata + H. lanatus
17	3	A. odoratum + D. glomerata + P. lanceolata
18	3	A. odoratum + D. glomerata + R. acris
19	3	A. odoratum + H. lanatus + P. lanceolata
20	3	A. odoratum + L. vulgare + R. acris
21	3	D. glomerata + H. lanatus + P. lanceolata
22	3	D. glomerata + L. vulgare + P. lanceolata
23	6	A. odoratum + D. glomerata + H. lanatus + L. vulgare + P. lanceolata + R. acris
24	6	A. odoratum + D. glomerata + H. lanatus + L. vulgare + P. lanceolata + R. acris

## Sheet: Dataset S2
		Dataset S2: Read statistics of ITS sequencing of samples from Bulk soil, rhizosphere and root
Group	Sample	Filename	Total Sequences	Sequences flagged as poor quality	Sequence length	%GC	total_deduplicated_percentage	avg_sequence_length
Bulksoil	BS001.fwd	BS001.fwd.fastq.gz	49188	0	70-281	51	3.98471	240.568
Bulksoil	BS001.rvs	BS001.rvs.fastq.gz	49188	0	70-282	53	3.64316	195.004
Bulksoil	BS002.fwd	BS002.fwd.fastq.gz	59116	0	70-281	52	3.75533	234.552
Bulksoil	BS002.rvs	BS002.rvs.fastq.gz	59116	0	70-282	53	3.38656	195.738
Bulksoil	BS003.fwd	BS003.fwd.fastq.gz	54116	0	70-281	53	3.8362	238.577
Bulksoil	BS003.rvs	BS003.rvs.fastq.gz	54116	0	70-282	54	3.70131	190.201
Bulksoil	BS004.fwd	BS004.fwd.fastq.gz	54814	0	70-281	52	3.84938	235.919
Bulksoil	BS004.rvs	BS004.rvs.fastq.gz	54814	0	70-282	54	3.51735	192.512
Bulksoil	BS005.fwd	BS005.fwd.fastq.gz	50629	0	70-281	53	3.81204	232.356
Bulksoil	BS005.rvs	BS005.rvs.fastq.gz	50629	0	70-282	55	3.45454	188.58
Bulksoil	BS006.fwd	BS006.fwd.fastq.gz	58938	0	70-281	53	3.79042	226.765
Bulksoil	BS006.rvs	BS006.rvs.fastq.gz	58938	0	70-282	55	3.19488	194.503
Bulksoil	BS007.fwd	BS007.fwd.fastq.gz	61201	0	70-281	53	3.69438	233.705
Bulksoil	BS007.rvs	BS007.rvs.fastq.gz	61201	0	70-283	54	3.21727	196.534
Bulksoil	BS008.fwd	BS008.fwd.fastq.gz	57480	0	70-281	53	3.65518	234.485
Bulksoil	BS008.rvs	BS008.rvs.fastq.gz	57480	0	70-282	55	3.36117	192.813
Bulksoil	BS009.fwd	BS009.fwd.fastq.gz	65015	0	70-283	53	3.15158	235.86
Bulksoil	BS009.rvs	BS009.rvs.fastq.gz	65015	0	70-282	55	3.06391	193.542
Bulksoil	BS010.fwd	BS010.fwd.fastq.gz	61379	0	70-280	51	3.53704	226.742
Bulksoil	BS010.rvs	BS010.rvs.fastq.gz	61379	0	70-282	52	3.09389	197.33
Bulksoil	BS011.fwd	BS011.fwd.fastq.gz	57648	0	70-280	52	3.57688	239.472
Bulksoil	BS011.rvs	BS011.rvs.fastq.gz	57648	0	70-282	54	3.42943	188.886
Bulksoil	BS012.fwd	BS012.fwd.fastq.gz	55290	0	70-281	52	3.79996	238.517
Bulksoil	BS012.rvs	BS012.rvs.fastq.gz	55290	0	70-282	53	3.62814	189.51
Bulksoil	BS013.fwd	BS013.fwd.fastq.gz	57202	0	70-281	52	3.82854	239.795
Bulksoil	BS013.rvs	BS013.rvs.fastq.gz	57202	0	70-283	53	3.41771	186.873
Bulksoil	BS014.fwd	BS014.fwd.fastq.gz	61656	0	70-281	53	3.66226	230.461
Bulksoil	BS014.rvs	BS014.rvs.fastq.gz	61656	0	70-282	54	3.14	188.731
Bulksoil	BS015.fwd	BS015.fwd.fastq.gz	69746	0	70-281	52	3.99163	214.195
Bulksoil	BS015.rvs	BS015.rvs.fastq.gz	69746	0	70-282	53	3.36077	181.666
Bulksoil	BS016.fwd	BS016.fwd.fastq.gz	48348	0	70-280	47	4.26698	205.985
Bulksoil	BS016.rvs	BS016.rvs.fastq.gz	48348	0	70-282	49	4.04153	158.261
Bulksoil	BS017.fwd	BS017.fwd.fastq.gz	57121	0	70-281	50	3.71492	235.279
Bulksoil	BS017.rvs	BS017.rvs.fastq.gz	57121	0	70-283	52	3.34903	196.649
Bulksoil	BS018.fwd	BS018.fwd.fastq.gz	52777	0	70-281	51	4.25754	220.482
Bulksoil	BS018.rvs	BS018.rvs.fastq.gz	52777	0	70-282	53	3.46363	197.248
Bulksoil	BS019.fwd	BS019.fwd.fastq.gz	55022	0	70-281	53	3.6967	236.282
Bulksoil	BS019.rvs	BS019.rvs.fastq.gz	55022	0	70-282	55	3.4677	184.999
Bulksoil	BS020.fwd	BS020.fwd.fastq.gz	52563	0	70-281	52	4.36238	224.988
Bulksoil	BS020.rvs	BS020.rvs.fastq.gz	52563	0	70-282	54	3.61851	185.935
Bulksoil	BS021.fwd	BS021.fwd.fastq.gz	54522	0	70-281	54	3.36745	236.485
Bulksoil	BS021.rvs	BS021.rvs.fastq.gz	54522	0	70-282	56	3.2629	176.734
Bulksoil	BS022.fwd	BS022.fwd.fastq.gz	54855	0	70-278	50	3.89937	224.992
Bulksoil	BS022.rvs	BS022.rvs.fastq.gz	54855	0	70-282	51	3.2832	198.691
Bulksoil	BS023.fwd	BS023.fwd.fastq.gz	49557	0	70-281	53	4.16288	217.585
Bulksoil	BS023.rvs	BS023.rvs.fastq.gz	49557	0	70-282	55	3.79765	177.06
Bulksoil	BS024.fwd	BS024.fwd.fastq.gz	55464	0	70-280	51	3.97195	234.474
Bulksoil	BS024.rvs	BS024.rvs.fastq.gz	55464	0	70-282	52	3.76641	192.732
Bulksoil	BS025.fwd	BS025.fwd.fastq.gz	49464	0	70-280	51	4.12421	239.575
Bulksoil	BS025.rvs	BS025.rvs.fastq.gz	49464	0	70-282	52	3.66529	200.816
Bulksoil	BS026.fwd	BS026.fwd.fastq.gz	50782	0	70-281	54	3.84585	229.673
Bulksoil	BS026.rvs	BS026.rvs.fastq.gz	50782	0	70-282	56	3.24131	191.498
Bulksoil	BS027.fwd	BS027.fwd.fastq.gz	49175	0	70-280	52	4.0122	241.474
Bulksoil	BS027.rvs	BS027.rvs.fastq.gz	49175	0	70-283	54	3.64616	191.434
Bulksoil	BS028.fwd	BS028.fwd.fastq.gz	49169	0	70-280	52	4.00862	238.448
Bulksoil	BS028.rvs	BS028.rvs.fastq.gz	49169	0	70-287	54	3.82355	190.661
Bulksoil	BS029.fwd	BS029.fwd.fastq.gz	47635	0	70-281	52	3.89629	239.587
Bulksoil	BS029.rvs	BS029.rvs.fastq.gz	47635	0	70-282	53	3.63598	194.008
Bulksoil	BS030.fwd	BS030.fwd.fastq.gz	44754	0	70-280	51	4.24096	228.465
Bulksoil	BS030.rvs	BS030.rvs.fastq.gz	44754	0	70-282	52	3.50136	198.798
Bulksoil	BS031.fwd	BS031.fwd.fastq.gz	48660	0	70-281	52	3.7053	235.586
Bulksoil	BS031.rvs	BS031.rvs.fastq.gz	48660	0	70-284	53	3.24085	196.913
Bulksoil	BS032.fwd	BS032.fwd.fastq.gz	52393	0	70-280	54	3.65316	215.112
Bulksoil	BS032.rvs	BS032.rvs.fastq.gz	52393	0	70-282	56	3.23898	188.936
Bulksoil	BS033.fwd	BS033.fwd.fastq.gz	43655	0	70-281	52	4.39812	240.951
Bulksoil	BS033.rvs	BS033.rvs.fastq.gz	43655	0	70-282	53	4.10491	196.71
Bulksoil	BS034.fwd	BS034.fwd.fastq.gz	47415	0	70-280	52	4.25604	237.02
Bulksoil	BS034.rvs	BS034.rvs.fastq.gz	47415	0	70-282	54	3.72878	196.494
Bulksoil	BS035.fwd	BS035.fwd.fastq.gz	46296	0	70-281	53	4.44963	239.969
Bulksoil	BS035.rvs	BS035.rvs.fastq.gz	46296	0	70-282	55	4.06083	187.385
Bulksoil	BS036.fwd	BS036.fwd.fastq.gz	42356	0	70-281	51	4.57078	234.444
Bulksoil	BS036.rvs	BS036.rvs.fastq.gz	42356	0	70-282	52	4.06554	188.193
Bulksoil	BS037.fwd	BS037.fwd.fastq.gz	42413	0	70-280	51	4.05064	238.607
Bulksoil	BS037.rvs	BS037.rvs.fastq.gz	42413	0	70-282	53	4.00349	183.256
Bulksoil	BS038.fwd	BS038.fwd.fastq.gz	39563	0	70-280	52	4.51179	221.439
Bulksoil	BS038.rvs	BS038.rvs.fastq.gz	39563	0	70-282	55	3.72065	195.991
Bulksoil	BS039.fwd	BS039.fwd.fastq.gz	45895	0	70-281	51	4.16385	236.452
Bulksoil	BS039.rvs	BS039.rvs.fastq.gz	45895	0	70-282	53	3.66489	199.278
Bulksoil	BS040.fwd	BS040.fwd.fastq.gz	46113	0	70-281	52	4.22224	233.696
Bulksoil	BS040.rvs	BS040.rvs.fastq.gz	46113	0	70-282	53	3.89044	193.76
Bulksoil	BS041.fwd	BS041.fwd.fastq.gz	56103	0	70-280	51	3.42049	238.254
Bulksoil	BS041.rvs	BS041.rvs.fastq.gz	56103	0	70-282	53	3.33494	191.245
Bulksoil	BS042.fwd	BS042.fwd.fastq.gz	59138	0	70-281	51	3.58822	235.547
Bulksoil	BS042.rvs	BS042.rvs.fastq.gz	59138	0	70-282	52	3.18408	195.836
Bulksoil	BS043.fwd	BS043.fwd.fastq.gz	56423	0	70-281	52	3.93634	240.861
Bulksoil	BS043.rvs	BS043.rvs.fastq.gz	56423	0	70-282	53	3.54643	186.846
Bulksoil	BS044.fwd	BS044.fwd.fastq.gz	52280	0	70-280	52	3.59411	234.877
Bulksoil	BS044.rvs	BS044.rvs.fastq.gz	52280	0	70-282	53	3.59028	184.715
Bulksoil	BS045.fwd	BS045.fwd.fastq.gz	48250	0	70-281	53	3.39896	236.99
Bulksoil	BS045.rvs	BS045.rvs.fastq.gz	48250	0	70-282	56	3.42176	179.793
Bulksoil	BS046.fwd	BS046.fwd.fastq.gz	50946	0	70-280	52	4.16716	227.234
Bulksoil	BS046.rvs	BS046.rvs.fastq.gz	50946	0	70-282	54	3.73533	191.673
Bulksoil	BS047.fwd	BS047.fwd.fastq.gz	56715	0	70-277	52	3.76973	235.592
Bulksoil	BS047.rvs	BS047.rvs.fastq.gz	56715	0	70-282	53	3.56167	189.396
Bulksoil	BS048.fwd	BS048.fwd.fastq.gz	55064	0	70-280	51	3.71931	237.534
Bulksoil	BS048.rvs	BS048.rvs.fastq.gz	55064	0	70-282	53	3.46506	191.496
Bulksoil	BS049.fwd	BS049.fwd.fastq.gz	56470	0	70-281	53	3.71525	239.861
Bulksoil	BS049.rvs	BS049.rvs.fastq.gz	56470	0	70-282	54	3.59306	197.107
Bulksoil	BS050.fwd	BS050.fwd.fastq.gz	57700	0	70-281	51	3.74523	238.381
Bulksoil	BS050.rvs	BS050.rvs.fastq.gz	57700	0	70-285	53	3.25997	198.116
Bulksoil	BS051.fwd	BS051.fwd.fastq.gz	55416	0	70-280	52	3.80035	241.478
Bulksoil	BS051.rvs	BS051.rvs.fastq.gz	55416	0	70-282	53	3.5441	191.891
Bulksoil	BS052.fwd	BS052.fwd.fastq.gz	52173	0	70-281	52	3.70306	239.102
Bulksoil	BS052.rvs	BS052.rvs.fastq.gz	52173	0	70-282	54	3.45198	191.434
Bulksoil	BS053.fwd	BS053.fwd.fastq.gz	51888	0	70-281	52	3.96816	238.061
Bulksoil	BS053.rvs	BS053.rvs.fastq.gz	51888	0	70-282	54	3.82555	190.102
Bulksoil	BS054.fwd	BS054.fwd.fastq.gz	51025	0	70-281	51	4.34297	228.287
Bulksoil	BS054.rvs	BS054.rvs.fastq.gz	51025	0	70-282	53	3.83341	199.61
Bulksoil	BS055.fwd	BS055.fwd.fastq.gz	51534	0	70-282	52	3.91004	237.682
Bulksoil	BS055.rvs	BS055.rvs.fastq.gz	51534	0	70-282	54	3.61315	194.915
Bulksoil	BS056.fwd	BS056.fwd.fastq.gz	56475	0	70-282	52	3.88668	237.497
Bulksoil	BS056.rvs	BS056.rvs.fastq.gz	56475	0	70-282	53	3.60691	196.483
Bulksoil	BS057.fwd	BS057.fwd.fastq.gz	45675	0	70-281	53	3.92118	239.146
Bulksoil	BS057.rvs	BS057.rvs.fastq.gz	45675	0	70-282	54	3.74165	191.561
Bulksoil	BS058.fwd	BS058.fwd.fastq.gz	40329	0	70-281	51	3.98225	240.866
Bulksoil	BS058.rvs	BS058.rvs.fastq.gz	40329	0	70-283	53	3.73181	194.952
Bulksoil	BS059.fwd	BS059.fwd.fastq.gz	42657	0	70-280	53	4.21736	241.627
Bulksoil	BS059.rvs	BS059.rvs.fastq.gz	42657	0	70-282	55	3.87275	187.998
Bulksoil	BS060.fwd	BS060.fwd.fastq.gz	45674	0	70-281	53	3.69357	239.728
Bulksoil	BS060.rvs	BS060.rvs.fastq.gz	45674	0	70-282	55	3.54469	187.54
Bulksoil	BS061.fwd	BS061.fwd.fastq.gz	41044	0	70-280	53	4.13946	239.28
Bulksoil	BS061.rvs	BS061.rvs.fastq.gz	41044	0	70-282	55	4.03713	183.946
Bulksoil	BS062.fwd	BS062.fwd.fastq.gz	44985	0	70-281	53	3.84573	228.646
Bulksoil	BS062.rvs	BS062.rvs.fastq.gz	44985	0	70-282	54	3.25886	193.612
Bulksoil	BS063.fwd	BS063.fwd.fastq.gz	45566	0	70-287	54	3.80986	237.197
Bulksoil	BS063.rvs	BS063.rvs.fastq.gz	45566	0	70-282	56	3.55309	191.109
Bulksoil	BS064.fwd	BS064.fwd.fastq.gz	45022	0	70-281	55	3.66043	235.57
Bulksoil	BS064.rvs	BS064.rvs.fastq.gz	45022	0	70-283	57	3.40944	184.762
Bulksoil	BS065.fwd	BS065.fwd.fastq.gz	51846	0	70-281	52	3.84793	238.437
Bulksoil	BS065.rvs	BS065.rvs.fastq.gz	51846	0	70-282	54	3.52004	191.603
Bulksoil	BS066.fwd	BS066.fwd.fastq.gz	51184	0	70-281	53	3.85863	237.581
Bulksoil	BS066.rvs	BS066.rvs.fastq.gz	51184	0	70-282	54	3.61246	195.907
Bulksoil	BS067.fwd	BS067.fwd.fastq.gz	50799	0	70-281	52	3.6733	238.978
Bulksoil	BS067.rvs	BS067.rvs.fastq.gz	50799	0	70-282	54	3.38983	187.484
Bulksoil	BS068.fwd	BS068.fwd.fastq.gz	49134	0	70-280	52	3.84255	237.495
Bulksoil	BS068.rvs	BS068.rvs.fastq.gz	49134	0	70-283	54	3.57186	184.245
Bulksoil	BS069.fwd	BS069.fwd.fastq.gz	40548	0	70-281	52	4.17037	234.215
Bulksoil	BS069.rvs	BS069.rvs.fastq.gz	40548	0	70-282	54	3.95827	175.938
Bulksoil	BS070.fwd	BS070.fwd.fastq.gz	49208	0	70-281	51	4.34685	225.341
Bulksoil	BS070.rvs	BS070.rvs.fastq.gz	49208	0	70-282	53	3.82255	195.711
Bulksoil	BS071.fwd	BS071.fwd.fastq.gz	51186	0	70-281	52	3.9503	240.294
Bulksoil	BS071.rvs	BS071.rvs.fastq.gz	51186	0	70-282	53	3.57324	193.543
Bulksoil	BS072.fwd	BS072.fwd.fastq.gz	49514	0	70-281	51	3.83326	240.056
Bulksoil	BS072.rvs	BS072.rvs.fastq.gz	49514	0	70-282	53	3.45155	191.234
Bulksoil	BS073.fwd	BS073.fwd.fastq.gz	52211	0	70-281	53	3.64674	232.818
Bulksoil	BS073.rvs	BS073.rvs.fastq.gz	52211	0	70-282	55	3.38434	195.331
Bulksoil	BS074.fwd	BS074.fwd.fastq.gz	55555	0	70-281	52	3.88264	231.544
Bulksoil	BS074.rvs	BS074.rvs.fastq.gz	55555	0	70-282	54	3.45783	194.367
Bulksoil	BS075.fwd	BS075.fwd.fastq.gz	57285	0	70-282	50	3.66588	242.415
Bulksoil	BS075.rvs	BS075.rvs.fastq.gz	57285	0	70-283	51	3.4564	196.388
Bulksoil	BS076.fwd	BS076.fwd.fastq.gz	56036	0	70-281	51	3.77614	236.253
Bulksoil	BS076.rvs	BS076.rvs.fastq.gz	56036	0	70-282	53	3.52095	190.909
Bulksoil	BS077.fwd	BS077.fwd.fastq.gz	55278	0	70-281	52	3.90029	235.774
Bulksoil	BS077.rvs	BS077.rvs.fastq.gz	55278	0	70-282	54	3.56561	191.047
Bulksoil	BS078.fwd	BS078.fwd.fastq.gz	54638	0	70-281	54	3.7904	223.069
Bulksoil	BS078.rvs	BS078.rvs.fastq.gz	54638	0	70-282	56	3.22669	192.988
Bulksoil	BS079.fwd	BS079.fwd.fastq.gz	55204	0	70-280	52	3.62655	237.366
Bulksoil	BS079.rvs	BS079.rvs.fastq.gz	55204	0	70-282	53	3.35664	197.492
Bulksoil	BS080.fwd	BS080.fwd.fastq.gz	63578	0	70-281	52	3.55783	234.893
Bulksoil	BS080.rvs	BS080.rvs.fastq.gz	63578	0	70-282	53	3.31561	191.654
Bulksoil	BS081.fwd	BS081.fwd.fastq.gz	56420	0	70-281	52	3.65828	238.981
Bulksoil	BS081.rvs	BS081.rvs.fastq.gz	56420	0	70-282	53	3.36228	196.547
Bulksoil	BS082.fwd	BS082.fwd.fastq.gz	56363	0	70-281	51	3.5573	237.661
Bulksoil	BS082.rvs	BS082.rvs.fastq.gz	56363	0	70-282	52	3.35149	199.037
Bulksoil	BS083.fwd	BS083.fwd.fastq.gz	55683	0	70-281	54	3.53788	236.819
Bulksoil	BS083.rvs	BS083.rvs.fastq.gz	55683	0	70-282	56	3.33136	185.82
Bulksoil	BS084.fwd	BS084.fwd.fastq.gz	64782	0	70-280	52	3.85601	203.486
Bulksoil	BS084.rvs	BS084.rvs.fastq.gz	64782	0	70-282	54	3.18298	186.232
Bulksoil	BS085.fwd	BS085.fwd.fastq.gz	53013	0	70-281	53	3.73871	235.235
Bulksoil	BS085.rvs	BS085.rvs.fastq.gz	53013	0	70-282	55	3.52932	186.889
Bulksoil	BS086.fwd	BS086.fwd.fastq.gz	53284	0	70-281	51	4.14571	224.269
Bulksoil	BS086.rvs	BS086.rvs.fastq.gz	53284	0	70-282	53	3.59958	196.425
Bulksoil	BS087.fwd	BS087.fwd.fastq.gz	54497	0	70-281	51	3.93416	236.896
Bulksoil	BS087.rvs	BS087.rvs.fastq.gz	54497	0	70-282	52	3.40202	199.017
Bulksoil	BS088.fwd	BS088.fwd.fastq.gz	55893	0	70-281	53	3.67309	235.773
Bulksoil	BS088.rvs	BS088.rvs.fastq.gz	55893	0	70-283	55	3.45839	190.735
Bulksoil	BS089.fwd	BS089.fwd.fastq.gz	70629	0	70-281	51	3.59909	237.248
Bulksoil	BS089.rvs	BS089.rvs.fastq.gz	70629	0	70-282	53	3.14602	197.32
Bulksoil	BS090.fwd	BS090.fwd.fastq.gz	66083	0	70-279	52	3.31855	233.581
Bulksoil	BS090.rvs	BS090.rvs.fastq.gz	66083	0	70-285	54	3.08703	196.804
Bulksoil	BS091.fwd	BS091.fwd.fastq.gz	61365	0	70-278	54	3.282	240.068
Bulksoil	BS091.rvs	BS091.rvs.fastq.gz	61365	0	70-282	56	3.33904	175.624
Bulksoil	BS092.fwd	BS092.fwd.fastq.gz	72246	0	70-281	51	2.79462	236.995
Bulksoil	BS092.rvs	BS092.rvs.fastq.gz	72246	0	70-282	53	2.86659	193.972
Bulksoil	BS093.fwd	BS093.fwd.fastq.gz	55537	0	70-281	53	3.50577	230.337
Bulksoil	BS093.rvs	BS093.rvs.fastq.gz	55537	0	70-282	55	3.61021	166.028
Bulksoil	BS094.fwd	BS094.fwd.fastq.gz	60666	0	70-280	54	3.34784	227.89
Bulksoil	BS094.rvs	BS094.rvs.fastq.gz	60666	0	70-282	56	3.06762	191.554
Bulksoil	BS095.fwd	BS095.fwd.fastq.gz	62771	0	70-278	54	3.3439	230.392
Bulksoil	BS095.rvs	BS095.rvs.fastq.gz	62771	0	70-281	56	3.19415	192.415
Bulksoil	BS096.fwd	BS096.fwd.fastq.gz	66560	0	70-280	53	3.35487	234.364
Bulksoil	BS096.rvs	BS096.rvs.fastq.gz	66560	0	70-282	54	3.128	199.2
	RS001.fwd	RS001.fwd.fastq.gz	75423	0	70-278	51	3.40215	241.482
	RS001.rvs	RS001.rvs.fastq.gz	75423	0	70-280	53	3.6872	180.653
	RS002.fwd	RS002.fwd.fastq.gz	76963	0	70-278	52	3.20933	229.73
	RS002.rvs	RS002.rvs.fastq.gz	76963	0	70-282	54	2.98325	203.312
	RS003.fwd	RS003.fwd.fastq.gz	79102	0	70-278	52	3.12255	232.087
	RS003.rvs	RS003.rvs.fastq.gz	79102	0	70-280	54	2.97464	199.481
	RS004.fwd	RS004.fwd.fastq.gz	74631	0	70-281	49	3.30024	241.75
	RS004.rvs	RS004.rvs.fastq.gz	74631	0	70-280	50	3.11131	200.045
	RS005.fwd	RS005.fwd.fastq.gz	83085	0	70-278	51	3.19913	240.876
	RS005.rvs	RS005.rvs.fastq.gz	83085	0	70-280	53	3.01619	198.542
	RS006.fwd	RS006.fwd.fastq.gz	83688	0	70-279	51	3.40312	241.403
	RS006.rvs	RS006.rvs.fastq.gz	83688	0	70-285	52	3.07332	201.798
	RS007.fwd	RS007.fwd.fastq.gz	67469	0	70-280	51	3.7558	222.192
	RS007.rvs	RS007.rvs.fastq.gz	67469	0	70-279	54	3.48605	187.125
	RS008.fwd	RS008.fwd.fastq.gz	80727	0	70-278	51	3.41521	239.738
	RS008.rvs	RS008.rvs.fastq.gz	80727	0	70-281	53	3.29877	199.907
	RS009.fwd	RS009.fwd.fastq.gz	74527	0	70-278	51	3.44305	237.547
	RS009.rvs	RS009.rvs.fastq.gz	74527	0	70-281	52	3.08345	205.785
	RS010.fwd	RS010.fwd.fastq.gz	76208	0	70-279	52	3.39203	235.164
	RS010.rvs	RS010.rvs.fastq.gz	76208	0	70-281	53	3.01806	205.979
	RS011.fwd	RS011.fwd.fastq.gz	71599	0	70-281	51	3.19558	240.266
	RS011.rvs	RS011.rvs.fastq.gz	71599	0	70-281	53	3.0601	203.701
	RS012.fwd	RS012.fwd.fastq.gz	78197	0	70-278	53	3.04487	235.825
	RS012.rvs	RS012.rvs.fastq.gz	78197	0	70-280	54	2.96559	196.493
	RS013.fwd	RS013.fwd.fastq.gz	81839	0	70-281	51	3.20263	243.355
	RS013.rvs	RS013.rvs.fastq.gz	81839	0	70-280	52	3.08166	204.475
	RS014.fwd	RS014.fwd.fastq.gz	70418	0	70-281	52	3.00775	239.815
	RS014.rvs	RS014.rvs.fastq.gz	70418	0	70-282	54	2.99213	203.219
	RS015.fwd	RS015.fwd.fastq.gz	73362	0	70-279	53	3.44865	228.407
	RS015.rvs	RS015.rvs.fastq.gz	73362	0	70-280	54	2.9593	202.458
	RS016.fwd	RS016.fwd.fastq.gz	72655	0	70-281	51	3.08857	238.02
	RS016.rvs	RS016.rvs.fastq.gz	72655	0	70-281	52	2.85872	202.15
	RS017.fwd	RS017.fwd.fastq.gz	71712	0	70-281	51	3.36206	237.931
	RS017.rvs	RS017.rvs.fastq.gz	71712	0	70-280	53	3.18496	202.055
	RS018.fwd	RS018.fwd.fastq.gz	77566	0	70-279	51	3.43449	225.187
	RS018.rvs	RS018.rvs.fastq.gz	77566	0	70-281	52	3.0155	208.414
	RS019.fwd	RS019.fwd.fastq.gz	76961	0	70-279	51	3.21981	240.645
	RS019.rvs	RS019.rvs.fastq.gz	76961	0	70-280	52	3.15744	200.853
	RS020.fwd	RS020.fwd.fastq.gz	73659	0	70-280	50	3.27455	241.527
	RS020.rvs	RS020.rvs.fastq.gz	73659	0	70-284	51	3.31528	200.387
	RS021.fwd	RS021.fwd.fastq.gz	82174	0	70-282	51	3.11899	241.795
	RS021.rvs	RS021.rvs.fastq.gz	82174	0	70-283	52	2.88899	203.219
	RS022.fwd	RS022.fwd.fastq.gz	77547	0	70-278	55	2.98013	232.908
	RS022.rvs	RS022.rvs.fastq.gz	77547	0	70-280	57	2.8602	189
	RS023.fwd	RS023.fwd.fastq.gz	81405	0	70-279	53	3.00473	231.211
	RS023.rvs	RS023.rvs.fastq.gz	81405	0	70-283	55	2.83152	197.836
	RS024.fwd	RS024.fwd.fastq.gz	67842	0	70-280	52	3.91645	220.566
	RS024.rvs	RS024.rvs.fastq.gz	67842	0	70-280	54	3.42118	185.408
	RS025.fwd	RS025.fwd.fastq.gz	62184	0	70-278	52	3.50572	240.774
	RS025.rvs	RS025.rvs.fastq.gz	62184	0	70-283	54	3.37547	200.275
	RS026.fwd	RS026.fwd.fastq.gz	71951	0	70-281	51	3.19662	237.706
	RS026.rvs	RS026.rvs.fastq.gz	71951	0	70-280	52	3.03123	204.474
	RS027.fwd	RS027.fwd.fastq.gz	66854	0	70-280	51	3.38948	240.739
	RS027.rvs	RS027.rvs.fastq.gz	66854	0	70-281	52	3.20549	202.403
	RS028.fwd	RS028.fwd.fastq.gz	70784	0	70-283	52	3.29736	241.375
	RS028.rvs	RS028.rvs.fastq.gz	70784	0	70-280	53	3.21259	199.369
	RS029.fwd	RS029.fwd.fastq.gz	67137	0	70-279	53	3.1324	242.404
	RS029.rvs	RS029.rvs.fastq.gz	67137	0	70-281	55	3.05644	201.658
	RS030.fwd	RS030.fwd.fastq.gz	68831	0	70-278	52	3.35605	237.897
	RS030.rvs	RS030.rvs.fastq.gz	68831	0	70-280	53	2.97105	197.786
	RS031.fwd	RS031.fwd.fastq.gz	71547	0	70-278	53	3.22865	238.716
	RS031.rvs	RS031.rvs.fastq.gz	71547	0	70-282	55	3.03577	199.178
	RS032.fwd	RS032.fwd.fastq.gz	73986	0	70-278	51	3.29522	241.434
	RS032.rvs	RS032.rvs.fastq.gz	73986	0	70-282	53	3.14519	202.853
	RS033.fwd	RS033.fwd.fastq.gz	62563	0	70-280	52	3.59957	237.505
	RS033.rvs	RS033.rvs.fastq.gz	62563	0	70-283	53	3.2703	200.968
	RS034.fwd	RS034.fwd.fastq.gz	64640	0	70-280	52	3.76238	228.453
	RS034.rvs	RS034.rvs.fastq.gz	64640	0	70-283	54	3.27661	206.213
	RS035.fwd	RS035.fwd.fastq.gz	53644	0	70-281	53	3.48781	237.07
	RS035.rvs	RS035.rvs.fastq.gz	53644	0	70-279	55	3.31817	201.665
	RS036.fwd	RS036.fwd.fastq.gz	63705	0	70-281	51	4.02637	213.703
	RS036.rvs	RS036.rvs.fastq.gz	63705	0	70-281	53	3.32941	199.993
	RS037.fwd	RS037.fwd.fastq.gz	64074	0	70-280	51	3.65983	243.181
	RS037.rvs	RS037.rvs.fastq.gz	64074	0	70-283	52	3.37578	204.693
	RS038.fwd	RS038.fwd.fastq.gz	63446	0	70-278	50	3.52268	240.389
	RS038.rvs	RS038.rvs.fastq.gz	63446	0	70-281	51	3.38713	207.448
	RS039.fwd	RS039.fwd.fastq.gz	63698	0	70-280	47	3.10214	246.758
	RS039.rvs	RS039.rvs.fastq.gz	63698	0	70-283	48	2.91218	213.319
	RS040.fwd	RS040.fwd.fastq.gz	60887	0	70-277	52	3.11232	239.888
	RS040.rvs	RS040.rvs.fastq.gz	60887	0	70-283	54	3.09918	203.275
	RS041.fwd	RS041.fwd.fastq.gz	72509	0	70-280	50	3.21477	242.979
	RS041.rvs	RS041.rvs.fastq.gz	72509	0	70-281	52	3.06031	202.407
	RS042.fwd	RS042.fwd.fastq.gz	83221	0	70-278	52	2.81179	234.146
	RS042.rvs	RS042.rvs.fastq.gz	83221	0	70-281	53	2.64477	201.445
	RS043.fwd	RS043.fwd.fastq.gz	77935	0	70-280	49	3.16161	243.162
	RS043.rvs	RS043.rvs.fastq.gz	77935	0	70-280	50	3.04869	205.115
	RS044.fwd	RS044.fwd.fastq.gz	66963	0	70-280	52	3.08379	241.086
	RS044.rvs	RS044.rvs.fastq.gz	66963	0	70-280	54	3.14054	192.12
	RS045.fwd	RS045.fwd.fastq.gz	77261	0	70-280	52	3.12965	242.637
	RS045.rvs	RS045.rvs.fastq.gz	77261	0	70-282	54	3.02222	200.448
	RS046.fwd	RS046.fwd.fastq.gz	74949	0	70-278	51	3.3863	240.793
	RS046.rvs	RS046.rvs.fastq.gz	74949	0	70-284	53	3.12613	191.76
	RS047.fwd	RS047.fwd.fastq.gz	77956	0	70-278	51	3.18128	240.013
	RS047.rvs	RS047.rvs.fastq.gz	77956	0	70-280	52	2.99913	199.145
	RS048.fwd	RS048.fwd.fastq.gz	78641	0	70-280	52	3.1256	238.297
	RS048.rvs	RS048.rvs.fastq.gz	78641	0	70-282	53	2.99208	198.373
	RS049.fwd	RS049.fwd.fastq.gz	71212	0	70-281	51	3.31124	233.097
	RS049.rvs	RS049.rvs.fastq.gz	71212	0	70-280	53	3.14694	194.073
	RS050.fwd	RS050.fwd.fastq.gz	68528	0	70-278	51	3.5387	228.842
	RS050.rvs	RS050.rvs.fastq.gz	68528	0	70-282	53	3.0586	207.095
	RS051.fwd	RS051.fwd.fastq.gz	70825	0	70-280	52	3.19802	238.858
	RS051.rvs	RS051.rvs.fastq.gz	70825	0	70-282	54	3.12319	200.647
	RS052.fwd	RS052.fwd.fastq.gz	65243	0	70-280	52	3.3061	235.193
	RS052.rvs	RS052.rvs.fastq.gz	65243	0	70-282	54	3.09918	199.973
	RS053.fwd	RS053.fwd.fastq.gz	78634	0	70-278	52	2.92113	242.17
	RS053.rvs	RS053.rvs.fastq.gz	78634	0	70-281	54	2.79014	200.125
	RS054.fwd	RS054.fwd.fastq.gz	73416	0	70-279	51	3.31944	237.51
	RS054.rvs	RS054.rvs.fastq.gz	73416	0	70-281	52	3.19958	199.602
	RS055.fwd	RS055.fwd.fastq.gz	76014	0	70-281	53	3.01918	236.745
	RS055.rvs	RS055.rvs.fastq.gz	76014	0	70-280	54	2.75476	196.735
	RS056.fwd	RS056.fwd.fastq.gz	73093	0	70-281	52	3.107	241.79
	RS056.rvs	RS056.rvs.fastq.gz	73093	0	70-280	53	3.08237	201.661
	RS057.fwd	RS057.fwd.fastq.gz	61665	0	70-279	52	3.65523	240.264
	RS057.rvs	RS057.rvs.fastq.gz	61665	0	70-281	53	3.35523	202.051
	RS058.fwd	RS058.fwd.fastq.gz	61927	0	70-278	52	3.28451	239.336
	RS058.rvs	RS058.rvs.fastq.gz	61927	0	70-280	54	3.22638	204.573
	RS059.fwd	RS059.fwd.fastq.gz	61254	0	70-278	51	3.56548	242.025
	RS059.rvs	RS059.rvs.fastq.gz	61254	0	70-280	52	3.29285	201.278
	RS060.fwd	RS060.fwd.fastq.gz	58343	0	70-278	51	3.67996	243.159
	RS060.rvs	RS060.rvs.fastq.gz	58343	0	70-280	52	3.53599	196.268
	RS061.fwd	RS061.fwd.fastq.gz	63078	0	70-279	53	3.28641	242.862
	RS061.rvs	RS061.rvs.fastq.gz	63078	0	70-280	54	3.22934	199.888
	RS062.fwd	RS062.fwd.fastq.gz	58584	0	70-281	51	3.55729	242.515
	RS062.rvs	RS062.rvs.fastq.gz	58584	0	70-281	53	3.31661	200.751
	RS063.fwd	RS063.fwd.fastq.gz	65482	0	70-279	52	3.55059	241.443
	RS063.rvs	RS063.rvs.fastq.gz	65482	0	70-281	53	3.37955	198.631
	RS064.fwd	RS064.fwd.fastq.gz	78144	0	70-282	51	3.04054	242.675
	RS064.rvs	RS064.rvs.fastq.gz	78144	0	70-280	52	2.942	203.485
	RS065.fwd	RS065.fwd.fastq.gz	68093	0	70-280	52	3.19416	239.504
	RS065.rvs	RS065.rvs.fastq.gz	68093	0	70-280	54	3.13542	199.03
	RS066.fwd	RS066.fwd.fastq.gz	74361	0	70-279	54	3.07823	230.044
	RS066.rvs	RS066.rvs.fastq.gz	74361	0	70-281	56	2.79582	197.962
	RS067.fwd	RS067.fwd.fastq.gz	64505	0	70-279	50	3.747	234.551
	RS067.rvs	RS067.rvs.fastq.gz	64505	0	70-281	52	3.25091	201.981
	RS068.fwd	RS068.fwd.fastq.gz	68994	0	70-279	53	3.33072	238.667
	RS068.rvs	RS068.rvs.fastq.gz	68994	0	70-280	54	3.15535	194.379
	RS069.fwd	RS069.fwd.fastq.gz	80437	0	70-278	51	3.38899	241.825
	RS069.rvs	RS069.rvs.fastq.gz	80437	0	70-280	52	3.09559	203.676
	RS070.fwd	RS070.fwd.fastq.gz	65281	0	70-279	52	3.40528	236.522
	RS070.rvs	RS070.rvs.fastq.gz	65281	0	70-281	53	3.25975	200.706
	RS071.fwd	RS071.fwd.fastq.gz	71437	0	70-278	51	3.13143	238.578
	RS071.rvs	RS071.rvs.fastq.gz	71437	0	70-281	53	3.00545	202.149
	RS072.fwd	RS072.fwd.fastq.gz	81497	0	70-281	51	3.31178	241.275
	RS072.rvs	RS072.rvs.fastq.gz	81497	0	70-281	52	3.1449	202.717
	RS073.fwd	RS073.fwd.fastq.gz	67140	0	70-278	53	3.11737	237.442
	RS073.rvs	RS073.rvs.fastq.gz	67140	0	70-280	55	3.02651	198.622
	RS074.fwd	RS074.fwd.fastq.gz	70510	0	70-280	51	3.40945	233.512
	RS074.rvs	RS074.rvs.fastq.gz	70510	0	70-282	53	3.0095	207.012
	RS075.fwd	RS075.fwd.fastq.gz	76528	0	70-279	51	3.3491	242.179
	RS075.rvs	RS075.rvs.fastq.gz	76528	0	70-280	52	2.94663	203.737
	RS076.fwd	RS076.fwd.fastq.gz	71721	0	70-279	51	3.45924	240.583
	RS076.rvs	RS076.rvs.fastq.gz	71721	0	70-280	53	3.19293	198.854
	RS077.fwd	RS077.fwd.fastq.gz	75975	0	70-278	52	3.05627	243.056
	RS077.rvs	RS077.rvs.fastq.gz	75975	0	70-281	54	3.01415	202.396
	RS078.fwd	RS078.fwd.fastq.gz	73908	0	70-278	52	3.22293	239.695
	RS078.rvs	RS078.rvs.fastq.gz	73908	0	70-282	54	3.02944	199.763
	RS079.fwd	RS079.fwd.fastq.gz	70124	0	70-280	52	3.27135	236.647
	RS079.rvs	RS079.rvs.fastq.gz	70124	0	70-280	54	3.11591	200.205
	RS080.fwd	RS080.fwd.fastq.gz	75450	0	70-282	53	2.98343	236.242
	RS080.rvs	RS080.rvs.fastq.gz	75450	0	70-282	55	2.80848	197.767
	RS081.fwd	RS081.fwd.fastq.gz	69277	0	70-280	52	3.26515	238.648
	RS081.rvs	RS081.rvs.fastq.gz	69277	0	70-282	53	3.17421	203.49
	RS082.fwd	RS082.fwd.fastq.gz	68361	0	70-281	52	3.4113	229.958
	RS082.rvs	RS082.rvs.fastq.gz	68361	0	70-281	53	3.07339	206.12
	RS083.fwd	RS083.fwd.fastq.gz	72837	0	70-280	50	3.54902	241.023
	RS083.rvs	RS083.rvs.fastq.gz	72837	0	70-282	51	3.26482	208.022
	RS084.fwd	RS084.fwd.fastq.gz	73500	0	70-279	52	2.93741	235.622
	RS084.rvs	RS084.rvs.fastq.gz	73500	0	70-280	54	2.90476	202.265
	RS085.fwd	RS085.fwd.fastq.gz	76438	0	70-281	52	3.13064	242.431
	RS085.rvs	RS085.rvs.fastq.gz	76438	0	70-286	53	3.13718	203.482
	RS086.fwd	RS086.fwd.fastq.gz	74556	0	70-280	50	3.18955	244.2
	RS086.rvs	RS086.rvs.fastq.gz	74556	0	70-281	51	3.12517	206.395
	RS087.fwd	RS087.fwd.fastq.gz	72481	0	70-279	51	3.31949	238.077
	RS087.rvs	RS087.rvs.fastq.gz	72481	0	70-280	53	3.17325	202.804
	RS088.fwd	RS088.fwd.fastq.gz	73798	0	70-280	52	3.40118	238.901
	RS088.rvs	RS088.rvs.fastq.gz	73798	0	70-281	53	3.34291	202.327
	RS089.fwd	RS089.fwd.fastq.gz	78809	0	70-278	53	3.05676	240.393
	RS089.rvs	RS089.rvs.fastq.gz	78809	0	70-283	55	2.89307	200.517
	RS090.fwd	RS090.fwd.fastq.gz	89761	0	70-281	52	3.16841	236.498
	RS090.rvs	RS090.rvs.fastq.gz	89761	0	70-282	53	2.81191	204.632
	RS091.fwd	RS091.fwd.fastq.gz	83839	0	70-279	55	2.88052	229.999
	RS091.rvs	RS091.rvs.fastq.gz	83839	0	70-280	57	2.57279	193.711
	RS092.fwd	RS092.fwd.fastq.gz	81602	0	70-280	52	2.9938	239.621
	RS092.rvs	RS092.rvs.fastq.gz	81602	0	70-282	54	2.91169	198.963
	RS093.fwd	RS093.fwd.fastq.gz	102979	0	70-285	53	2.83067	239.941
	RS093.rvs	RS093.rvs.fastq.gz	102979	0	70-282	55	2.55198	202.246
	RS094.fwd	RS094.fwd.fastq.gz	104594	0	70-280	51	2.89309	241.426
	RS094.rvs	RS094.rvs.fastq.gz	104594	0	70-282	52	2.7927	203.399
	RS095.fwd	RS095.fwd.fastq.gz	85867	0	70-278	51	3.29929	236.405
	RS095.rvs	RS095.rvs.fastq.gz	85867	0	70-282	53	2.96971	202.522
	RS096.fwd	RS096.fwd.fastq.gz	98962	0	70-280	51	2.83139	238.423
	RS096.rvs	RS096.rvs.fastq.gz	98962	0	70-282	53	2.72428	204.385
	RS097.fwd	RS097.fwd.fastq.gz	77025	0	70-280	51	3.14573	240.534
	RS097.rvs	RS097.rvs.fastq.gz	77025	0	70-282	53	3.18468	203.51
	RS098.fwd	RS098.fwd.fastq.gz	85090	0	70-278	52	3.37878	236.061
	RS098.rvs	RS098.rvs.fastq.gz	85090	0	70-281	54	2.98978	203.064
	RS099.fwd	RS099.fwd.fastq.gz	82725	0	70-280	51	3.24207	243.003
	RS099.rvs	RS099.rvs.fastq.gz	82725	0	70-282	52	3.03898	199.203
	RS100.fwd	RS100.fwd.fastq.gz	87331	0	70-278	51	2.9268	239.923
	RS100.rvs	RS100.rvs.fastq.gz	87331	0	70-282	52	2.93252	199.857
	RS101.fwd	RS101.fwd.fastq.gz	75593	0	70-279	51	3.33761	236.95
	RS101.rvs	RS101.rvs.fastq.gz	75593	0	70-280	53	3.08362	199.848
	RS102.fwd	RS102.fwd.fastq.gz	66736	0	70-278	51	3.9409	209.544
	RS102.rvs	RS102.rvs.fastq.gz	66736	0	70-280	53	3.12725	200.165
	RS103.fwd	RS103.fwd.fastq.gz	80874	0	70-279	49	3.22477	238.65
	RS103.rvs	RS103.rvs.fastq.gz	80874	0	70-280	51	3.00344	206.406
	RS104.fwd	RS104.fwd.fastq.gz	81338	0	70-278	52	3.40677	239.215
	RS104.rvs	RS104.rvs.fastq.gz	81338	0	70-280	53	3.34899	199.199
	RS105.fwd	RS105.fwd.fastq.gz	70333	0	70-279	53	2.80238	242.113
	RS105.rvs	RS105.rvs.fastq.gz	70333	0	70-281	55	2.89764	200.469
	RS106.fwd	RS106.fwd.fastq.gz	73703	0	70-280	51	3.18712	243.186
	RS106.rvs	RS106.rvs.fastq.gz	73703	0	70-282	53	3.12606	205.847
	RS107.fwd	RS107.fwd.fastq.gz	75841	0	70-280	50	3.33593	245.356
	RS107.rvs	RS107.rvs.fastq.gz	75841	0	70-281	51	3.32406	199.387
	RS108.fwd	RS108.fwd.fastq.gz	77638	0	70-280	51	3.16726	243.678
	RS108.rvs	RS108.rvs.fastq.gz	77638	0	70-284	53	3.07839	200.611
	RS109.fwd	RS109.fwd.fastq.gz	69236	0	70-279	51	3.3523	243.71
	RS109.rvs	RS109.rvs.fastq.gz	69236	0	70-281	52	3.16165	193.478
	RS110.fwd	RS110.fwd.fastq.gz	74039	0	70-279	50	3.54273	231.719
	RS110.rvs	RS110.rvs.fastq.gz	74039	0	70-280	52	3.0646	204.006
	RS111.fwd	RS111.fwd.fastq.gz	67052	0	70-279	52	3.34516	241.343
	RS111.rvs	RS111.rvs.fastq.gz	67052	0	70-281	54	3.32279	198.083
	RS112.fwd	RS112.fwd.fastq.gz	80664	0	70-279	51	3.10176	242.833
	RS112.rvs	RS112.rvs.fastq.gz	80664	0	70-280	52	2.89348	200.514
	RS113.fwd	RS113.fwd.fastq.gz	77497	0	70-278	52	3.02205	243.501
	RS113.rvs	RS113.rvs.fastq.gz	77497	0	70-281	53	2.85301	202.441
	RS114.fwd	RS114.fwd.fastq.gz	77324	0	70-280	52	3.26419	244.559
	RS114.rvs	RS114.rvs.fastq.gz	77324	0	70-282	53	3.32109	199.721
	RS115.fwd	RS115.fwd.fastq.gz	78366	0	70-279	52	3.33308	242.895
	RS115.rvs	RS115.rvs.fastq.gz	78366	0	70-282	53	3.19144	195.422
	RS116.fwd	RS116.fwd.fastq.gz	82574	0	70-278	51	3.11599	247.825
	RS116.rvs	RS116.rvs.fastq.gz	82574	0	70-282	52	3.15717	194.188
	RS117.fwd	RS117.fwd.fastq.gz	75548	0	70-281	51	3.3118	246.5
	RS117.rvs	RS117.rvs.fastq.gz	75548	0	70-282	52	3.16488	197.971
	RS118.fwd	RS118.fwd.fastq.gz	81367	0	70-281	50	3.07864	239.464
	RS118.rvs	RS118.rvs.fastq.gz	81367	0	70-282	52	2.97295	198.052
	RS119.fwd	RS119.fwd.fastq.gz	70444	0	70-281	52	3.19545	245.431
	RS119.rvs	RS119.rvs.fastq.gz	70444	0	70-282	54	3.2068	196.722
	RS120.fwd	RS120.fwd.fastq.gz	75998	0	70-281	52	3.13298	244.794
	RS120.rvs	RS120.rvs.fastq.gz	75998	0	70-281	54	3.25666	198.011
	RS121.fwd	RS121.fwd.fastq.gz	70776	0	70-281	52	3.47293	242.981
	RS121.rvs	RS121.rvs.fastq.gz	70776	0	70-281	54	3.28501	206.167
	RS122.fwd	RS122.fwd.fastq.gz	74588	0	70-279	51	3.30482	232.947
	RS122.rvs	RS122.rvs.fastq.gz	74588	0	70-280	53	2.9187	206.505
	RS123.fwd	RS123.fwd.fastq.gz	72745	0	70-280	54	3.11224	233.37
	RS123.rvs	RS123.rvs.fastq.gz	72745	0	70-281	55	3.14798	178.618
	RS124.fwd	RS124.fwd.fastq.gz	74408	0	70-281	53	3.11526	239.737
	RS124.rvs	RS124.rvs.fastq.gz	74408	0	70-281	54	2.97952	199.383
	RS125.fwd	RS125.fwd.fastq.gz	66653	0	70-278	50	3.19716	244.239
	RS125.rvs	RS125.rvs.fastq.gz	66653	0	70-281	51	3.17915	179.215
	RS126.fwd	RS126.fwd.fastq.gz	74180	0	70-278	52	3.38097	232.073
	RS126.rvs	RS126.rvs.fastq.gz	74180	0	70-279	53	2.91858	204.726
	RS127.fwd	RS127.fwd.fastq.gz	64701	0	70-279	51	3.89793	223.044
	RS127.rvs	RS127.rvs.fastq.gz	64701	0	70-281	52	3.13906	196.792
	RS128.fwd	RS128.fwd.fastq.gz	71603	0	70-278	51	3.59063	234.102
	RS128.rvs	RS128.rvs.fastq.gz	71603	0	70-280	53	3.41466	187.33
	RS129.fwd	RS129.fwd.fastq.gz	71558	0	70-280	51	3.56354	238.787
	RS129.rvs	RS129.rvs.fastq.gz	71558	0	70-280	53	3.33436	204.518
	RS130.fwd	RS130.fwd.fastq.gz	77629	0	70-281	52	3.2359	236.867
	RS130.rvs	RS130.rvs.fastq.gz	77629	0	70-281	54	3.10837	202.042
	RS131.fwd	RS131.fwd.fastq.gz	72138	0	70-279	52	3.27982	239.602
	RS131.rvs	RS131.rvs.fastq.gz	72138	0	70-282	54	3.23685	194.388
	RS132.fwd	RS132.fwd.fastq.gz	74981	0	70-282	51	3.02077	242.946
	RS132.rvs	RS132.rvs.fastq.gz	74981	0	70-281	53	2.9074	198.721
	RS133.fwd	RS133.fwd.fastq.gz	64656	0	70-279	53	3.7599	234.666
	RS133.rvs	RS133.rvs.fastq.gz	64656	0	70-279	55	3.50316	193.803
	RS134.fwd	RS134.fwd.fastq.gz	63637	0	70-280	51	4.17524	217.841
	RS134.rvs	RS134.rvs.fastq.gz	63637	0	70-281	52	3.33454	200.902
	RS135.fwd	RS135.fwd.fastq.gz	75896	0	70-280	51	3.43233	237.944
	RS135.rvs	RS135.rvs.fastq.gz	75896	0	70-280	52	3.13982	201.672
	RS136.fwd	RS136.fwd.fastq.gz	76179	0	70-280	52	3.27518	240.163
	RS136.rvs	RS136.rvs.fastq.gz	76179	0	70-280	53	3.16754	197.837
	RS137.fwd	RS137.fwd.fastq.gz	70897	0	70-278	51	3.51637	241.232
	RS137.rvs	RS137.rvs.fastq.gz	70897	0	70-281	53	3.29774	203.736
	RS138.fwd	RS138.fwd.fastq.gz	76891	0	70-282	50	3.3645	238.39
	RS138.rvs	RS138.rvs.fastq.gz	76891	0	70-282	51	3.01336	208.269
	RS139.fwd	RS139.fwd.fastq.gz	74781	0	70-281	53	3.22408	236.945
	RS139.rvs	RS139.rvs.fastq.gz	74781	0	70-282	55	2.93256	199.571
	RS140.fwd	RS140.fwd.fastq.gz	70524	0	70-280	52	3.41444	238.792
	RS140.rvs	RS140.rvs.fastq.gz	70524	0	70-280	54	3.26272	203.104
	RS141.fwd	RS141.fwd.fastq.gz	69460	0	70-279	51	3.64238	231.78
	RS141.rvs	RS141.rvs.fastq.gz	69460	0	70-280	52	3.06939	201.04
	RS142.fwd	RS142.fwd.fastq.gz	69169	0	70-281	51	3.59265	226.233
	RS142.rvs	RS142.rvs.fastq.gz	69169	0	70-281	53	2.96376	210.145
	RS143.fwd	RS143.fwd.fastq.gz	76445	0	70-278	51	3.32919	238.628
	RS143.rvs	RS143.rvs.fastq.gz	76445	0	70-283	52	3.0244	204.724
	RS144.fwd	RS144.fwd.fastq.gz	83582	0	70-279	51	2.68	239.944
	RS144.rvs	RS144.rvs.fastq.gz	83582	0	70-284	53	2.57472	205.757
	RS145.fwd	RS145.fwd.fastq.gz	58062	0	70-278	52	3.57549	230.29
	RS145.rvs	RS145.rvs.fastq.gz	58062	0	70-282	54	3.23103	204.254
	RS146.fwd	RS146.fwd.fastq.gz	65365	0	70-279	51	3.5493	236.064
	RS146.rvs	RS146.rvs.fastq.gz	65365	0	70-280	52	3.26627	202.129
	RS147.fwd	RS147.fwd.fastq.gz	67128	0	70-280	51	3.45161	243.231
	RS147.rvs	RS147.rvs.fastq.gz	67128	0	70-281	53	3.2371	200.202
	RS148.fwd	RS148.fwd.fastq.gz	64258	0	70-279	52	3.41436	242.17
	RS148.rvs	RS148.rvs.fastq.gz	64258	0	70-280	53	3.35367	199.452
	RS149.fwd	RS149.fwd.fastq.gz	62118	0	70-282	52	3.57867	241.96
	RS149.rvs	RS149.rvs.fastq.gz	62118	0	70-280	54	3.57706	197.107
	RS150.fwd	RS150.fwd.fastq.gz	59214	0	70-279	52	3.51099	228.098
	RS150.rvs	RS150.rvs.fastq.gz	59214	0	70-280	53	3.12933	194.428
	RS151.fwd	RS151.fwd.fastq.gz	70932	0	70-281	52	3.28625	241.546
	RS151.rvs	RS151.rvs.fastq.gz	70932	0	70-282	54	3.1072	202.968
	RS152.fwd	RS152.fwd.fastq.gz	71992	0	70-279	51	3.35593	238.133
	RS152.rvs	RS152.rvs.fastq.gz	71992	0	70-280	53	3.17396	200.11
	RS153.fwd	RS153.fwd.fastq.gz	70904	0	70-278	51	3.79668	226.231
	RS153.rvs	RS153.rvs.fastq.gz	70904	0	70-282	52	3.29883	205.876
	RS154.fwd	RS154.fwd.fastq.gz	82394	0	70-279	52	3.07668	232.851
	RS154.rvs	RS154.rvs.fastq.gz	82394	0	70-281	54	3.00022	196.983
	RS155.fwd	RS155.fwd.fastq.gz	73998	0	70-279	52	3.44874	241.899
	RS155.rvs	RS155.rvs.fastq.gz	73998	0	70-282	54	3.36766	198.264
	RS156.fwd	RS156.fwd.fastq.gz	80665	0	70-281	51	3.40792	241.694
	RS156.rvs	RS156.rvs.fastq.gz	80665	0	70-282	52	3.14759	199.171
	RS157.fwd	RS157.fwd.fastq.gz	70901	0	70-286	52	3.39346	237.949
	RS157.rvs	RS157.rvs.fastq.gz	70901	0	70-280	53	3.24255	197.755
	RS158.fwd	RS158.fwd.fastq.gz	72396	0	70-280	52	3.67838	229.354
	RS158.rvs	RS158.rvs.fastq.gz	72396	0	70-283	53	3.15073	200.961
	RS159.fwd	RS159.fwd.fastq.gz	78764	0	70-280	53	3.10675	236.934
	RS159.rvs	RS159.rvs.fastq.gz	78764	0	70-282	55	2.77284	200.02
	RS160.fwd	RS160.fwd.fastq.gz	78984	0	70-280	51	3.10189	239.948
	RS160.rvs	RS160.rvs.fastq.gz	78984	0	70-280	53	3.03353	200.677
	RS161.fwd	RS161.fwd.fastq.gz	80450	0	70-280	51	3.3959	241.116
	RS161.rvs	RS161.rvs.fastq.gz	80450	0	70-280	52	3.09882	204.728
	RS162.fwd	RS162.fwd.fastq.gz	91553	0	70-278	55	2.44012	230.514
	RS162.rvs	RS162.rvs.fastq.gz	91553	0	70-280	56	2.23368	206.019
	RS163.fwd	RS163.fwd.fastq.gz	78132	0	70-278	50	3.13444	246.532
	RS163.rvs	RS163.rvs.fastq.gz	78132	0	70-280	51	2.99621	204.562
	RS164.fwd	RS164.fwd.fastq.gz	78322	0	70-280	52	3.46518	235.219
	RS164.rvs	RS164.rvs.fastq.gz	78322	0	70-281	54	3.09364	199.229
	RS165.fwd	RS165.fwd.fastq.gz	67579	0	70-279	52	3.42414	241.94
	RS165.rvs	RS165.rvs.fastq.gz	67579	0	70-280	54	3.33832	194.855
	RS166.fwd	RS166.fwd.fastq.gz	78116	0	70-279	52	3.55113	222.698
	RS166.rvs	RS166.rvs.fastq.gz	78116	0	70-280	53	2.98274	202.936
	RS167.fwd	RS167.fwd.fastq.gz	77343	0	70-278	51	3.66032	228.58
	RS167.rvs	RS167.rvs.fastq.gz	77343	0	70-280	52	3.21555	203.457
	RS168.fwd	RS168.fwd.fastq.gz	82157	0	70-278	51	3.26448	237.12
	RS168.rvs	RS168.rvs.fastq.gz	82157	0	70-284	52	3.08677	201.045
	RS169.fwd	RS169.fwd.fastq.gz	74943	0	70-280	51	3.22645	238.834
	RS169.rvs	RS169.rvs.fastq.gz	74943	0	70-280	52	2.91155	204.739
	RS170.fwd	RS170.fwd.fastq.gz	80355	0	70-278	52	3.32276	237.417
	RS170.rvs	RS170.rvs.fastq.gz	80355	0	70-282	53	3.00044	204.453
	RS171.fwd	RS171.fwd.fastq.gz	77168	0	70-280	52	3.22673	241.424
	RS171.rvs	RS171.rvs.fastq.gz	77168	0	70-280	53	3.04271	200.63
	RS172.fwd	RS172.fwd.fastq.gz	77455	0	70-278	53	3.04822	239.355
	RS172.rvs	RS172.rvs.fastq.gz	77455	0	70-285	55	2.98109	198.091
	RS173.fwd	RS173.fwd.fastq.gz	63755	0	70-281	51	3.56678	236.553
	RS173.rvs	RS173.rvs.fastq.gz	63755	0	70-281	53	3.43502	199.028
	RS174.fwd	RS174.fwd.fastq.gz	72814	0	70-279	51	3.51581	228.134
	RS174.rvs	RS174.rvs.fastq.gz	72814	0	70-280	53	3.03101	206.249
	RS175.fwd	RS175.fwd.fastq.gz	75444	0	70-280	51	3.23684	241.148
	RS175.rvs	RS175.rvs.fastq.gz	75444	0	70-281	52	3.2037	205.222
	RS176.fwd	RS176.fwd.fastq.gz	77307	0	70-286	52	2.97515	241.262
	RS176.rvs	RS176.rvs.fastq.gz	77307	0	70-281	54	2.96739	200.605
	RS177.fwd	RS177.fwd.fastq.gz	80951	0	70-280	50	3.21429	245.096
	RS177.rvs	RS177.rvs.fastq.gz	80951	0	70-283	51	3.0747	198.042
	RS178.fwd	RS178.fwd.fastq.gz	79570	0	70-280	52	3.14063	243.062
	RS178.rvs	RS178.rvs.fastq.gz	79570	0	70-281	53	3.03758	199.34
	RS179.fwd	RS179.fwd.fastq.gz	79437	0	70-280	51	3.22772	245.903
	RS179.rvs	RS179.rvs.fastq.gz	79437	0	70-280	52	3.22394	198.858
	RS180.fwd	RS180.fwd.fastq.gz	73672	0	70-281	51	3.16267	243.701
	RS180.rvs	RS180.rvs.fastq.gz	73672	0	70-281	52	3.08801	198.521
	RS181.fwd	RS181.fwd.fastq.gz	84874	0	70-278	53	3.09282	245.15
	RS181.rvs	RS181.rvs.fastq.gz	84874	0	70-280	54	3.15291	199.858
	RS182.fwd	RS182.fwd.fastq.gz	83061	0	70-280	52	2.81119	243.018
	RS182.rvs	RS182.rvs.fastq.gz	83061	0	70-280	54	2.90991	200.474
	RS183.fwd	RS183.fwd.fastq.gz	80253	0	70-279	51	3.1463	229.864
	RS183.rvs	RS183.rvs.fastq.gz	80253	0	70-280	52	2.87092	197.655
	RS184.fwd	RS184.fwd.fastq.gz	72353	0	70-278	52	3.33089	244.714
	RS184.rvs	RS184.rvs.fastq.gz	72353	0	70-280	54	3.30187	195.584
	RS185.fwd	RS185.fwd.fastq.gz	60361	0	70-277	51	3.81041	240.137
	RS185.rvs	RS185.rvs.fastq.gz	60361	0	70-281	52	3.59338	205.552
	RS186.fwd	RS186.fwd.fastq.gz	85300	0	70-280	52	3.05862	241.824
	RS186.rvs	RS186.rvs.fastq.gz	85300	0	70-281	54	2.78077	205.427
	RS187.fwd	RS187.fwd.fastq.gz	69075	0	70-279	52	2.97937	245.417
	RS187.rvs	RS187.rvs.fastq.gz	69075	0	70-281	54	3.18639	189.742
	RS188.fwd	RS188.fwd.fastq.gz	64890	0	70-280	51	3.35337	242.438
	RS188.rvs	RS188.rvs.fastq.gz	64890	0	70-280	52	3.30251	204.636
	RS189.fwd	RS189.fwd.fastq.gz	78554	0	70-278	51	3.35438	244.287
	RS189.rvs	RS189.rvs.fastq.gz	78554	0	70-280	53	3.10869	204.229
	RS190.fwd	RS190.fwd.fastq.gz	84457	0	70-280	51	3.06665	244.128
	RS190.rvs	RS190.rvs.fastq.gz	84457	0	70-280	53	2.92338	202.274
	RS191.fwd	RS191.fwd.fastq.gz	72585	0	70-280	53	3.0392	231.142
	RS191.rvs	RS191.rvs.fastq.gz	72585	0	70-280	54	2.73335	203.754
	RS192.fwd	RS192.fwd.fastq.gz	79963	0	70-281	52	3.34655	240.996
	RS192.rvs	RS192.rvs.fastq.gz	79963	0	70-280	54	3.17272	203.564
	RS193.fwd	RS193.fwd.fastq.gz	67095	0	70-280	51	3.50846	239.384
	RS193.rvs	RS193.rvs.fastq.gz	67095	0	70-280	53	3.59192	174.664
	RS194.fwd	RS194.fwd.fastq.gz	73895	0	70-281	52	3.47655	225.802
	RS194.rvs	RS194.rvs.fastq.gz	73895	0	70-281	54	2.87435	200.914
	RS195.fwd	RS195.fwd.fastq.gz	67283	0	70-278	52	3.49122	232.226
	RS195.rvs	RS195.rvs.fastq.gz	67283	0	70-280	54	3.32922	191.93
	RS196.fwd	RS196.fwd.fastq.gz	68022	0	70-280	51	3.27541	240.968
	RS196.rvs	RS196.rvs.fastq.gz	68022	0	70-282	52	3.13428	199.872
	RS197.fwd	RS197.fwd.fastq.gz	80052	0	70-280	52	2.98431	240.245
	RS197.rvs	RS197.rvs.fastq.gz	80052	0	70-281	53	3.06051	198.504
	RS198.fwd	RS198.fwd.fastq.gz	75504	0	70-279	52	3.52564	238.594
	RS198.rvs	RS198.rvs.fastq.gz	75504	0	70-280	53	3.39055	196.257
	RS199.fwd	RS199.fwd.fastq.gz	71566	0	70-279	50	3.42621	236.425
	RS199.rvs	RS199.rvs.fastq.gz	71566	0	70-282	51	3.19984	199.379
	RS200.fwd	RS200.fwd.fastq.gz	70968	0	70-282	52	3.44099	240.684
	RS200.rvs	RS200.rvs.fastq.gz	70968	0	70-281	54	3.30994	198.841
	RS201.fwd	RS201.fwd.fastq.gz	74207	0	70-278	52	3.45116	237.409
	RS201.rvs	RS201.rvs.fastq.gz	74207	0	70-282	53	3.10348	201.735
	RS202.fwd	RS202.fwd.fastq.gz	79069	0	70-278	51	3.3768	233.261
	RS202.rvs	RS202.rvs.fastq.gz	79069	0	70-282	52	3.04038	208.116
	RS203.fwd	RS203.fwd.fastq.gz	67103	0	70-278	52	3.68538	227.861
	RS203.rvs	RS203.rvs.fastq.gz	67103	0	70-281	53	3.07289	205.935
	RS204.fwd	RS204.fwd.fastq.gz	74616	0	70-281	53	3.28214	234.55
	RS204.rvs	RS204.rvs.fastq.gz	74616	0	70-282	54	3.0342	200.713
	RS205.fwd	RS205.fwd.fastq.gz	82674	0	70-279	52	3.27673	239.977
	RS205.rvs	RS205.rvs.fastq.gz	82674	0	70-281	53	2.87394	204.251
	RS206.fwd	RS206.fwd.fastq.gz	73327	0	70-279	50	3.25392	239.694
	RS206.rvs	RS206.rvs.fastq.gz	73327	0	70-280	51	3.02072	204.882
	RS207.fwd	RS207.fwd.fastq.gz	75952	0	70-278	51	3.59701	231.936
	RS207.rvs	RS207.rvs.fastq.gz	75952	0	70-282	52	3.24547	206.724
	RS208.fwd	RS208.fwd.fastq.gz	79352	0	70-280	51	3.4076	237.58
	RS208.rvs	RS208.rvs.fastq.gz	79352	0	70-283	52	3.15556	204.7
	RO001.fwd	RO001.fwd.fastq.gz	60076	0	70-278	50	1.95419	242.384
	RO001.rvs	RO001.rvs.fastq.gz	60076	0	70-280	51	2.15227	186.368
	RO002.fwd	RO002.fwd.fastq.gz	63161	0	70-280	51	2.46355	235.1
	RO002.rvs	RO002.rvs.fastq.gz	63161	0	70-280	53	2.43346	202.295
	RO003.fwd	RO003.fwd.fastq.gz	63272	0	70-279	49	2.00089	234.49
	RO003.rvs	RO003.rvs.fastq.gz	63272	0	70-279	50	2.01827	209.566
	RO004.fwd	RO004.fwd.fastq.gz	59729	0	70-278	52	2.4494	236.809
	RO004.rvs	RO004.rvs.fastq.gz	59729	0	70-281	53	2.50465	195.295
	RO005.fwd	RO005.fwd.fastq.gz	66856	0	70-278	54	1.98486	238.6
	RO005.rvs	RO005.rvs.fastq.gz	66856	0	70-279	56	2.19876	193.817
	RO006.fwd	RO006.fwd.fastq.gz	66266	0	70-280	54	2.49902	233.905
	RO006.rvs	RO006.rvs.fastq.gz	66266	0	70-282	56	2.70576	193.377
	RO007.fwd	RO007.fwd.fastq.gz	49711	0	70-280	46	2.43005	230.042
	RO007.rvs	RO007.rvs.fastq.gz	49711	0	70-283	49	2.28722	189.545
	RO008.fwd	RO008.fwd.fastq.gz	61820	0	70-279	50	1.83112	237.935
	RO008.rvs	RO008.rvs.fastq.gz	61820	0	70-281	51	1.83759	205.7
	RO009.fwd	RO009.fwd.fastq.gz	63166	0	70-278	51	1.41215	238.08
	RO009.rvs	RO009.rvs.fastq.gz	63166	0	70-279	53	1.50556	205.579
	RO010.fwd	RO010.fwd.fastq.gz	66734	0	70-277	50	1.67081	237.735
	RO010.rvs	RO010.rvs.fastq.gz	66734	0	70-280	52	1.77121	205.11
	RO011.fwd	RO011.fwd.fastq.gz	61180	0	70-278	54	2.17718	238.965
	RO011.rvs	RO011.rvs.fastq.gz	61180	0	70-280	55	2.54495	194.049
	RO012.fwd	RO012.fwd.fastq.gz	55932	0	70-279	51	2.13116	238.455
	RO012.rvs	RO012.rvs.fastq.gz	55932	0	70-281	52	2.18837	198.092
	RO013.fwd	RO013.fwd.fastq.gz	59690	0	70-279	53	1.98526	238.132
	RO013.rvs	RO013.rvs.fastq.gz	59690	0	70-279	55	2.20975	194.846
	RO014.fwd	RO014.fwd.fastq.gz	64040	0	70-279	55	2.33604	238.329
	RO014.rvs	RO014.rvs.fastq.gz	64040	0	70-283	57	2.52342	190.653
	RO015.fwd	RO015.fwd.fastq.gz	68289	0	70-278	55	2.36348	233.931
	RO015.rvs	RO015.rvs.fastq.gz	68289	0	70-279	56	2.35177	191.78
	RO016.fwd	RO016.fwd.fastq.gz	56555	0	70-282	55	2.06701	236.467
	RO016.rvs	RO016.rvs.fastq.gz	56555	0	70-280	56	2.28981	194.357
	RO017.fwd	RO017.fwd.fastq.gz	66063	0	70-280	53	1.67719	243.131
	RO017.rvs	RO017.rvs.fastq.gz	66063	0	70-282	56	1.82856	186.248
	RO018.fwd	RO018.fwd.fastq.gz	65886	0	70-278	51	1.98525	238.818
	RO018.rvs	RO018.rvs.fastq.gz	65886	0	70-281	54	2.17193	195.395
	RO019.fwd	RO019.fwd.fastq.gz	60121	0	70-280	55	1.64003	250.216
	RO019.rvs	RO019.rvs.fastq.gz	60121	0	70-282	57	1.71155	190.517
	RO020.fwd	RO020.fwd.fastq.gz	53445	0	70-279	49	2.05445	250.798
	RO020.rvs	RO020.rvs.fastq.gz	53445	0	70-280	51	2.16484	194.287
	RO021.fwd	RO021.fwd.fastq.gz	64184	0	70-278	52	2.37442	243.239
	RO021.rvs	RO021.rvs.fastq.gz	64184	0	70-281	54	2.39312	192.21
	RO022.fwd	RO022.fwd.fastq.gz	65243	0	70-279	48	1.50208	253.527
	RO022.rvs	RO022.rvs.fastq.gz	65243	0	70-281	50	1.51587	206.493
	RO023.fwd	RO023.fwd.fastq.gz	56998	0	70-279	51	2.63343	225.063
	RO023.rvs	RO023.rvs.fastq.gz	56998	0	70-281	53	2.42289	187.309
	RO024.fwd	RO024.fwd.fastq.gz	62627	0	70-278	53	2.37118	241.004
	RO024.rvs	RO024.rvs.fastq.gz	62627	0	70-282	54	2.57876	194.168
	RO025.fwd	RO025.fwd.fastq.gz	48410	0	70-279	49	2.43751	237.27
	RO025.rvs	RO025.rvs.fastq.gz	48410	0	70-280	50	2.36935	205.996
	RO026.fwd	RO026.fwd.fastq.gz	54474	0	70-279	51	1.88714	241.973
	RO026.rvs	RO026.rvs.fastq.gz	54474	0	70-280	54	1.9881	203.665
	RO027.fwd	RO027.fwd.fastq.gz	64244	0	70-279	50	2.60725	216.287
	RO027.rvs	RO027.rvs.fastq.gz	64244	0	70-283	52	2.28659	204.117
	RO028.fwd	RO028.fwd.fastq.gz	51202	0	70-277	55	2.4335	235.8
	RO028.rvs	RO028.rvs.fastq.gz	51202	0	70-279	57	2.57802	191.052
	RO029.fwd	RO029.fwd.fastq.gz	57341	0	70-280	52	2.26888	239.156
	RO029.rvs	RO029.rvs.fastq.gz	57341	0	70-280	52	2.42584	198.267
	RO030.fwd	RO030.fwd.fastq.gz	53811	0	70-277	53	2.3025	237.243
	RO030.rvs	RO030.rvs.fastq.gz	53811	0	70-280	54	2.3471	195.403
	RO031.fwd	RO031.fwd.fastq.gz	51848	0	70-278	51	1.90171	235.692
	RO031.rvs	RO031.rvs.fastq.gz	51848	0	70-280	53	2.1023	203.174
	RO032.fwd	RO032.fwd.fastq.gz	51260	0	70-278	58	2.66875	232.663
	RO032.rvs	RO032.rvs.fastq.gz	51260	0	70-279	60	2.61998	187.365
	RO033.fwd	RO033.fwd.fastq.gz	54684	0	70-280	52	2.28403	235.203
	RO033.rvs	RO033.rvs.fastq.gz	54684	0	70-282	54	2.44861	198.615
	RO034.fwd	RO034.fwd.fastq.gz	67647	0	70-281	53	1.84044	239.331
	RO034.rvs	RO034.rvs.fastq.gz	67647	0	70-282	55	1.82861	204.713
	RO035.fwd	RO035.fwd.fastq.gz	51753	0	70-279	50	2.06751	251.392
	RO035.rvs	RO035.rvs.fastq.gz	51753	0	70-281	52	2.19311	189.93
	RO036.fwd	RO036.fwd.fastq.gz	52188	0	70-279	54	2.32429	237.165
	RO036.rvs	RO036.rvs.fastq.gz	52188	0	70-280	56	2.54273	193.282
	RO037.fwd	RO037.fwd.fastq.gz	63609	0	70-277	55	2.34715	239.854
	RO037.rvs	RO037.rvs.fastq.gz	63609	0	70-282	57	2.33929	195.651
	RO038.fwd	RO038.fwd.fastq.gz	71031	0	70-278	50	2.13146	242.113
	RO038.rvs	RO038.rvs.fastq.gz	71031	0	70-282	51	2.27929	204.052
	RO039.fwd	RO039.fwd.fastq.gz	57816	0	70-278	50	2.39034	233.624
	RO039.rvs	RO039.rvs.fastq.gz	57816	0	70-280	51	2.35402	206.244
	RO040.fwd	RO040.fwd.fastq.gz	58669	0	70-281	53	2.32832	240.195
	RO040.rvs	RO040.rvs.fastq.gz	58669	0	70-281	55	2.4357	193.775
	RO041.fwd	RO041.fwd.fastq.gz	54061	0	70-281	50	2.27521	238.124
	RO041.rvs	RO041.rvs.fastq.gz	54061	0	70-282	52	2.47128	174.327
	RO042.fwd	RO042.fwd.fastq.gz	58363	0	70-278	47	1.73398	233.792
	RO042.rvs	RO042.rvs.fastq.gz	58363	0	70-282	48	1.58834	213.048
	RO043.fwd	RO043.fwd.fastq.gz	58773	0	70-281	52	2.48924	234.132
	RO043.rvs	RO043.rvs.fastq.gz	58773	0	70-283	53	2.50966	191.828
	RO044.fwd	RO044.fwd.fastq.gz	55382	0	70-281	52	2.48817	233.878
	RO044.rvs	RO044.rvs.fastq.gz	55382	0	70-282	54	2.70124	192.885
	RO045.fwd	RO045.fwd.fastq.gz	62718	0	70-281	51	2.13655	243.62
	RO045.rvs	RO045.rvs.fastq.gz	62718	0	70-282	53	2.19235	199.156
	RO046.fwd	RO046.fwd.fastq.gz	65330	0	70-281	57	2.1644	228.698
	RO046.rvs	RO046.rvs.fastq.gz	65330	0	70-282	58	2.29757	184.081
	RO047.fwd	RO047.fwd.fastq.gz	61889	0	70-281	54	2.26696	227.706
	RO047.rvs	RO047.rvs.fastq.gz	61889	0	70-282	55	2.24596	193.39
	RO048.fwd	RO048.fwd.fastq.gz	58511	0	70-281	53	2.58755	235.57
	RO048.rvs	RO048.rvs.fastq.gz	58511	0	70-283	55	2.66617	189.401
	RO049.fwd	RO049.fwd.fastq.gz	62534	0	70-281	57	2.25797	232.217
	RO049.rvs	RO049.rvs.fastq.gz	62534	0	70-282	59	2.14923	193.981
	RO050.fwd	RO050.fwd.fastq.gz	59977	0	70-281	52	2.01077	234.059
	RO050.rvs	RO050.rvs.fastq.gz	59977	0	70-283	54	1.96909	205.872
	RO051.fwd	RO051.fwd.fastq.gz	54588	0	70-281	51	2.02425	234.019
	RO051.rvs	RO051.rvs.fastq.gz	54588	0	70-282	53	1.87587	202.127
	RO052.fwd	RO052.fwd.fastq.gz	60152	0	70-281	54	2.15288	229.514
	RO052.rvs	RO052.rvs.fastq.gz	60152	0	70-282	56	2.16784	192.167
	RO053.fwd	RO053.fwd.fastq.gz	69122	0	70-281	52	1.99792	233.478
	RO053.rvs	RO053.rvs.fastq.gz	69122	0	70-282	53	1.96898	202.028
	RO054.fwd	RO054.fwd.fastq.gz	58416	0	70-281	50	2.40859	235.794
	RO054.rvs	RO054.rvs.fastq.gz	58416	0	70-282	52	2.3521	203.408
	RO055.fwd	RO055.fwd.fastq.gz	62608	0	70-281	51	1.91829	228.557
	RO055.rvs	RO055.rvs.fastq.gz	62608	0	70-283	52	1.72342	205.613
	RO056.fwd	RO056.fwd.fastq.gz	57773	0	70-281	49	2.25365	238.86
	RO056.rvs	RO056.rvs.fastq.gz	57773	0	70-282	51	2.2675	206.215
	RO057.fwd	RO057.fwd.fastq.gz	61161	0	70-281	51	2.18767	241.638
	RO057.rvs	RO057.rvs.fastq.gz	61161	0	70-282	52	2.12063	201.72
	RO058.fwd	RO058.fwd.fastq.gz	79132	0	70-281	51	2.13188	237.786
	RO058.rvs	RO058.rvs.fastq.gz	79132	0	70-282	53	1.98529	202.542
	RO059.fwd	RO059.fwd.fastq.gz	63289	0	70-283	52	1.99877	236.703
	RO059.rvs	RO059.rvs.fastq.gz	63289	0	70-282	53	1.98455	197.861
	RO060.fwd	RO060.fwd.fastq.gz	62143	0	70-281	52	2.13701	244.604
	RO060.rvs	RO060.rvs.fastq.gz	62143	0	70-282	54	2.24965	193.762
	RO061.fwd	RO061.fwd.fastq.gz	59156	0	70-280	53	2.08601	238.368
	RO061.rvs	RO061.rvs.fastq.gz	59156	0	70-283	55	2.15363	191.677
	RO062.fwd	RO062.fwd.fastq.gz	59490	0	70-281	56	2.11464	236.187
	RO062.rvs	RO062.rvs.fastq.gz	59490	0	70-283	58	2.22558	182.624
	RO063.fwd	RO063.fwd.fastq.gz	58811	0	70-281	50	2.03703	235.776
	RO063.rvs	RO063.rvs.fastq.gz	58811	0	70-282	51	1.99112	198.981
	RO064.fwd	RO064.fwd.fastq.gz	59447	0	70-281	51	2.30121	244.006
	RO064.rvs	RO064.rvs.fastq.gz	59447	0	70-282	52	2.53503	197.456
	RO065.fwd	RO065.fwd.fastq.gz	60172	0	70-281	51	2.23692	239.253
	RO065.rvs	RO065.rvs.fastq.gz	60172	0	70-282	52	2.12724	199.314
	RO066.fwd	RO066.fwd.fastq.gz	62758	0	70-281	49	2.2276	234.129
	RO066.rvs	RO066.rvs.fastq.gz	62758	0	70-282	50	2.132	207.035
	RO067.fwd	RO067.fwd.fastq.gz	55933	0	70-284	47	2.15436	240.29
	RO067.rvs	RO067.rvs.fastq.gz	55933	0	70-282	49	2.42254	205.031
	RO068.fwd	RO068.fwd.fastq.gz	54550	0	70-281	50	2.08433	243.505
	RO068.rvs	RO068.rvs.fastq.gz	54550	0	70-282	51	2.24931	197.479
	RO069.fwd	RO069.fwd.fastq.gz	62675	0	70-281	51	2.00399	243.165
	RO069.rvs	RO069.rvs.fastq.gz	62675	0	70-282	52	2.08855	202.148
	RO070.fwd	RO070.fwd.fastq.gz	66760	0	70-281	52	2.23936	235.053
	RO070.rvs	RO070.rvs.fastq.gz	66760	0	70-282	54	2.37268	195.48
	RO071.fwd	RO071.fwd.fastq.gz	61429	0	70-281	51	2.29696	237.387
	RO071.rvs	RO071.rvs.fastq.gz	61429	0	70-282	53	2.36045	198.821
	RO072.fwd	RO072.fwd.fastq.gz	55769	0	70-280	51	2.03877	243.383
	RO072.rvs	RO072.rvs.fastq.gz	55769	0	70-282	52	2.1858	201.623
	RO073.fwd	RO073.fwd.fastq.gz	64624	0	70-280	54	2.11996	242.208
	RO073.rvs	RO073.rvs.fastq.gz	64624	0	70-282	57	2.09365	193.002
	RO074.fwd	RO074.fwd.fastq.gz	65356	0	70-281	50	2.06714	241.468
	RO074.rvs	RO074.rvs.fastq.gz	65356	0	70-282	52	1.99676	205.191
	RO075.fwd	RO075.fwd.fastq.gz	60667	0	70-281	51	2.60768	240.373
	RO075.rvs	RO075.rvs.fastq.gz	60667	0	70-282	53	2.64394	192.495
	RO076.fwd	RO076.fwd.fastq.gz	55906	0	70-281	53	2.20549	244.349
	RO076.rvs	RO076.rvs.fastq.gz	55906	0	70-282	55	2.16256	189.945
	RO077.fwd	RO077.fwd.fastq.gz	67218	0	70-281	50	2.19435	247.469
	RO077.rvs	RO077.rvs.fastq.gz	67218	0	70-283	51	2.41751	202.15
	RO078.fwd	RO078.fwd.fastq.gz	67614	0	70-281	56	2.17706	232.044
	RO078.rvs	RO078.rvs.fastq.gz	67614	0	70-282	59	2.39152	184.126
	RO079.fwd	RO079.fwd.fastq.gz	66579	0	70-281	53	2.35059	238.032
	RO079.rvs	RO079.rvs.fastq.gz	66579	0	70-282	54	2.39114	196.423
	RO080.fwd	RO080.fwd.fastq.gz	62871	0	70-281	51	2.17429	241.079
	RO080.rvs	RO080.rvs.fastq.gz	62871	0	70-282	53	2.19656	194.043
	RO081.fwd	RO081.fwd.fastq.gz	60623	0	70-280	50	2.19554	239.927
	RO081.rvs	RO081.rvs.fastq.gz	60623	0	70-282	51	2.18069	204.973
	RO082.fwd	RO082.fwd.fastq.gz	64274	0	70-280	52	2.07393	226.075
	RO082.rvs	RO082.rvs.fastq.gz	64274	0	70-285	53	1.82811	205.816
	RO083.fwd	RO083.fwd.fastq.gz	65091	0	70-281	55	2.44734	236.688
	RO083.rvs	RO083.rvs.fastq.gz	65091	0	70-282	57	2.51801	188.608
	RO084.fwd	RO084.fwd.fastq.gz	67013	0	70-281	50	2.3294	231.377
	RO084.rvs	RO084.rvs.fastq.gz	67013	0	70-282	52	2.1757	196.727
	RO085.fwd	RO085.fwd.fastq.gz	67782	0	70-281	49	1.76005	249.817
	RO085.rvs	RO085.rvs.fastq.gz	67782	0	70-282	50	1.8589	209.389
	RO086.fwd	RO086.fwd.fastq.gz	62054	0	70-281	52	2.19486	238.12
	RO086.rvs	RO086.rvs.fastq.gz	62054	0	70-282	53	2.03855	199.788
	RO087.fwd	RO087.fwd.fastq.gz	53706	0	70-281	53	2.65333	213.1
	RO087.rvs	RO087.rvs.fastq.gz	53706	0	70-282	54	2.29397	202.416
	RO088.fwd	RO088.fwd.fastq.gz	55689	0	70-281	53	2.51576	223.584
	RO088.rvs	RO088.rvs.fastq.gz	55689	0	70-282	56	2.37031	185.82
	RO089.fwd	RO089.fwd.fastq.gz	59497	0	70-281	47	1.70261	246.502
	RO089.rvs	RO089.rvs.fastq.gz	59497	0	70-282	49	1.93119	211.844
	RO090.fwd	RO090.fwd.fastq.gz	63262	0	70-281	50	1.99488	237.7
	RO090.rvs	RO090.rvs.fastq.gz	63262	0	70-283	52	2.14505	203.747
	RO091.fwd	RO091.fwd.fastq.gz	55688	0	70-281	51	2.10458	238.259
	RO091.rvs	RO091.rvs.fastq.gz	55688	0	70-282	53	2.03096	199.449
	RO092.fwd	RO092.fwd.fastq.gz	55808	0	70-281	51	2.35629	244.337
	RO092.rvs	RO092.rvs.fastq.gz	55808	0	70-282	53	2.33121	192.499
	RO093.fwd	RO093.fwd.fastq.gz	64424	0	70-280	56	2.28486	237.63
	RO093.rvs	RO093.rvs.fastq.gz	64424	0	70-282	58	2.4882	192.476
	RO094.fwd	RO094.fwd.fastq.gz	62401	0	70-281	52	2.22112	240.903
	RO094.rvs	RO094.rvs.fastq.gz	62401	0	70-282	54	2.31086	195.918
	RO095.fwd	RO095.fwd.fastq.gz	65712	0	70-281	52	2.11073	233.52
	RO095.rvs	RO095.rvs.fastq.gz	65712	0	70-282	53	2.13964	200.451
	RO096.fwd	RO096.fwd.fastq.gz	59097	0	70-281	55	2.71418	235.446
	RO096.rvs	RO096.rvs.fastq.gz	59097	0	70-282	57	2.77341	193.513
	RO097.fwd	RO097.fwd.fastq.gz	62822	0	70-281	56	2.48957	234.506
	RO097.rvs	RO097.rvs.fastq.gz	62822	0	70-283	59	2.54847	191.887
	RO098.fwd	RO098.fwd.fastq.gz	63659	0	70-280	50	1.90547	242.579
	RO098.rvs	RO098.rvs.fastq.gz	63659	0	70-282	51	1.96673	209.257
	RO099.fwd	RO099.fwd.fastq.gz	67081	0	70-280	54	2.24952	240.592
	RO099.rvs	RO099.rvs.fastq.gz	67081	0	70-283	56	2.36282	192.401
	RO100.fwd	RO100.fwd.fastq.gz	71265	0	70-280	52	2.0515	233.238
	RO100.rvs	RO100.rvs.fastq.gz	71265	0	70-282	54	2.08237	195.321
	RO101.fwd	RO101.fwd.fastq.gz	57712	0	70-280	52	2.81397	233.466
	RO101.rvs	RO101.rvs.fastq.gz	57712	0	70-280	54	2.80011	195.615
	RO102.fwd	RO102.fwd.fastq.gz	54834	0	70-278	52	2.65164	211.835
	RO102.rvs	RO102.rvs.fastq.gz	54834	0	70-280	54	2.39815	194.958
	RO103.fwd	RO103.fwd.fastq.gz	64644	0	70-278	52	2.14714	236.711
	RO103.rvs	RO103.rvs.fastq.gz	64644	0	70-282	53	2.13786	200.187
	RO104.fwd	RO104.fwd.fastq.gz	61045	0	70-278	53	2.34909	238.747
	RO104.rvs	RO104.rvs.fastq.gz	61045	0	70-280	56	2.4441	194.664
	RO105.fwd	RO105.fwd.fastq.gz	59567	0	70-278	52	2.43255	243.445
	RO105.rvs	RO105.rvs.fastq.gz	59567	0	70-279	53	2.69948	199.87
	RO106.fwd	RO106.fwd.fastq.gz	62893	0	70-279	53	2.23554	236.049
	RO106.rvs	RO106.rvs.fastq.gz	62893	0	70-280	55	2.42634	195.084
	RO107.fwd	RO107.fwd.fastq.gz	60414	0	70-281	52	1.99623	240.778
	RO107.rvs	RO107.rvs.fastq.gz	60414	0	70-280	53	2.03595	191.431
	RO108.fwd	RO108.fwd.fastq.gz	56443	0	70-277	51	2.09946	242.854
	RO108.rvs	RO108.rvs.fastq.gz	56443	0	70-280	53	2.38293	190.212
	RO109.fwd	RO109.fwd.fastq.gz	56280	0	70-278	52	1.99893	248.939
	RO109.rvs	RO109.rvs.fastq.gz	56280	0	70-280	54	2.19261	189.527
	RO110.fwd	RO110.fwd.fastq.gz	60078	0	70-278	57	2.01738	222.253
	RO110.rvs	RO110.rvs.fastq.gz	60078	0	70-280	60	2.08229	184.448
	RO111.fwd	RO111.fwd.fastq.gz	61310	0	70-278	53	1.72892	246.103
	RO111.rvs	RO111.rvs.fastq.gz	61310	0	70-280	55	1.92301	195.039
	RO112.fwd	RO112.fwd.fastq.gz	60548	0	70-278	52	2.11403	242.182
	RO112.rvs	RO112.rvs.fastq.gz	60548	0	70-280	53	2.46086	200.596
	RO113.fwd	RO113.fwd.fastq.gz	62522	0	70-281	51	2.13045	248.838
	RO113.rvs	RO113.rvs.fastq.gz	62522	0	70-282	52	2.18003	198.683
	RO114.fwd	RO114.fwd.fastq.gz	63160	0	70-279	50	2.424	247.348
	RO114.rvs	RO114.rvs.fastq.gz	63160	0	70-282	52	2.80874	194.46
	RO115.fwd	RO115.fwd.fastq.gz	61849	0	70-281	57	2.33634	239.133
	RO115.rvs	RO115.rvs.fastq.gz	61849	0	70-282	59	2.49802	183.956
	RO116.fwd	RO116.fwd.fastq.gz	62048	0	70-281	50	2.29016	249.01
	RO116.rvs	RO116.rvs.fastq.gz	62048	0	70-282	51	2.61088	194.622
	RO117.fwd	RO117.fwd.fastq.gz	62090	0	70-281	54	1.85537	244.029
	RO117.rvs	RO117.rvs.fastq.gz	62090	0	70-282	57	2.03253	184.282
	RO118.fwd	RO118.fwd.fastq.gz	68692	0	70-280	55	1.95219	233.875
	RO118.rvs	RO118.rvs.fastq.gz	68692	0	70-282	56	2.20259	184.556
	RO119.fwd	RO119.fwd.fastq.gz	65226	0	70-280	58	2.0268	238.021
	RO119.rvs	RO119.rvs.fastq.gz	65226	0	70-279	61	2.12952	185.631
	RO120.fwd	RO120.fwd.fastq.gz	63510	0	70-281	59	1.61077	236.931
	RO120.rvs	RO120.rvs.fastq.gz	63510	0	70-282	62	1.65958	183.87
	RO121.fwd	RO121.fwd.fastq.gz	55695	0	70-281	53	2.51728	241.666
	RO121.rvs	RO121.rvs.fastq.gz	55695	0	70-282	54	2.7076	198.242
	RO122.fwd	RO122.fwd.fastq.gz	60146	0	70-281	49	1.59113	238.051
	RO122.rvs	RO122.rvs.fastq.gz	60146	0	70-282	50	1.63934	212.901
	RO123.fwd	RO123.fwd.fastq.gz	56239	0	70-281	53	2.37558	233.577
	RO123.rvs	RO123.rvs.fastq.gz	56239	0	70-283	54	2.68675	179.452
	RO124.fwd	RO124.fwd.fastq.gz	58846	0	70-281	50	1.76053	252.847
	RO124.rvs	RO124.rvs.fastq.gz	58846	0	70-283	51	1.79112	209.125
	RO125.fwd	RO125.fwd.fastq.gz	52168	0	70-281	51	1.82296	246.61
	RO125.rvs	RO125.rvs.fastq.gz	52168	0	70-282	53	2.02806	181.016
	RO126.fwd	RO126.fwd.fastq.gz	58048	0	70-281	51	2.11032	241.438
	RO126.rvs	RO126.rvs.fastq.gz	58048	0	70-282	53	2.1465	205.5
	RO127.fwd	RO127.fwd.fastq.gz	46809	0	70-281	51	2.5102	220.367
	RO127.rvs	RO127.rvs.fastq.gz	46809	0	70-283	53	2.27948	191.421
	RO128.fwd	RO128.fwd.fastq.gz	52282	0	70-282	49	2.26847	239.44
	RO128.rvs	RO128.rvs.fastq.gz	52282	0	70-282	50	2.54198	191.47
	RO129.fwd	RO129.fwd.fastq.gz	64479	0	70-280	52	2.16194	229.327
	RO129.rvs	RO129.rvs.fastq.gz	64479	0	70-282	53	2.14488	199.241
	RO130.fwd	RO130.fwd.fastq.gz	60632	0	70-281	49	2.28262	240.593
	RO130.rvs	RO130.rvs.fastq.gz	60632	0	70-282	50	2.27438	206.221
	RO131.fwd	RO131.fwd.fastq.gz	29147	0	70-281	53	1.88012	246.036
	RO131.rvs	RO131.rvs.fastq.gz	29147	0	70-282	55	2.16832	195.787
	RO132.fwd	RO132.fwd.fastq.gz	61854	0	70-281	53	2.3701	236.627
	RO132.rvs	RO132.rvs.fastq.gz	61854	0	70-282	55	2.40728	190.358
	RO133.fwd	RO133.fwd.fastq.gz	57410	0	70-281	54	1.97352	235.071
	RO133.rvs	RO133.rvs.fastq.gz	57410	0	70-282	55	1.88991	189.7
	RO134.fwd	RO134.fwd.fastq.gz	51447	0	70-281	50	2.63572	216.179
	RO134.rvs	RO134.rvs.fastq.gz	51447	0	70-282	52	2.27224	196.747
	RO135.fwd	RO135.fwd.fastq.gz	60076	0	70-280	49	1.91424	240.949
	RO135.rvs	RO135.rvs.fastq.gz	60076	0	70-283	50	2.06738	208.664
	RO136.fwd	RO136.fwd.fastq.gz	58934	0	70-280	53	2.16683	239.8
	RO136.rvs	RO136.rvs.fastq.gz	58934	0	70-282	54	2.38572	192.964
	RO137.fwd	RO137.fwd.fastq.gz	59582	0	70-281	52	2.59978	240.169
	RO137.rvs	RO137.rvs.fastq.gz	59582	0	70-282	54	2.8079	199.668
	RO138.fwd	RO138.fwd.fastq.gz	62436	0	70-281	50	2.35761	238.951
	RO138.rvs	RO138.rvs.fastq.gz	62436	0	70-282	51	2.35601	204.473
	RO139.fwd	RO139.fwd.fastq.gz	62921	0	70-281	51	1.94371	236.891
	RO139.rvs	RO139.rvs.fastq.gz	62921	0	70-283	51	1.99456	205.723
	RO140.fwd	RO140.fwd.fastq.gz	58155	0	70-281	52	2.45035	238.618
	RO140.rvs	RO140.rvs.fastq.gz	58155	0	70-282	54	2.56556	196.581
	RO141.fwd	RO141.fwd.fastq.gz	56019	0	70-281	53	2.59198	228.136
	RO141.rvs	RO141.rvs.fastq.gz	56019	0	70-282	55	2.59198	194.764
	RO142.fwd	RO142.fwd.fastq.gz	56947	0	70-281	54	2.64632	220.395
	RO142.rvs	RO142.rvs.fastq.gz	56947	0	70-284	55	2.54623	202.166
	RO143.fwd	RO143.fwd.fastq.gz	59163	0	70-281	49	2.35113	240.117
	RO143.rvs	RO143.rvs.fastq.gz	59163	0	70-283	51	2.36634	205.368
	RO144.fwd	RO144.fwd.fastq.gz	66069	0	70-280	52	1.28351	231.251
	RO144.rvs	RO144.rvs.fastq.gz	66069	0	70-283	53	1.32135	205.382
	RO145.fwd	RO145.fwd.fastq.gz	55765	0	70-278	53	2.30611	230.42
	RO145.rvs	RO145.rvs.fastq.gz	55765	0	70-281	54	2.43163	200.223
	RO146.fwd	RO146.fwd.fastq.gz	54323	0	70-278	52	2.80176	237.613
	RO146.rvs	RO146.rvs.fastq.gz	54323	0	70-280	53	2.81649	198.044
	RO147.fwd	RO147.fwd.fastq.gz	57196	0	70-279	49	2.05958	247.921
	RO147.rvs	RO147.rvs.fastq.gz	57196	0	70-282	49	2.08756	207.664
	RO148.fwd	RO148.fwd.fastq.gz	56531	0	70-280	48	2.14573	244.988
	RO148.rvs	RO148.rvs.fastq.gz	56531	0	70-283	49	2.37038	204.908
	RO149.fwd	RO149.fwd.fastq.gz	53499	0	70-279	50	2.1664	241.49
	RO149.rvs	RO149.rvs.fastq.gz	53499	0	70-282	51	2.13836	199.151
	RO150.fwd	RO150.fwd.fastq.gz	48025	0	70-278	51	2.42166	227.785
	RO150.rvs	RO150.rvs.fastq.gz	48025	0	70-282	53	2.26132	192.797
	RO151.fwd	RO151.fwd.fastq.gz	58182	0	70-280	52	2.23952	239.467
	RO151.rvs	RO151.rvs.fastq.gz	58182	0	70-280	53	2.43202	197.169
	RO152.fwd	RO152.fwd.fastq.gz	52432	0	70-278	51	2.04265	239.542
	RO152.rvs	RO152.rvs.fastq.gz	52432	0	70-282	52	2.31919	201.071
	RO153.fwd	RO153.fwd.fastq.gz	57842	0	70-280	51	2.51202	225.214
	RO153.rvs	RO153.rvs.fastq.gz	57842	0	70-282	53	2.40483	203.099
	RO154.fwd	RO154.fwd.fastq.gz	60865	0	70-280	51	2.08987	239.368
	RO154.rvs	RO154.rvs.fastq.gz	60865	0	70-282	53	2.12109	190.168
	RO155.fwd	RO155.fwd.fastq.gz	60926	0	70-280	48	2.29459	241.478
	RO155.rvs	RO155.rvs.fastq.gz	60926	0	70-283	49	2.60152	196.754
	RO156.fwd	RO156.fwd.fastq.gz	62341	0	70-281	51	2.10295	240.326
	RO156.rvs	RO156.rvs.fastq.gz	62341	0	70-283	54	2.17674	189.38
	RO157.fwd	RO157.fwd.fastq.gz	55667	0	70-281	53	2.32633	239.201
	RO157.rvs	RO157.rvs.fastq.gz	55667	0	70-282	55	2.36406	192.947
	RO158.fwd	RO158.fwd.fastq.gz	61988	0	70-281	55	2.29238	223.619
	RO158.rvs	RO158.rvs.fastq.gz	61988	0	70-282	57	2.11654	193.737
	RO159.fwd	RO159.fwd.fastq.gz	62088	0	70-282	53	2.20493	237.611
	RO159.rvs	RO159.rvs.fastq.gz	62088	0	70-282	54	2.26292	198.948
	RO160.fwd	RO160.fwd.fastq.gz	61742	0	70-280	56	2.05209	235.977
	RO160.rvs	RO160.rvs.fastq.gz	61742	0	70-282	59	2.13955	189.118
	RO161.fwd	RO161.fwd.fastq.gz	64972	0	70-280	49	2.37795	238.117
	RO161.rvs	RO161.rvs.fastq.gz	64972	0	70-280	50	2.36256	200.017
	RO162.fwd	RO162.fwd.fastq.gz	60213	0	70-278	52	2.17229	215.478
	RO162.rvs	RO162.rvs.fastq.gz	60213	0	70-279	53	2.17395	177.845
	RO163.fwd	RO163.fwd.fastq.gz	64885	0	70-281	53	1.77237	241.512
	RO163.rvs	RO163.rvs.fastq.gz	64885	0	70-282	54	1.96193	194.241
	RO164.fwd	RO164.fwd.fastq.gz	65984	0	70-279	52	1.89591	244.879
	RO164.rvs	RO164.rvs.fastq.gz	65984	0	70-282	54	1.93532	194.237
	RO165.fwd	RO165.fwd.fastq.gz	64494	0	70-280	49	2.12423	242.798
	RO165.rvs	RO165.rvs.fastq.gz	64494	0	70-284	50	2.19245	202.796
	RO166.fwd	RO166.fwd.fastq.gz	69301	0	70-278	58	1.74745	220.227
	RO166.rvs	RO166.rvs.fastq.gz	69301	0	70-280	61	1.79218	190.907
	RO167.fwd	RO167.fwd.fastq.gz	60976	0	70-281	55	2.20087	224.383
	RO167.rvs	RO167.rvs.fastq.gz	60976	0	70-280	57	2.15495	189.699
	RO168.fwd	RO168.fwd.fastq.gz	59777	0	70-277	54	2.93424	196.713
	RO168.rvs	RO168.rvs.fastq.gz	59777	0	70-280	56	2.56453	177.646
	RO169.fwd	RO169.fwd.fastq.gz	62063	0	70-281	52	2.32183	242.023
	RO169.rvs	RO169.rvs.fastq.gz	62063	0	70-282	54	2.49424	199.004
	RO170.fwd	RO170.fwd.fastq.gz	63441	0	70-281	51	1.73232	239.838
	RO170.rvs	RO170.rvs.fastq.gz	63441	0	70-282	53	1.82847	205.936
	RO171.fwd	RO171.fwd.fastq.gz	64571	0	70-281	51	2.16661	240.821
	RO171.rvs	RO171.rvs.fastq.gz	64571	0	70-282	52	2.4051	198.868
	RO172.fwd	RO172.fwd.fastq.gz	61193	0	70-281	51	2.24535	238.151
	RO172.rvs	RO172.rvs.fastq.gz	61193	0	70-282	53	2.11626	195.919
	RO173.fwd	RO173.fwd.fastq.gz	61444	0	70-282	54	2.37777	237.528
	RO173.rvs	RO173.rvs.fastq.gz	61444	0	70-282	55	2.64468	187.389
	RO174.fwd	RO174.fwd.fastq.gz	62113	0	70-281	56	2.27972	220.434
	RO174.rvs	RO174.rvs.fastq.gz	62113	0	70-283	59	2.11067	189.829
	RO175.fwd	RO175.fwd.fastq.gz	59576	0	70-281	52	2.44394	227.052
	RO175.rvs	RO175.rvs.fastq.gz	59576	0	70-282	54	2.02934	201.138
	RO176.fwd	RO176.fwd.fastq.gz	62183	0	70-281	53	1.8928	238.86
	RO176.rvs	RO176.rvs.fastq.gz	62183	0	70-282	55	1.98929	190.931
	RO177.fwd	RO177.fwd.fastq.gz	62019	0	70-281	52	2.51052	239.562
	RO177.rvs	RO177.rvs.fastq.gz	62019	0	70-282	54	2.625	198.245
	RO178.fwd	RO178.fwd.fastq.gz	64965	0	70-280	56	1.88563	235.05
	RO178.rvs	RO178.rvs.fastq.gz	64965	0	70-283	58	2.05033	196.293
	RO179.fwd	RO179.fwd.fastq.gz	62693	0	70-280	53	2.31924	236.936
	RO179.rvs	RO179.rvs.fastq.gz	62693	0	70-282	54	2.41973	192.125
	RO180.fwd	RO180.fwd.fastq.gz	64965	0	70-278	60	1.78558	228.855
	RO180.rvs	RO180.rvs.fastq.gz	64965	0	70-282	63	1.93489	179.86
	RO181.fwd	RO181.fwd.fastq.gz	58464	0	70-281	52	2.07649	235.304
	RO181.rvs	RO181.rvs.fastq.gz	58464	0	70-282	54	2.23043	194.523
	RO182.fwd	RO182.fwd.fastq.gz	58010	0	70-279	52	1.61524	238.128
	RO182.rvs	RO182.rvs.fastq.gz	58010	0	70-282	54	1.62558	201.668
	RO183.fwd	RO183.fwd.fastq.gz	64859	0	70-281	55	1.93034	233.769
	RO183.rvs	RO183.rvs.fastq.gz	64859	0	70-282	57	2.19553	194.105
	RO184.fwd	RO184.fwd.fastq.gz	60571	0	70-281	55	2.14624	235.367
	RO184.rvs	RO184.rvs.fastq.gz	60571	0	70-282	57	2.39554	191.146
	RO185.fwd	RO185.fwd.fastq.gz	52476	0	70-278	55	2.31153	237.415
	RO185.rvs	RO185.rvs.fastq.gz	52476	0	70-279	57	2.44874	192.814
	RO186.fwd	RO186.fwd.fastq.gz	52538	0	70-280	53	2.364	234.699
	RO186.rvs	RO186.rvs.fastq.gz	52538	0	70-280	55	2.16034	200.919
	RO187.fwd	RO187.fwd.fastq.gz	34019	0	70-278	52	2.7955	218.959
	RO187.rvs	RO187.rvs.fastq.gz	34019	0	70-279	57	2.88074	152.937
	RO188.fwd	RO188.fwd.fastq.gz	53353	0	70-278	49	2.11609	238.62
	RO188.rvs	RO188.rvs.fastq.gz	53353	0	70-280	50	2.29415	204.442

## Sheet: Dataset S3
Dataset S3: Fungal groups (Phylum/class/order/family/genus) identified in the present study
Phylum	Class	Order	Family	Genus	Functional classification (if Pathogen/AMF)
Ascomycota
	Arthoniomycetes	Arthoniales
	Dothideomycetes	Venturiales	Sympoventuriaceae	Ochroconis
				Scolecobasidium
		Pleosporales	Pleosporaceae	Curvularia	Pathogen
				Bipolaris	Pathogen
	Eurotiomycetes	Chaetothyriales	Chaetothyriales_fam_Incertae_sedis	Neophaeococcomyces
			Cyphellophoraceae	Cyphellophora
			Herpotrichiellaceae	Exophiala
				Minimelanolocus
		Eurotiales	Trichocomaceae	Thermomyces
		Onygenales	Onygenales_fam_Incertae_sedis	Chrysosporium
	Laboulbeniomycetes	Pyxidiophorales	Pyxidiophoraceae	Pyxidiophora
	Leotiomycetes
	Orbiliomycetes	Orbiliales	Orbiliaceae	Hyalorbilia
			Orbiliales_fam_Incertae_sedis	Microdochiella
				Vermispora
	Pezizomycetes	Pezizales	Helvellaceae	Helvella
			Pezizaceae
			Pyronemataceae	Diehliomyces
				Lamprospora
			Tuberaceae
	Saccharomycetes	Saccharomycetales	Debaryomycetaceae	Debaryomyces
	Sordariomycetes			Schwanniomyces
			Lipomycetaceae	Lipomyces
			Phaffomycetaceae	Barnettozyma
			Pichiaceae	Ogataea
			Saccharomycetaceae	Kazachstania
				Lachancea
				Saccharomyces
			Saccharomycetales_fam_Incertae_sedis	Candida
		Branch06
		Hypocreales	Clavicipitaceae	Metacordyceps
				Metapochonia
			Hypocreaceae	Monocillium
			Nectriaceae	Thelonectria
			Ophiocordycipitaceae	Hirsutella
		Magnaporthales	Magnaporthaceae	Gaeumannomyces	Pathogen
				Magnaporthiopsis	Pathogen
		Microascales	Halosphaeriaceae	Remispora	Pathogen
			Microascaceae	Cephalotrichum
				Gamsia
				Scedosporium
				Scopulariopsis
		Ophiostomatales	Ophiostomataceae	Pesotum
				Sporothrix
		Xylariales	Sporocadaceae	Pestalotiopsis	Pathogen
	Taphrinomycetes	Taphrinales	Taphrinaceae	Taphrina
Basidiobolomycota	Basidiobolomycetes	Basidiobolales	Basidiobolaceae	Basidiobolus
Basidiomycota	Agaricomycetes	Agaricales	Agaricaceae	Agaricus
				Chlorophyllum
				Coprinus
				Echinoderma
				Leucoagaricus
				Melanophyllum
				Tulostoma
			Bolbitiaceae	Agrocybe
				Conocybe
				Pholiotina
			Clavariaceae	Clavaria
				Clavulinopsis
				Hodophilus
				Ramariopsis
			Cortinariaceae	Cortinarius
				Gymnopilus
			Entolomataceae	Claudopus
				Clitopilus
				Pouzarella
				Rhodocybe
			Entolomataceae
			Fistulinaceae	Fistulina
			Hydnangiaceae	Laccaria
			Hygrophoraceae	Hygrocybe
				Hygrophorus
			Hymenogastraceae	Hebeloma
				Hymenogaster
				Naucoria
			Inocybaceae	Inocybe
				Mallocybe
			Lycoperdaceae	Bovista
				Calvatia
				Lycoperdon
			Lyophyllaceae	Fibulochlamys
				Lyophyllum
			Omphalotaceae	Rhodocollybia
			Physalacriaceae	Strobilurus
			Pleurotaceae	Hohenbuehelia
				Pleurotus
				Pluteus
				Volvariella
			Psathyrellaceae	Coprinellus
				Coprinopsis
				Homophron
				Lacrymaria
				Parasola
				Psathyrella
			Stephanosporaceae	Cristinia
				Lindtneria
				Stephanospora
			Strophariaceae	Galerina
				Hypholoma
				Pholiota
				Stropharia
				Tubaria
				Ampulloclitocybe
				Calyptella
				Dermoloma
				Floccularia
				Hemimycena
				Lepista
				Melanoleuca
				Mycena
				Paralepista
			Tricholomataceae	Tricholoma
			Typhulaceae	Typhula
		Agaricomycetes_ord_Incertae_sedis		Akenomyces
		Atheliales	Atheliaceae	Piloderma
		Auriculariales
		Boletales	Astraeaceae	Astraeus
			Boletaceae	Imleria
				Leccinum
				Xerocomellus
			Coniophoraceae	Coniophora
			Gomphidiaceae	Gomphidius
			Paxillaceae	Paxillus
			Rhizopogonaceae	Rhizopogon
			Sclerodermataceae	Scleroderma
				Scleroderma
			Suillaceae	Suillus
			Tapinellaceae	Tapinella
		Cantharellales	Cantharellales_fam_Incertae_sedis	Minimedusa
				Sistotrema
			Ceratobasidiaceae	Ceratobasidium
				Thanatephorus
				Waitea
			Clavulinaceae	Clavulina
			Hydnaceae	Hydnum
			Tulasnellaceae
		Corticiales	Corticiaceae	Corticium
		Geastrales	Geastraceae	Geastrum
		Gomphales	Gomphaceae	Phaeoclavulina
				Ramaria
		Hymenochaetales	Hymenochaetaceae	Inonotus
				Phylloporia
			Hymenochaetales_fam_Incertae_sedis	Peniophorella
			Schizoporaceae	Hyphodontia
				Lyomyces
				Xylodon
		Hysterangiales	Hysterangiaceae	Hysterangium
		Phallales	Gastrosporiaceae	Gastrosporium
			Phallaceae	Mutinus
		Polyporales	Ganodermataceae	Ganoderma	Pathogen
			Fomitopsidaceae	Piptoporus
				Postia
			Meripilaceae	Phlebia
			Phanerochaetaceae	Phanerochaete
				Phlebiopsis
			Podoscyphaceae	Abortiporus
				Hypochnicium
			Polyporaceae
			Polyporales_fam_Incertae_sedis	Climacocystis
			Steccherinaceae	Junghuhnia
		Russulales	Lachnocladiaceae	Asterostroma
				Gloiothele
			Russulaceae	Lactarius
				Russula
			Stereaceae	Stereum
		Sebacinales	Sebacinaceae	Chaetospermum
				Efibulobasidium
				Sebacina
			Serendipitaceae	Serendipita
		Thelephorales	Bankeraceae	Hydnellum
			Thelephoraceae	Pseudotomentella
				Thelephora
				Tomentella
		Trechisporales	Hydnodontaceae	Brevicellicium
				Subulicystidium
				Trechispora
		Tremellodendropsidales
	Agaricostilbomycetes	Agaricostilbales	Agaricostilbaceae	Sterigmatomyces
			Chionosphaeraceae	Kurtzmanomyces
			Kondoaceae
	Atractiellomycetes	Atractiellales	Hoehnelomycetaceae	Atractiella
	Classiculomycetes	Classiculales	Classiculaceae
	Cystobasidiomycetes	Cystobasidiales	Cystobasidiaceae	Cystobasidium
				Occultifur
		Cystobasidiomycetes_ord_Incertae_sedis	Buckleyzymaceae	Buckleyzyma
			Symmetrosporaceae	Symmetrospora
	Exobasidiomycetes	Exobasidiales	Brachybasidiaceae	Meira
		Georgefischeriales	Tilletiariaceae	Tilletiaria
		Microstromatales	Microstromataceae	Microstroma
			Microstromatales_fam_Incertae_sedis	Pseudomicrostroma
		Tilletiales	Tilletiaceae	Tilletia
	Geminibasidiomycetes	Geminibasidiales	Geminibasidiaceae	Basidioascus
				Geminibasidium
	Malasseziomycetes	Malasseziales	Malasseziaceae	Malassezia
	Microbotryomycetes	Heterogastridiales	Heterogastridiaceae	Pycnopulvinus
		Kriegeriales	Camptobasidiaceae	Glaciozyma
			Kriegeriaceae	Phenoliferia
		Leucosporidiales	Leucosporidiaceae	Leucosporidium
				Mastigobasidium
		Microbotryales	Microbotryaceae	Microbotryum
			Ustilentylomataceae	Ustilentyloma
		Microbotryomycetes_ord_Incertae_sedis	Chrysozymaceae	Slooffia
				Udeniozyma
		Sporidiobolales	Sporidiobolaceae	Rhodotorula	Pathogen
				Sporobolomyces
	Pucciniomycetes	Helicobasidiales	Helicobasidiaceae
		Platygloeales	Platygloeaceae
		Pucciniales	Coleosporiaceae	Coleosporium
			Pucciniaceae	Puccinia
				Uromyces
	Tremellomycetes	Cystofilobasidiales	Cystofilobasidiaceae	Cystofilobasidium
				Cystofilobasidium
			Mrakiaceae	Itersonilia	Pathogen
				Tausonia
		Filobasidiales	Filobasidiaceae	Filobasidium
				Goffeauzyma
				Naganishia
			Piskurozymaceae	Solicoccozyma
		Holtermanniales	Holtermanniales_fam_Incertae_sedis	Holtermanniella
		Tremellales	Tremellaceae	Filobasidiella
				Tremella
	Ustilaginomycetes	Urocystidales	Glomosporiaceae	Thecaphora
		Ustilaginales	Ustilaginaceae	Moesziomyces	Pathogen
				Tranzscheliella
				Ustilago
	Wallemiomycetes	Wallemiales	Wallemiaceae	Wallemia
Blastocladiomycota	Basidiobolomycetes	Basidiobolus	Basidiobolaceae	Basidiobolus
Chytridiomycota	Chytridiomycetes	Chytridiales	Chytridiaceae	Phlyctochytrium
			Chytriomycetaceae
	Lobulomycetes	Lobulomycetales
	Rhizophlyctidomycetes	Rhizophlyctidales	Rhizophlyctidaceae	Rhizophlyctis
		Rhizophydiales	Alphamycetaceae	Betamyces
			Rhizophydiaceae	Rhizophydium	Pathogen
			Rhizophydiales_fam_Incertae_sedis	Coralloidiomyces
				Operculomyces
	Spizellomycetes	Spizellomycetales	Powellomycetaceae	Powellomyces
			Spizellomycetaceae	Spizellomyces
				Triparticalcar
Entorrhizomycota	Entorrhizomycetes	Entorrhizales	Entorrhizaceae	Entorrhiza	Pathogen
Entomophthoromycota	Entomophthoromycetes	Entomophthorales	Ancylistaceae	Conidiobolus
Glomeromycota	Archaeosporomycetes	Archaeosporales	Ambisporaceae	Ambispora
				Archaeospora
	Glomeromycetes	Diversisporales	Diversisporaceae	Diversispora
		Glomerales	Claroideoglomeraceae	Claroideoglomus	AMF
			Glomeraceae	Dominikia
				Funneliformis	AMF
				Glomus	AMF
				Rhizophagus	AMF
				Septoglomus
	Paraglomeromycetes	GS24
		Paraglomerales	Paraglomeraceae	Paraglomus	AMF
Kickxellomycota	Kickxellomycetes	Kickxellales	Kickxellaceae	Ramicandelaber
Mortierellomycota	Mortierellomycetes	Mortierellales	Mortierellaceae	Mortierella
Mucoromycota	Endogonomycetes	Endogonales
	Mucoromycetes	Mucorales	Cunninghamellaceae	Absidia
				Cunninghamella
			Mucoraceae	Actinomucor
				Mucor
			Rhizopodaceae	Rhizopus
	Mucoromycotina_cls_Incertae_sedis	Mucoromycotina_ord_Incertae_sedis	Mucoromycotina_fam_Incertae_sedis	Bifiguratus
	Umbelopsidomycetes	Umbelopsidales	Umbelopsidaceae	Umbelopsis
Olpidiomycota	GS17	GS17
	Olpidiomycetes	Olpidiales	Olpidiaceae	Olpidium
Rozellomycota	Rozellomycotina_cls_Incertae_sedis	GS04
		GS11
Zoopagomycota	Zoopagomycetes	Zoopagales	Piptocephalidaceae	Piptocephalis

## Sheet: Dataset S4
Dataset S4: Diversity, richness and Good's coverage of fungal communities in all the samples from bulk soil, rhizopshere and root endosphere
Compartments	SampleID	Observed	Chao1	ACE	Shannon	Simpson	Good's Coverage
Bulksoil	1_1_A_Bulk	966	1215.96	1223.81	4.76707	0.973861	0.989488
Rhizosphere	1_1_A_Rhizosphere	912	1147.6	1142.91	4.67795	0.973097	0.991133
Root	1_1_A_Roots	302	367.167	365.093	2.89926	0.85197	0.99781
Bulksoil	1_1_B_Bulk	928	1183.16	1191.6	4.68051	0.965442	0.986089
Rhizosphere	1_1_B_Rhizosphere	1024	1347.94	1335.74	4.89379	0.981814	0.988958
Root	1_1_B_Roots	359	436.027	420.731	3.07526	0.806606	0.998426
Bulksoil	1_1_C_Bulk	931	1190	1193.12	4.86298	0.98016	0.990449
Rhizosphere	1_1_C_Rhizosphere	659	883.628	911.861	4.054	0.946481	0.986437
Root	1_1_C_Roots	237	282.12	277.504	2.18304	0.629002	0.999182
Bulksoil	1_1_D_Bulk	935	1202.02	1206.41	4.81559	0.978688	0.990037
Rhizosphere	1_1_D_Rhizosphere	957	1224.15	1228.04	4.56315	0.959394	0.985908
Root	1_1_D_Roots	369	544.778	498.874	2.99397	0.794496	0.997837
Bulksoil	1_2_A_Bulk	971	1236.01	1234.89	5.06516	0.986289	0.985917
Rhizosphere	1_2_A_Rhizosphere	934	1117.56	1107.84	4.99078	0.983986	0.991463
Root	1_2_A_Roots	381	439.519	447.799	3.66221	0.944894	0.995112
Bulksoil	1_2_B_Bulk	796	1039.25	1039.43	4.62745	0.977082	0.987045
Rhizosphere	1_2_B_Rhizosphere	823	1052.71	1088.23	4.53908	0.972498	0.985037
Root	1_2_B_Roots	279	338.947	344.937	3.08136	0.910091	0.993797
Bulksoil	1_2_C_Bulk	771	971.172	1000.86	4.49657	0.960993	0.990165
Rhizosphere	1_2_C_Rhizosphere	803	1052.58	1063.4	4.64699	0.973942	0.987889
Root	1_2_C_Roots	280	325.724	321.387	3.08074	0.881533	0.99323
Bulksoil	1_2_D_Bulk	996	1314.94	1295.89	5.12529	0.987096	0.990041
Rhizosphere	1_2_D_Rhizosphere	940	1149.02	1173.03	4.77244	0.972907	0.989485
Root	1_2_D_Roots	362	444.269	455.911	3.33752	0.898811	0.990251
Bulksoil	1_3_A_Bulk	976	1138.07	1155.28	5.03096	0.985625	0.992003
Rhizosphere	1_3_A_Rhizosphere	1170	1170	1170	5.10814	0.985217	1
Root	1_3_A_Roots	498	498	498	3.67457	0.923307	1
Bulksoil	1_3_B_Bulk	987	1179.28	1196.94	4.86662	0.977966	0.988498
Rhizosphere	1_3_B_Rhizosphere	1127	1127	1127	5.0271	0.983536	1
Root	1_3_B_Roots	548	548	548	4.0189	0.946556	1
Bulksoil	1_3_C_Bulk	886	1094.85	1084.64	4.69025	0.971123	0.989163
Rhizosphere	1_3_C_Rhizosphere	1039	1039	1039	5.03463	0.983245	1
Root	1_3_C_Roots	410	410	410	3.88819	0.958266	1
Bulksoil	1_3_D_Bulk	820	1029.25	1026.86	4.74166	0.977359	0.991134
Rhizosphere	1_3_D_Rhizosphere	1017	1017	1017	4.97013	0.983243	1
Root	1_3_D_Roots	432	432	432	3.69679	0.938751	1
Bulksoil	1_4_A_Bulk	928	1195.12	1185.7	4.81204	0.980049	0.98969
Rhizosphere	1_4_A_Rhizosphere	1050	1050	1050	5.01886	0.984276	1
Root	1_4_A_Roots	490	490	490	3.08068	0.862903	1
Bulksoil	1_4_B_Bulk	785	978.946	992.578	4.70466	0.976776	0.98968
Rhizosphere	1_4_B_Rhizosphere	886	886	886	4.53433	0.964682	1
Root	1_4_B_Roots	343	343	343	3.32573	0.867985	1
Bulksoil	1_4_C_Bulk	953	1181.64	1197.09	4.98432	0.985091	0.989946
Rhizosphere	1_4_C_Rhizosphere	1099	1099	1099	5.20569	0.987874	1
Root	1_4_C_Roots	423	423	423	3.39146	0.905566	1
Bulksoil	1_4_D_Bulk	838	1063.45	1084.49	4.89257	0.984966	0.986219
Rhizosphere	1_4_D_Rhizosphere	968	968	968	5.04504	0.98457	1
Root	1_4_D_Roots	309	309	309	3.08419	0.870399	1
Bulksoil	2_5_A_Bulk	791	993.893	1018.81	4.59575	0.974793	0.991391
Rhizosphere	2_5_A_Rhizosphere	1007	1007	1007	5.02693	0.986141	1
Root	2_5_A_Roots	409	409	409	3.68289	0.944853	1
Bulksoil	2_5_B_Bulk	949	1161.82	1144.1	4.65059	0.959505	0.983512
Rhizosphere	2_5_B_Rhizosphere	1094	1094	1094	5.00518	0.98189	1
Root	2_5_B_Roots	507	507	507	3.74672	0.944166	1
Bulksoil	2_5_C_Bulk	888	1109.3	1088.33	4.84937	0.982427	0.992313
Rhizosphere	2_5_C_Rhizosphere	986	986	986	4.87617	0.980766	1
Root	2_5_C_Roots	439	439	439	3.44848	0.927627	1
Bulksoil	2_5_D_Bulk	863	1094.36	1094.47	4.523	0.96555	0.991169
Rhizosphere	2_5_D_Rhizosphere	1137	1137	1137	4.9506	0.978675	1
Root	2_5_D_Roots	581	581	581	3.93186	0.946854	1
Bulksoil	2_6_A_Bulk	709	913.207	904.92	4.62354	0.976843	0.989022
Rhizosphere	2_6_A_Rhizosphere	758	989.336	1020.7	4.55484	0.972628	0.991206
Root	2_6_A_Roots	455	509.091	518.714	3.87361	0.952916	0.996361
Bulksoil	2_6_B_Bulk	839	1188.79	1127.29	4.39465	0.95132	0.992347
Rhizosphere	2_6_B_Rhizosphere	893	1111.77	1126.78	4.58163	0.966828	0.993123
Root	2_6_B_Roots	397	481.058	472.933	3.34563	0.916666	0.998055
Bulksoil	2_6_C_Bulk	964	1217	1195.76	5.06308	0.986197	0.989359
Rhizosphere	2_6_C_Rhizosphere	996	1294.47	1261.62	4.99196	0.984712	0.989522
Root	2_6_C_Roots	265	360.758	347.973	2.36788	0.803335	0.998092
Bulksoil	2_6_D_Bulk	986	1241.01	1224.45	4.97844	0.980425	0.987977
Rhizosphere	2_6_D_Rhizosphere	830	1111.98	1078.13	4.65409	0.976954	0.988441
Root	2_6_D_Roots	380	447.683	432.79	3.71315	0.94649	0.997532
Bulksoil	2_7_A_Bulk	876	1119	1120.85	4.97316	0.985927	0.988478
Rhizosphere	2_7_A_Rhizosphere	966	966	966	4.9682	0.984735	1
Root	2_7_A_Roots	354	354	354	3.1501	0.879862	1
Bulksoil	2_7_B_Bulk	826	1033.06	1002.72	4.82378	0.981079	0.989462
Rhizosphere	2_7_B_Rhizosphere	987	987	987	5.0005	0.984218	1
Root	2_7_B_Roots	330	330	330	3.11182	0.871124	1
Bulksoil	2_7_C_Bulk	944	1152.77	1163.22	4.82654	0.97688	0.989904
Rhizosphere	2_7_C_Rhizosphere	981	981	981	4.56962	0.967266	1
Root	2_7_C_Roots	330	330	330	3.06061	0.873625	1
Bulksoil	2_7_D_Bulk	946	1133.69	1139.32	4.71929	0.977033	0.990086
Rhizosphere	2_7_D_Rhizosphere	957	957	957	4.49016	0.964482	1
Root	2_7_D_Roots	359	359	359	3.26916	0.903961	1
Bulksoil	2_8_A_Bulk	893	1087.72	1113.95	4.85898	0.98286	0.991812
Rhizosphere	2_8_A_Rhizosphere	1156	1156	1156	5.07902	0.984518	1
Root	2_8_A_Roots	503	503	503	3.92382	0.946428	1
Bulksoil	2_8_B_Bulk	771	996.198	989.696	4.07088	0.918372	0.987154
Rhizosphere	2_8_B_Rhizosphere	1045	1045	1045	4.91	0.982106	1
Root	2_8_B_Roots	455	455	455	3.53066	0.92512	1
Bulksoil	2_8_C_Bulk	975	1173.89	1185.47	4.92319	0.981318	0.992233
Rhizosphere	2_8_C_Rhizosphere	1205	1205	1205	5.11728	0.98472	1
Root	2_8_C_Roots	563	563	563	4.14657	0.964859	1
Bulksoil	2_8_D_Bulk	883	1097.37	1100.99	4.89494	0.983569	0.989772
Rhizosphere	2_8_D_Rhizosphere	1071	1071	1071	4.94059	0.982932	1
Root	2_8_D_Roots	475	475	475	3.81305	0.937268	1
Bulksoil	3_10_A_Bulk	865	1130.89	1131.35	4.69766	0.974114	0.98906
Rhizosphere	3_10_A_Rhizosphere	1071	1071	1071	4.92773	0.980901	1
Root	3_10_A_Roots	353	353	353	3.47983	0.915223	1
Bulksoil	3_10_B_Bulk	745	976.757	998.645	4.62646	0.978958	0.990817
Rhizosphere	3_10_B_Rhizosphere	983	983	983	4.73809	0.977203	1
Root	3_10_B_Roots	408	408	408	3.3766	0.889862	1
Bulksoil	3_10_C_Bulk	1044	1457.13	1396.46	4.90656	0.979443	0.985251
Rhizosphere	3_10_C_Rhizosphere	1116	1116	1116	5.00006	0.981755	1
Root	3_10_C_Roots	542	542	542	3.84939	0.939895	1
Bulksoil	3_10_D_Bulk	1023	1304.21	1260.59	4.9122	0.980757	0.98739
Rhizosphere	3_10_D_Rhizosphere	1126	1126	1126	5.02599	0.981805	1
Root	3_10_D_Roots	517	517	517	3.57481	0.907416	1
Bulksoil	3_11_A_Bulk	676	851.035	833.6	4.50464	0.974338	0.99067
Rhizosphere	3_11_A_Rhizosphere	882	882	882	4.62021	0.972219	1
Root	3_11_A_Roots	489	489	489	3.97852	0.945386	1
Bulksoil	3_11_B_Bulk	976	1285.76	1271.56	4.91199	0.980259	0.989516
Rhizosphere	3_11_B_Rhizosphere	1023	1023	1023	4.91636	0.980204	1
Root	3_11_B_Roots	469	469	469	3.5899	0.89601	1
Bulksoil	3_11_C_Bulk	970	1182.98	1240.81	4.97681	0.983689	0.988698
Rhizosphere	3_11_C_Rhizosphere	1025	1025	1025	5.0489	0.985493	1
Root	3_11_C_Roots	423	423	423	3.3591	0.897786	1
Bulksoil	3_11_D_Bulk	803	1064.06	1041.02	4.67129	0.973686	0.991415
Rhizosphere	3_11_D_Rhizosphere	1017	1017	1017	4.9439	0.982665	1
Root	3_11_D_Roots	352	352	352	3.52158	0.90163	1
Bulksoil	3_12_A_Bulk	894	1111.62	1121.8	4.84649	0.981914	0.989202
Rhizosphere	3_12_A_Rhizosphere	934	1184.08	1212.73	4.75014	0.9755	0.989018
Root	3_12_A_Roots	330	378.3	387.292	3.25531	0.897396	0.997751
Bulksoil	3_12_B_Bulk	828	1045.85	1060.16	4.65316	0.974786	0.988257
Rhizosphere	3_12_B_Rhizosphere	828	1003.01	1000.46	4.69557	0.978353	0.992129
Root	3_12_B_Roots	300	371	367.4	3.19734	0.87373	0.998393
Bulksoil	3_12_C_Bulk	883	1042.52	1048.93	4.91294	0.983747	0.991539
Rhizosphere	3_12_C_Rhizosphere	928	1140.82	1135.75	4.94047	0.982085	0.989914
Root	3_12_C_Roots	301	381.5	366.419	2.7933	0.782194	0.998812
Bulksoil	3_12_D_Bulk	851	1070.09	1074.27	4.92104	0.98514	0.986707
Rhizosphere	3_12_D_Rhizosphere	834	1013.64	1028.22	4.88942	0.984394	0.991803
Root	3_12_D_Roots	315	419.429	395.327	2.99808	0.860394	0.997567
Bulksoil	3_9_A_Bulk	951	1266	1218.72	4.4186	0.947767	0.987477
Rhizosphere	3_9_A_Rhizosphere	1075	1075	1075	4.95191	0.979967	1
Root	3_9_A_Roots	502	502	502	4.05773	0.95972	1
Bulksoil	3_9_B_Bulk	771	1022.58	1053	4.54675	0.973334	0.989827
Rhizosphere	3_9_B_Rhizosphere	882	882	882	4.68938	0.971876	1
Root	3_9_B_Roots	415	415	415	3.74732	0.941862	1
Bulksoil	3_9_C_Bulk	889	1202.96	1204.55	4.82366	0.981	0.988493
Rhizosphere	3_9_C_Rhizosphere	979	979	979	4.94227	0.982975	1
Root	3_9_C_Roots	482	482	482	4.18178	0.960802	1
Bulksoil	3_9_D_Bulk	909	1068.43	1101.29	4.95373	0.983723	0.99215
Rhizosphere	3_9_D_Rhizosphere	1070	1070	1070	4.94342	0.982439	1
Root	3_9_D_Roots	611	611	611	4.05724	0.949537	1
Bulksoil	4_13_A_Bulk	916	1227.76	1161.3	4.85955	0.98184	0.989326
Rhizosphere	4_13_A_Rhizosphere	1179	1179	1179	5.12188	0.9849	1
Root	4_13_A_Roots	428	428	428	3.62106	0.90582	1
Bulksoil	4_13_B_Bulk	875	1114	1103.81	4.86308	0.982434	0.988712
Rhizosphere	4_13_B_Rhizosphere	894	894	894	4.95023	0.984811	1
Root	4_13_B_Roots	381	381	381	3.37282	0.911767	1
Bulksoil	4_13_C_Bulk	909	1101.97	1089.44	4.97617	0.984842	0.992418
Rhizosphere	4_13_C_Rhizosphere	1005	1005	1005	4.89382	0.981542	1
Root	4_13_C_Roots	495	495	495	3.79335	0.918066	1
Bulksoil	4_13_D_Bulk	952	1098.26	1099.57	5.19234	0.986032	0.991822
Rhizosphere	4_13_D_Rhizosphere	1020	1020	1020	4.79733	0.975819	1
Root	4_13_D_Roots	421	421	421	3.2322	0.87846	1
Bulksoil	4_14_A_Bulk	820	990.339	1009.54	4.7362	0.978034	0.987823
Rhizosphere	4_14_A_Rhizosphere	839	1024.15	1072.13	4.73718	0.978268	0.986796
Root	4_14_A_Roots	317	422	441.408	3.21624	0.925397	0.995861
Bulksoil	4_14_B_Bulk	841	1008.5	1014.95	4.95244	0.985399	0.993391
Rhizosphere	4_14_B_Rhizosphere	906	1145.89	1164.65	4.82097	0.980014	0.99017
Root	4_14_B_Roots	331	408.609	426.623	3.66595	0.950692	0.996395
Bulksoil	4_14_C_Bulk	801	989.527	993.246	4.80948	0.983064	0.990776
Rhizosphere	4_14_C_Rhizosphere	864	1105.02	1120.43	4.94911	0.985756	0.990247
Root	4_14_C_Roots	348	405	413.118	3.45683	0.935463	0.998073
Bulksoil	4_14_D_Bulk	930	1191.39	1218.47	4.79299	0.980894	0.989833
Rhizosphere	4_14_D_Rhizosphere	1004	1295	1300.47	4.96322	0.984198	0.990704
Root	4_14_D_Roots	408	541.784	496.704	3.49263	0.938589	0.995688
Bulksoil	4_15_A_Bulk	908	1215.13	1194.87	4.45713	0.943999	0.987401
Rhizosphere	4_15_A_Rhizosphere	1154	1154	1154	5.03383	0.982337	1
Root	4_15_A_Roots	575	575	575	4.08714	0.96384	1
Bulksoil	4_15_B_Bulk	820	1033	1009.57	4.61162	0.971824	0.990232
Rhizosphere	4_15_B_Rhizosphere	904	904	904	4.8608	0.97865	1
Root	4_15_B_Roots	399	399	399	3.61301	0.945417	1
Bulksoil	4_15_C_Bulk	811	1044.52	1031.46	4.74073	0.979901	0.991678
Rhizosphere	4_15_C_Rhizosphere	1148	1148	1148	5.20496	0.987935	1
Root	4_15_C_Roots	426	426	426	3.71168	0.950284	1
Bulksoil	4_15_D_Bulk	919	1240.37	1197.73	4.86414	0.9828	0.990329
Rhizosphere	4_15_D_Rhizosphere	1148	1148	1148	5.09596	0.985321	1
Root	4_15_D_Roots	543	543	543	4.02123	0.963825	1
Bulksoil	4_16_A_Bulk	948	1146.26	1164.72	4.69181	0.974055	0.986901
Rhizosphere	4_16_A_Rhizosphere	1134	1134	1134	4.94527	0.979301	1
Root	4_16_A_Roots	490	490	490	4.0196	0.949131	1
Bulksoil	4_16_B_Bulk	1015	1300.94	1253.8	4.9908	0.982989	0.98632
Rhizosphere	4_16_B_Rhizosphere	1151	1151	1151	4.94641	0.981374	1
Root	4_16_B_Roots	547	547	547	3.94876	0.949534	1
Bulksoil	4_16_C_Bulk	846	1039.32	1041.75	4.84147	0.981971	0.992471
Rhizosphere	4_16_C_Rhizosphere	979	979	979	5.01012	0.984616	1
Root	4_16_C_Roots	516	516	516	3.91136	0.940428	1
Bulksoil	4_16_D_Bulk	783	950.804	951.95	4.8424	0.983445	0.991363
Rhizosphere	4_16_D_Rhizosphere	1034	1034	1034	5.12169	0.987226	1
Root	4_16_D_Roots	455	455	455	3.70193	0.923572	1
Bulksoil	5_17_A_Bulk	930	1154.01	1174.09	4.52523	0.96075	0.988413
Rhizosphere	5_17_A_Rhizosphere	911	1162.02	1152.24	4.49129	0.965432	0.98772
Root	5_17_A_Roots	333	386.625	412.287	2.96193	0.84958	0.997694
Bulksoil	5_17_B_Bulk	733	906.379	897.565	4.69282	0.979039	0.990561
Rhizosphere	5_17_B_Rhizosphere	866	1084.09	1112.71	4.89307	0.982874	0.990509
Root	5_17_B_Roots	263	352.444	337.576	2.55666	0.796216	0.998724
Bulksoil	5_17_C_Bulk	876	1125.21	1143.28	4.3119	0.951338	0.986412
Rhizosphere	5_17_C_Rhizosphere	899	1283.45	1215.73	4.45287	0.961137	0.984051
Root	5_17_C_Roots	311	402.286	380.828	3.01923	0.843113	0.999
Bulksoil	5_17_D_Bulk	825	1111.61	1089.4	4.78134	0.98136	0.990664
Rhizosphere	5_17_D_Rhizosphere	945	1158.5	1178.75	4.96041	0.98241	0.990536
Root	5_17_D_Roots	252	327.469	330.753	2.48555	0.790396	0.998602
Bulksoil	5_18_A_Bulk	878	1077.44	1071.86	4.8908	0.983651	0.989199
Rhizosphere	5_18_A_Rhizosphere	1021	1021	1021	5.0245	0.985012	1
Root	5_18_A_Roots	410	410	410	3.54844	0.930693	1
Bulksoil	5_18_B_Bulk	985	1265.11	1223.87	4.85609	0.979775	0.990026
Rhizosphere	5_18_B_Rhizosphere	1143	1143	1143	5.03698	0.984318	1
Root	5_18_B_Roots	512	512	512	4.12063	0.948516	1
Bulksoil	5_18_C_Bulk	873	1132.91	1110.05	4.82813	0.980555	0.985734
Rhizosphere	5_18_C_Rhizosphere	988	988	988	4.92026	0.983483	1
Root	5_18_C_Roots	447	447	447	3.61111	0.933373	1
Bulksoil	5_18_D_Bulk	999	1250.85	1249.16	5.05716	0.984571	0.989167
Rhizosphere	5_18_D_Rhizosphere	1117	1117	1117	5.05661	0.984156	1
Root	5_18_D_Roots	491	491	491	3.89411	0.942098	1
Bulksoil	5_19_A_Bulk	816	1087.73	1082.07	4.64611	0.977394	0.985238
Rhizosphere	5_19_A_Rhizosphere	857	857	857	4.60045	0.977627	1
Root	5_19_A_Roots	349	349	349	3.23216	0.865074	1
Bulksoil	5_19_B_Bulk	885	1038.85	1064.39	4.88414	0.981332	0.990221
Rhizosphere	5_19_B_Rhizosphere	958	958	958	5.02083	0.985617	1
Root	5_19_B_Roots	427	427	427	3.98872	0.96398	1
Bulksoil	5_19_C_Bulk	738	951.464	945.172	4.33247	0.961247	0.993249
Rhizosphere	5_19_C_Rhizosphere	935	935	935	4.55369	0.966271	1
Root	5_19_C_Roots	427	427	427	3.43387	0.934509	1
Bulksoil	5_19_D_Bulk	1007	1216.34	1204.01	5.09647	0.984874	0.990653
Rhizosphere	5_19_D_Rhizosphere	1059	1059	1059	5.09661	0.985341	1
Root	5_19_D_Roots	560	560	560	4.13151	0.962157	1
Bulksoil	5_20_A_Bulk	829	998.214	1019.44	4.76468	0.973841	0.99259
Rhizosphere	5_20_A_Rhizosphere	953	953	953	4.86291	0.979401	1
Root	5_20_A_Roots	433	433	433	3.84614	0.956859	1
Bulksoil	5_20_B_Bulk	954	1177.39	1178.77	4.95984	0.984942	0.990147
Rhizosphere	5_20_B_Rhizosphere	1136	1136	1136	5.03562	0.984138	1
Root	5_20_B_Roots	476	476	476	3.49627	0.912822	1
Bulksoil	5_20_C_Bulk	949	1189.64	1187.43	4.78183	0.979577	0.990428
Rhizosphere	5_20_C_Rhizosphere	1013	1013	1013	4.87801	0.982993	1
Root	5_20_C_Roots	490	490	490	3.49297	0.914603	1
Bulksoil	5_20_D_Bulk	848	1055.02	1066.39	4.89243	0.981175	0.990999
Rhizosphere	5_20_D_Rhizosphere	940	940	940	4.93232	0.98249	1
Root	5_20_D_Roots	520	520	520	4.21852	0.968537	1
Bulksoil	6_21_A_Bulk	998	1258.16	1255.74	4.94413	0.983189	0.988313
Rhizosphere	6_21_A_Rhizosphere	1332	1332	1332	5.17964	0.985224	1
Root	6_21_A_Roots	477	622.714	624.418	3.42178	0.889615	0.995567
Bulksoil	6_21_B_Bulk	1027	1265.52	1253.19	5.02401	0.984728	0.990591
Rhizosphere	6_21_B_Rhizosphere	1173	1173	1173	4.96506	0.980166	1
Root	6_21_B_Roots	358	437.333	435.585	3.22529	0.877114	0.998107
Bulksoil	6_21_C_Bulk	921	1136.82	1152.23	5.02849	0.98466	0.989985
Rhizosphere	6_21_C_Rhizosphere	1162	1162	1162	5.18847	0.987773	1
Root	6_21_C_Roots	245	326.889	315.804	2.91119	0.856069	0.99862
Bulksoil	6_21_D_Bulk	799	1052.57	1063.01	4.24347	0.94472	0.983371
Rhizosphere	6_21_D_Rhizosphere	1085	1085	1085	5.0817	0.986401	1
Root	6_21_D_Roots	303	389.719	374.681	3.14852	0.875042	0.998205
Bulksoil	6_22_A_Bulk	847	1056.01	1066.76	4.82119	0.982058	0.98594
Rhizosphere	6_22_A_Rhizosphere	1000	1000	1000	5.02456	0.984415	1
Root	6_22_A_Roots	417	417	417	3.66636	0.942584	1
Bulksoil	6_22_B_Bulk	822	1057.51	1047.72	4.79601	0.980979	0.987121
Rhizosphere	6_22_B_Rhizosphere	1035	1035	1035	5.00963	0.983117	1
Root	6_22_B_Roots	526	526	526	3.70397	0.928389	1
Bulksoil	6_22_C_Bulk	908	1105.64	1114.31	4.96971	0.981816	0.991291
Rhizosphere	6_22_C_Rhizosphere	1113	1113	1113	5.09032	0.985116	1
Root	6_22_C_Roots	579	579	579	3.85375	0.939758	1
Bulksoil	6_22_D_Bulk	947	1149.41	1148.52	4.98874	0.985375	0.991626
Rhizosphere	6_22_D_Rhizosphere	1128	1128	1128	5.03033	0.985058	1
Root	6_22_D_Roots	479	479	479	3.74864	0.93144	1
Bulksoil	6_23_A_Bulk	829	1006.37	980.271	4.97188	0.984811	0.993338
Rhizosphere	6_23_A_Rhizosphere	912	1190.26	1156.24	4.74464	0.977473	0.989286
Root	6_23_A_Roots	329	420.973	429.484	3.05957	0.821985	0.998252
Bulksoil	6_23_B_Bulk	1008	1233.45	1195.21	5.13353	0.987583	0.992245
Rhizosphere	6_23_B_Rhizosphere	925	1182.02	1181.62	4.94068	0.984223	0.99172
Root	6_23_B_Roots	420	547.553	538.167	3.32631	0.834808	0.997739
Bulksoil	6_23_C_Bulk	811	1017.38	977.366	4.87265	0.982715	0.993008
Rhizosphere	6_23_C_Rhizosphere	820	982.105	956.914	4.91066	0.982803	0.991056
Root	6_23_C_Roots	249	306	312.989	2.77833	0.828978	0.998665
Bulksoil	6_23_D_Bulk	713	895.382	849.304	4.53281	0.965381	0.992837
Rhizosphere	6_23_D_Rhizosphere	872	1091.85	1089.47	4.5541	0.964045	0.989766
Root	6_23_D_Roots	297	360.171	363.034	3.0467	0.820649	0.998793
Bulksoil	6_24_A_Bulk	892	1093.93	1109.39	4.69504	0.975199	0.988912
Rhizosphere	6_24_A_Rhizosphere	1064	1064	1064	5.01827	0.982853	1
Root	6_24_A_Roots	418	418	418	3.81761	0.94528	1
Bulksoil	6_24_B_Bulk	826	1018.35	1021.93	4.84159	0.980972	0.990748
Rhizosphere	6_24_B_Rhizosphere	919	919	919	4.82747	0.978335	1
Root	6_24_B_Roots	386	386	386	3.20754	0.869653	1
Bulksoil	6_24_C_Bulk	790	993	987.964	4.64908	0.975516	0.992691
Rhizosphere	6_24_C_Rhizosphere	815	815	815	4.6212	0.971056	1
Root	6_24_C_Roots	447	447	447	3.85598	0.943013	1
Bulksoil	6_24_D_Bulk	991	1165.5	1183.14	5.06998	0.98429	0.992266
Rhizosphere	6_24_D_Rhizosphere	1071	1071	1071	4.92352	0.979432	1
Root	6_24_D_Roots	478	478	478	3.88987	0.950529	1

## Sheet: Dataset S5
Dataset S5: Model performance neutral community model (NCM). Adjusted R² (%) and Akaike Information Criteria (AIC) values of fungal communities in bulk soil (BS), rhizosphere (RS) and root (RO). Lower AIC values suggest a more parsimonious model.
Compartment	Adjusted R²	AIC
BS	101.6	-4011.72
RS	106	-5073.96
RO	61.68	-3691.6

## Sheet: Dataset S6
Dataset S6: Pairwise comparisons of alpha diversities between compartments. Hypothesis testing was carried out using Kruskal-Wallis Rank Sum
Comparison	Measure	Method	Group	P.unadj	P.adj	Significance
BS - RS	Observed	Wilcoxon Rank Sum Test	RS	1.40679e-12	1.99913e-12	ns
BS - RO	Observed	Wilcoxon Rank Sum Test	BS	5.6635e-33	1.69905e-32	***
RS - RO	Observed	Wilcoxon Rank Sum Test	RS	5.40813e-33	1.69905e-32	***
BS - RS	Chao1	Wilcoxon Rank Sum Test	BS	0.00880586	0.0108072	*
BS - RO	Chao1	Wilcoxon Rank Sum Test	BS	5.24727e-33	1.69905e-32	***
RS - RO	Chao1	Wilcoxon Rank Sum Test	RS	5.24406e-33	1.69905e-32	***
BS - RS	Shannon	Wilcoxon Rank Sum Test	RS	0.00636075	0.00817811	ns
BS - RO	Shannon	Wilcoxon Rank Sum Test	BS	1.5649e-32	3.84112e-32	***
RS - RO	Shannon	Wilcoxon Rank Sum Test	RS	9.8128e-33	2.64946e-32	***
BS - RS	Simpson	Wilcoxon Rank Sum Test	RS	0.264599	0.297673	ns
BS - RO	Simpson	Wilcoxon Rank Sum Test	BS	2.27612e-31	4.09702e-31	***
RS - RO	Simpson	Wilcoxon Rank Sum Test	RS	6.09924e-32	1.26676e-31	***

## Sheet: Dataset S7
Dataset S7: Permutational MANOVA results using aitchison distance metric for bulk soil, rhizopshere and root compartments
PERMANOVA
Group	F	R2	p.value	p.adjusted	Significance
BS vs RS	17.63	0.08	0.001	0.001	***
BS vs RO	72.49	0.28	0.001	0.001	***
RS vs RO	66.02	0.26	0.001	0.001	***
BS = bulk soil; RS = rhizosphere and RO = Root

## Sheet: Dataset S8
Dataset S8: Taxonomic abundance changes of fungal communities along the bulk soil, rhizopshere and root compartments
Taxa	Direction	Change	BS -> | Significance	RS -> RO | Significance
k__Fungi|p__Aphelidiomycota	BS -> RS -> RO	+|-	ns	***	***
k__Fungi|p__Ascomycota	BS -> RS -> RO	Decrease	**	***	***
k__Fungi|p__Basidiobolomycota	BS -> RS -> RO	+|-	ns	*	*
k__Fungi|p__Basidiomycota	BS -> RS -> RO	Increase	ns	*	*
k__Fungi|p__Blastocladiomycota	BS -> RS -> RO	Decrease	ns	ns	ns
k__Fungi|p__Calcarisporiellomycota	BS -> RS -> RO	+|-	ns	ns	ns
k__Fungi|p__Chytridiomycota	BS -> RS -> RO	Decrease	ns	***	***
k__Fungi|p__Entomophthoromycota	BS -> RS -> RO	Decrease	ns	**	**
k__Fungi|p__Glomeromycota	BS -> RS -> RO	Increase	ns	***	***
k__Fungi|p__Kickxellomycota	BS -> RS -> RO	+|-	ns	***	***
k__Fungi|p__Mortierellomycota	BS -> RS -> RO	+|-	*	***	***
k__Fungi|p__Mucoromycota	BS -> RS -> RO	+|-	ns	***	***
k__Fungi|p__Olpidiomycota	BS -> RS -> RO	Increase	ns	*	*
k__Fungi|p__Rozellomycota	BS -> RS -> RO	Decrease	ns	***	***
k__Fungi|p__Zoopagomycota	BS -> RS -> RO	Decrease	ns	***	***

## Sheet: Dataset S9
Dataset S9: Comparisons of differentially abundant phyla across different compartments
Hypothesis testing was carried out using ALDEx2 (Wilcox) test and corrected for multiple testing using the Benjamini-Hochberg method.
	Comparison	Taxa	diff.btw	diff.win	effect	overlap	we.ep	we.eBH	wi.ep	wi.eBH	P.adj	Significance	Method
1	BS - RS	k__Fungi|p__Basidiomycota|c__Cystobasidiomycetes|o__|f__|g__|s__|ASV_2893	0.136301	1.64481	0.0843465	0.460708	0.169721	0.99891	0.170032	0.996839	0.996839		ALDEx2
2	BS - RS	k__Fungi|p__Basidiomycota|c__Microbotryomycetes|o__Leucosporidiales|f__Leucosporidiaceae|g__Mastigobasidium|s__Mastigobasidium_sp|ASV_3111	-0.0870498	0.906829	-0.087759	0.4606	0.338774	0.978101	0.229073	0.903823	0.903823		ALDEx2
3	BS - RS	k__|p__|c__|o__|f__|g__|s__|ASV_0692	0.168348	1.42705	0.106267	0.445	0.16238	0.998667	0.186124	0.998416	0.998416		ALDEx2
4	BS - RS	k__Fungi|p__Basidiomycota|c__Agaricomycetes|o__Sebacinales|f__Sebacinaceae|g__Chaetospermum|s__Chaetospermum_chaetosporum|ASV_3112	-1.50709	3.70865	-0.375837	0.337732	3.95767e-05	0.00294005	1.18424e-05	0.000982918	0.000982918	***	ALDEx2
5	BS - RS	k__Fungi|p__Basidiomycota|c__|o__|f__|g__|s__Basidiomycota_sp|ASV_1035	-0.00946203	2.04313	-0.00573114	0.4976	0.877569	1	0.923992	1	1		ALDEx2
6	BS - RS	k__Fungi|p__Basidiomycota|c__Agaricomycetes|o__Agaricales|f__|g__|s__|ASV_2531	-0.256024	2.7219	-0.0875585	0.462507	0.128786	0.806456	0.213145	0.933361	0.933361		ALDEx2
7	BS - RS	k__|p__|c__|o__|f__|g__|s__|ASV_2458	-0.207657	0.91793	-0.20433	0.405519	0.0446496	0.489797	0.0135347	0.221872	0.221872		ALDEx2
8	BS - RS	k__Fungi|p__|c__|o__|f__|g__|s__|ASV_0815	0.393035	2.0019	0.186149	0.414917	0.0261166	0.495905	0.0170456	0.333031	0.333031		ALDEx2
9	BS - RS	k__Fungi|p__Ascomycota|c__Sordariomycetes|o__Ophiostomatales|f__Ophiostomataceae|g__Pesotum|s__Pesotum_piceae|ASV_3101	-0.166663	3.63364	-0.0465719	0.478504	0.551771	1	0.610544	1	1		ALDEx2
10	BS - RS	k__|p__|c__|o__|f__|g__|s__|ASV_3080	-0.0806921	3.97882	-0.0205563	0.4888	0.832507	1	0.806068	1	1		ALDEx2
11	BS - RS	k__Fungi|p__Basidiomycota|c__Agaricomycetes|o__Cantharellales|f__Ceratobasidiaceae|g__|s__Ceratobasidiaceae_sp|ASV_2431	-0.378634	1.47101	-0.225099	0.3926	0.0126487	0.303512	0.0025596	0.086235	0.086235		ALDEx2
12	BS - RS	k__Fungi|p__Basidiomycota|c__Agaricomycetes|o__|f__|g__|s__|ASV_2302	-0.104377	2.6536	-0.0398485	0.4822	0.669735	1	0.5446	1	1		ALDEx2
13	BS - RS	k__Fungi|p__Basidiomycota|c__Agaricomycetes|o__Agaricales|f__Psathyrellaceae|g__Coprinopsis|s__Coprinopsis_sp|ASV_2949	0.513692	1.62719	0.29162	0.3712	0.000240868	0.0222824	0.000627514	0.0306219	0.0306219	*	ALDEx2
14	BS - RS	k__|p__|c__|o__|f__|g__|s__|ASV_0470	-0.0790462	1.36269	-0.0565534	0.4748	0.555444	0.999151	0.507545	0.997624	0.997624		ALDEx2
15	BS - RS	k__Fungi|p__|c__|o__|f__|g__|s__|ASV_0591	0.100023	1.0913	0.0819444	0.461	0.171252	0.995834	0.281182	0.998667	0.998667		ALDEx2
16	BS - RS	k__Fungi|p__Basidiomycota|c__Tremellomycetes|o__Cystofilobasidiales|f__Cystofilobasidiaceae|g__Cystofilobasidium|s__Cystofilobasidium_capitatum|ASV_2481	-0.2808	1.70216	-0.154035	0.4328	0.0465579	0.511533	0.0577115	0.549737	0.549737		ALDEx2
17	BS - RS	k__Fungi|p__Basidiomycota|c__Agaricomycetes|o__Sebacinales|f__|g__|s__Sebacinales_sp|ASV_3190	-0.232079	2.12598	-0.105066	0.4558	0.254915	0.967862	0.305145	0.983155	0.983155		ALDEx2
18	BS - RS	k__Fungi|p__|c__|o__|f__|g__|s__|ASV_0619	0.237215	1.38953	0.161186	0.425115	0.0294318	0.528364	0.0332201	0.526987	0.526987		ALDEx2
19	BS - RS	k__|p__|c__|o__|f__|g__|s__|ASV_2021	-0.107863	2.52	-0.0427831	0.4754	0.463591	0.99854	0.466219	0.995345	0.995345		ALDEx2
20	BS - RS	k__|p__|c__|o__|f__|g__|s__|ASV_0617	-0.0340286	1.74565	-0.018411	0.491302	0.94518	1	0.870673	1	1		ALDEx2
21	BS - RS	k__Fungi|p__Mortierellomycota|c__|o__|f__|g__|s__|ASV_0929	-0.360619	8.85504	-0.0430209	0.4656	0.611351	0.996232	0.414183	0.982576	0.982576		ALDEx2
22	BS - RS	k__Fungi|p__|c__|o__|f__|g__|s__|ASV_2532	-0.392009	1.81238	-0.199896	0.413117	0.0268464	0.415369	0.0168717	0.2583	0.2583		ALDEx2
23	BS - RS	k__|p__|c__|o__|f__|g__|s__|ASV_2680	-0.471669	1.52111	-0.284624	0.3754	0.000736483	0.040577	0.000481591	0.0265303	0.0265303	*	ALDEx2
24	BS - RS	k__|p__|c__|o__|f__|g__|s__|ASV_2332	-0.157205	0.896114	-0.158447	0.428314	0.147115	0.808504	0.0728332	0.585147	0.585147		ALDEx2
25	BS - RS	k__Fungi|p__Basidiomycota|c__Agaricomycetes|o__Polyporales|f__Podoscyphaceae|g__Abortiporus|s__Abortiporus_biennis|ASV_3140	-0.139174	2.31016	-0.0545069	0.474905	0.470538	0.999772	0.419142	0.996301	0.996301		ALDEx2
26	BS - RS	k__|p__|c__|o__|f__|g__|s__|ASV_2654	-0.623009	2.47296	-0.227176	0.389922	0.00420062	0.161316	0.00298806	0.092779	0.092779		ALDEx2
27	BS - RS	k__|p__|c__|o__|f__|g__|s__|ASV_1833	-0.104524	3.21195	-0.0280618	0.4872	0.92276	1	0.697079	1	1		ALDEx2
28	BS - RS	k__Fungi|p__|c__|o__|f__|g__|s__|ASV_2022	-0.645227	3.65009	-0.168248	0.421516	0.0313928	0.434966	0.0287287	0.367158	0.367158		ALDEx2
29	BS - RS	k__Fungi|p__|c__|o__|f__|g__|s__|ASV_0701	0.588161	2.35364	0.203149	0.3928	0.0252981	0.48432	0.00362863	0.104427	0.104427		ALDEx2
30	BS - RS	k__Fungi|p__Basidiomycota|c__Agaricomycetes|o__Agaricales|f__Pluteaceae|g__Volvopluteus|s__Volvopluteus_gloiocephalus|ASV_2632	-0.249591	2.20197	-0.101728	0.44911	0.108368	0.744059	0.142934	0.811794	0.811794		ALDEx2
31	BS - RS	k__Fungi|p__|c__|o__|f__|g__|s__|ASV_2896	0.151477	1.61816	0.0856061	0.462707	0.300753	0.999804	0.326531	1	1		ALDEx2
32	BS - RS	k__Fungi|p__|c__|o__|f__|g__|s__|ASV_0953	-0.303962	8.45691	-0.0368213	0.460708	0.735757	0.999148	0.286191	0.934284	0.934284		ALDEx2
33	BS - RS	k__Fungi|p__Basidiomycota|c__Microbotryomycetes|o__Leucosporidiales|f__Leucosporidiaceae|g__Leucosporidium|s__Leucosporidium_intermedium|ASV_3041	0.146347	5.88843	0.0238057	0.489902	0.745053	1	0.763082	1	1		ALDEx2
34	BS - RS	k__|p__|c__|o__|f__|g__|s__|ASV_2678	0.00653878	1.63641	0.00377456	0.4981	0.868364	1	0.918798	1	1		ALDEx2
35	BS - RS	k__|p__|c__|o__|f__|g__|s__|ASV_1909	-0.272017	4.91287	-0.0524786	0.473105	0.812466	0.999595	0.576724	0.999818	0.999818		ALDEx2
36	BS - RS	k__|p__|c__|o__|f__|g__|s__|ASV_2476	-0.321168	4.37087	-0.0643247	0.461708	0.224505	0.902121	0.333385	0.990168	0.990168		ALDEx2
37	BS - RS	k__Fungi|p__|c__|o__|f__|g__|s__|ASV_0676	0.17045	1.60688	0.0930849	0.4516	0.216543	0.999552	0.190539	0.998094	0.998094		ALDEx2
38	BS - RS	k__|p__|c__|o__|f__|g__|s__|ASV_2347	0.131838	5.34707	0.0199241	0.4908	0.607443	1	0.769214	1	1		ALDEx2
39	BS - RS	k__Fungi|p__Mortierellomycota|c__Mortierellomycetes|o__Mortierellales|f__Mortierellaceae|g__Mortierella|s__Mortierella_sp|ASV_1930	-0.189913	1.49504	-0.115104	0.441512	0.17227	0.862251	0.101724	0.698712	0.698712		ALDEx2
40	BS - RS	k__Fungi|p__Basidiomycota|c__Agaricomycetes|o__Agaricales|f__|g__|s__|ASV_2950	-0.155064	2.49686	-0.0612165	0.472	0.356731	0.992874	0.368654	0.990058	0.990058		ALDEx2
41	BS - RS	k__|p__|c__|o__|f__|g__|s__|ASV_2668	0.0413702	1.77908	0.0216729	0.489302	0.805663	1	0.895035	1	1		ALDEx2
42	BS - RS	k__Fungi|p__|c__|o__|f__|g__|s__|ASV_2167	-0.202797	1.33492	-0.143265	0.436913	0.166801	0.845528	0.112459	0.718359	0.718359		ALDEx2
43	BS - RS	k__Fungi|p__Basidiomycota|c__Agaricomycetes|o__Agaricales|f__Tricholomataceae|g__Dermoloma|s__Dermoloma_cuneifolium|ASV_3296	0.00458695	4.29364	0.00124721	0.4995	0.775731	1	0.884291	1	1		ALDEx2
44	BS - RS	k__Fungi|p__Mortierellomycota|c__|o__|f__|g__|s__|ASV_1190	0.613284	7.30216	0.0820418	0.4618	0.279715	0.982483	0.22148	0.982401	0.982401		ALDEx2
45	BS - RS	k__|p__|c__|o__|f__|g__|s__|ASV_2609	-0.0948796	1.37579	-0.0659183	0.4698	0.421544	0.987991	0.391451	0.98306	0.98306		ALDEx2
46	BS - RS	k__Fungi|p__Basidiomycota|c__Agaricomycetes|o__Boletales|f__Suillaceae|g__Suillus|s__Suillus_tridentinus|ASV_2168	-0.358646	2.9529	-0.107122	0.453309	0.301854	0.972628	0.217046	0.929353	0.929353		ALDEx2
47	BS - RS	k__|p__|c__|o__|f__|g__|s__|ASV_2956	-0.149556	2.39063	-0.0559125	0.4682	0.333215	0.988663	0.407717	0.994416	0.994416		ALDEx2
48	BS - RS	k__Fungi|p__Basidiomycota|c__Agaricomycetes|o__Agaricales|f__Clavariaceae|g__|s__|ASV_2248	-0.386169	1.88838	-0.195233	0.4122	0.0101744	0.257274	0.0073099	0.154164	0.154164		ALDEx2
49	BS - RS	k__Fungi|p__Basidiomycota|c__Tremellomycetes|o__|f__|g__|s__Tremellomycetes_sp|ASV_2839	-0.613676	5.54402	-0.0999134	0.4516	0.256869	0.87071	0.230293	0.911054	0.911054		ALDEx2
50	BS - RS	k__|p__|c__|o__|f__|g__|s__|ASV_1625	-0.490544	6.51274	-0.0722122	0.4664	0.280157	0.899839	0.318093	0.969232	0.969232		ALDEx2
51	BS - RS	k__Fungi|p__Basidiomycota|c__Agaricomycetes|o__Thelephorales|f__Thelephoraceae|g__Tomentella|s__Tomentella_sp|ASV_2775	0.412392	5.64288	0.0616467	0.469906	0.398829	0.971484	0.424969	0.972194	0.972194		ALDEx2
52	BS - RS	k__Fungi|p__Chytridiomycota|c__Spizellomycetes|o__Spizellomycetales|f__Spizellomycetaceae|g__Spizellomyces|s__Spizellomyces_dolichospermus|ASV_2459	-0.25981	2.61691	-0.0889659	0.4556	0.298355	0.954597	0.239752	0.934103	0.934103		ALDEx2
53	BS - RS	k__|p__|c__|o__|f__|g__|s__|ASV_2360	-0.269879	4.4822	-0.0579503	0.4746	0.622363	0.999848	0.457267	0.997376	0.997376		ALDEx2
54	BS - RS	k__Fungi|p__Basidiomycota|c__Agaricomycetes|o__Thelephorales|f__Thelephoraceae|g__Tomentella|s__Tomentella_sp|ASV_2710	0.133119	1.60986	0.0801161	0.463107	0.421988	1	0.357727	0.999292	0.999292		ALDEx2
55	BS - RS	k__|p__|c__|o__|f__|g__|s__|ASV_3125	-1.35215	2.54754	-0.481597	0.2926	2.14937e-07	3.56796e-05	8.81018e-09	1.46249e-06	1.46249e-06	***	ALDEx2
56	BS - RS	k__Fungi|p__Basidiomycota|c__Agaricomycetes|o__Agaricales|f__|g__|s__|ASV_2809	-0.107381	2.27923	-0.0416825	0.479904	0.597621	1	0.589546	0.997813	0.997813		ALDEx2
57	BS - RS	k__Fungi|p__Basidiomycota|c__Agaricomycetes|o__Agaricales|f__Pluteaceae|g__Volvariella|s__|ASV_2578	-0.293074	1.94815	-0.141965	0.438112	0.0412559	0.483586	0.0708315	0.589683	0.589683		ALDEx2
58	BS - RS	k__|p__|c__|o__|f__|g__|s__|ASV_2266	-0.412581	6.46486	-0.059607	0.468	0.466694	0.961482	0.407396	0.939666	0.939666		ALDEx2
59	BS - RS	k__Fungi|p__|c__|o__|f__|g__|s__|ASV_2265	-0.178812	2.70724	-0.0652815	0.469906	0.394867	0.991471	0.358793	0.980459	0.980459		ALDEx2
60	BS - RS	k__Fungi|p__Basidiomycota|c__Microbotryomycetes|o__Sporidiobolales|f__Sporidiobolaceae|g__Sporobolomyces|s__Sporobolomyces_sp|ASV_2242	0.0277824	3.06614	0.00768206	0.495901	0.840826	1	0.881017	1	1		ALDEx2
61	BS - RS	k__|p__|c__|o__|f__|g__|s__|ASV_2900	-0.503102	2.07382	-0.225608	0.39772	0.0193648	0.339393	0.00840681	0.170358	0.170358		ALDEx2
62	BS - RS	k__Fungi|p__Basidiomycota|c__Pucciniomycetes|o__Pucciniales|f__Pucciniaceae|g__Uromyces|s__Uromyces_sp|ASV_3189	-0.0659637	2.5253	-0.0230377	0.490902	0.643805	1	0.863044	1	1		ALDEx2
63	BS - RS	k__Fungi|p__Basidiomycota|c__Agaricomycetes|o__Agaricales|f__|g__|s__Agaricales_sp|ASV_2993	-0.22893	1.3868	-0.157709	0.4308	0.0519384	0.523798	0.0984399	0.660653	0.660653		ALDEx2
64	BS - RS	k__|p__|c__|o__|f__|g__|s__|ASV_2804	-0.224566	5.20834	-0.0362744	0.476305	0.778969	0.996909	0.619149	0.9558	0.9558		ALDEx2
65	BS - RS	k__Fungi|p__Basidiomycota|c__Ustilaginomycetes|o__Ustilaginales|f__Ustilaginaceae|g__Ustilago|s__Ustilago_scrobiculata|ASV_0592	0.0956055	2.15229	0.038351	0.4808	0.345194	0.999896	0.512615	1	1		ALDEx2
66	BS - RS	k__Fungi|p__Blastocladiomycota|c__|o__|f__|g__|s__Blastocladiomycota_sp|ASV_1440	1.6845	5.23838	0.287761	0.3618	0.000720794	0.0382295	0.000147096	0.0150936	0.0150936	*	ALDEx2
67	BS - RS	k__|p__|c__|o__|f__|g__|s__|ASV_2655	-0.259382	1.43613	-0.164053	0.4196	0.0410568	0.472106	0.0328824	0.376324	0.376324		ALDEx2
68	BS - RS	k__Fungi|p__|c__|o__|f__|g__|s__|ASV_2776	-0.33247	2.32061	-0.137782	0.437912	0.166028	0.854234	0.119069	0.751464	0.751464		ALDEx2
69	BS - RS	k__|p__|c__|o__|f__|g__|s__|ASV_2411	-0.387606	2.85613	-0.10287	0.439912	0.300362	0.949943	0.101847	0.708407	0.708407		ALDEx2
70	BS - RS	k__|p__|c__|o__|f__|g__|s__|ASV_2413	0.0969627	5.60078	0.0152761	0.492501	0.806614	0.997055	0.896047	1	1		ALDEx2
71	BS - RS	k__Fungi|p__|c__|o__|f__|g__|s__|ASV_2951	0.249695	4.86685	0.0458883	0.4756	0.578081	1	0.508453	1	1		ALDEx2
72	BS - RS	k__Fungi|p__Glomeromycota|c__Glomeromycetes|o__Glomerales|f__Glomeraceae|g__Septoglomus|s__Septoglomus_viscosum|ASV_2461	-0.0639414	1.73618	-0.0334251	0.4856	0.89859	1	0.654157	0.998431	0.998431		ALDEx2
73	BS - RS	k__Fungi|p__Basidiomycota|c__Microbotryomycetes|o__|f__|g__|s__Microbotryomycetes_sp|ASV_3216	0.417922	5.98722	0.0654889	0.468906	0.514534	0.998777	0.439495	0.998953	0.998953		ALDEx2
74	BS - RS	k__Fungi|p__Basidiomycota|c__Agaricomycetes|o__Polyporales|f__Fomitopsidaceae|g__|s__Fomitopsidaceae_sp|ASV_2491	-0.772743	3.82243	-0.178611	0.405519	0.0924665	0.629236	0.00662251	0.143981	0.143981		ALDEx2
75	BS - RS	k__Fungi|p__|c__|o__|f__|g__|s__|ASV_0931	-0.0812422	1.79696	-0.0399203	0.481504	0.910855	1	0.641262	0.999699	0.999699		ALDEx2
76	BS - RS	k__|p__|c__|o__|f__|g__|s__|ASV_2994	-0.409609	4.01909	-0.0885741	0.4596	0.450741	0.974776	0.266491	0.93752	0.93752		ALDEx2
77	BS - RS	k__Fungi|p__Basidiomycota|c__Agaricomycetes|o__Agaricales|f__Clavariaceae|g__Clavaria|s__Clavaria_sp|ASV_2857	-0.0391713	4.79153	-0.00766759	0.4962	0.802563	0.999309	0.911993	1	1		ALDEx2
78	BS - RS	k__Fungi|p__Basidiomycota|c__Agaricomycetes|o__Agaricales|f__Tricholomataceae|g__Lepista|s__Lepista_sordida|ASV_3217	0.259627	6.32153	0.0406639	0.482	0.635991	1	0.613732	1	1		ALDEx2
79	BS - RS	k__|p__|c__|o__|f__|g__|s__|ASV_2735	-0.0756638	4.50407	-0.0154652	0.493101	0.867466	0.99987	0.893154	1	1		ALDEx2
80	BS - RS	k__Fungi|p__Basidiomycota|c__Agaricomycetes|o__Thelephorales|f__Thelephoraceae|g__|s__Thelephoraceae_sp|ASV_2777	-0.395708	2.60196	-0.133087	0.4378	0.212082	0.878294	0.118934	0.743901	0.743901		ALDEx2
81	BS - RS	k__Fungi|p__Chytridiomycota|c__Rhizophlyctidomycetes|o__Rhizophlyctidales|f__Rhizophlyctidaceae|g__Rhizophlyctis|s__Rhizophlyctis_rosea|ASV_2460	-0.0510381	2.00723	-0.0242259	0.490102	0.737474	1	0.645007	0.999581	0.999581		ALDEx2
82	BS - RS	k__|p__|c__|o__|f__|g__|s__|ASV_2377	0.0530595	3.14415	0.0135227	0.491902	0.733659	1	0.733212	1	1		ALDEx2
83	BS - RS	k__|p__|c__|o__|f__|g__|s__|ASV_0974	-0.436805	7.49757	-0.0547816	0.473905	0.515283	0.966477	0.524875	0.979627	0.979627		ALDEx2
84	BS - RS	k__Fungi|p__|c__|o__|f__|g__|s__|ASV_3218	-0.188175	1.91267	-0.0912909	0.460308	0.246908	0.9313	0.188057	0.864614	0.864614		ALDEx2
85	BS - RS	k__|p__|c__|o__|f__|g__|s__|ASV_2361	0.112701	5.97358	0.0179771	0.490502	0.707832	1	0.747629	1	1		ALDEx2
86	BS - RS	k__Fungi|p__Basidiomycota|c__Agaricomycetes|o__Agaricales|f__Clavariaceae|g__Clavaria|s__|ASV_2533	-0.298275	3.01365	-0.0945555	0.462108	0.171536	0.849642	0.37766	0.98988	0.98988		ALDEx2
87	BS - RS	k__Fungi|p__|c__|o__|f__|g__|s__|ASV_3141	0.0753567	2.13313	0.0315186	0.484503	0.396739	0.999552	0.590788	1	1		ALDEx2
88	BS - RS	k__|p__|c__|o__|f__|g__|s__|ASV_1911	-0.0122555	5.79848	-0.00234684	0.4983	0.795821	0.997027	0.884676	1	1		ALDEx2
89	BS - RS	k__Fungi|p__|c__|o__|f__|g__|s__|ASV_2778	0.0382715	2.23244	0.0156744	0.492501	0.850502	1	0.807724	1	1		ALDEx2
90	BS - RS	k__Fungi|p__Glomeromycota|c__Glomeromycetes|o__Glomerales|f__|g__|s__|ASV_2506	-0.420655	2.85856	-0.127313	0.432314	0.0689898	0.576334	0.0611541	0.542647	0.542647		ALDEx2
91	BS - RS	k__|p__|c__|o__|f__|g__|s__|ASV_2561	-0.0359557	4.31434	-0.00674916	0.4964	0.771745	0.999378	0.83193	1	1		ALDEx2
92	BS - RS	k__|p__|c__|o__|f__|g__|s__|ASV_0475	0.0381103	3.70067	0.00877733	0.495	0.742727	1	0.91482	1	1		ALDEx2
93	BS - RS	k__|p__|c__|o__|f__|g__|s__|ASV_1036	-0.260738	4.29326	-0.0576125	0.462707	0.487005	0.970028	0.310501	0.970552	0.970552		ALDEx2
94	BS - RS	k__Fungi|p__Basidiomycota|c__|o__|f__|g__|s__|ASV_1952	-0.267269	2.00944	-0.117248	0.446111	0.141713	0.775916	0.152066	0.789144	0.789144		ALDEx2
95	BS - RS	k__Fungi|p__Mortierellomycota|c__Mortierellomycetes|o__Mortierellales|f__Mortierellaceae|g__Mortierella|s__Mortierella_sp|ASV_1592	-0.296389	5.48858	-0.0464132	0.4728	0.612207	0.966952	0.55894	0.950943	0.950943		ALDEx2
96	BS - RS	k__Fungi|p__Basidiomycota|c__Agaricomycetes|o__Russulales|f__Russulaceae|g__Lactifluus|s__Lactifluus_bertillonii|ASV_2867	0.2401	6.7477	0.0326369	0.4834	0.752944	1	0.799013	0.9999	0.9999		ALDEx2
97	BS - RS	k__Fungi|p__Chytridiomycota|c__|o__|f__|g__|s__Chytridiomycota_sp|ASV_2267	-0.34848	3.48745	-0.0861159	0.4544	0.168034	0.811638	0.164837	0.854381	0.854381		ALDEx2
98	BS - RS	k__|p__|c__|o__|f__|g__|s__|ASV_0485	0.0402779	1.42446	0.029411	0.4878	0.556994	1	0.719754	1	1		ALDEx2
99	BS - RS	k__Fungi|p__|c__|o__|f__|g__|s__|ASV_0675	0.0377402	4.22138	0.00862227	0.495701	0.832776	0.998327	0.905037	1	1		ALDEx2
100	BS - RS	k__Fungi|p__Chytridiomycota|c__|o__|f__|g__|s__Chytridiomycota_sp|ASV_2311	-0.274459	2.93865	-0.0794993	0.4608	0.228246	0.852747	0.286885	0.929504	0.929504		ALDEx2
101	BS - RS	k__|p__|c__|o__|f__|g__|s__|ASV_1200	0.600603	5.05011	0.107767	0.4488	0.276866	0.988011	0.207695	0.993062	0.993062		ALDEx2
102	BS - RS	k__Fungi|p__Basidiomycota|c__Agaricomycetes|o__Boletales|f__Paxillaceae|g__Paxillus|s__Paxillus_olivellus|ASV_2301	0.078531	5.33038	0.0126097	0.493701	0.768668	1	0.809695	1	1		ALDEx2
103	BS - RS	k__Fungi|p__|c__|o__|f__|g__|s__|ASV_2041	-0.222366	4.93322	-0.0370311	0.4782	0.755442	0.998377	0.571481	0.999154	0.999154		ALDEx2
104	BS - RS	k__|p__|c__|o__|f__|g__|s__|ASV_1659	-0.649576	5.97874	-0.100957	0.453309	0.288031	0.861781	0.239755	0.878623	0.878623		ALDEx2
105	BS - RS	k__Fungi|p__Mucoromycota|c__Mucoromycetes|o__Mucorales|f__Cunninghamellaceae|g__Cunninghamella|s__Cunninghamella_binariae|ASV_2657	-0.269759	1.64758	-0.143464	0.431114	0.0649002	0.563202	0.0511658	0.481949	0.481949		ALDEx2
106	BS - RS	k__|p__|c__|o__|f__|g__|s__|ASV_2615	0.196198	2.13541	0.0798892	0.458308	0.306649	0.999489	0.314221	0.999162	0.999162		ALDEx2
107	BS - RS	k__Fungi|p__|c__|o__|f__|g__|s__|ASV_0208	0.0349176	5.19962	0.00578306	0.4972	0.670007	0.98607	0.739815	0.989326	0.989326		ALDEx2
108	BS - RS	k__|p__|c__|o__|f__|g__|s__|ASV_2334	-0.141566	3.25139	-0.035276	0.4824	0.77451	1	0.633049	1	1		ALDEx2
109	BS - RS	k__Fungi|p__Mortierellomycota|c__Mortierellomycetes|o__Mortierellales|f__Mortierellaceae|g__Mortierella|s__Mortierella_beljakovae|ASV_1343	0.811264	6.63221	0.113697	0.4456	0.245862	0.943779	0.204133	0.94311	0.94311		ALDEx2
110	BS - RS	k__Fungi|p__|c__|o__|f__|g__|s__|ASV_3163	-0.305442	4.3039	-0.0601531	0.469306	0.276447	0.901346	0.285442	0.948303	0.948303		ALDEx2
111	BS - RS	k__Fungi|p__Basidiomycota|c__Agaricomycetes|o__|f__|g__|s__|ASV_2810	0.358129	5.55745	0.0599526	0.4716	0.605666	0.997664	0.455369	1	1		ALDEx2
112	BS - RS	k__Fungi|p__Chytridiomycota|c__Spizellomycetes|o__Spizellomycetales|f__|g__|s__Spizellomycetales_sp|ASV_1443	0.269403	4.26089	0.050616	0.472106	0.505104	1	0.449598	1	1		ALDEx2
113	BS - RS	k__Fungi|p__Basidiomycota|c__Agaricomycetes|o__Thelephorales|f__Thelephoraceae|g__Tomentella|s__Tomentella_sp|ASV_2711	-0.485336	6.08897	-0.0673869	0.466507	0.325182	0.877508	0.406773	0.926269	0.926269		ALDEx2
114	BS - RS	k__Fungi|p__|c__|o__|f__|g__|s__|ASV_2389	-0.0535926	3.06145	-0.0144835	0.4928	0.817664	1	0.808037	1	1		ALDEx2
115	BS - RS	k__Fungi|p__Glomeromycota|c__Archaeosporomycetes|o__Archaeosporales|f__Archaeosporaceae|g__|s__|ASV_2856	-0.345624	6.467	-0.0487791	0.476505	0.616784	0.988514	0.632258	0.99636	0.99636		ALDEx2
116	BS - RS	k__Fungi|p__|c__|o__|f__|g__|s__|ASV_2895	1.01198	4.75517	0.183197	0.406519	0.0275778	0.454374	0.0102811	0.218986	0.218986		ALDEx2
117	BS - RS	k__Fungi|p__|c__|o__|f__|g__|s__|ASV_2786	1.06743	3.641	0.246291	0.378	0.00133362	0.058858	0.000612009	0.0285085	0.0285085	*	ALDEx2
118	BS - RS	k__Fungi|p__Basidiomycota|c__Agaricomycetes|o__Agaricales|f__Clavariaceae|g__Clavaria|s__Clavaria_sp|ASV_2953	0.225183	5.02681	0.0383478	0.4804	0.646693	1	0.559783	1	1		ALDEx2
119	BS - RS	k__Fungi|p__Basidiomycota|c__Agaricomycetes|o__Thelephorales|f__Thelephoraceae|g__Thelephora|s__Thelephora_sp|ASV_2779	0.262309	5.62556	0.0430275	0.479904	0.59443	0.999859	0.489444	1	1		ALDEx2
120	BS - RS	k__Fungi|p__Basidiomycota|c__|o__|f__|g__|s__|ASV_3293	-0.377063	4.54898	-0.0750898	0.463307	0.42977	0.933144	0.353205	0.965423	0.965423		ALDEx2
121	BS - RS	k__Fungi|p__Basidiomycota|c__Agaricomycetes|o__Thelephorales|f__Thelephoraceae|g__Tomentella|s__Tomentella_sp|ASV_2811	0.700301	5.85042	0.110953	0.453	0.210513	0.910313	0.1534	0.908693	0.908693		ALDEx2
122	BS - RS	k__Fungi|p__|c__|o__|f__|g__|s__|ASV_2307	-0.486102	4.65472	-0.0888181	0.456509	0.343109	0.891359	0.222726	0.887942	0.887942		ALDEx2
123	BS - RS	k__Fungi|p__|c__|o__|f__|g__|s__|ASV_1409	-0.0322569	3.24837	-0.00790672	0.495501	0.812329	0.997997	0.855492	1	1		ALDEx2
124	BS - RS	k__Fungi|p__Mortierellomycota|c__Mortierellomycetes|o__Mortierellales|f__Mortierellaceae|g__Mortierella|s__Mortierella_elongata|ASV_1723	-0.831921	5.75133	-0.130209	0.4366	0.214979	0.784336	0.147608	0.72205	0.72205		ALDEx2
125	BS - RS	k__Fungi|p__Basidiomycota|c__Agaricomycetes|o__Agaricales|f__Clavariaceae|g__Hodophilus|s__Hodophilus_tenuicystidiatus|ASV_3247	0.306287	5.26246	0.0516689	0.4734	0.615317	0.989446	0.611235	0.992829	0.992829		ALDEx2
126	BS - RS	k__Fungi|p__Basidiomycota|c__|o__|f__|g__|s__|ASV_2042	-0.242812	5.78753	-0.0365679	0.480904	0.699377	0.989624	0.63127	0.989063	0.989063		ALDEx2
127	BS - RS	k__Fungi|p__|c__|o__|f__|g__|s__|ASV_1488	-0.146517	6.03133	-0.0183065	0.488702	0.670372	0.979204	0.681013	0.979073	0.979073		ALDEx2
128	BS - RS	k__Fungi|p__Mortierellomycota|c__Mortierellomycetes|o__Mortierellales|f__|g__|s__|ASV_2390	0.274893	5.82827	0.0416636	0.482	0.549435	0.997453	0.505131	0.99985	0.99985		ALDEx2
129	BS - RS	k__|p__|c__|o__|f__|g__|s__|ASV_0151	0.079862	5.95887	0.0124932	0.493	0.705134	0.99502	0.712908	0.995852	0.995852		ALDEx2
130	BS - RS	k__|p__|c__|o__|f__|g__|s__|ASV_1362	0.0333168	3.72844	0.00720441	0.496501	0.479418	0.996047	0.793603	1	1		ALDEx2
131	BS - RS	k__|p__|c__|o__|f__|g__|s__|ASV_2024	0.398336	3.67724	0.0929191	0.453109	0.259823	0.982111	0.183878	0.976551	0.976551		ALDEx2
132	BS - RS	k__|p__|c__|o__|f__|g__|s__|ASV_1510	0.362417	4.2025	0.0763007	0.4616	0.282533	0.970486	0.236542	0.987296	0.987296		ALDEx2
133	BS - RS	k__Fungi|p__Chytridiomycota|c__Rhizophydiomycetes|o__Rhizophydiales|f__Rhizophydiaceae|g__Rhizophydium|s__Rhizophydium_globosum|ASV_1055	0.603595	5.76102	0.094719	0.45031	0.224494	0.875439	0.263884	0.877652	0.877652		ALDEx2
134	BS - RS	k__|p__|c__|o__|f__|g__|s__|ASV_1958	0.086788	6.08328	0.0108481	0.4954	0.749841	0.998456	0.747741	0.999335	0.999335		ALDEx2
135	BS - RS	k__Fungi|p__Chytridiomycota|c__Rhizophydiomycetes|o__Rhizophydiales|f__|g__|s__Rhizophydiales_sp|ASV_2331	1.30572	4.795	0.237718	0.384923	0.00637472	0.155327	0.00368136	0.088852	0.088852		ALDEx2
136	BS - RS	k__|p__|c__|o__|f__|g__|s__|ASV_2023	0.149837	5.48005	0.0244237	0.487303	0.671284	0.991225	0.690648	0.990813	0.990813		ALDEx2
137	BS - RS	k__|p__|c__|o__|f__|g__|s__|ASV_2391	-0.854592	4.58535	-0.157932	0.4136	0.0958088	0.588114	0.0274364	0.325978	0.325978		ALDEx2
138	BS - RS	k__|p__|c__|o__|f__|g__|s__|ASV_1295	0.488264	4.92422	0.0853889	0.4534	0.26386	0.959605	0.207688	0.977517	0.977517		ALDEx2
139	BS - RS	k__Fungi|p__|c__|o__|f__|g__|s__|ASV_2362	-0.173742	5.40297	-0.027393	0.4866	0.719637	0.98324	0.686301	0.992765	0.992765		ALDEx2
140	BS - RS	k__Fungi|p__Basidiomycota|c__|o__|f__|g__|s__|ASV_0604	0.15369	3.58066	0.0348081	0.478904	0.608677	0.996085	0.648728	1	1		ALDEx2
141	BS - RS	k__|p__|c__|o__|f__|g__|s__|ASV_2952	0.0933094	5.23797	0.0158981	0.4916	0.743072	0.99449	0.742394	0.990628	0.990628		ALDEx2
142	BS - RS	k__Fungi|p__Chytridiomycota|c__Rhizophydiomycetes|o__Rhizophydiales|f__|g__|s__|ASV_2333	-0.115853	5.30965	-0.0185759	0.492701	0.752126	0.975622	0.674255	0.952473	0.952473		ALDEx2
143	BS - RS	k__|p__|c__|o__|f__|g__|s__|ASV_1383	0.340121	4.92498	0.0582642	0.47	0.564037	0.997756	0.384434	0.998851	0.998851		ALDEx2
144	BS - RS	k__Fungi|p__|c__|o__|f__|g__|s__|ASV_1072	-0.0881707	5.02643	-0.0177011	0.4928	0.693363	0.964944	0.743946	0.974375	0.974375		ALDEx2
145	BS - RS	k__Fungi|p__Basidiomycota|c__Agaricomycetes|o__Agaricales|f__Strophariaceae|g__Pholiota|s__Pholiota_abieticola|ASV_3042	0.59153	4.84036	0.10528	0.446111	0.262668	0.93515	0.228425	0.932444	0.932444		ALDEx2
146	BS - RS	k__|p__|c__|o__|f__|g__|s__|ASV_1998	0.516756	4.51488	0.102823	0.444511	0.160236	0.843691	0.0961217	0.789921	0.789921		ALDEx2
147	BS - RS	k__Fungi|p__|c__|o__|f__|g__|s__|ASV_1953	0.217186	4.40831	0.0406611	0.4778	0.589849	0.997398	0.50422	0.997213	0.997213		ALDEx2
148	BS - RS	k__Fungi|p__Basidiomycota|c__Agaricostilbomycetes|o__Agaricostilbales|f__Agaricostilbaceae|g__Sterigmatomyces|s__Sterigmatomyces_halophilus|ASV_1935	1.25328	4.58544	0.238922	0.3872	0.0103364	0.184914	0.00293443	0.0732433	0.0732433		ALDEx2
149	BS - RS	k__Fungi|p__|c__|o__|f__|g__|s__|ASV_1564	-0.101228	4.12656	-0.0199647	0.487103	0.696932	0.981826	0.724613	0.986901	0.986901		ALDEx2
150	BS - RS	k__Fungi|p__Chytridiomycota|c__Spizellomycetes|o__Spizellomycetales|f__Spizellomycetaceae|g__|s__|ASV_2467	0.680201	4.82622	0.124385	0.434913	0.190971	0.790694	0.116541	0.675163	0.675163		ALDEx2
151	BS - RS	k__|p__|c__|o__|f__|g__|s__|ASV_2802	0.0506857	5.18717	0.00865692	0.4956	0.780385	0.992846	0.725256	0.996204	0.996204		ALDEx2
152	BS - RS	k__|p__|c__|o__|f__|g__|s__|ASV_2045	0.406873	4.38759	0.0791613	0.4572	0.416277	0.958729	0.308468	0.971607	0.971607		ALDEx2
153	BS - RS	k__Fungi|p__|c__|o__|f__|g__|s__|ASV_2109	0.424462	4.5178	0.0851951	0.4568	0.357795	0.968353	0.29841	0.976762	0.976762		ALDEx2
154	BS - RS	k__|p__|c__|o__|f__|g__|s__|ASV_1096	0.166121	5.29567	0.0281656	0.486	0.695226	0.996519	0.696612	0.998548	0.998548		ALDEx2
155	BS - RS	k__Fungi|p__Ascomycota|c__Orbiliomycetes|o__Orbiliales|f__|g__|s__|ASV_3268	0.013014	4.97112	0.00203397	0.4994	0.77923	0.988018	0.805339	0.99027	0.99027		ALDEx2
156	BS - RS	k__Fungi|p__Chytridiomycota|c__|o__|f__|g__|s__Chytridiomycota_sp|ASV_1597	0.0724877	4.81681	0.0134887	0.4924	0.782065	0.992835	0.772437	0.999134	0.999134		ALDEx2
157	BS - RS	k__|p__|c__|o__|f__|g__|s__|ASV_2510	-0.163337	4.63658	-0.0308301	0.483703	0.625011	0.956194	0.636662	0.963059	0.963059		ALDEx2
158	BS - RS	k__Fungi|p__|c__|o__|f__|g__|s__|ASV_1910	0.25812	4.94831	0.0452259	0.478304	0.527139	0.967175	0.526458	0.966865	0.966865		ALDEx2
159	BS - RS	k__Fungi|p__Basidiomycota|c__Agaricomycetes|o__Polyporales|f__Fomitopsidaceae|g__|s__Fomitopsidaceae_sp|ASV_2552	0.439284	4.79136	0.0781412	0.4598	0.373452	0.913953	0.308527	0.843163	0.843163		ALDEx2
160	BS - RS	k__|p__|c__|o__|f__|g__|s__|ASV_1421	0.173119	4.50146	0.0321362	0.479904	0.591087	0.977102	0.623713	0.983011	0.983011		ALDEx2
161	BS - RS	k__Fungi|p__|c__|o__|f__|g__|s__|ASV_1955	-0.118054	4.59785	-0.0235233	0.488302	0.747086	0.983173	0.730853	0.982545	0.982545		ALDEx2
162	BS - RS	k__|p__|c__|o__|f__|g__|s__|ASV_1487	0.244502	4.39129	0.0461969	0.4756	0.587152	0.991367	0.519169	0.990304	0.990304		ALDEx2
163	BS - RS	k__Fungi|p__|c__|o__|f__|g__|s__|ASV_1491	-0.174596	4.5503	-0.0309056	0.4832	0.649656	0.969294	0.626809	0.97614	0.97614		ALDEx2
164	BS - RS	k__Fungi|p__|c__|o__|f__|g__|s__|ASV_2528	0.180411	4.61141	0.034707	0.4838	0.639053	0.969872	0.639114	0.962348	0.962348		ALDEx2
165	BS - RS	k__|p__|c__|o__|f__|g__|s__|ASV_1091	-0.0901231	4.48536	-0.0179004	0.489102	0.762663	0.9647	0.730767	0.959808	0.959808		ALDEx2
166	BS - RS	k__Fungi|p__|c__|o__|f__|g__|s__|ASV_1384	-0.0896872	4.55573	-0.0166898	0.490902	0.687486	0.948476	0.662224	0.936207	0.936207		ALDEx2
167	BS - RO	k__Fungi|p__Basidiomycota|c__Agaricomycetes|o__Boletales|f__Paxillaceae|g__Paxillus|s__Paxillus_olivellus|ASV_2301	7.71815	5.85513	1.23878	0.0911818	0	0	0	0	0	***	ALDEx2
168	BS - RO	k__|p__|c__|o__|f__|g__|s__|ASV_2021	2.56295	3.15053	0.713917	0.230554	2.24907e-14	9.83431e-14	1.2838e-13	6.31359e-13	6.31359e-13	***	ALDEx2
169	BS - RO	k__Fungi|p__Basidiomycota|c__Microbotryomycetes|o__Leucosporidiales|f__Leucosporidiaceae|g__Mastigobasidium|s__Mastigobasidium_sp|ASV_3111	-0.351341	1.79768	-0.166558	0.4336	0.0673302	0.145019	0.0631996	0.138994	0.138994		ALDEx2
170	BS - RO	k__Fungi|p__Mortierellomycota|c__Mortierellomycetes|o__Mortierellales|f__Mortierellaceae|g__Mortierella|s__Mortierella_beljakovae|ASV_1343	6.43603	7.92428	0.792595	0.2054	0	0	2.58994e-15	1.42185e-14	1.42185e-14	***	ALDEx2
171	BS - RO	k__Fungi|p__Basidiomycota|c__Agaricomycetes|o__Agaricales|f__Tricholomataceae|g__Dermoloma|s__Dermoloma_cuneifolium|ASV_3296	3.18439	5.12535	0.586405	0.242352	3.25039e-12	1.20263e-11	2.22872e-12	9.5444e-12	9.5444e-12	***	ALDEx2
172	BS - RO	k__Fungi|p__Basidiomycota|c__Agaricomycetes|o__Sebacinales|f__Sebacinaceae|g__Chaetospermum|s__Chaetospermum_chaetosporum|ASV_3112	0.0294398	3.78947	0.0067837	0.4968	0.897727	1	0.935819	1	1		ALDEx2
173	BS - RO	k__Fungi|p__Basidiomycota|c__Agaricomycetes|o__Thelephorales|f__Thelephoraceae|g__Tomentella|s__Tomentella_sp|ASV_2710	4.44709	2.46064	1.57262	0.0694	0	0	0	0	0	***	ALDEx2
174	BS - RO	k__Fungi|p__Basidiomycota|c__Pucciniomycetes|o__Pucciniales|f__Pucciniaceae|g__Uromyces|s__Uromyces_sp|ASV_3189	4.54387	2.95104	1.47073	0.0548	0	0	0	0	0	***	ALDEx2
175	BS - RO	k__Fungi|p__Basidiomycota|c__Cystobasidiomycetes|o__|f__|g__|s__|ASV_2893	-2.18375	2.433	-0.806259	0.1636	9.75371e-22	3.6942e-21	9.52771e-21	4.10207e-20	4.10207e-20	***	ALDEx2
176	BS - RO	k__Fungi|p__Chytridiomycota|c__Rhizophydiomycetes|o__Rhizophydiales|f__|g__|s__Rhizophydiales_sp|ASV_2331	7.64857	5.8247	1.19699	0.1034	0	0	0	0	0	***	ALDEx2
177	BS - RO	k__Fungi|p__|c__|o__|f__|g__|s__|ASV_2265	-0.887357	5.549	-0.135957	0.440312	0.591555	0.923392	0.0707583	0.154523	0.154523		ALDEx2
178	BS - RO	k__Fungi|p__Basidiomycota|c__Agaricomycetes|o__|f__|g__|s__|ASV_2302	-0.284679	4.34328	-0.0557081	0.475505	0.0986866	0.209204	0.473144	0.913026	0.913026		ALDEx2
179	BS - RO	k__|p__|c__|o__|f__|g__|s__|ASV_2377	5.62695	3.21563	1.71497	0.032	0	0	0	0	0	***	ALDEx2
180	BS - RO	k__Fungi|p__|c__|o__|f__|g__|s__|ASV_2895	6.82389	5.43148	1.13015	0.1138	0	0	0	0	0	***	ALDEx2
181	BS - RO	k__|p__|c__|o__|f__|g__|s__|ASV_0692	-2.31005	2.61376	-0.774285	0.1638	5.47358e-22	2.10437e-21	1.75658e-19	7.06894e-19	7.06894e-19	***	ALDEx2
182	BS - RO	k__|p__|c__|o__|f__|g__|s__|ASV_2654	-0.862781	4.20393	-0.172473	0.4162	0.00560919	0.012841	0.0150634	0.0345875	0.0345875	*	ALDEx2
183	BS - RO	k__Fungi|p__Basidiomycota|c__Tremellomycetes|o__Cystofilobasidiales|f__Cystofilobasidiaceae|g__Cystofilobasidium|s__Cystofilobasidium_capitatum|ASV_2481	-2.05405	3.16242	-0.526465	0.2652	1.67517e-12	5.12005e-12	2.2833e-11	7.04165e-11	7.04165e-11	***	ALDEx2
184	BS - RO	k__Fungi|p__Chytridiomycota|c__Spizellomycetes|o__Spizellomycetales|f__Spizellomycetaceae|g__|s__|ASV_2467	4.35557	6.57967	0.639881	0.2196	1.97498e-14	8.00195e-14	6.34602e-13	2.53643e-12	2.53643e-12	***	ALDEx2
185	BS - RO	k__|p__|c__|o__|f__|g__|s__|ASV_1421	3.26478	5.66036	0.510597	0.233753	1.30714e-11	4.75243e-11	1.46254e-10	5.16063e-10	5.16063e-10	***	ALDEx2
186	BS - RO	k__Fungi|p__|c__|o__|f__|g__|s__|ASV_1910	4.68606	6.60635	0.690349	0.2012	4.71845e-16	2.25289e-15	7.53876e-14	3.42271e-13	3.42271e-13	***	ALDEx2
187	BS - RO	k__|p__|c__|o__|f__|g__|s__|ASV_2458	-2.26394	2.11923	-0.942461	0.1398	1.16027e-25	4.94182e-25	3.08307e-23	1.53715e-22	1.53715e-22	***	ALDEx2
188	BS - RO	k__|p__|c__|o__|f__|g__|s__|ASV_2668	1.58223	3.59637	0.37092	0.367926	1.94365e-05	5.00996e-05	0.000354377	0.000909669	0.000909669	***	ALDEx2
189	BS - RO	k__Fungi|p__Basidiomycota|c__|o__|f__|g__|s__Basidiomycota_sp|ASV_1035	-4.23675	2.55707	-1.65095	0.0164	1.83022e-45	1.61529e-44	1.41231e-40	3.21035e-39	3.21035e-39	***	ALDEx2
190	BS - RO	k__Fungi|p__Basidiomycota|c__Agaricomycetes|o__Agaricales|f__|g__|s__|ASV_2531	-7.76805	3.56042	-2.13218	0.00220019	1.76824e-73	2.75146e-71	5.58928e-43	9.04572e-41	9.04572e-41	***	ALDEx2
191	BS - RO	k__Fungi|p__Ascomycota|c__Sordariomycetes|o__Ophiostomatales|f__Ophiostomataceae|g__Pesotum|s__Pesotum_piceae|ASV_3101	-4.19595	4.15258	-0.971318	0.129374	4.26157e-28	2.03413e-27	4.75186e-24	2.48324e-23	2.48324e-23	***	ALDEx2
192	BS - RO	k__Fungi|p__Basidiomycota|c__|o__|f__|g__|s__|ASV_3293	5.0511	5.04112	0.905935	0.15057	0	0	0	0	0	***	ALDEx2
193	BS - RO	k__Fungi|p__Basidiomycota|c__Agaricomycetes|o__Cantharellales|f__Ceratobasidiaceae|g__|s__Ceratobasidiaceae_sp|ASV_2431	-5.13242	2.65828	-1.87825	0.00959812	3.14276e-53	5.20921e-52	4.84914e-41	1.36981e-39	1.36981e-39	***	ALDEx2
194	BS - RO	k__|p__|c__|o__|f__|g__|s__|ASV_1510	4.7762	5.56729	0.79669	0.1922	0	0	2.77556e-17	1.7302e-16	1.7302e-16	***	ALDEx2
195	BS - RO	k__|p__|c__|o__|f__|g__|s__|ASV_3080	-3.24934	4.53255	-0.668931	0.215157	1.12112e-19	3.99825e-19	2.02407e-15	6.79185e-15	6.79185e-15	***	ALDEx2
196	BS - RO	k__Fungi|p__|c__|o__|f__|g__|s__|ASV_0591	-1.98078	2.79157	-0.619318	0.2132	1.452e-19	5.0881e-19	3.48707e-15	1.1599e-14	1.1599e-14	***	ALDEx2
197	BS - RO	k__|p__|c__|o__|f__|g__|s__|ASV_1659	2.76751	6.73196	0.372489	0.3466	6.03117e-06	1.64238e-05	3.89575e-05	0.00010604	0.00010604	***	ALDEx2
198	BS - RO	k__Fungi|p__Basidiomycota|c__Agaricomycetes|o__Agaricales|f__Strophariaceae|g__Pholiota|s__Pholiota_abieticola|ASV_3042	5.97153	5.88748	0.905318	0.1648	0	0	2.25514e-17	1.34489e-16	1.34489e-16	***	ALDEx2
199	BS - RO	k__Fungi|p__|c__|o__|f__|g__|s__|ASV_2389	4.64344	3.21677	1.32361	0.0826	0	0	0	0	0	***	ALDEx2
200	BS - RO	k__|p__|c__|o__|f__|g__|s__|ASV_0470	-3.92074	3.16945	-1.09298	0.0853829	3.6495e-32	2.01961e-31	5.8923e-30	4.15272e-29	4.15272e-29	***	ALDEx2
201	BS - RO	k__Fungi|p__|c__|o__|f__|g__|s__|ASV_0815	-3.89131	3.30007	-1.056	0.1008	9.26409e-34	5.7566e-33	4.70706e-28	2.95966e-27	2.95966e-27	***	ALDEx2
202	BS - RO	k__|p__|c__|o__|f__|g__|s__|ASV_2024	5.03951	3.97156	1.18346	0.0771846	0	0	0	0	0	***	ALDEx2
203	BS - RO	k__Fungi|p__|c__|o__|f__|g__|s__|ASV_2022	-0.681312	4.2537	-0.137985	0.4324	0.0293183	0.0643441	0.094762	0.203751	0.203751		ALDEx2
204	BS - RO	k__Fungi|p__Basidiomycota|c__Agaricomycetes|o__Polyporales|f__Fomitopsidaceae|g__|s__Fomitopsidaceae_sp|ASV_2552	3.04904	5.70661	0.470969	0.249	1.45371e-09	4.63951e-09	4.68472e-09	1.47779e-08	1.47779e-08	***	ALDEx2
205	BS - RO	k__Fungi|p__|c__|o__|f__|g__|s__|ASV_2532	-3.14055	3.12807	-0.885223	0.146	6.09205e-26	2.63599e-25	9.17202e-22	4.21892e-21	4.21892e-21	***	ALDEx2
206	BS - RO	k__|p__|c__|o__|f__|g__|s__|ASV_2680	-4.03009	2.66955	-1.40881	0.037	3.87933e-42	3.19128e-41	4.07307e-37	5.35472e-36	5.35472e-36	***	ALDEx2
207	BS - RO	k__|p__|c__|o__|f__|g__|s__|ASV_1096	3.07875	6.36565	0.45157	0.279	1.00698e-08	3.08403e-08	7.64319e-08	2.2975e-07	2.2975e-07	***	ALDEx2
208	BS - RO	k__|p__|c__|o__|f__|g__|s__|ASV_2510	4.7248	6.06882	0.735231	0.1908	2.51535e-16	1.2779e-15	1.98053e-14	9.12053e-14	9.12053e-14	***	ALDEx2
209	BS - RO	k__Fungi|p__Basidiomycota|c__Agaricomycetes|o__Sebacinales|f__|g__|s__Sebacinales_sp|ASV_3190	-6.02649	3.05993	-1.92053	0.0035994	2.5885e-57	4.77493e-56	2.04662e-42	1.5243e-40	1.5243e-40	***	ALDEx2
210	BS - RO	k__|p__|c__|o__|f__|g__|s__|ASV_0617	-3.23054	3.09237	-0.943842	0.1416	3.61768e-28	1.72025e-27	4.98299e-23	2.43297e-22	2.43297e-22	***	ALDEx2
211	BS - RO	k__Fungi|p__|c__|o__|f__|g__|s__|ASV_3163	2.16144	5.75668	0.33946	0.3522	3.28571e-05	8.75016e-05	9.38231e-05	0.000249629	0.000249629	***	ALDEx2
212	BS - RO	k__Fungi|p__Basidiomycota|c__Agaricomycetes|o__Agaricales|f__Psathyrellaceae|g__Coprinopsis|s__Coprinopsis_sp|ASV_2949	-6.03691	3.15216	-1.82604	0.017	8.5891e-58	1.5063e-56	3.93139e-40	7.85692e-39	7.85692e-39	***	ALDEx2
213	BS - RO	k__Fungi|p__Mortierellomycota|c__|o__|f__|g__|s__|ASV_0929	-3.93759	6.98469	-0.492559	0.339132	2.23505e-05	5.43031e-05	3.77807e-05	9.20822e-05	9.20822e-05	***	ALDEx2
214	BS - RO	k__Fungi|p__|c__|o__|f__|g__|s__|ASV_0619	-2.4951	2.82756	-0.782406	0.159568	3.90971e-24	1.61916e-23	2.12823e-20	8.94542e-20	8.94542e-20	***	ALDEx2
215	BS - RO	k__|p__|c__|o__|f__|g__|s__|ASV_2476	0.100167	4.75237	0.0204825	0.490302	0.870621	0.998778	0.812334	1	1		ALDEx2
216	BS - RO	k__|p__|c__|o__|f__|g__|s__|ASV_2332	-3.70235	2.5168	-1.38179	0.044	2.75532e-38	1.98925e-37	7.78405e-36	8.2097e-35	8.2097e-35	***	ALDEx2
217	BS - RO	k__Fungi|p__Mortierellomycota|c__Mortierellomycetes|o__Mortierellales|f__Mortierellaceae|g__Mortierella|s__Mortierella_elongata|ASV_1723	2.04097	6.65271	0.283757	0.383523	0.000368518	0.00094106	0.00261381	0.00633112	0.00633112	**	ALDEx2
218	BS - RO	k__Fungi|p__Chytridiomycota|c__Spizellomycetes|o__Spizellomycetales|f__Spizellomycetaceae|g__Spizellomyces|s__Spizellomyces_dolichospermus|ASV_2459	1.10037	3.38126	0.267802	0.372925	0.0191383	0.0456957	0.000498178	0.00126321	0.00126321	**	ALDEx2
219	BS - RO	k__|p__|c__|o__|f__|g__|s__|ASV_2802	2.99914	6.53622	0.42462	0.289542	6.49746e-09	2.0986e-08	3.32155e-07	9.6241e-07	9.6241e-07	***	ALDEx2
220	BS - RO	k__Fungi|p__Basidiomycota|c__Agaricomycetes|o__Polyporales|f__Fomitopsidaceae|g__|s__Fomitopsidaceae_sp|ASV_2491	1.73189	4.44509	0.346906	0.333333	9.68415e-05	0.000251907	1.89723e-06	5.53895e-06	5.53895e-06	***	ALDEx2
221	BS - RO	k__Fungi|p__Basidiomycota|c__Agaricomycetes|o__Polyporales|f__Podoscyphaceae|g__Abortiporus|s__Abortiporus_biennis|ASV_3140	-2.87783	3.03946	-0.866331	0.13	3.07213e-26	1.3115e-25	2.34636e-23	1.16954e-22	1.16954e-22	***	ALDEx2
222	BS - RO	k__Fungi|p__|c__|o__|f__|g__|s__|ASV_1488	4.42146	7.05009	0.60811	0.25135	5.88988e-12	2.16739e-11	8.44458e-11	2.99344e-10	2.99344e-10	***	ALDEx2
223	BS - RO	k__Fungi|p__|c__|o__|f__|g__|s__|ASV_2896	-1.98222	3.19595	-0.518906	0.254749	2.65976e-15	8.59115e-15	6.58019e-11	1.96144e-10	1.96144e-10	***	ALDEx2
224	BS - RO	k__Fungi|p__Mortierellomycota|c__Mortierellomycetes|o__Mortierellales|f__|g__|s__|ASV_2390	5.10607	6.09067	0.781284	0.182763	1.5786e-16	8.44088e-16	6.59195e-17	4.01437e-16	4.01437e-16	***	ALDEx2
225	BS - RO	k__|p__|c__|o__|f__|g__|s__|ASV_3125	0.428714	2.95768	0.121284	0.4384	0.455654	0.839222	0.136292	0.303855	0.303855		ALDEx2
226	BS - RO	k__Fungi|p__Basidiomycota|c__|o__|f__|g__|s__|ASV_0604	3.51523	5.36312	0.580277	0.266147	1.19723e-10	4.10229e-10	1.46576e-09	4.98065e-09	4.98065e-09	***	ALDEx2
227	BS - RO	k__|p__|c__|o__|f__|g__|s__|ASV_2266	0.607187	6.47572	0.0870288	0.454909	0.290841	0.550376	0.23462	0.453134	0.453134		ALDEx2
228	BS - RO	k__Fungi|p__Chytridiomycota|c__|o__|f__|g__|s__Chytridiomycota_sp|ASV_2311	-0.276284	4.85248	-0.0507735	0.478504	0.595724	0.881005	0.523667	0.884864	0.884864		ALDEx2
229	BS - RO	k__|p__|c__|o__|f__|g__|s__|ASV_1833	-3.38135	4.05778	-0.760484	0.186763	3.23733e-15	1.02016e-14	2.18181e-17	8.09227e-17	8.09227e-17	***	ALDEx2
230	BS - RO	k__Fungi|p__|c__|o__|f__|g__|s__|ASV_0701	-2.56001	4.01643	-0.547791	0.265147	2.55896e-11	7.19302e-11	6.52898e-11	1.9511e-10	1.9511e-10	***	ALDEx2
231	BS - RO	k__Fungi|p__Basidiomycota|c__Tremellomycetes|o__|f__|g__|s__Tremellomycetes_sp|ASV_2839	-1.23669	5.86032	-0.190879	0.417317	0.0651356	0.138698	0.0378186	0.0839911	0.0839911		ALDEx2
232	BS - RO	k__Fungi|p__|c__|o__|f__|g__|s__|ASV_1384	2.93733	5.79899	0.476604	0.2614	3.11068e-10	1.05231e-09	7.93446e-09	2.54973e-08	2.54973e-08	***	ALDEx2
233	BS - RO	k__|p__|c__|o__|f__|g__|s__|ASV_1998	5.87632	5.00259	1.09596	0.106979	0	0	0	0	0	***	ALDEx2
234	BS - RO	k__Fungi|p__|c__|o__|f__|g__|s__|ASV_1955	4.20783	6.24181	0.642324	0.2276	2.24317e-13	8.46586e-13	4.01263e-10	1.26961e-09	1.26961e-09	***	ALDEx2
235	BS - RO	k__Fungi|p__Basidiomycota|c__Agaricomycetes|o__Agaricales|f__Clavariaceae|g__Clavaria|s__Clavaria_sp|ASV_2953	3.14688	5.98347	0.471647	0.29854	7.56437e-08	2.29974e-07	1.24879e-07	3.84216e-07	3.84216e-07	***	ALDEx2
236	BS - RO	k__Fungi|p__Basidiomycota|c__Agaricomycetes|o__Agaricales|f__Pluteaceae|g__Volvopluteus|s__Volvopluteus_gloiocephalus|ASV_2632	-5.99184	3.1176	-1.85287	0.00760005	5.34905e-58	8.9401e-57	4.688e-42	2.51238e-40	2.51238e-40	***	ALDEx2
237	BS - RO	k__Fungi|p__|c__|o__|f__|g__|s__|ASV_1409	4.13067	3.56914	1.04313	0.123975	9.36751e-17	5.01615e-16	0	0	0	***	ALDEx2
238	BS - RO	k__Fungi|p__|c__|o__|f__|g__|s__|ASV_0953	-4.09332	6.89939	-0.526583	0.3372	3.95924e-05	9.47541e-05	2.81981e-05	6.8416e-05	6.8416e-05	***	ALDEx2
239	BS - RO	k__Fungi|p__Basidiomycota|c__Agaricomycetes|o__Agaricales|f__Clavariaceae|g__|s__|ASV_2248	-0.308728	2.85785	-0.0900707	0.4544	0.00584044	0.013346	0.189105	0.395098	0.395098		ALDEx2
240	BS - RO	k__Fungi|p__Chytridiomycota|c__Rhizophydiomycetes|o__Rhizophydiales|f__|g__|s__|ASV_2333	3.52298	5.96036	0.559886	0.2524	1.26554e-10	4.27857e-10	7.69857e-10	2.56904e-09	2.56904e-09	***	ALDEx2
241	BS - RO	k__Fungi|p__|c__|o__|f__|g__|s__|ASV_1072	3.39732	5.78415	0.538709	0.24975	4.26488e-10	1.40553e-09	6.271e-10	2.07998e-09	2.07998e-09	***	ALDEx2
242	BS - RO	k__|p__|c__|o__|f__|g__|s__|ASV_1909	-2.69079	4.7771	-0.499192	0.279544	8.52852e-06	2.03266e-05	3.31032e-09	9.10908e-09	9.10908e-09	***	ALDEx2
243	BS - RO	k__|p__|c__|o__|f__|g__|s__|ASV_2334	0.492959	4.94667	0.0851912	0.4596	0.23139	0.483177	0.392707	0.77443	0.77443		ALDEx2

## Sheet: Dataset S10
Dataset S10: Significantly differentially abundant OTUs across the rhizocompartments
OTUcounts ~ Compartment
ID	baseMean	logFC	lfcSE	stat	pvalue	Compartment	Enrich			ID	baseMean	log2FoldChange	lfcSE	stat	pvalue	Compartment	Enrich
OTU_0001	0.0289031	-0.151011	1.17417	-0.128611	0.897665	RO	NS			OTU_0000	0.0841236	-0.00380345	1.17638	-0.00323319	0.99742	RS	NS
OTU_0003	2.44555	-0.594455	0.565613	-1.05099	0.293262	RO	NS			OTU_0001	0.822168	0.196631	0.399334	0.492397	0.622439	RS	NS
OTU_0004	0.543967	-0.845127	1.14507	-0.738056	0.46048	RO	NS			OTU_0002	0.153325	-0.397796	1.10703	-0.359336	0.719344	RS	NS
OTU_0005	0.551541	-0.817755	0.810917	-1.00843	0.313247	RO	NS			OTU_0003	11.3985	-0.454569	0.215477	-2.10959	0.0348933	RS	NS
OTU_0012	0.0190987	-0.195162	1.17423	-0.166204	0.867997	RO	NS			OTU_0004	0.816244	-0.302295	0.460566	-0.656355	0.511596	RS	NS
OTU_0013	0.0117601	-0.362653	1.1739	-0.30893	0.757375	RO	NS			OTU_0005	2.07842	-0.151271	0.186151	-0.812628	0.416431	RS	NS
OTU_0014	0.011785	-0.266877	1.17411	-0.227301	0.82019	RO	NS			OTU_0006	0.213614	-0.00579811	0.691278	-0.00838753	0.993308	RS	NS
OTU_0015	0.047393	-0.229384	1.17394	-0.195398	0.845082	RO	NS			OTU_0007	1.40974	-0.0251332	0.316403	-0.0794342	0.936687	RS	NS
OTU_0017	0.011785	-0.266877	1.17411	-0.227301	0.82019	RO	NS			OTU_0008	0.0202065	-0.0486587	1.17644	-0.0413611	0.967008	RS	NS
OTU_0019	0.118748	-0.0703616	1.174	-0.0599332	0.952209	RO	NS			OTU_0009	0.164871	0.132928	0.762689	0.174289	0.861638	RS	NS
OTU_0021	0.0743141	-0.252692	1.17358	-0.215317	0.82952	RO	NS			OTU_0010	0.0327961	-0.18006	1.17614	-0.153094	0.878324	RS	NS
OTU_0022	0.0110402	-0.227453	1.17427	-0.193697	0.846413	RO	NS			OTU_0011	0.0171826	-0.0486587	1.17644	-0.0413611	0.967008	RS	NS
OTU_0024	0.154397	-0.190744	1.12897	-0.168954	0.865833	RO	NS			OTU_0012	0.168882	-0.171379	0.769293	-0.222774	0.823711	RS	NS
OTU_0025	0.0281997	-0.138233	1.17417	-0.117728	0.906283	RO	NS			OTU_0013	0.397002	-0.395986	0.430268	-0.920325	0.357403	RS	NS
OTU_0026	0.187496	0.0137358	0.595579	0.0230629	0.9816	RO	NS			OTU_0014	0.0438771	-0.112836	1.17643	-0.0959142	0.923589	RS	NS
OTU_0029	0.027353	-0.24656	1.17405	-0.210009	0.833661	RO	NS			OTU_0015	0.165497	0.0470663	0.861722	0.0546189	0.956442	RS	NS
OTU_0035	0.0754591	-0.195162	1.17423	-0.166204	0.867997	RO	NS			OTU_0016	0.0230011	-0.168816	1.17624	-0.143522	0.885878	RS	NS
OTU_0039	0.0112511	-0.266877	1.17411	-0.227301	0.82019	RO	NS			OTU_0018	0.0842964	0.00532575	1.17635	0.00452734	0.996388	RS	NS
OTU_0041	0.081746	-0.254723	1.1742	-0.216932	0.828261	RO	NS			OTU_0019	0.125026	0.121822	1.17617	0.103575	0.917507	RS	NS
OTU_0042	0.0836818	-0.14691	0.906148	-0.162126	0.871206	RO	NS			OTU_0020	0.440723	0.756426	0.939973	0.804731	0.420975	RS	NS
OTU_0044	0.00785547	-0.209831	1.17425	-0.178693	0.858179	RO	NS			OTU_0021	0.306624	-0.0108078	0.844945	-0.0127911	0.989794	RS	NS
OTU_0046	0.00830109	-0.211622	1.17426	-0.180218	0.856981	RO	NS			OTU_0022	0.162082	0.061752	1.06963	0.057732	0.953962	RS	NS
OTU_0047	0.133722	-0.171914	0.878301	-0.195735	0.844817	RO	NS			OTU_0023	0.0720294	0.0933823	1.17629	0.0793874	0.936725	RS	NS
OTU_0048	0.0392102	-0.227451	1.17413	-0.193719	0.846396	RO	NS			OTU_0024	1.06107	0.0519167	0.317198	0.163673	0.869989	RS	NS
OTU_0050	0.147632	-0.210045	0.964388	-0.217801	0.827584	RO	NS			OTU_0025	1.97315	-0.0993419	0.364208	-0.272762	0.785036	RS	NS
OTU_0051	0.16962	-0.298338	0.731311	-0.40795	0.68331	RO	NS			OTU_0026	0.0409869	-0.0129305	1.1764	-0.0109915	0.99123	RS	NS
OTU_0053	0.0927527	-0.236804	1.17382	-0.201737	0.840122	RO	NS			OTU_0027	0.0565969	0.0585353	1.17634	0.0497603	0.960313	RS	NS
OTU_0054	0.0359867	-0.203636	1.17399	-0.173456	0.862293	RO	NS			OTU_0028	0.0500657	-0.27495	1.17575	-0.23385	0.815101	RS	NS
OTU_0055	0.134458	-0.367796	0.729221	-0.504368	0.614003	RO	NS			OTU_0029	0.0623966	0.0261503	1.17635	0.02223	0.982265	RS	NS
OTU_0062	0.0173237	-0.280095	1.17401	-0.23858	0.811431	RO	NS			OTU_0030	0.319906	-0.180221	0.688311	-0.261831	0.793452	RS	NS
OTU_0063	2.09412	-1.85573	0.991988	-1.87072	0.0613843	RO	NS			OTU_0031	0.110376	0.0995407	0.988315	0.100718	0.919775	RS	NS
OTU_0065	0.209011	-0.343456	1.10308	-0.31136	0.755527	RO	NS			OTU_0032	0.0200695	0.0286262	1.17638	0.0243342	0.980586	RS	NS
OTU_0066	0.0641894	-0.157061	1.17404	-0.133778	0.893578	RO	NS			OTU_0033	0.205855	-0.537869	1.17421	-0.458068	0.646903	RS	NS
OTU_0069	0.159655	-0.281269	0.791945	-0.355162	0.722468	RO	NS			OTU_0034	0.138795	-0.08776	0.768206	-0.11424	0.909047	RS	NS
OTU_0071	1.18986	-0.0953528	0.271265	-0.351512	0.725205	RO	NS			OTU_0035	0.600781	0.000122641	0.346566	0.000353874	0.999718	RS	NS
OTU_0086	0.0873736	-0.144975	1.17416	-0.123472	0.901734	RO	NS			OTU_0036	0.122838	-0.60053	1.17411	-0.511477	0.609017	RS	NS
OTU_0087	0.0131754	-0.279048	1.17402	-0.237687	0.812124	RO	NS			OTU_0037	0.129774	-0.0123529	0.966115	-0.0127862	0.989798	RS	NS
OTU_0089	1.63647	-0.138285	0.334035	-0.413984	0.678886	RO	NS			OTU_0038	0.053949	-0.119935	1.17639	-0.101952	0.918795	RS	NS
OTU_0090	0.07363	-0.338698	1.17374	-0.288564	0.772915	RO	NS			OTU_0039	0.0143192	-0.168816	1.17624	-0.143522	0.885878	RS	NS
OTU_0091	0.0208409	-0.299042	1.17387	-0.254748	0.798918	RO	NS			OTU_0041	0.11625	0.0600197	0.98676	0.060825	0.951499	RS	NS
OTU_0093	0.0383012	-0.338968	1.17361	-0.288825	0.772715	RO	NS			OTU_0042	0.0183804	-0.0486587	1.17644	-0.0413611	0.967008	RS	NS
OTU_0095	0.0340163	-0.329837	1.17367	-0.281031	0.778686	RO	NS			OTU_0043	0.289047	0.047331	0.474544	0.0997399	0.920551	RS	NS
OTU_0096	0.0822117	-0.304778	1.17344	-0.25973	0.795072	RO	NS			OTU_0045	0.0231476	-0.0974313	1.17642	-0.0828202	0.933994	RS	NS
OTU_0098	0.0104204	-0.271624	1.17407	-0.231352	0.817041	RO	NS			OTU_0046	0.265828	-0.193708	0.537518	-0.360375	0.718567	RS	NS
OTU_0099	0.140103	-0.18196	0.787434	-0.23108	0.817253	RO	NS			OTU_0047	0.131888	0.05467	1.12883	0.0484305	0.961373	RS	NS
OTU_0103	0.306381	0.116049	0.647124	0.179331	0.857678	RO	NS			OTU_0048	0.0740983	-0.0741376	1.17625	-0.063029	0.949743	RS	NS
OTU_0104	0.292801	-0.241823	1.17326	-0.206112	0.836703	RO	NS			OTU_0049	0.0162066	-0.168816	1.17624	-0.143522	0.885878	RS	NS
OTU_0107	0.039311	-0.0624836	1.17456	-0.0531977	0.957574	RO	NS			OTU_0050	3.21272	0.316668	0.220003	1.43938	0.150042	RS	NS
OTU_0110	0.0824834	-0.167182	1.17431	-0.142367	0.88679	RO	NS			OTU_0051	6.95545	0.0824397	0.266388	0.309472	0.756962	RS	NS
OTU_0111	0.0193668	-0.280095	1.17401	-0.23858	0.811431	RO	NS			OTU_0052	0.0215152	-0.0486587	1.17644	-0.0413611	0.967008	RS	NS
OTU_0112	0.679582	-0.416946	0.571054	-0.730134	0.465308	RO	NS			OTU_0053	0.357638	-0.257046	0.379871	-0.676666	0.498618	RS	NS
OTU_0118	0.0131754	-0.279048	1.17402	-0.237687	0.812124	RO	NS			OTU_0054	0.169498	-0.335293	0.869539	-0.385599	0.699794	RS	NS
OTU_0122	0.00572071	-0.168806	1.17439	-0.143739	0.885707	RO	NS			OTU_0056	1.11357	-0.517951	0.364656	-1.42038	0.155496	RS	NS
OTU_0128	0.0483449	-0.154271	1.17388	-0.13142	0.895443	RO	NS			OTU_0057	0.0562339	-0.0737141	1.17636	-0.0626628	0.950035	RS	NS
OTU_0131	0.10621	-0.589846	1.01487	-0.581206	0.561101	RO	NS			OTU_0058	0.543692	0.348968	0.360401	0.968278	0.332905	RS	NS
OTU_0137	0.094474	-0.250149	1.16521	-0.214681	0.830016	RO	NS			OTU_0059	0.201051	0.0818752	0.680806	0.120262	0.904275	RS	NS
OTU_0138	0.0873736	-0.144975	1.17416	-0.123472	0.901734	RO	NS			OTU_0060	0.11569	0.0170613	0.87118	0.0195842	0.984375	RS	NS
OTU_0143	6.92304	0.103435	0.250459	0.412984	0.679619	RO	NS			OTU_0061	0.0451024	-0.0512087	1.17639	-0.0435303	0.965279	RS	NS
OTU_0144	0.153237	-0.0959378	0.907685	-0.105695	0.915824	RO	NS			OTU_0063	0.102509	-0.144717	1.17591	-0.123069	0.902053	RS	NS
OTU_0145	0.0614851	-0.254723	1.1742	-0.216932	0.828261	RO	NS			OTU_0064	0.0247386	-0.0903339	1.17646	-0.0767845	0.938795	RS	NS
OTU_0150	0.00830109	-0.211622	1.17426	-0.180218	0.856981	RO	NS			OTU_0065	3.53438	0.0696977	0.158793	0.438921	0.660719	RS	NS
OTU_0151	0.30523	0.143647	0.475825	0.30189	0.762736	RO	NS			OTU_0066	0.512111	-0.511745	0.385608	-1.32711	0.184471	RS	NS
OTU_0155	0.443375	0.112885	0.531931	0.212218	0.831937	RO	NS			OTU_0067	0.0150378	-0.00710444	1.17641	-0.00603908	0.995182	RS	NS
OTU_0158	0.369807	-0.319352	0.531635	-0.600698	0.548041	RO	NS			OTU_0068	0.0184208	-0.0974313	1.17642	-0.0828202	0.933994	RS	NS
OTU_0159	0.0940226	-0.175717	1.16351	-0.151023	0.879958	RO	NS			OTU_0069	2.24138	0.0718562	0.174708	0.411292	0.680858	RS	NS
OTU_0162	0.299843	-0.406334	1.17367	-0.346209	0.729186	RO	NS			OTU_0070	0.0302562	0.134307	1.1763	0.114178	0.909097	RS	NS
OTU_0165	0.229687	-0.094897	0.569566	-0.166613	0.867675	RO	NS			OTU_0071	1.22258	-0.0611921	0.212061	-0.288559	0.772919	RS	NS
OTU_0166	0.0502273	-0.0223426	1.17428	-0.0190265	0.98482	RO	NS			OTU_0072	0.221544	-0.128519	0.644412	-0.199435	0.841922	RS	NS
OTU_0167	0.0294379	-0.302396	1.17385	-0.257611	0.796707	RO	NS			OTU_0073	0.0153285	0.04824	1.17636	0.0410078	0.96729	RS	NS
OTU_0175	18.69	0.336209	0.212764	1.58019	0.114063	RO	NS			OTU_0074	0.0194752	-0.135657	1.17639	-0.115316	0.908195	RS	NS
OTU_0176	0.0354731	-0.280095	1.17401	-0.23858	0.811431	RO	NS			OTU_0075	0.403866	0.0786375	0.575844	0.136561	0.891378	RS	NS
OTU_0177	0.150721	-0.420396	0.914157	-0.459873	0.645607	RO	NS			OTU_0076	0.132621	-0.142452	1.1059	-0.128811	0.897507	RS	NS
OTU_0180	0.0313976	-0.200281	1.17409	-0.170584	0.864551	RO	NS			OTU_0077	0.0292033	-0.34384	1.1756	-0.292479	0.76992	RS	NS
OTU_0186	0.098575	-0.449536	1.15066	-0.390678	0.696035	RO	NS			OTU_0078	0.0200841	0.0783834	1.17634	0.0666334	0.946874	RS	NS
OTU_0191	0.149876	-0.455979	0.897202	-0.508223	0.611297	RO	NS			OTU_0079	0.0977082	-0.115254	1.17615	-0.0979922	0.921938	RS	NS
OTU_0192	0.667869	0.66329	0.876237	0.756976	0.449064	RO	NS			OTU_0080	0.0388614	-0.121304	1.17624	-0.103128	0.917861	RS	NS
OTU_0193	0.0107799	-0.211622	1.17426	-0.180218	0.856981	RO	NS			OTU_0082	0.702462	-0.088663	0.282252	-0.314127	0.753425	RS	NS
OTU_0197	0.0127671	-0.277966	1.17402	-0.236764	0.81284	RO	NS			OTU_0083	0.0961466	0.00861653	1.15422	0.00746526	0.994044	RS	NS
OTU_0198	1.39033	-0.276328	0.338097	-0.817304	0.413755	RO	NS			OTU_0084	0.0246823	-0.00710444	1.17641	-0.00603908	0.995182	RS	NS
OTU_0200	23.0679	-0.488784	0.209959	-2.328	0.0199121	RO	NS			OTU_0085	0.0790978	-0.124739	1.1761	-0.106062	0.915533	RS	NS
OTU_0201	0.00531275	-0.173263	1.17439	-0.147534	0.88271	RO	NS			OTU_0086	0.325796	-0.277487	0.466819	-0.59442	0.552231	RS	NS
OTU_0202	0.0127293	-0.211622	1.17426	-0.180218	0.856981	RO	NS			OTU_0088	0.0204375	-0.135657	1.17639	-0.115316	0.908195	RS	NS
OTU_0203	0.0157864	-0.352563	1.17386	-0.300346	0.763913	RO	NS			OTU_0089	35.243	-0.0155406	0.0673759	-0.230655	0.817583	RS	NS
OTU_0207	0.475421	-0.451732	0.631467	-0.715369	0.474381	RO	NS			OTU_0090	0.179456	-0.0568738	0.755372	-0.0752925	0.939982	RS	NS
OTU_0209	0.259089	0.21115	1.1736	0.179917	0.857218	RO	NS			OTU_0091	0.0420444	-0.121304	1.17624	-0.103128	0.917861	RS	NS
OTU_0210	0.163492	-0.144975	1.17416	-0.123472	0.901734	RO	NS			OTU_0092	0.0391942	0.00202201	1.17638	0.00171883	0.998629	RS	NS
OTU_0211	0.0232506	-0.211622	1.17426	-0.180218	0.856981	RO	NS			OTU_0094	0.207886	-0.111242	0.841093	-0.132258	0.89478	RS	NS
OTU_0212	0.00785547	-0.209831	1.17425	-0.178693	0.858179	RO	NS			OTU_0095	0.0862142	-0.181679	1.17574	-0.154523	0.877198	RS	NS
OTU_0213	0.804514	-0.925186	0.980244	-0.943833	0.345255	RO	NS			OTU_0096	0.816584	0.442716	0.534839	0.827756	0.407809	RS	NS
OTU_0216	0.00785547	-0.209831	1.17425	-0.178693	0.858179	RO	NS			OTU_0097	0.0250329	-0.168816	1.17624	-0.143522	0.885878	RS	NS
OTU_0218	0.0211864	-0.25502	1.17406	-0.217212	0.828043	RO	NS			OTU_0098	2.90805	0.151633	0.136525	1.11066	0.266715	RS	NS
OTU_0221	0.0291245	-0.211622	1.17426	-0.180218	0.856981	RO	NS			OTU_0100	0.0382491	-0.0603118	1.17642	-0.0512671	0.959113	RS	NS
OTU_0222	0.0748865	-0.228632	1.17378	-0.194782	0.845563	RO	NS			OTU_0101	0.0183804	-0.0486587	1.17644	-0.0413611	0.967008	RS	NS
OTU_0224	0.0197547	-0.0486886	1.17458	-0.0414521	0.966936	RO	NS			OTU_0102	3.55517	-0.118773	0.111397	-1.06621	0.286327	RS	NS
OTU_0229	0.0102003	-0.200253	1.17424	-0.170539	0.864587	RO	NS			OTU_0103	1.31275	-0.297758	0.271152	-1.09812	0.272152	RS	NS
OTU_0231	0.254981	-0.247157	0.64116	-0.385484	0.699879	RO	NS			OTU_0104	1.51892	-0.0120568	0.509126	-0.0236814	0.981107	RS	NS
OTU_0232	0.43378	0.0566178	0.53517	0.105794	0.915746	RO	NS			OTU_0105	0.0560968	-0.183942	1.17608	-0.156403	0.875716	RS	NS
OTU_0233	0.0101461	-0.270868	1.17408	-0.230707	0.817542	RO	NS			OTU_0106	0.0204375	-0.135657	1.17639	-0.115316	0.908195	RS	NS
OTU_0238	33.8418	0.980244	0.3896	2.51603	0.0118686	RO	NS			OTU_0107	0.0417334	-0.0187564	1.1764	-0.0159439	0.987279	RS	NS
OTU_0239	0.298509	-0.132437	0.931479	-0.142179	0.886938	RO	NS			OTU_0108	0.112044	0.0202813	1.17634	0.0172411	0.986244	RS	NS
OTU_0245	0.0157658	-0.200194	1.17435	-0.170472	0.864639	RO	NS			OTU_0109	0.078189	-0.220034	1.02967	-0.213694	0.830786	RS	NS
OTU_0246	0.0109819	-0.266877	1.17411	-0.227301	0.82019	RO	NS			OTU_0110	0.36669	-0.0571274	0.427384	-0.133668	0.893665	RS	NS
OTU_0253	0.00567205	-0.218584	1.17426	-0.186146	0.85233	RO	NS			OTU_0111	20.3234	0.249876	0.558665	0.447274	0.654677	RS	NS
OTU_0261	0.00572071	-0.168806	1.17439	-0.143739	0.885707	RO	NS			OTU_0112	0.480184	-0.416244	0.445556	-0.934214	0.350194	RS	NS
OTU_0264	1.388	-0.0215773	0.514486	-0.0419394	0.966547	RO	NS			OTU_0113	0.0532544	-0.0583045	1.17635	-0.0495638	0.96047	RS	NS
OTU_0265	0.701379	-0.415386	0.461872	-0.899354	0.368464	RO	NS			OTU_0114	0.0388621	0.0169757	1.17637	0.0144306	0.988486	RS	NS
OTU_0268	0.0126371	-0.155972	1.17441	-0.132809	0.894345	RO	NS			OTU_0115	0.0698128	-0.075262	1.17644	-0.0639742	0.948991	RS	NS
OTU_0270	0.0248163	-0.254723	1.1742	-0.216932	0.828261	RO	NS			OTU_0116	0.072967	0.0643599	1.17635	0.0547115	0.956368	RS	NS
OTU_0278	0.0160626	-0.211622	1.17426	-0.180218	0.856981	RO	NS			OTU_0117	0.0173223	-0.0486587	1.17644	-0.0413611	0.967008	RS	NS
OTU_0282	0.0126131	-0.211622	1.17426	-0.180218	0.856981	RO	NS			OTU_0118	0.254075	0.448834	0.700099	0.6411	0.521458	RS	NS
OTU_0284	23.0473	0.697703	0.343342	2.0321	0.0421438	RO	NS			OTU_0119	0.146002	0.0599735	0.958931	0.062542	0.950131	RS	NS
OTU_0285	0.222556	-0.164601	1.11723	-0.147329	0.882872	RO	NS			OTU_0120	0.119008	0.0560194	1.17631	0.047623	0.962017	RS	NS
OTU_0295	19.2898	-0.10094	0.247225	-0.408293	0.683058	RO	NS			OTU_0121	0.0489312	0.161212	1.17626	0.137054	0.890988	RS	NS
OTU_0302	0.0873736	-0.144975	1.17416	-0.123472	0.901734	RO	NS			OTU_0122	4.56372	0.209257	0.199543	1.04868	0.294325	RS	NS
OTU_0308	0.470264	-0.00581821	0.415118	-0.0140158	0.988817	RO	NS			OTU_0123	0.621512	-0.506144	0.334004	-1.51538	0.129675	RS	NS
OTU_0310	0.228723	0.414768	0.974314	0.425702	0.670325	RO	NS			OTU_0124	0.0961112	0.0387984	1.00983	0.0384208	0.969352	RS	NS
OTU_0311	0.00531275	-0.173263	1.17439	-0.147534	0.88271	RO	NS			OTU_0125	0.11917	0.0597923	0.869275	0.0687841	0.945161	RS	NS
OTU_0318	0.0430463	-0.346608	1.17356	-0.295347	0.767729	RO	NS			OTU_0126	0.0743103	0.0468863	1.17633	0.0398581	0.968206	RS	NS
OTU_0320	0.0465012	-0.178546	1.17421	-0.152057	0.879142	RO	NS			OTU_0127	0.3721	-0.502385	0.492904	-1.01924	0.308091	RS	NS
OTU_0326	1.85272	-0.535956	0.638324	-0.839631	0.401115	RO	NS			OTU_0128	1.63238	-0.143903	0.219336	-0.656085	0.511769	RS	NS
OTU_0328	0.0761837	-0.306568	1.17382	-0.261172	0.79396	RO	NS			OTU_0129	0.907067	0.236659	0.328634	0.720129	0.471446	RS	NS
OTU_0332	10.4496	0.195561	0.217683	0.898375	0.368986	RO	NS			OTU_0130	0.284957	0.419586	0.522896	0.802426	0.422306	RS	NS
OTU_0333	3.31146	0.305433	0.338334	0.902757	0.366655	RO	NS			OTU_0131	0.346597	-0.660051	0.664044	-0.993988	0.320229	RS	NS
OTU_0334	0.192824	-0.195032	1.1338	-0.172016	0.863425	RO	NS			OTU_0132	0.0200841	0.0783834	1.17634	0.0666334	0.946874	RS	NS
OTU_0335	0.137533	-0.732544	1.17268	-0.624675	0.532184	RO	NS			OTU_0133	0.0517715	-0.0666175	1.1764	-0.0566282	0.954841	RS	NS
OTU_0339	0.0495552	-0.0696289	1.174	-0.0593091	0.952706	RO	NS			OTU_0134	0.0196536	0.0286262	1.17638	0.0243342	0.980586	RS	NS
OTU_0342	0.0109819	-0.266877	1.17411	-0.227301	0.82019	RO	NS			OTU_0135	1.13529	-0.238655	0.277933	-0.858679	0.390518	RS	NS
OTU_0343	0.0440622	-0.15347	1.17386	-0.13074	0.895981	RO	NS			OTU_0136	0.609426	-0.0795547	0.365039	-0.217934	0.82748	RS	NS
OTU_0344	0.120667	0.0748209	0.916875	0.0816042	0.934961	RO	NS			OTU_0137	0.324447	-0.72799	0.957962	-0.759937	0.447292	RS	NS
OTU_0345	0.0392774	-0.0991026	1.17406	-0.08441	0.93273	RO	NS			OTU_0138	0.0415591	-0.0129305	1.1764	-0.0109915	0.99123	RS	NS
OTU_0349	0.0198261	-0.365122	1.17381	-0.311057	0.755757	RO	NS			OTU_0139	0.0153285	0.04824	1.17636	0.0410078	0.96729	RS	NS
OTU_0356	0.0193668	-0.280095	1.17401	-0.23858	0.811431	RO	NS			OTU_0140	0.659134	0.106337	0.333454	0.318895	0.749806	RS	NS
OTU_0358	11.51	0.187653	0.217908	0.861156	0.389152	RO	NS			OTU_0141	1.91971	0.0766377	0.218909	0.35009	0.726271	RS	NS
OTU_0359	1.94506	-0.264283	0.487894	-0.54168	0.588039	RO	NS			OTU_0142	0.0194752	-0.135657	1.17639	-0.115316	0.908195	RS	NS
OTU_0360	0.0160626	-0.211622	1.17426	-0.180218	0.856981	RO	NS			OTU_0143	0.868085	0.0688603	0.370029	0.186094	0.852371	RS	NS
OTU_0361	0.156574	-0.267269	0.975712	-0.273922	0.784145	RO	NS			OTU_0144	0.704098	0.232827	0.526429	0.442276	0.65829	RS	NS
OTU_0363	0.0288828	-0.224533	1.17397	-0.191259	0.848323	RO	NS			OTU_0145	0.516175	-0.528936	0.575425	-0.919209	0.357986	RS	NS
OTU_0365	4.23346	0.535732	0.540733	0.990751	0.321807	RO	NS			OTU_0146	0.268554	-0.00176817	0.539323	-0.0032785	0.997384	RS	NS
OTU_0366	2.67085	-0.453777	0.235103	-1.93012	0.0535921	RO	NS			OTU_0147	0.0917801	-0.232915	1.1555	-0.20157	0.840253	RS	NS
OTU_0367	0.107103	-0.282408	1.17413	-0.240525	0.809924	RO	NS			OTU_0148	0.0553379	0.0111506	1.17636	0.00947894	0.992437	RS	NS
OTU_0369	0.00859071	-0.211622	1.17426	-0.180218	0.856981	RO	NS			OTU_0149	0.0153285	0.04824	1.17636	0.0410078	0.96729	RS	NS
OTU_0374	0.0133493	-0.282408	1.17413	-0.240525	0.809924	RO	NS			OTU_0150	0.421255	-0.2812	0.359206	-0.782836	0.433723	RS	NS
OTU_0375	0.0166709	-0.266876	1.17411	-0.227301	0.82019	RO	NS			OTU_0152	0.0169789	0.0590527	1.17635	0.0501998	0.959963	RS	NS
OTU_0378	0.091164	-0.374683	1.17337	-0.319322	0.749482	RO	NS			OTU_0153	0.0154908	-0.0974313	1.17642	-0.0828202	0.933994	RS	NS
OTU_0380	0.21933	0.309755	0.891251	0.347551	0.728177	RO	NS			OTU_0154	0.0170618	-0.0974313	1.17642	-0.0828202	0.933994	RS	NS
OTU_0381	0.158072	-0.523623	1.17324	-0.446304	0.655378	RO	NS			OTU_0155	2.88824	0.0778385	0.20877	0.372844	0.709264	RS	NS
OTU_0382	0.305403	-0.742431	0.742259	-1.00023	0.317198	RO	NS			OTU_0156	0.804566	0.0223692	0.379547	0.0589367	0.953003	RS	NS
OTU_0384	0.0375927	-0.200194	1.17435	-0.170472	0.864639	RO	NS			OTU_0157	0.0153285	0.04824	1.17636	0.0410078	0.96729	RS	NS
OTU_0386	0.0173237	-0.280095	1.17401	-0.23858	0.811431	RO	NS			OTU_0158	2.40997	0.113385	0.147805	0.767128	0.443005	RS	NS
OTU_0388	0.359163	-0.200532	1.17225	-0.171066	0.864172	RO	NS			OTU_0159	0.750346	0.00897411	0.466557	0.0192348	0.984654	RS	NS
OTU_0389	2.53283	-0.297058	0.521452	-0.569674	0.568899	RO	NS			OTU_0161	0.125016	-0.0430648	0.965527	-0.0446024	0.964424	RS	NS
OTU_0390	0.912876	-0.106231	0.352616	-0.301265	0.763213	RO	NS			OTU_0162	0.0568412	-0.187815	1.17608	-0.159696	0.873121	RS	NS
OTU_0391	0.0232506	-0.211622	1.17426	-0.180218	0.856981	RO	NS			OTU_0163	0.0375782	-0.0666175	1.1764	-0.0566282	0.954841	RS	NS
OTU_0394	0.016713	-0.280095	1.17401	-0.23858	0.811431	RO	NS			OTU_0165	5.59241	-0.165364	0.103412	-1.59909	0.109801	RS	NS
OTU_0397	0.0131713	-0.195162	1.17423	-0.166204	0.867997	RO	NS			OTU_0166	1.59858	-0.507633	0.389771	-1.30239	0.192784	RS	NS
OTU_0398	1.94296	-0.50845	0.293794	-1.73063	0.0835171	RO	NS			OTU_0167	0.857412	-0.22587	0.205293	-1.10023	0.27123	RS	NS
OTU_0399	0.0299368	-0.249008	1.17395	-0.212111	0.83202	RO	NS			OTU_0168	0.591535	-0.0896245	0.320158	-0.279939	0.779524	RS	NS
OTU_0401	0.152766	-0.573214	0.906983	-0.632001	0.527386	RO	NS			OTU_0169	0.0525866	0.174035	1.17622	0.147962	0.882373	RS	NS
OTU_0404	0.0127293	-0.211622	1.17426	-0.180218	0.856981	RO	NS			OTU_0170	0.290862	-0.258585	0.480401	-0.53827	0.590391	RS	NS
OTU_0411	84.9826	1.10863	0.670258	1.65404	0.0981198	RO	NS			OTU_0171	0.182022	0.153577	1.08114	0.14205	0.88704	RS	NS
OTU_0412	0.0135719	-0.145232	1.17434	-0.123671	0.901576	RO	NS			OTU_0172	0.0169789	0.0590527	1.17635	0.0501998	0.959963	RS	NS
OTU_0413	0.0207106	-0.25533	1.17397	-0.217493	0.827824	RO	NS			OTU_0173	0.0231476	-0.0974313	1.17642	-0.0828202	0.933994	RS	NS
OTU_0419	20.3818	0.583572	0.243413	2.39746	0.0165092	RO	NS			OTU_0175	1.86757	-0.10354	0.18425	-0.561954	0.574147	RS	NS
OTU_0421	0.633641	-0.133174	0.473535	-0.281233	0.778531	RO	NS			OTU_0176	0.451954	-0.636391	0.533105	-1.19374	0.232579	RS	NS
OTU_0422	0.268105	0.146396	1.00847	0.145166	0.88458	RO	NS			OTU_0177	0.177036	0.00458031	0.979124	0.00467797	0.996268	RS	NS
OTU_0423	0.31119	-0.439469	0.877192	-0.500995	0.616374	RO	NS			OTU_0178	0.049824	-0.24078	1.17579	-0.204782	0.837743	RS	NS
OTU_0424	0.0112511	-0.266877	1.17411	-0.227301	0.82019	RO	NS			OTU_0179	0.0666733	-0.148964	1.17596	-0.126674	0.899198	RS	NS
OTU_0426	0.010994	-0.211622	1.17426	-0.180218	0.856981	RO	NS			OTU_0180	1.95908	-0.010322	0.297303	-0.0347187	0.972304	RS	NS
OTU_0430	6.91419	0.0946671	0.290247	0.32616	0.744303	RO	NS			OTU_0181	0.0482185	-0.224281	1.17593	-0.190726	0.84874	RS	NS
OTU_0431	1.97093	0.834598	0.962078	0.867496	0.38567	RO	NS			OTU_0182	0.154311	0.216851	0.641921	0.337816	0.735502	RS	NS
OTU_0432	0.0465012	-0.178546	1.17421	-0.152057	0.879142	RO	NS			OTU_0183	0.0154908	-0.0974313	1.17642	-0.0828202	0.933994	RS	NS
OTU_0433	0.598171	0.0489675	0.812475	0.0602695	0.951941	RO	NS			OTU_0184	0.0160024	0.0286262	1.17638	0.0243342	0.980586	RS	NS
OTU_0436	0.0179001	-0.266876	1.17411	-0.227301	0.82019	RO	NS			OTU_0185	0.0172065	-0.135657	1.17639	-0.115316	0.908195	RS	NS
OTU_0437	0.00567205	-0.218584	1.17426	-0.186146	0.85233	RO	NS			OTU_0186	0.252016	-0.383166	1.03713	-0.369449	0.711793	RS	NS
OTU_0439	0.0126131	-0.211622	1.17426	-0.180218	0.856981	RO	NS			OTU_0187	0.38845	0.0407859	0.492189	0.0828664	0.933958	RS	NS
OTU_0440	0.204844	-0.645836	1.17281	-0.550673	0.581858	RO	NS			OTU_0188	0.0561413	-0.0362331	1.17638	-0.0308006	0.975429	RS	NS
OTU_0441	0.00531275	-0.173263	1.17439	-0.147534	0.88271	RO	NS			OTU_0189	0.0172065	-0.135657	1.17639	-0.115316	0.908195	RS	NS
OTU_0442	0.181217	-0.348571	1.17367	-0.296992	0.766472	RO	NS			OTU_0190	0.0231476	-0.0974313	1.17642	-0.0828202	0.933994	RS	NS
OTU_0443	0.028102	-0.0779013	1.17443	-0.0663309	0.947114	RO	NS			OTU_0191	8.36704	-0.422474	0.361765	-1.16781	0.242882	RS	NS
OTU_0444	0.269927	-0.418231	1.06999	-0.390874	0.69589	RO	NS			OTU_0192	1.58684	0.919202	0.432151	2.12704	0.0334169	RS	NS
OTU_0445	0.0229777	-0.182596	1.17421	-0.155504	0.876424	RO	NS			OTU_0193	0.301063	0.324944	0.538995	0.602869	0.546596	RS	NS
OTU_0447	0.0614851	-0.254723	1.1742	-0.216932	0.828261	RO	NS			OTU_0194	0.0302562	0.134307	1.1763	0.114178	0.909097	RS	NS
OTU_0450	0.124762	-0.272042	1.12636	-0.241523	0.80915	RO	NS			OTU_0195	0.0495034	0.0111506	1.17636	0.00947894	0.992437	RS	NS
OTU_0451	8.88513	-1.04546	0.358043	-2.91993	0.00350112	RO	NS			OTU_0196	0.0339116	-0.121304	1.17624	-0.103128	0.917861	RS	NS
OTU_0452	0.0895475	-0.33751	1.15213	-0.292945	0.769564	RO	NS			OTU_0197	0.510227	-0.110103	0.343765	-0.320285	0.748752	RS	NS
OTU_0453	0.201077	-0.0180818	1.17335	-0.0154104	0.987705	RO	NS			OTU_0198	3.78788	0.0903647	0.150652	0.599825	0.548623	RS	NS
OTU_0460	1.51748	-0.124796	0.279047	-0.447223	0.654714	RO	NS			OTU_0199	0.269927	-0.404488	0.935615	-0.432323	0.665507	RS	NS
OTU_0461	11.5542	-0.113501	0.218923	-0.518453	0.604142	RO	NS			OTU_0200	2.44968	-0.713521	0.609448	-1.17077	0.241693	RS	NS
OTU_0462	0.17582	-0.311176	1.08933	-0.285658	0.77514	RO	NS			OTU_0201	0.0383841	-0.10453	1.17638	-0.088857	0.929196	RS	NS
OTU_0463	0.286506	0.0465481	0.997392	0.0466698	0.962776	RO	NS			OTU_0202	0.0143192	-0.168816	1.17624	-0.143522	0.885878	RS	NS
OTU_0464	2.85424	0.265222	0.260327	1.0188	0.308296	RO	NS			OTU_0204	0.0143192	-0.168816	1.17624	-0.143522	0.885878	RS	NS
OTU_0468	0.0587646	-0.323761	1.17397	-0.275784	0.782714	RO	NS			OTU_0206	0.0162256	-0.0486587	1.17644	-0.0413611	0.967008	RS	NS
OTU_0469	9.78692	0.193577	0.221191	0.875157	0.381488	RO	NS			OTU_0207	1.25425	0.0604738	0.289652	0.208781	0.834619	RS	NS
OTU_0470	0.136949	-0.409646	1.17263	-0.349338	0.726836	RO	NS			OTU_0208	1.95686	0.0417202	0.3602	0.115825	0.907791	RS	NS
OTU_0472	0.0309571	-0.155972	1.17441	-0.132809	0.894345	RO	NS			OTU_0209	0.0551526	-0.0903339	1.17646	-0.0767845	0.938795	RS	NS
OTU_0474	0.011785	-0.266877	1.17411	-0.227301	0.82019	RO	NS			OTU_0210	0.0317342	-0.0486587	1.17644	-0.0413611	0.967008	RS	NS
OTU_0476	0.018465	-0.226763	1.17413	-0.193132	0.846855	RO	NS			OTU_0212	9.91505	1.54689	0.406015	3.80993	0.000139004	RS	NS
OTU_0481	0.336406	-0.101101	0.732189	-0.13808	0.890177	RO	NS			OTU_0213	0.825505	0.344574	0.712952	0.483306	0.628878	RS	NS
OTU_0482	0.564798	0.312139	0.527578	0.591646	0.554088	RO	NS			OTU_0214	0.097278	-0.0741488	1.15055	-0.0644464	0.948615	RS	NS
OTU_0490	7.3939	0.673526	0.286981	2.34694	0.0189285	RO	NS			OTU_0215	0.0457195	-0.10453	1.17638	-0.088857	0.929196	RS	NS
OTU_0492	0.69835	-0.0726542	0.845328	-0.0859479	0.931508	RO	NS			OTU_0217	0.019344	-0.0486587	1.17644	-0.0413611	0.967008	RS	NS
OTU_0494	2.97445	-0.213626	0.285498	-0.748258	0.454305	RO	NS			OTU_0218	0.048196	-0.0891225	1.17637	-0.0757606	0.93961	RS	NS
OTU_0495	0.0490858	-0.323761	1.17397	-0.275784	0.782714	RO	NS			OTU_0219	0.019344	-0.0486587	1.17644	-0.0413611	0.967008	RS	NS
OTU_0496	0.020982	-0.0397149	1.17459	-0.0338118	0.973027	RO	NS			OTU_0220	0.0160024	0.0286262	1.17638	0.0243342	0.980586	RS	NS
OTU_0497	2.25436	0.0845706	0.368065	0.229771	0.81827	RO	NS			OTU_0221	0.813524	0.348183	0.356561	0.976504	0.328815	RS	NS
OTU_0498	0.0181432	-0.266876	1.17411	-0.227301	0.82019	RO	NS			OTU_0222	0.257116	0.206469	0.970509	0.212743	0.831528	RS	NS
OTU_0501	0.0909513	-0.111354	1.17448	-0.0948117	0.924464	RO	NS			OTU_0223	0.283413	0.248532	0.707077	0.351491	0.72522	RS	NS
OTU_0504	11.4936	-0.712178	0.353764	-2.01314	0.0440999	RO	NS			OTU_0224	0.152542	-0.113858	0.779562	-0.146053	0.883879	RS	NS
OTU_0505	0.166108	-0.0120325	0.703151	-0.0171123	0.986347	RO	NS			OTU_0225	0.0519627	-0.0428938	1.17635	-0.0364636	0.970913	RS	NS
OTU_0507	0.0126371	-0.155972	1.17441	-0.132809	0.894345	RO	NS			OTU_0226	0.0169789	0.0590527	1.17635	0.0501998	0.959963	RS	NS
OTU_0508	0.0426717	-0.280095	1.17401	-0.23858	0.811431	RO	NS			OTU_0227	0.052193	0.00784762	1.17639	0.00667093	0.994677	RS	NS
OTU_0511	0.421396	-0.45973	0.763123	-0.602433	0.546886	RO	NS			OTU_0228	0.0327533	-0.0544853	1.17643	-0.0463141	0.96306	RS	NS
OTU_0514	0.0467068	-0.321422	1.17372	-0.273849	0.784201	RO	NS			OTU_0230	0.0204406	-0.0974313	1.17642	-0.0828202	0.933994	RS	NS
OTU_0518	20.8528	-0.291424	0.214091	-1.36121	0.173447	RO	NS			OTU_0231	5.15545	-0.0611579	0.258319	-0.236753	0.812848	RS	NS
OTU_0519	0.125748	-0.108078	0.90874	-0.118931	0.90533	RO	NS			OTU_0232	1.34967	-0.17812	0.421984	-0.422101	0.672951	RS	NS
OTU_0520	0.760283	-0.396034	0.404475	-0.979131	0.327515	RO	NS			OTU_0233	2.38386	-0.0593927	0.274274	-0.216545	0.828563	RS	NS
OTU_0522	0.145991	-0.0297447	1.17356	-0.0253456	0.979779	RO	NS			OTU_0234	0.12562	0.263375	1.1189	0.235388	0.813907	RS	NS
OTU_0523	0.125443	-0.514075	1.1727	-0.438371	0.661118	RO	NS			OTU_0235	0.0385618	-0.119935	1.17639	-0.101952	0.918795	RS	NS
OTU_0529	0.0662599	-0.21835	1.17379	-0.186021	0.852428	RO	NS			OTU_0236	0.0328466	-0.0337081	1.17642	-0.0286532	0.977141	RS	NS
OTU_0530	0.91628	-0.952192	0.712086	-1.33719	0.181162	RO	NS			OTU_0237	0.0220874	-0.0486587	1.17644	-0.0413611	0.967008	RS	NS
OTU_0536	0.127598	-0.280413	0.723842	-0.387395	0.698464	RO	NS			OTU_0238	1.35841	0.347383	0.319005	1.08896	0.276172	RS	NS
OTU_0537	0.345662	-0.240939	0.618369	-0.389636	0.696806	RO	NS			OTU_0239	3.90578	0.236512	0.250797	0.943041	0.34566	RS	NS
OTU_0538	4.03888	-0.0846236	0.336962	-0.251137	0.801708	RO	NS			OTU_0240	0.148315	-0.243645	0.863377	-0.2822	0.77779	RS	NS
OTU_0539	0.113627	0.0458755	1.17458	0.0390571	0.968845	RO	NS			OTU_0241	0.0335892	0.0703092	1.17633	0.0597697	0.952339	RS	NS
OTU_0540	3.04133	-0.460215	0.521727	-0.8821	0.377723	RO	NS			OTU_0242	0.0493861	-0.128336	1.17632	-0.1091	0.913123	RS	NS
OTU_0541	0.0478871	-0.284357	1.17383	-0.242247	0.808589	RO	NS			OTU_0243	0.0204406	-0.0974313	1.17642	-0.0828202	0.933994	RS	NS
OTU_0543	0.0126131	-0.211622	1.17426	-0.180218	0.856981	RO	NS			OTU_0244	0.021808	-0.0337081	1.17642	-0.0286532	0.977141	RS	NS
OTU_0544	0.416159	-0.197739	0.594022	-0.332882	0.739223	RO	NS			OTU_0245	0.806471	-0.19997	0.333666	-0.599314	0.548964	RS	NS
OTU_0547	1.68963	-0.200233	0.47282	-0.423486	0.671941	RO	NS			OTU_0247	0.517636	-0.213219	0.491547	-0.433771	0.664455	RS	NS
OTU_0548	2.37649	-0.237424	0.402688	-0.589597	0.555461	RO	NS			OTU_0248	0.0792936	-0.357912	1.17529	-0.304531	0.760724	RS	NS
OTU_0549	0.18642	-0.123795	1.01669	-0.121763	0.903086	RO	NS			OTU_0249	0.0480071	0.218682	1.17616	0.185928	0.852501	RS	NS
OTU_0550	0.0714073	-0.303426	1.17384	-0.25849	0.796029	RO	NS			OTU_0250	0.0209811	-0.00710444	1.17641	-0.00603908	0.995182	RS	NS
OTU_0551	3.99654	-0.548164	0.269777	-2.03191	0.0421623	RO	NS			OTU_0251	0.177475	0.385313	1.10449	0.348861	0.727194	RS	NS
OTU_0557	30.5303	0.769698	0.819957	0.938705	0.347882	RO	NS			OTU_0252	0.154454	-0.335758	0.970602	-0.345928	0.729397	RS	NS
OTU_0558	0.0166377	-0.155972	1.17441	-0.132809	0.894345	RO	NS			OTU_0253	0.219518	0.0105188	0.753729	0.0139556	0.988865	RS	NS
OTU_0559	0.0318285	-0.167182	1.17431	-0.142367	0.88679	RO	NS			OTU_0255	0.0382593	-0.0544853	1.17643	-0.0463141	0.96306	RS	NS
OTU_0560	0.0968221	-0.162025	1.17418	-0.137989	0.890249	RO	NS			OTU_0256	0.0464831	-0.075262	1.17644	-0.0639742	0.948991	RS	NS
OTU_0562	0.0830575	-0.439688	1.17358	-0.374656	0.707916	RO	NS			OTU_0257	1.17146	-0.39357	0.350658	-1.12238	0.261703	RS	NS
OTU_0563	0.00785547	-0.209831	1.17425	-0.178693	0.858179	RO	NS			OTU_0258	0.238319	0.27982	0.584208	0.478973	0.631958	RS	NS
OTU_0566	0.0307376	-0.431847	1.17358	-0.367973	0.712893	RO	NS			OTU_0259	0.213317	-0.331706	0.641128	-0.517378	0.604892	RS	NS
OTU_0567	23.3544	-0.00185455	0.257455	-0.00720342	0.994253	RO	NS			OTU_0260	0.0200695	0.0286262	1.17638	0.0243342	0.980586	RS	NS
OTU_0568	0.00785547	-0.209831	1.17425	-0.178693	0.858179	RO	NS			OTU_0262	0.0183804	-0.0486587	1.17644	-0.0413611	0.967008	RS	NS
OTU_0571	1.26844	-0.242965	0.424215	-0.572741	0.56682	RO	NS			OTU_0263	1.6384	0.0544633	0.341554	0.159457	0.873309	RS	NS
OTU_0572	0.214415	-0.335322	1.17303	-0.285859	0.774986	RO	NS			OTU_0264	0.16085	0.0563803	0.778731	0.0724003	0.942283	RS	NS
OTU_0574	0.416901	-0.310378	0.647771	-0.479147	0.631834	RO	NS			OTU_0265	0.485232	-0.00196365	0.419287	-0.0046833	0.996263	RS	NS
OTU_0576	0.081746	-0.254723	1.1742	-0.216932	0.828261	RO	NS			OTU_0266	0.191632	0.0662783	1.07508	0.0616499	0.950842	RS	NS
OTU_0577	0.245113	-0.272519	0.719472	-0.378776	0.704854	RO	NS			OTU_0267	0.0353502	0.0697661	1.17634	0.0593078	0.952707	RS	NS
OTU_0580	0.00785547	-0.209831	1.17425	-0.178693	0.858179	RO	NS			OTU_0268	0.0162256	-0.0486587	1.17644	-0.0413611	0.967008	RS	NS
OTU_0583	0.223745	-0.228632	1.17378	-0.194782	0.845563	RO	NS			OTU_0269	0.140452	-0.219884	1.17539	-0.187073	0.851603	RS	NS
OTU_0585	0.0109819	-0.266877	1.17411	-0.227301	0.82019	RO	NS			OTU_0270	0.287927	0.254088	0.475332	0.534549	0.592962	RS	NS
OTU_0586	0.571981	-0.38913	0.73375	-0.53033	0.595883	RO	NS			OTU_0271	0.131525	-0.140588	0.849322	-0.16553	0.868527	RS	NS
OTU_0587	0.381006	-0.377137	1.17362	-0.321346	0.747948	RO	NS			OTU_0272	0.0624453	-0.137084	1.17624	-0.116544	0.907222	RS	NS
OTU_0589	0.38678	-0.173278	0.539677	-0.321077	0.748152	RO	NS			OTU_0273	0.0170618	-0.0974313	1.17642	-0.0828202	0.933994	RS	NS
OTU_0590	0.0105906	-0.211622	1.17426	-0.180218	0.856981	RO	NS			OTU_0274	0.0154908	-0.0974313	1.17642	-0.0828202	0.933994	RS	NS
OTU_0591	6.36892	-1.26868	0.382977	-3.31268	0.000924066	RO	Depleted			OTU_0275	0.0190128	-0.0337081	1.17642	-0.0286532	0.977141	RS	NS
OTU_0592	0.252149	-0.52828	0.85481	-0.618008	0.53657	RO	NS			OTU_0276	0.0317342	-0.0486587	1.17644	-0.0413611	0.967008	RS	NS
OTU_0595	0.132095	-0.449442	1.11485	-0.403141	0.686845	RO	NS			OTU_0277	0.0162256	-0.0486587	1.17644	-0.0413611	0.967008	RS	NS
OTU_0598	0.0117854	-0.266877	1.17411	-0.227301	0.82019	RO	NS			OTU_0278	0.644377	-0.0441159	0.516614	-0.0853943	0.931948	RS	NS
OTU_0600	2.88339	0.352621	0.306839	1.1492	0.250472	RO	NS			OTU_0279	0.142639	0.0806476	0.779768	0.103425	0.917626	RS	NS
OTU_0601	9.37886	-0.392939	0.241961	-1.62398	0.10438	RO	NS			OTU_0280	0.0866212	-0.0304077	1.17638	-0.0258485	0.979378	RS	NS
OTU_0602	2.73748	0.0696831	0.267725	0.260279	0.794649	RO	NS			OTU_0281	0.10024	0.0550497	1.15716	0.047573	0.962057	RS	NS
OTU_0603	0.084368	-0.0205995	1.17451	-0.0175388	0.986007	RO	NS			OTU_0282	7.20225	-0.0286634	0.118957	-0.240955	0.80959	RS	NS
OTU_0604	0.148388	-0.52133	1.13382	-0.4598	0.64566	RO	NS			OTU_0283	2.72934	0.0930974	0.415158	0.224246	0.822566	RS	NS
OTU_0605	0.0278476	-0.23606	1.17406	-0.201064	0.840649	RO	NS			OTU_0284	29.8069	0.379397	0.340742	1.11344	0.265518	RS	NS
OTU_0607	0.0396523	-0.471784	1.17346	-0.402047	0.68765	RO	NS			OTU_0285	6.17401	-0.247024	0.493292	-0.500766	0.616536	RS	NS
OTU_0608	7.15929	-0.0584322	0.31989	-0.182663	0.855062	RO	NS			OTU_0286	0.268086	-0.0575004	0.512913	-0.112106	0.91074	RS	NS
OTU_0609	1.52725	0.00815009	0.409631	0.0198962	0.984126	RO	NS			OTU_0287	0.249578	-0.133297	0.495382	-0.26908	0.787868	RS	NS
OTU_0610	3.19217	0.0861214	0.518842	0.165988	0.868167	RO	NS			OTU_0288	0.0247386	-0.0903339	1.17646	-0.0767845	0.938795	RS	NS
OTU_0616	0.0774583	-0.0874131	1.17432	-0.0744373	0.940662	RO	NS			OTU_0289	0.0172065	-0.135657	1.17639	-0.115316	0.908195	RS	NS
OTU_0617	0.010994	-0.211622	1.17426	-0.180218	0.856981	RO	NS			OTU_0290	0.319342	-0.470129	0.537757	-0.87424	0.381987	RS	NS
OTU_0618	36.4598	-0.699785	0.588572	-1.18895	0.234458	RO	NS			OTU_0291	0.069665	0.10339	1.17624	0.0878983	0.929958	RS	NS
OTU_0619	0.193173	-0.0135933	1.12198	-0.0121154	0.990334	RO	NS			OTU_0292	0.034263	0.0111506	1.17636	0.00947894	0.992437	RS	NS
OTU_0620	0.176417	-0.347147	1.17356	-0.295808	0.767377	RO	NS			OTU_0293	0.0144642	-0.168816	1.17624	-0.143522	0.885878	RS	NS
OTU_0621	0.0626589	-0.0589258	1.17413	-0.0501867	0.959974	RO	NS			OTU_0294	0.0314405	-0.10453	1.17638	-0.088857	0.929196	RS	NS
OTU_0623	0.0118957	-0.328811	1.17395	-0.28009	0.779408	RO	NS			OTU_0295	1.058	-0.0712347	0.381514	-0.186716	0.851883	RS	NS
OTU_0625	0.0313226	-0.337802	1.17398	-0.28774	0.773546	RO	NS			OTU_0296	0.0271947	-0.0903339	1.17646	-0.0767845	0.938795	RS	NS
OTU_0627	0.0971679	-0.535835	1.17299	-0.456812	0.647807	RO	NS			OTU_0297	0.328169	-0.396647	0.559174	-0.709344	0.478111	RS	NS
OTU_0629	0.0288109	-0.301695	1.1738	-0.257025	0.797159	RO	NS			OTU_0298	0.545232	0.69223	0.545593	1.26877	0.204524	RS	NS
OTU_0630	3.93229	0.506737	0.390278	1.2984	0.19415	RO	NS			OTU_0299	0.0881881	-0.0935094	1.17033	-0.0799001	0.936317	RS	NS
OTU_0632	0.0249598	-0.171548	1.1742	-0.146098	0.883844	RO	NS			OTU_0300	0.0169789	0.0590527	1.17635	0.0501998	0.959963	RS	NS
OTU_0634	0.0812483	-0.100025	1.17421	-0.0851848	0.932114	RO	NS			OTU_0301	0.0184208	-0.0974313	1.17642	-0.0828202	0.933994	RS	NS
OTU_0635	0.0469165	-0.0862547	1.17403	-0.0734686	0.941433	RO	NS			OTU_0302	1.09711	-0.110309	0.439004	-0.251272	0.801604	RS	NS
OTU_0638	0.0626452	-0.433322	1.1737	-0.369195	0.711983	RO	NS			OTU_0303	0.25733	0.11728	0.629755	0.186231	0.852264	RS	NS
OTU_0639	0.0952853	-0.320011	1.17373	-0.272644	0.785127	RO	NS			OTU_0304	0.0489717	-0.197498	1.176	-0.16794	0.866631	RS	NS
OTU_0641	0.0134421	-0.195162	1.17423	-0.166204	0.867997	RO	NS			OTU_0305	0.0183804	-0.0486587	1.17644	-0.0413611	0.967008	RS	NS
OTU_0643	13.6486	0.305569	0.216779	1.40959	0.158661	RO	NS			OTU_0306	0.0160024	0.0286262	1.17638	0.0243342	0.980586	RS	NS
OTU_0645	0.331036	0.0453791	0.883213	0.0513795	0.959023	RO	NS			OTU_0307	0.0253707	-0.0903339	1.17646	-0.0767845	0.938795	RS	NS
OTU_0646	0.188956	-0.329112	0.742985	-0.44296	0.657795	RO	NS			OTU_0308	17.2537	-0.0247809	0.10799	-0.229473	0.818502	RS	NS
OTU_0647	0.264459	0.208809	0.889094	0.234856	0.81432	RO	NS			OTU_0311	0.0565392	0.113269	1.17627	0.0962952	0.923286	RS	NS
OTU_0648	0.102385	-0.0987636	0.99979	-0.0987843	0.92131	RO	NS			OTU_0312	0.175631	-0.30869	1.17504	-0.262707	0.792777	RS	NS
OTU_0651	0.00957072	-0.313617	1.17401	-0.267134	0.789366	RO	NS			OTU_0313	0.051419	-0.1915	1.17592	-0.162851	0.870635	RS	NS
OTU_0654	0.0131754	-0.279048	1.17402	-0.237687	0.812124	RO	NS			OTU_0314	0.0190128	-0.0337081	1.17642	-0.0286532	0.977141	RS	NS
OTU_0659	0.0166709	-0.266876	1.17411	-0.227301	0.82019	RO	NS			OTU_0315	0.0205193	-0.0337081	1.17642	-0.0286532	0.977141	RS	NS
OTU_0663	0.128096	-0.549679	0.890032	-0.617594	0.536843	RO	NS			OTU_0316	0.0172065	-0.135657	1.17639	-0.115316	0.908195	RS	NS
OTU_0664	0.133378	0.0231148	0.997279	0.0231779	0.981508	RO	NS			OTU_0317	0.0209811	-0.00710444	1.17641	-0.00603908	0.995182	RS	NS
OTU_0665	1.81547	-0.0137944	0.469732	-0.0293664	0.976572	RO	NS			OTU_0318	0.0196536	0.0286262	1.17638	0.0243342	0.980586	RS	NS
OTU_0666	0.0499472	0.143051	1.17444	0.121804	0.903054	RO	NS			OTU_0320	0.43551	0.153014	0.522309	0.292957	0.769555	RS	NS
OTU_0667	0.260234	-0.0308625	0.623342	-0.0495114	0.960512	RO	NS			OTU_0321	0.521309	0.0311994	0.46784	0.0666881	0.94683	RS	NS
OTU_0668	0.0321252	-0.178546	1.17421	-0.152057	0.879142	RO	NS			OTU_0322	0.167254	-0.232593	0.850893	-0.273352	0.784583	RS	NS
OTU_0669	0.237586	-0.178546	1.17421	-0.152057	0.879142	RO	NS			OTU_0323	0.125762	-0.233656	1.17526	-0.198811	0.84241	RS	NS
OTU_0671	0.0216323	-0.323761	1.17397	-0.275784	0.782714	RO	NS			OTU_0324	0.0750852	-0.0274821	1.17634	-0.0233623	0.981361	RS	NS
OTU_0672	64.9892	-0.313371	0.292103	-1.07281	0.283358	RO	NS			OTU_0325	0.0415046	-0.10453	1.17638	-0.088857	0.929196	RS	NS
OTU_0673	0.940273	-0.131502	0.662284	-0.198558	0.842608	RO	NS			OTU_0326	0.176262	0.000447824	0.761161	0.000588344	0.999531	RS	NS
OTU_0674	0.0544973	-0.211622	1.17426	-0.180218	0.856981	RO	NS			OTU_0327	0.169979	-0.644969	1.17374	-0.549497	0.582664	RS	NS
OTU_0675	24.2002	0.552455	0.212576	2.59886	0.00935329	RO	NS			OTU_0328	0.0710811	-0.164168	1.17594	-0.139606	0.888971	RS	NS
OTU_0676	0.356841	0.186755	0.887141	0.210513	0.833267	RO	NS			OTU_0329	0.0389503	-0.203132	1.17608	-0.17272	0.862872	RS	NS
OTU_0680	0.0458934	-0.228271	1.17399	-0.19444	0.845831	RO	NS			OTU_0330	0.0182607	-0.0486587	1.17644	-0.0413611	0.967008	RS	NS
OTU_0681	0.00830109	-0.211622	1.17426	-0.180218	0.856981	RO	NS			OTU_0331	0.0194752	-0.135657	1.17639	-0.115316	0.908195	RS	NS
OTU_0682	0.0112511	-0.266877	1.17411	-0.227301	0.82019	RO	NS			OTU_0332	2.57025	-0.0750705	0.290471	-0.258444	0.796064	RS	NS
OTU_0683	21.6068	0.0557775	0.184596	0.30216	0.76253	RO	NS			OTU_0333	0.0348353	-0.0129305	1.1764	-0.0109915	0.99123	RS	NS
OTU_0684	8.50147	0.0860022	0.317286	0.271056	0.786348	RO	NS			OTU_0334	0.0394281	0.0989969	1.17631	0.0841587	0.93293	RS	NS
OTU_0685	0.0582319	-0.266876	1.17411	-0.227301	0.82019	RO	NS			OTU_0335	0.993297	-1.01663	0.568466	-1.78837	0.0737157	RS	NS
OTU_0686	2.3999	-0.028516	0.194228	-0.146817	0.883276	RO	NS			OTU_0336	0.376985	0.359636	0.442837	0.812119	0.416723	RS	NS
OTU_0688	0.235233	0.0352089	1.11001	0.0317196	0.974696	RO	NS			OTU_0337	0.416153	-0.0995946	0.40657	-0.244963	0.806485	RS	NS
OTU_0689	0.0329569	-0.298266	1.17392	-0.254077	0.799436	RO	NS			OTU_0338	0.241305	-0.216588	0.69048	-0.313677	0.753766	RS	NS
OTU_0691	0.297125	-0.511106	1.17322	-0.435645	0.663094	RO	NS			OTU_0339	0.0926592	-0.102593	1.17599	-0.0872396	0.930481	RS	NS
OTU_0692	2.10224	-0.000662632	0.23538	-0.00281516	0.997754	RO	NS			OTU_0340	0.0677592	-0.172095	1.17608	-0.14633	0.883661	RS	NS
OTU_0693	0.0652755	-0.281789	1.17353	-0.240121	0.810237	RO	NS			OTU_0341	0.0354742	-0.128336	1.17632	-0.1091	0.913123	RS	NS
OTU_0698	0.0769586	-0.434856	1.17328	-0.370633	0.710911	RO	NS			OTU_0343	1.21575	0.245144	0.199055	1.23154	0.21812	RS	NS
OTU_0699	0.0428244	-0.23606	1.17406	-0.201064	0.840649	RO	NS			OTU_0344	0.793863	0.375525	0.56064	0.669815	0.502976	RS	NS
OTU_0700	0.040729	-0.329446	1.17367	-0.280697	0.778942	RO	NS			OTU_0345	0.0923112	-0.313309	1.17527	-0.266585	0.789788	RS	NS
OTU_0703	0.0309571	-0.155972	1.17441	-0.132809	0.894345	RO	NS			OTU_0346	0.145114	0.125806	0.762472	0.164997	0.868946	RS	NS
OTU_0704	1.09411	-2.05895	1.17002	-1.75976	0.0784479	RO	NS			OTU_0347	0.102693	0.0388887	1.14821	0.033869	0.972982	RS	NS
OTU_0705	0.946508	-0.650653	0.609179	-1.06808	0.285483	RO	NS			OTU_0348	0.0603539	-0.00286452	1.17637	-0.00243505	0.998057	RS	NS
OTU_0706	0.273031	0.0749349	0.89953	0.0833045	0.933609	RO	NS			OTU_0349	0.03878	-0.00380345	1.17638	-0.00323319	0.99742	RS	NS
OTU_0707	0.0805921	0.183494	1.17418	0.156274	0.875817	RO	NS			OTU_0350	1.11761	0.413175	0.289228	1.42854	0.153136	RS	NS
OTU_0708	0.155988	0.0210393	0.827358	0.0254295	0.979712	RO	NS			OTU_0351	0.138378	-0.0397284	0.770364	-0.0515709	0.958871	RS	NS
OTU_0710	1.39307	-1.09145	0.695691	-1.56888	0.116677	RO	NS			OTU_0353	0.0756832	-0.192045	1.17596	-0.163309	0.870275	RS	NS
OTU_0711	0.0724572	-0.536135	1.17313	-0.457011	0.647663	RO	NS			OTU_0354	0.0577669	0.143736	1.17628	0.122195	0.902744	RS	NS
OTU_0712	0.0337949	-0.226763	1.17413	-0.193132	0.846855	RO	NS			OTU_0355	0.0412401	-0.0603118	1.17642	-0.0512671	0.959113	RS	NS
OTU_0714	0.00785547	-0.209831	1.17425	-0.178693	0.858179	RO	NS			OTU_0357	0.0150378	-0.00710444	1.17641	-0.00603908	0.995182	RS	NS
OTU_0715	0.010749	-0.32143	1.17398	-0.273796	0.784241	RO	NS			OTU_0358	24.7121	0.103013	0.131727	0.782024	0.434201	RS	NS
OTU_0716	0.0220722	-0.365122	1.17381	-0.311057	0.755757	RO	NS			OTU_0359	19.5065	-0.404529	0.394805	-1.02463	0.305539	RS	NS
OTU_0717	0.531938	0.0979169	0.757906	0.129194	0.897204	RO	NS			OTU_0360	4.18496	-0.202752	0.146134	-1.38744	0.165307	RS	NS
OTU_0720	0.834439	0.0556451	0.583559	0.0953547	0.924033	RO	NS			OTU_0361	7.12567	-0.0807759	0.485922	-0.166232	0.867974	RS	NS
OTU_0722	0.883876	-1.06193	0.703558	-1.50937	0.131205	RO	NS			OTU_0362	0.314661	-0.332276	0.457601	-0.726127	0.467761	RS	NS
OTU_0723	0.0134421	-0.195162	1.17423	-0.166204	0.867997	RO	NS			OTU_0363	0.172737	0.0375535	0.975674	0.0384898	0.969297	RS	NS
OTU_0726	0.010994	-0.211622	1.17426	-0.180218	0.856981	RO	NS			OTU_0364	0.142575	0.0131398	0.776606	0.0169196	0.986501	RS	NS
OTU_0727	0.0403263	-0.0968644	1.17406	-0.082504	0.934246	RO	NS			OTU_0365	1.15378	0.771251	0.573846	1.344	0.178947	RS	NS
OTU_0728	0.0190987	-0.195162	1.17423	-0.166204	0.867997	RO	NS			OTU_0366	31.9429	-0.0910218	0.0789548	-1.15283	0.248979	RS	NS
OTU_0731	2.92871	0.587717	0.511175	1.14974	0.250252	RO	NS			OTU_0367	3.32064	0.273297	0.416212	0.656629	0.511419	RS	NS
OTU_0732	0.420186	-0.519395	0.925348	-0.561297	0.574595	RO	NS			OTU_0368	1.16093	-0.115536	0.348071	-0.331931	0.739941	RS	NS
OTU_0733	8.2523	-0.0854059	0.214654	-0.397877	0.690721	RO	NS			OTU_0370	0.0885406	0.0970958	1.01891	0.0952938	0.924081	RS	NS
OTU_0735	0.0550266	-0.285283	1.17368	-0.243067	0.807953	RO	NS			OTU_0371	0.0229764	-0.0903339	1.17646	-0.0767845	0.938795	RS	NS
OTU_0736	0.0317717	-0.144975	1.17416	-0.123472	0.901734	RO	NS			OTU_0372	0.0181945	-0.00710444	1.17641	-0.00603908	0.995182	RS	NS
OTU_0737	0.194364	-0.270614	1.17362	-0.23058	0.817641	RO	NS			OTU_0375	0.464914	0.378403	0.575325	0.657719	0.510718	RS	NS
OTU_0739	0.916096	-0.460971	0.462657	-0.996355	0.319078	RO	NS			OTU_0376	0.197684	0.206254	0.773342	0.266704	0.789697	RS	NS
OTU_0743	0.121907	-0.244967	1.17325	-0.208793	0.834609	RO	NS			OTU_0377	0.0438274	-0.112586	1.17616	-0.0957231	0.923741	RS	NS
OTU_0744	0.0448527	-0.174169	1.17407	-0.148346	0.88207	RO	NS			OTU_0379	0.0205193	-0.0337081	1.17642	-0.0286532	0.977141	RS	NS
OTU_0747	0.0309571	-0.155972	1.17441	-0.132809	0.894345	RO	NS			OTU_0380	17.5098	0.163351	0.0994664	1.64227	0.100534	RS	NS
OTU_0748	0.0108414	-0.266877	1.17411	-0.227301	0.82019	RO	NS			OTU_0381	5.29439	-0.76648	0.303253	-2.52753	0.0114869	RS	NS
OTU_0750	0.163492	-0.266876	1.17411	-0.227301	0.82019	RO	NS			OTU_0382	16.3287	-0.407023	0.417772	-0.97427	0.329923	RS	NS
OTU_0753	0.0126371	-0.155972	1.17441	-0.132809	0.894345	RO	NS			OTU_0383	0.609594	-0.813081	0.953932	-0.852347	0.394022	RS	NS
OTU_0754	0.0932116	-0.157061	1.17404	-0.133778	0.893578	RO	NS			OTU_0384	0.124678	-0.0876906	1.12231	-0.078134	0.937721	RS	NS
OTU_0755	0.040048	-0.365122	1.17381	-0.311057	0.755757	RO	NS			OTU_0385	0.0975654	0.149925	1.17615	0.127471	0.898567	RS	NS
OTU_0756	0.0635607	-0.18784	1.17413	-0.159983	0.872895	RO	NS			OTU_0387	0.0215971	-0.0486587	1.17644	-0.0413611	0.967008	RS	NS
OTU_0757	0.264586	0.348764	0.826605	0.421923	0.673081	RO	NS			OTU_0388	2.6131	0.73704	0.709247	1.03919	0.298718	RS	NS
OTU_0759	0.0608708	-0.350307	1.17379	-0.298442	0.765366	RO	NS			OTU_0390	0.119406	-0.197119	1.17575	-0.167654	0.866855	RS	NS
OTU_0764	0.39419	0.345569	0.669094	0.516473	0.605524	RO	NS			OTU_0391	0.657927	0.591102	0.59831	0.987954	0.323175	RS	NS
OTU_0765	5.17956	0.284402	0.223859	1.27045	0.203925	RO	NS			OTU_0392	0.0566569	-0.105583	1.17624	-0.0897628	0.928476	RS	NS
OTU_0766	0.172063	0.0991538	1.02449	0.0967833	0.922899	RO	NS			OTU_0393	0.0389503	-0.203132	1.17608	-0.17272	0.862872	RS	NS
OTU_0768	0.368808	0.0845933	0.813878	0.103939	0.917218	RO	NS			OTU_0394	0.0189135	-0.105738	1.17647	-0.0898773	0.928385	RS	NS
OTU_0770	27.3522	-0.224155	0.24687	-0.90799	0.363884	RO	NS			OTU_0395	0.0347546	-0.227676	1.17599	-0.193603	0.846486	RS	NS
OTU_0774	0.0696118	-0.269006	1.17352	-0.229229	0.818691	RO	NS			OTU_0396	0.0312197	-0.152932	1.17624	-0.130018	0.896552	RS	NS
OTU_0780	0.0281272	-0.335115	1.17376	-0.285506	0.775256	RO	NS			OTU_0397	4.83517	-0.0573872	0.131995	-0.434768	0.663731	RS	NS
OTU_0781	0.0544973	-0.211622	1.17426	-0.180218	0.856981	RO	NS			OTU_0398	0.123259	-0.0633001	0.86696	-0.0730139	0.941795	RS	NS
OTU_0783	0.151991	0.0781878	0.779332	0.100327	0.920085	RO	NS			OTU_0399	0.660667	-0.0906822	0.419601	-0.216115	0.828898	RS	NS
OTU_0785	0.0553203	-0.0535248	1.17397	-0.0455931	0.963635	RO	NS			OTU_0400	0.98787	-0.0606702	0.341997	-0.1774	0.859194	RS	NS
OTU_0786	0.0593965	-0.227453	1.17427	-0.193697	0.846413	RO	NS			OTU_0401	0.0708362	-0.31715	1.17549	-0.269802	0.787313	RS	NS
OTU_0799	0.52666	-0.300965	0.859054	-0.350345	0.72608	RO	NS			OTU_0402	0.0760869	-0.0430176	1.17625	-0.0365719	0.970826	RS	NS
OTU_0800	0.0465012	-0.178546	1.17421	-0.152057	0.879142	RO	NS			OTU_0403	0.0182607	-0.0486587	1.17644	-0.0413611	0.967008	RS	NS
OTU_0801	0.00785547	-0.209831	1.17425	-0.178693	0.858179	RO	NS			OTU_0404	1.39912	-0.558844	0.230295	-2.42665	0.0152391	RS	NS
OTU_0805	0.0293823	-0.282408	1.17413	-0.240525	0.809924	RO	NS			OTU_0405	0.484931	-0.118661	0.380821	-0.311592	0.755351	RS	NS
OTU_0810	0.0487321	-0.0382274	1.17433	-0.0325526	0.974031	RO	NS			OTU_0406	0.0171826	-0.0486587	1.17644	-0.0413611	0.967008	RS	NS
OTU_0811	0.326654	-0.0203687	1.07476	-0.0189518	0.98488	RO	NS			OTU_0407	0.0200841	0.0783834	1.17634	0.0666334	0.946874	RS	NS
OTU_0812	0.0873736	-0.144975	1.17416	-0.123472	0.901734	RO	NS			OTU_0408	0.0253707	-0.0903339	1.17646	-0.0767845	0.938795	RS	NS
OTU_0813	0.988789	-0.752607	0.543067	-1.38585	0.165794	RO	NS			OTU_0409	0.0204375	-0.135657	1.17639	-0.115316	0.908195	RS	NS
OTU_0814	0.605342	0.21919	0.729805	0.30034	0.763918	RO	NS			OTU_0410	0.0160911	-0.0486587	1.17644	-0.0413611	0.967008	RS	NS
OTU_0818	1.82441	-1.25832	0.579424	-2.17168	0.0298801	RO	NS			OTU_0411	10.6921	1.3738	0.635256	2.16259	0.030573	RS	NS
OTU_0824	0.016713	-0.280095	1.17401	-0.23858	0.811431	RO	NS			OTU_0412	0.228048	-0.310432	0.591256	-0.525038	0.599557	RS	NS
OTU_0826	1.2038	-0.13549	0.658155	-0.205864	0.836897	RO	NS			OTU_0413	0.016526	-0.0974313	1.17642	-0.0828202	0.933994	RS	NS
OTU_0828	0.448996	-0.43333	0.949793	-0.456236	0.64822	RO	NS			OTU_0414	0.0731668	0.0884486	1.17631	0.0751915	0.940062	RS	NS
OTU_0829	0.0681648	-0.117118	1.1741	-0.0997508	0.920542	RO	NS			OTU_0415	0.0338715	0.0228009	1.17637	0.0193823	0.984536	RS	NS
OTU_0830	0.231868	0.095559	1.11241	0.085903	0.931544	RO	NS			OTU_0416	0.0160911	-0.0486587	1.17644	-0.0413611	0.967008	RS	NS
OTU_0832	0.0127671	-0.277966	1.17402	-0.236764	0.81284	RO	NS			OTU_0417	0.0435602	-0.0974313	1.17642	-0.0828202	0.933994	RS	NS
OTU_0834	0.034692	-0.0829342	1.17443	-0.0706167	0.943703	RO	NS			OTU_0418	0.0218063	-0.135657	1.17639	-0.115316	0.908195	RS	NS
OTU_0838	0.0134421	-0.195162	1.17423	-0.166204	0.867997	RO	NS			OTU_0419	3.59199	0.116879	0.296526	0.394162	0.693462	RS	NS
OTU_0843	1.48298	-1.51939	0.836806	-1.81571	0.0694154	RO	NS			OTU_0420	0.161143	0.0560194	1.17631	0.047623	0.962017	RS	NS
OTU_0844	0.0144523	-0.280095	1.17401	-0.23858	0.811431	RO	NS			OTU_0421	0.663152	-0.0499211	0.373023	-0.133829	0.893538	RS	NS
OTU_0846	0.359087	-0.223438	1.04705	-0.213398	0.831017	RO	NS			OTU_0422	0.234439	-0.481619	1.08696	-0.443086	0.657703	RS	NS
OTU_0847	0.0864715	-0.0645252	1.1738	-0.054971	0.956162	RO	NS			OTU_0423	9.53234	-0.675544	0.473113	-1.42787	0.153329	RS	NS
OTU_0850	0.0108414	-0.266877	1.17411	-0.227301	0.82019	RO	NS			OTU_0425	0.227746	0.0721132	0.54023	0.133486	0.893809	RS	NS
OTU_0851	0.0948583	-0.150328	1.16273	-0.129289	0.897129	RO	NS			OTU_0426	0.241916	-0.0184317	0.53655	-0.0343522	0.972596	RS	NS
OTU_0855	0.0207969	-0.323761	1.17397	-0.275784	0.782714	RO	NS			OTU_0427	0.16744	-0.182416	0.687003	-0.265525	0.790605	RS	NS
OTU_0860	43.1297	0.524042	0.192896	2.71671	0.00659334	RO	NS			OTU_0428	0.127538	-0.0283243	0.772794	-0.0366517	0.970763	RS	NS
OTU_0861	0.0232506	-0.211622	1.17426	-0.180218	0.856981	RO	NS			OTU_0429	0.0711374	0.0878613	1.17625	0.0746964	0.940456	RS	NS
OTU_0863	0.0460913	-0.423512	1.17344	-0.360916	0.718162	RO	NS			OTU_0430	2.46826	0.205736	0.218068	0.94345	0.345451	RS	NS
OTU_0866	0.032111	-0.413487	1.17365	-0.352309	0.724607	RO	NS			OTU_0431	0.459944	-0.220064	0.597278	-0.368444	0.712542	RS	NS
OTU_0868	2.22314	0.116435	0.587093	0.198325	0.842791	RO	NS			OTU_0432	2.29307	-0.170657	0.366791	-0.465269	0.641739	RS	NS
OTU_0869	0.0614851	-0.254723	1.1742	-0.216932	0.828261	RO	NS			OTU_0433	0.707026	0.268741	0.387566	0.693409	0.488053	RS	NS
OTU_0870	0.826625	-0.114746	0.450318	-0.254811	0.798869	RO	NS			OTU_0434	0.823453	0.267646	0.659234	0.405996	0.684746	RS	NS
OTU_0871	0.185851	-0.0859499	0.533581	-0.161081	0.872029	RO	NS			OTU_0435	0.21907	-0.206737	0.684287	-0.30212	0.76256	RS	NS
OTU_0872	0.237939	-0.0130693	0.720157	-0.0181479	0.985521	RO	NS			OTU_0436	0.0742431	-0.187937	1.17602	-0.159808	0.873033	RS	NS
OTU_0873	0.213803	-0.103513	1.17321	-0.0882308	0.929693	RO	NS			OTU_0438	0.0250329	-0.168816	1.17624	-0.143522	0.885878	RS	NS
OTU_0874	0.099019	-0.408254	1.15132	-0.354596	0.722892	RO	NS			OTU_0440	23.4365	-0.73621	0.346649	-2.12379	0.0336876	RS	NS
OTU_0875	0.0134421	-0.195162	1.17423	-0.166204	0.867997	RO	NS			OTU_0441	3.2017	0.0171271	0.172615	0.0992212	0.920963	RS	NS
OTU_0880	0.110498	-0.169259	1.13365	-0.149305	0.881313	RO	NS			OTU_0442	2.77876	-0.759092	0.356187	-2.13116	0.0330757	RS	NS
OTU_0881	0.00667467	-0.227453	1.17427	-0.193697	0.846413	RO	NS			OTU_0443	2.08993	0.103386	0.228545	0.452367	0.651005	RS	NS
OTU_0885	2.2128	0.145021	0.193428	0.749738	0.453412	RO	NS			OTU_0444	1.62473	-0.0868779	0.168645	-0.515154	0.606445	RS	NS
OTU_0886	0.360273	-0.485005	0.556537	-0.871469	0.383498	RO	NS			OTU_0445	0.958848	-0.177117	0.254588	-0.695701	0.486616	RS	NS
OTU_0887	0.326297	-0.307023	0.40168	-0.764347	0.44466	RO	NS			OTU_0446	0.599344	0.0100869	0.30559	0.0330079	0.973668	RS	NS
OTU_0888	0.0691264	-0.353036	0.917908	-0.384609	0.700527	RO	NS			OTU_0447	0.0204406	-0.0974313	1.17642	-0.0828202	0.933994	RS	NS
OTU_0889	0.0393156	-0.409907	1.17359	-0.349276	0.726882	RO	NS			OTU_0448	0.0237433	-0.308161	1.17579	-0.262087	0.793254	RS	NS
OTU_0890	0.12297	-0.266876	1.17411	-0.227301	0.82019	RO	NS			OTU_0449	0.0164361	-0.00710444	1.17641	-0.00603908	0.995182	RS	NS
OTU_0893	0.148138	-0.0317102	0.664153	-0.0477453	0.961919	RO	NS			OTU_0450	0.892734	-0.142823	0.217889	-0.655482	0.512157	RS	NS
OTU_0895	0.0800428	-0.23606	1.17406	-0.201064	0.840649	RO	NS			OTU_0451	4.7492	0.13413	0.138977	0.965121	0.334484	RS	NS
OTU_0896	0.107846	-0.0398106	1.17451	-0.0338954	0.972961	RO	NS			OTU_0452	0.441658	0.172769	0.336545	0.513362	0.607698	RS	NS
OTU_0900	0.0173237	-0.280095	1.17401	-0.23858	0.811431	RO	NS			OTU_0454	0.114229	-0.296717	0.987988	-0.300324	0.76393	RS	NS
OTU_0902	0.0642357	-0.105544	1.17435	-0.089875	0.928387	RO	NS			OTU_0455	0.0544544	-0.377664	1.17534	-0.321323	0.747965	RS	NS
OTU_0905	0.0108414	-0.266877	1.17411	-0.227301	0.82019	RO	NS			OTU_0456	0.0657574	0.0585353	1.17634	0.0497603	0.960313	RS	NS
OTU_0910	0.34117	-0.160989	0.945113	-0.170338	0.864744	RO	NS			OTU_0457	0.021808	-0.0337081	1.17642	-0.0286532	0.977141	RS	NS
OTU_0911	4.25809	-0.137522	0.325827	-0.42207	0.672974	RO	NS			OTU_0458	0.021808	-0.0337081	1.17642	-0.0286532	0.977141	RS	NS
OTU_0912	0.10563	-0.133839	1.17426	-0.113977	0.909256	RO	NS			OTU_0459	0.0164361	-0.00710444	1.17641	-0.00603908	0.995182	RS	NS
OTU_0913	0.226823	-0.045638	0.595933	-0.0765825	0.938956	RO	NS			OTU_0460	2.46099	0.322962	0.158767	2.03419	0.0419325	RS	NS
OTU_0914	0.581931	0.589027	0.739923	0.796065	0.425994	RO	NS			OTU_0461	0.595008	-0.355693	0.476585	-0.746337	0.455464	RS	NS
OTU_0915	0.0117854	-0.266877	1.17411	-0.227301	0.82019	RO	NS			OTU_0462	2.12267	-0.228837	0.19641	-1.1651	0.243979	RS	NS
OTU_0916	0.0459082	-0.174169	1.17407	-0.148346	0.88207	RO	NS			OTU_0463	0.340989	-0.102346	0.779154	-0.131355	0.895494	RS	NS
OTU_0922	0.0582319	-0.266876	1.17411	-0.227301	0.82019	RO	NS			OTU_0464	0.169341	0.0134988	0.849907	0.0158827	0.987328	RS	NS
OTU_0923	0.0582319	-0.266876	1.17411	-0.227301	0.82019	RO	NS			OTU_0465	0.385202	-0.100261	0.477765	-0.209854	0.833782	RS	NS
OTU_0926	5.07775	0.973568	0.41105	2.36849	0.0178609	RO	NS			OTU_0466	0.07873	0.0368756	1.17634	0.0313478	0.974992	RS	NS
OTU_0927	0.339403	-1.04107	1.17138	-0.888753	0.374136	RO	NS			OTU_0467	0.0242574	-0.168816	1.17624	-0.143522	0.885878	RS	NS
OTU_0928	0.751466	-0.255614	0.960889	-0.266018	0.790226	RO	NS			OTU_0469	6.49572	-0.0772018	0.258648	-0.298482	0.765335	RS	NS
OTU_0929	0.0321518	-0.361973	1.17375	-0.308391	0.757785	RO	NS			OTU_0470	0.0228597	-0.0903339	1.17646	-0.0767845	0.938795	RS	NS
OTU_0930	0.0198814	-0.266876	1.17411	-0.227301	0.82019	RO	NS			OTU_0472	0.395545	0.236379	0.719488	0.328538	0.742505	RS	NS
OTU_0936	0.0551815	-0.23606	1.17406	-0.201063	0.840649	RO	NS			OTU_0473	0.487019	0.285382	0.441841	0.645893	0.518349	RS	NS
OTU_0938	0.0315728	-0.435801	1.17357	-0.371346	0.71038	RO	NS			OTU_0474	0.0874833	0.0202742	1.16599	0.017388	0.986127	RS	NS
OTU_0940	0.0231875	-0.30469	1.17383	-0.259568	0.795197	RO	NS			OTU_0475	0.0689249	0.0111506	1.17636	0.00947894	0.992437	RS	NS
OTU_0942	0.0948977	-0.22416	1.17412	-0.190919	0.848589	RO	NS			OTU_0476	0.0403329	-0.0337081	1.17642	-0.0286532	0.977141	RS	NS
OTU_0945	0.0105906	-0.211622	1.17426	-0.180218	0.856981	RO	NS			OTU_0477	0.0341237	-0.121304	1.17624	-0.103128	0.917861	RS	NS
OTU_0949	0.352217	0.077831	0.528931	0.147148	0.883015	RO	NS			OTU_0478	0.0363322	-0.227676	1.17599	-0.193603	0.846486	RS	NS
OTU_0950	0.426588	-0.57884	0.953061	-0.607348	0.54362	RO	NS			OTU_0479	0.016526	-0.0974313	1.17642	-0.0828202	0.933994	RS	NS
OTU_0951	0.17589	-0.463778	1.10734	-0.418821	0.675347	RO	NS			OTU_0480	0.0184208	-0.0974313	1.17642	-0.0828202	0.933994	RS	NS
OTU_0952	0.579487	-0.16035	0.811708	-0.197546	0.8434	RO	NS			OTU_0481	11.2429	-0.201857	0.469813	-0.429654	0.667447	RS	NS
OTU_0954	0.0131713	-0.195162	1.17423	-0.166204	0.867997	RO	NS			OTU_0482	4.50322	0.259204	0.192692	1.34517	0.178571	RS	NS
OTU_0955	0.0245246	-0.200194	1.17435	-0.170472	0.864639	RO	NS			OTU_0483	0.429556	-0.151907	0.550878	-0.275754	0.782737	RS	NS
OTU_0958	0.307795	-0.500767	0.974971	-0.513622	0.607516	RO	NS			OTU_0484	0.414207	-0.49229	0.427255	-1.15222	0.249233	RS	NS
OTU_0959	2.53546	0.126696	0.265513	0.477175	0.633237	RO	NS			OTU_0485	0.127927	0.118626	1.13023	0.104957	0.91641	RS	NS
OTU_0967	0.0154428	-0.282408	1.17413	-0.240525	0.809924	RO	NS			OTU_0486	0.0572151	-0.105583	1.17624	-0.0897628	0.928476	RS	NS
OTU_0968	34.7819	0.115801	0.483843	0.239335	0.810846	RO	NS			OTU_0488	0.0353496	-0.0337081	1.17642	-0.0286532	0.977141	RS	NS
OTU_0969	0.167613	0.207501	0.73747	0.281369	0.778428	RO	NS			OTU_0489	0.0220874	-0.0486587	1.17644	-0.0413611	0.967008	RS	NS
OTU_0970	3.50633	0.151219	0.449984	0.336054	0.73683	RO	NS			OTU_0490	1.58171	-0.102222	0.397202	-0.257356	0.796904	RS	NS
OTU_0971	1.07079	-0.0313316	0.362857	-0.086347	0.931191	RO	NS			OTU_0492	3.08254	-0.0335006	0.311121	-0.107677	0.914252	RS	NS
OTU_0973	14.2608	-0.441319	0.203246	-2.17136	0.0299041	RO	NS			OTU_0493	2.81519	0.314395	0.377526	0.832777	0.404971	RS	NS
OTU_0975	0.100297	-0.463291	1.01652	-0.455763	0.648561	RO	NS			OTU_0494	0.208484	-0.187692	0.576123	-0.325785	0.744587	RS	NS
OTU_0982	0.0140086	-0.341945	1.1739	-0.291291	0.770829	RO	NS			OTU_0495	1.46421	-0.371865	0.484236	-0.767941	0.442522	RS	NS
OTU_0984	0.0243972	-0.292126	1.17395	-0.24884	0.803485	RO	NS			OTU_0496	11.6825	0.304213	0.309792	0.981992	0.326104	RS	NS
OTU_0985	0.413147	-0.0585982	0.441431	-0.132746	0.894394	RO	NS			OTU_0497	0.358374	-0.578434	0.56247	-1.02838	0.303771	RS	NS
OTU_0986	18.6	0.315772	0.260687	1.21131	0.225778	RO	NS			OTU_0498	0.144547	0.165277	1.176	0.140542	0.888232	RS	NS
OTU_0991	0.0619818	-0.308575	1.17394	-0.262854	0.792663	RO	NS			OTU_0499	0.0976398	-0.0275002	1.14989	-0.0239155	0.98092	RS	NS
OTU_0992	0.0922129	-0.653248	1.17296	-0.556922	0.577581	RO	NS			OTU_0500	0.0231476	-0.0974313	1.17642	-0.0828202	0.933994	RS	NS
OTU_0994	0.0120394	-0.111354	1.17448	-0.0948117	0.924464	RO	NS			OTU_0501	0.0480956	-0.0395343	1.17641	-0.0336059	0.973191	RS	NS
OTU_0998	0.0245272	-0.38565	1.17372	-0.32857	0.742481	RO	NS			OTU_0502	0.0242574	-0.168816	1.17624	-0.143522	0.885878	RS	NS
OTU_1001	0.00831884	-0.200194	1.17435	-0.170472	0.864639	RO	NS			OTU_0503	0.0229764	-0.0903339	1.17646	-0.0767845	0.938795	RS	NS
OTU_1004	0.0346473	-0.320011	1.17373	-0.272645	0.785126	RO	NS			OTU_0504	1.12316	0.0534256	0.329247	0.162266	0.871096	RS	NS
OTU_1007	0.0127671	-0.277966	1.17402	-0.236764	0.81284	RO	NS			OTU_0505	3.22597	-0.0656807	0.121616	-0.540065	0.589152	RS	NS
OTU_1008	0.00976529	-0.124227	1.17446	-0.105774	0.915762	RO	NS			OTU_0506	0.686715	-0.0736728	0.324695	-0.226898	0.820503	RS	NS
OTU_1011	5.37938	0.980425	0.475807	2.06055	0.039346	RO	NS			OTU_0507	0.629109	-0.0889517	0.280496	-0.317123	0.751151	RS	NS
OTU_1012	1.29881	-0.283049	0.391187	-0.723564	0.469333	RO	NS			OTU_0508	0.260779	0.0800892	0.847255	0.0945279	0.92469	RS	NS
OTU_1014	0.0268842	-0.144975	1.17416	-0.123472	0.901734	RO	NS			OTU_0509	0.23869	-0.104555	0.673732	-0.155188	0.876673	RS	NS
OTU_1015	1.22862	-0.530896	0.475721	-1.11598	0.26443	RO	NS			OTU_0510	0.219964	-0.08864	0.63584	-0.139406	0.889129	RS	NS
OTU_1016	0.733711	-0.35941	0.390231	-0.921018	0.357041	RO	NS			OTU_0511	0.108548	-0.0352145	0.988998	-0.0356062	0.971596	RS	NS
OTU_1017	0.0340305	-0.178546	1.17421	-0.152057	0.879142	RO	NS			OTU_0512	0.0368258	-0.10453	1.17638	-0.088857	0.929196	RS	NS
OTU_1018	0.0190987	-0.195162	1.17423	-0.166204	0.867997	RO	NS			OTU_0513	0.0183804	-0.0486587	1.17644	-0.0413611	0.967008	RS	NS
OTU_1021	0.157879	-0.150024	0.742021	-0.202182	0.839774	RO	NS			OTU_0514	0.140477	-0.24751	1.17514	-0.210621	0.833183	RS	NS
OTU_1023	0.0232506	-0.211622	1.17426	-0.180218	0.856981	RO	NS			OTU_0515	0.0799252	-0.160313	1.17591	-0.136331	0.89156	RS	NS
OTU_1025	0.148061	-0.335873	0.975548	-0.344292	0.730627	RO	NS			OTU_0516	0.222376	0.218032	0.692939	0.314649	0.753028	RS	NS
OTU_1030	13.1411	-0.851511	0.319273	-2.66703	0.00765245	RO	NS			OTU_0517	0.0230011	-0.168816	1.17624	-0.143522	0.885878	RS	NS
OTU_1031	0.0775421	-0.217997	1.17336	-0.185789	0.852611	RO	NS			OTU_0518	114.093	-0.133108	0.0813921	-1.63539	0.101967	RS	NS
OTU_1032	0.388487	-0.367073	0.492063	-0.745987	0.455675	RO	NS			OTU_0519	13.8024	-0.60239	0.418774	-1.43846	0.150304	RS	NS
OTU_1033	0.242435	-0.178546	1.17421	-0.152057	0.879142	RO	NS			OTU_0520	0.614788	0.053318	0.419835	0.126997	0.898942	RS	NS
OTU_1034	0.660042	0.226055	0.584157	0.386976	0.698774	RO	NS			OTU_0521	0.640583	0.0949332	0.309685	0.306547	0.759188	RS	NS
OTU_1035	0.252254	-0.329806	0.791423	-0.416726	0.676879	RO	NS			OTU_0523	0.0552623	-0.15033	1.17599	-0.127833	0.898281	RS	NS
OTU_1036	0.0300712	-0.30978	1.17385	-0.263901	0.791856	RO	NS			OTU_0524	0.2286	-0.117094	0.636259	-0.184035	0.853986	RS	NS
OTU_1037	0.317821	-0.534823	0.94988	-0.563043	0.573406	RO	NS			OTU_0525	0.178067	0.0700648	0.787857	0.0889309	0.929137	RS	NS
OTU_1038	0.0490858	-0.323761	1.17397	-0.275784	0.782714	RO	NS			OTU_0526	0.0167992	-0.168816	1.17624	-0.143522	0.885878	RS	NS
OTU_1039	1.1973	0.0658344	0.367042	0.179365	0.857651	RO	NS			OTU_0527	0.0405105	-0.075262	1.17644	-0.0639742	0.948991	RS	NS
OTU_1040	0.0193413	-0.195162	1.17423	-0.166204	0.867997	RO	NS			OTU_0528	0.0183804	-0.0486587	1.17644	-0.0413611	0.967008	RS	NS
OTU_1041	0.550597	-0.329597	0.368933	-0.89338	0.371654	RO	NS			OTU_0529	1.11361	-0.849997	0.854492	-0.99474	0.319863	RS	NS
OTU_1043	0.148232	0.165022	1.16203	0.142011	0.887071	RO	NS			OTU_0530	13.7689	-0.0352219	0.186184	-0.189178	0.849954	RS	NS
OTU_1045	0.0544973	-0.211622	1.17426	-0.180218	0.856981	RO	NS			OTU_0531	0.57712	-0.0770614	1.09577	-0.0703265	0.943934	RS	NS
OTU_1047	0.17819	-0.195162	1.17423	-0.166204	0.867997	RO	NS			OTU_0532	0.245031	0.158456	0.768004	0.206322	0.83654	RS	NS
OTU_1051	0.0582491	-0.178546	1.17421	-0.152057	0.879142	RO	NS			OTU_0533	0.0368536	-0.082025	1.17641	-0.0697249	0.944413	RS	NS
OTU_1054	0.0357696	-0.219858	1.17403	-0.187269	0.85145	RO	NS			OTU_0534	0.0329158	-0.0337081	1.17642	-0.0286532	0.977141	RS	NS
OTU_1058	90.2764	0.46091	0.159824	2.88386	0.00392838	RO	NS			OTU_0535	0.0196536	0.0286262	1.17638	0.0243342	0.980586	RS	NS
OTU_1059	6.10279	-0.192367	0.567801	-0.338792	0.734766	RO	NS			OTU_0536	18.0554	0.133516	0.170119	0.784841	0.432547	RS	NS
OTU_1060	0.12853	0.0495933	1.03146	0.0480809	0.961652	RO	NS			OTU_0537	15.4368	0.221095	0.161953	1.36517	0.172199	RS	NS
OTU_1061	0.0331124	-0.350307	1.17379	-0.298442	0.765366	RO	NS			OTU_0538	0.728016	-0.527871	0.452155	-1.16746	0.243026	RS	NS
OTU_1062	0.031462	-0.147771	1.17414	-0.125854	0.899847	RO	NS			OTU_0539	2.62552	-0.00635446	0.200495	-0.0316938	0.974716	RS	NS
OTU_1064	0.640441	0.157593	0.528727	0.298061	0.765656	RO	NS			OTU_0540	22.7806	-0.0732018	0.251003	-0.291638	0.770564	RS	NS
OTU_1066	0.109508	0.0632232	1.17449	0.0538302	0.95707	RO	NS			OTU_0541	0.314533	0.455077	0.510004	0.892301	0.372232	RS	NS
OTU_1068	0.0153688	-0.350103	1.17386	-0.298248	0.765514	RO	NS			OTU_0542	0.360328	-0.743753	0.757121	-0.982343	0.325931	RS	NS
OTU_1071	0.376967	0.0450588	0.463794	0.0971524	0.922605	RO	NS			OTU_0543	0.407107	-0.639285	0.555554	-1.15072	0.249849	RS	NS
OTU_1073	0.18117	-0.318264	0.974319	-0.326653	0.74393	RO	NS			OTU_0544	7.54795	0.0119436	0.200371	0.0596078	0.952468	RS	NS
OTU_1078	0.011785	-0.266877	1.17411	-0.227301	0.82019	RO	NS			OTU_0545	0.0339606	-0.0187564	1.1764	-0.0159439	0.987279	RS	NS
OTU_1082	0.0219881	-0.178546	1.17421	-0.152057	0.879142	RO	NS			OTU_0546	0.0161258	-0.254266	1.17601	-0.216212	0.828823	RS	NS
OTU_1084	0.0173237	-0.280095	1.17401	-0.23858	0.811431	RO	NS			OTU_0547	34.1752	-0.00461865	0.0765955	-0.0602992	0.951917	RS	NS
OTU_1085	0.0216323	-0.323761	1.17397	-0.275784	0.782714	RO	NS			OTU_0548	5.44189	-0.262276	0.216796	-1.20978	0.226362	RS	NS
OTU_1087	0.0977791	-0.192349	1.17315	-0.163959	0.869763	RO	NS			OTU_0549	0.720126	0.358042	0.692492	0.517033	0.605133	RS	NS
OTU_1088	4.78482	0.446477	0.374384	1.19256	0.23304	RO	NS			OTU_0550	0.496575	-0.176017	0.439674	-0.400334	0.688911	RS	NS
OTU_1089	2.01308	-0.407646	0.760383	-0.536106	0.591885	RO	NS			OTU_0551	2.67225	0.193136	0.149148	1.29493	0.195345	RS	NS
OTU_1090	0.203776	-0.564266	1.08347	-0.520796	0.602509	RO	NS			OTU_0552	0.108175	-0.00624701	0.9843	-0.00634666	0.994936	RS	NS
OTU_1091	0.106715	-0.542041	1.17297	-0.462109	0.644003	RO	NS			OTU_0553	0.0640773	-0.112378	1.17632	-0.0955331	0.923891	RS	NS
OTU_1092	0.0289047	-0.318018	1.17374	-0.270943	0.786435	RO	NS			OTU_0554	0.0493041	-0.152932	1.17624	-0.130018	0.896552	RS	NS
OTU_1093	0.318393	-0.32418	0.960206	-0.337615	0.735654	RO	NS			OTU_0555	0.0230011	-0.168816	1.17624	-0.143522	0.885878	RS	NS
OTU_1094	0.0746426	0.14254	0.923695	0.154315	0.877361	RO	NS			OTU_0556	0.017032	-0.0337081	1.17642	-0.0286532	0.977141	RS	NS
OTU_1096	0.423589	-0.263294	0.50225	-0.524229	0.600119	RO	NS			OTU_0557	5.65049	0.110355	0.557099	0.198089	0.842975	RS	NS
OTU_1101	51.9695	1.05571	0.198612	5.31546	1.0639e-07	RO	Enriched			OTU_0558	1.09743	0.06963	0.477999	0.14567	0.884182	RS	NS
OTU_1106	0.0134421	-0.195162	1.17423	-0.166204	0.867997	RO	NS			OTU_0559	1.29676	-0.231399	0.759357	-0.30473	0.760572	RS	NS
OTU_1112	46.6199	0.472075	0.171821	2.74749	0.00600537	RO	Enriched			OTU_0560	1.53952	0.135412	0.184059	0.735697	0.461915	RS	NS
OTU_1113	3.93379	0.615798	0.521917	1.17988	0.238049	RO	NS			OTU_0561	0.767252	-0.46919	0.451175	-1.03993	0.298373	RS	NS
OTU_1114	12.0442	0.355559	0.218896	1.62433	0.104305	RO	NS			OTU_0562	0.366014	0.571166	0.589256	0.9693	0.332396	RS	NS
OTU_1115	0.00976529	-0.124227	1.17446	-0.105774	0.915762	RO	NS			OTU_0563	0.227159	0.178229	0.83492	0.213468	0.830962	RS	NS
OTU_1116	0.210873	-0.292763	0.948656	-0.308608	0.75762	RO	NS			OTU_0564	0.0400671	0.033641	1.17635	0.0285977	0.977185	RS	NS
OTU_1117	2.6476	-0.654329	0.419799	-1.55867	0.119074	RO	NS			OTU_0565	0.0576703	-0.0362331	1.17638	-0.0308006	0.975429	RS	NS
OTU_1118	0.837703	0.0423554	0.802708	0.0527657	0.957919	RO	NS			OTU_0567	24.2442	-0.264255	0.187621	-1.40845	0.158998	RS	NS
OTU_1119	0.923075	-0.398874	0.440786	-0.904915	0.365511	RO	NS			OTU_0569	0.0228597	-0.0903339	1.17646	-0.0767845	0.938795	RS	NS
OTU_1120	0.062332	-0.0202627	1.17426	-0.0172557	0.986233	RO	NS			OTU_0570	0.0209811	-0.00710444	1.17641	-0.00603908	0.995182	RS	NS
OTU_1121	0.168739	-0.0987398	0.751328	-0.13142	0.895443	RO	NS			OTU_0571	31.2061	-0.104879	0.140593	-0.745972	0.455684	RS	NS
OTU_1123	0.21601	-0.169124	0.857861	-0.197146	0.843714	RO	NS			OTU_0572	17.9881	-0.0891781	0.114885	-0.776237	0.437609	RS	NS
OTU_1124	0.0167078	-0.0590811	1.17456	-0.0503006	0.959883	RO	NS			OTU_0573	0.297728	0.234075	0.758207	0.308722	0.757533	RS	NS
OTU_1126	0.0352041	-0.340466	1.17374	-0.29007	0.771763	RO	NS			OTU_0574	0.74675	0.389632	0.502518	0.775359	0.438127	RS	NS
OTU_1127	0.0933779	0.00037915	1.17432	0.000322869	0.999742	RO	NS			OTU_0578	0.0655544	-0.0512682	1.17628	-0.043585	0.965235	RS	NS
OTU_1129	0.188735	0.196968	0.475256	0.414445	0.678548	RO	NS			OTU_0579	0.0561262	0.0228009	1.17637	0.0193823	0.984536	RS	NS
OTU_1130	0.0593965	-0.227453	1.17427	-0.193697	0.846413	RO	NS			OTU_0580	0.0302562	0.134307	1.1763	0.114178	0.909097	RS	NS
OTU_1131	0.497269	-0.0216058	0.534117	-0.0404514	0.967733	RO	NS			OTU_0581	0.0237433	-0.308161	1.17579	-0.262087	0.793254	RS	NS
OTU_1135	0.0188957	-0.194323	1.17423	-0.165489	0.868559	RO	NS			OTU_0582	0.0302562	0.134307	1.1763	0.114178	0.909097	RS	NS
OTU_1137	0.153282	-0.367896	1.09927	-0.334673	0.737872	RO	NS			OTU_0583	0.0422455	-0.0891225	1.17637	-0.0757606	0.93961	RS	NS
OTU_1139	0.00691504	-0.213735	1.17426	-0.182017	0.85557	RO	NS			OTU_0584	0.0307111	-0.168816	1.17624	-0.143522	0.885878	RS	NS
OTU_1147	0.790129	0.527528	0.756236	0.697571	0.485446	RO	NS			OTU_0586	7.79965	-0.0128581	0.171551	-0.0749522	0.940253	RS	NS
OTU_1148	5.62267	-0.727632	0.776949	-0.936525	0.349003	RO	NS			OTU_0587	1.68858	0.0106183	0.219308	0.0484174	0.961384	RS	NS
OTU_1149	0.83964	0.145868	0.425228	0.343034	0.731573	RO	NS			OTU_0588	3.98809	-0.410498	0.395697	-1.03741	0.299547	RS	NS
OTU_1150	0.281163	-0.335287	0.770854	-0.434955	0.663595	RO	NS			OTU_0589	0.323407	-0.126514	0.648107	-0.195206	0.845232	RS	NS
OTU_1151	1.68054	-0.50783	0.417189	-1.21727	0.223503	RO	NS			OTU_0592	0.335682	-0.175565	0.465768	-0.376937	0.70622	RS	NS
OTU_1152	0.0439734	-0.391561	1.1735	-0.33367	0.738628	RO	NS			OTU_0593	0.0730423	-0.181679	1.17574	-0.154523	0.877197	RS	NS
OTU_1154	0.0576612	-0.204932	1.17367	-0.174608	0.861388	RO	NS			OTU_0594	0.0675301	-0.0304077	1.17638	-0.0258485	0.979378	RS	NS
OTU_1156	0.579305	-0.322855	0.306481	-1.05343	0.292145	RO	NS			OTU_0596	0.0231476	-0.0974313	1.17642	-0.0828202	0.933994	RS	NS
OTU_1157	0.0387336	-0.320011	1.17373	-0.272645	0.785126	RO	NS			OTU_0597	0.0229764	-0.0903339	1.17646	-0.0767845	0.938795	RS	NS
OTU_1159	0.0105906	-0.211622	1.17426	-0.180218	0.856981	RO	NS			OTU_0599	0.0184129	-0.0903339	1.17646	-0.0767845	0.938795	RS	NS
OTU_1160	0.02357	-0.293329	1.17391	-0.249873	0.802686	RO	NS			OTU_0600	12.9568	0.0210166	0.0955723	0.219903	0.825947	RS	NS
OTU_1161	0.608897	0.467068	0.665284	0.702057	0.482643	RO	NS			OTU_0601	0.446474	0.355198	0.440518	0.806318	0.42006	RS	NS
OTU_1163	0.0586523	-0.25297	1.17358	-0.215554	0.829336	RO	NS			OTU_0602	3.57081	0.101503	0.135543	0.748862	0.453941	RS	NS
OTU_1164	0.30976	0.0633124	0.78877	0.0802673	0.936025	RO	NS			OTU_0603	1.16774	0.770552	0.313243	2.45992	0.0138969	RS	NS
OTU_1165	0.0127293	-0.211622	1.17426	-0.180218	0.856981	RO	NS			OTU_0604	4.59638	0.227449	0.261754	0.868941	0.384879	RS	NS
OTU_1170	0.00785547	-0.209831	1.17425	-0.178693	0.858179	RO	NS			OTU_0605	0.68801	-0.614175	0.490051	-1.25329	0.210101	RS	NS
OTU_1178	0.217503	-0.219665	1.0701	-0.205275	0.837358	RO	NS			OTU_0606	0.1867	-0.242041	0.631772	-0.383115	0.701634	RS	NS
OTU_1179	1.86729	-0.822003	0.46356	-1.77324	0.0761892	RO	NS			OTU_0608	19.5288	-0.0747836	0.13157	-0.568396	0.569766	RS	NS
OTU_1180	0.218092	-0.142468	0.593831	-0.239914	0.810397	RO	NS			OTU_0609	0.418318	0.055721	0.546399	0.101979	0.918774	RS	NS
OTU_1181	8.02918	-0.34002	0.283837	-1.19794	0.230939	RO	NS			OTU_0610	38.4348	0.457301	0.226847	2.0159	0.0438104	RS	NS
OTU_1182	0.0823994	-0.38872	1.17308	-0.331369	0.740366	RO	NS			OTU_0611	0.192265	-0.0418852	0.636711	-0.0657836	0.94755	RS	NS
OTU_1183	0.0236419	-0.31938	1.17381	-0.272089	0.785554	RO	NS			OTU_0612	0.240747	-0.281885	0.685164	-0.411412	0.680771	RS	NS
OTU_1184	0.0614851	-0.254723	1.1742	-0.216932	0.828261	RO	NS			OTU_0613	0.178708	-0.0514379	0.694059	-0.0741117	0.940922	RS	NS
OTU_1185	0.442879	-0.165753	0.592023	-0.279978	0.779495	RO	NS			OTU_0614	0.135885	0.232796	0.97021	0.239944	0.810374	RS	NS
OTU_1186	1.18638	0.297388	0.634418	0.468757	0.639244	RO	NS			OTU_0615	0.0320047	0.13603	1.17629	0.115643	0.907936	RS	NS
OTU_1187	0.0291245	-0.211622	1.17426	-0.180218	0.856981	RO	NS			OTU_0618	1.29604	-0.49106	0.593013	-0.828077	0.407627	RS	NS
OTU_1188	0.094636	-0.143164	1.17372	-0.121975	0.902919	RO	NS			OTU_0619	20.6826	-0.356831	0.513319	-0.695144	0.486965	RS	NS
OTU_1190	0.406702	0.0641464	0.547557	0.11715	0.906741	RO	NS			OTU_0621	2.8	-0.150935	0.146665	-1.02911	0.303426	RS	NS
OTU_1191	7.99473	0.958617	0.276948	3.46136	0.00053745	RO	NS			OTU_0623	1.46644	-0.153692	0.219123	-0.701398	0.483055	RS	NS
OTU_1192	0.114254	0.0849017	1.17358	0.0723442	0.942328	RO	NS			OTU_0624	1.50081	-0.0392509	0.211796	-0.185324	0.852975	RS	NS
OTU_1194	0.16469	-0.392784	0.672051	-0.584455	0.558914	RO	NS			OTU_0625	0.693509	-0.26118	0.756728	-0.345143	0.729987	RS	NS
OTU_1195	0.200512	-0.423244	0.787805	-0.537245	0.591099	RO	NS			OTU_0626	1.30751	0.00306912	0.294775	0.0104118	0.991693	RS	NS
OTU_1198	0.02005	-0.251622	1.17408	-0.214313	0.830303	RO	NS			OTU_0627	0.650743	-0.316273	0.506633	-0.624265	0.532453	RS	NS
OTU_1205	0.0487321	-0.0382274	1.17433	-0.0325526	0.974031	RO	NS			OTU_0629	0.442215	-0.244888	0.37236	-0.657666	0.510753	RS	NS
OTU_1206	0.0263508	-0.312158	1.17378	-0.265942	0.790284	RO	NS			OTU_0630	5.7786	0.262138	0.40195	0.652166	0.514294	RS	NS
OTU_1211	21.3246	0.738922	0.214214	3.44945	0.000561728	RO	NS			OTU_0631	0.317697	0.604195	1.06965	0.564851	0.572175	RS	NS
OTU_1212	32.6519	-0.26075	0.273877	-0.952069	0.341062	RO	NS			OTU_0632	0.269003	-0.0236855	0.699405	-0.0338652	0.972985	RS	NS
OTU_1213	6.02659	0.109328	0.256513	0.426208	0.669956	RO	NS			OTU_0633	0.279309	-0.0328864	0.468167	-0.0702451	0.943999	RS	NS
OTU_1214	0.0712099	-0.0468802	1.17405	-0.0399302	0.968149	RO	NS			OTU_0634	0.225508	0.119933	0.860303	0.139407	0.889128	RS	NS
OTU_1215	0.0544973	-0.211622	1.17426	-0.180218	0.856981	RO	NS			OTU_0635	0.107305	-0.135657	1.17639	-0.115316	0.908195	RS	NS
OTU_1216	0.283602	0.352062	0.753031	0.467527	0.640123	RO	NS			OTU_0637	0.0169789	0.0590527	1.17635	0.0501998	0.959963	RS	NS
OTU_1217	0.0232506	-0.211622	1.17426	-0.180218	0.856981	RO	NS			OTU_0638	0.0570384	0.0560194	1.17631	0.047623	0.962017	RS	NS
OTU_1220	0.0751855	-0.155972	1.17441	-0.132809	0.894345	RO	NS			OTU_0640	0.0605994	-0.0453603	1.1764	-0.0385585	0.969242	RS	NS
OTU_1221	0.207354	-0.306582	1.17249	-0.261479	0.793723	RO	NS			OTU_0641	0.0536524	-0.105738	1.17647	-0.0898773	0.928385	RS	NS
OTU_1222	0.0114414	-0.107208	1.17448	-0.0912813	0.927269	RO	NS			OTU_0642	0.0200695	0.0286262	1.17638	0.0243342	0.980586	RS	NS
OTU_1224	0.426872	0.311759	0.402413	0.774723	0.438504	RO	NS			OTU_0643	0.37548	0.143206	0.395659	0.361942	0.717395	RS	NS
OTU_1225	0.1972	-0.360723	1.17346	-0.3074	0.758539	RO	NS			OTU_0644	3.75887	-0.0924171	0.148438	-0.622595	0.533551	RS	NS
OTU_1227	0.192324	-0.577232	0.626836	-0.920867	0.35712	RO	NS			OTU_0645	3.69482	0.149742	0.175761	0.851966	0.394233	RS	NS
OTU_1229	0.0321252	-0.178546	1.17421	-0.152057	0.879142	RO	NS			OTU_0646	5.3186	0.148772	0.142465	1.04427	0.296359	RS	NS
OTU_1230	0.00510015	-0.22104	1.17427	-0.188237	0.850691	RO	NS			OTU_0647	1.28773	0.238809	0.517643	0.461339	0.644555	RS	NS
OTU_1231	190.484	0.0360032	0.172453	0.208771	0.834627	RO	NS			OTU_0648	2.10219	-0.221426	0.340283	-0.650711	0.515233	RS	NS
OTU_1235	0.0117601	-0.362653	1.1739	-0.30893	0.757375	RO	NS			OTU_0649	2.13906	-0.0943174	0.332753	-0.283446	0.776835	RS	NS
OTU_1238	0.0248163	-0.254723	1.1742	-0.216932	0.828261	RO	NS			OTU_0650	0.912846	0.314737	0.380111	0.828013	0.407663	RS	NS
OTU_1241	0.00531275	-0.173263	1.17439	-0.147534	0.88271	RO	NS			OTU_0652	0.807527	0.381224	0.44808	0.850795	0.394883	RS	NS
OTU_1244	0.010994	-0.211622	1.17426	-0.180218	0.856981	RO	NS			OTU_0653	0.537357	0.228159	0.367494	0.620852	0.534697	RS	NS
OTU_1245	0.57301	0.261004	0.552635	0.47229	0.63672	RO	NS			OTU_0654	0.470856	-0.343627	0.391793	-0.877062	0.380453	RS	NS
OTU_1246	0.134723	-0.296192	0.88264	-0.335576	0.737191	RO	NS			OTU_0655	0.374321	0.192643	0.476974	0.403887	0.686296	RS	NS
OTU_1247	0.411186	0.15928	0.573473	0.277745	0.781208	RO	NS			OTU_0656	0.282113	-0.10141	0.701103	-0.144643	0.884993	RS	NS
OTU_1248	0.28252	0.206143	0.993177	0.207559	0.835573	RO	NS			OTU_0657	0.0309816	-0.121304	1.17624	-0.103128	0.917861	RS	NS
OTU_1249	39.5785	0.599945	0.208817	2.87307	0.00406509	RO	NS			OTU_0658	0.0340639	0.0111506	1.17636	0.00947894	0.992437	RS	NS
OTU_1251	30.6927	0.391824	0.246267	1.59105	0.111599	RO	NS			OTU_0659	0.0229764	-0.0903339	1.17646	-0.0767845	0.938795	RS	NS
OTU_1252	0.0388994	-0.101045	1.17407	-0.0860641	0.931415	RO	NS			OTU_0660	0.0218063	-0.135657	1.17639	-0.115316	0.908195	RS	NS
OTU_1253	2.4484	-0.45336	0.463454	-0.97822	0.327966	RO	NS			OTU_0661	0.0204375	-0.135657	1.17639	-0.115316	0.908195	RS	NS
OTU_1255	0.0190987	-0.195162	1.17423	-0.166204	0.867997	RO	NS			OTU_0662	0.021808	-0.0337081	1.17642	-0.0286532	0.977141	RS	NS
OTU_1256	3.42338	-0.707439	0.442365	-1.59922	0.109772	RO	NS			OTU_0663	0.0938282	0.0649111	1.00918	0.0643204	0.948715	RS	NS
OTU_1257	0.420378	-0.229105	0.523509	-0.437633	0.661652	RO	NS			OTU_0664	7.35361	-0.0956714	0.0907205	-1.05457	0.29162	RS	NS
OTU_1258	0.0134421	-0.195162	1.17423	-0.166204	0.867997	RO	NS			OTU_0665	1.32856	-0.368783	0.421548	-0.87483	0.381667	RS	NS
OTU_1260	0.0432647	-0.406334	1.17367	-0.346209	0.729186	RO	NS			OTU_0666	1.22679	-0.296023	0.409198	-0.723423	0.46942	RS	NS
OTU_1262	0.11571	0.0143396	1.17379	0.0122165	0.990253	RO	NS			OTU_0667	1.21692	0.176922	0.436709	0.405125	0.685386	RS	NS
OTU_1263	0.0305149	-0.249008	1.17395	-0.212111	0.83202	RO	NS			OTU_0668	1.61107	-0.248718	0.293977	-0.846044	0.397528	RS	NS
OTU_1264	0.274899	-0.33307	1.06277	-0.313399	0.753978	RO	NS			OTU_0669	0.534774	-0.0393322	0.607016	-0.064796	0.948336	RS	NS
OTU_1266	0.00658019	-0.292557	1.17409	-0.249177	0.803224	RO	NS			OTU_0670	0.454705	0.374476	0.569603	0.657433	0.510903	RS	NS
OTU_1267	0.188242	-0.494562	0.862577	-0.573354	0.566405	RO	NS			OTU_0672	38.3988	0.111025	0.216567	0.512659	0.60819	RS	NS
OTU_1269	0.0518688	-0.0338475	0.94179	-0.0359395	0.971331	RO	NS			OTU_0673	4.74191	0.112013	0.339579	0.329859	0.741507	RS	NS
OTU_1270	0.0286762	-0.326472	1.17374	-0.278147	0.780899	RO	NS			OTU_0674	1.50805	-0.07607	0.299436	-0.254044	0.799461	RS	NS
OTU_1274	0.0501391	-0.360724	1.17346	-0.307401	0.758538	RO	NS			OTU_0675	4.02014	-0.0699827	0.13341	-0.524568	0.599883	RS	NS
OTU_1276	0.0120394	-0.111354	1.17448	-0.0948117	0.924464	RO	NS			OTU_0676	0.429699	-0.0451604	0.44976	-0.10041	0.920019	RS	NS
OTU_1278	0.141309	0.0143458	0.977564	0.014675	0.988291	RO	NS			OTU_0677	0.40136	0.0162138	0.576338	0.0281325	0.977556	RS	NS
OTU_1279	0.0104204	-0.271624	1.17407	-0.231352	0.817041	RO	NS			OTU_0678	0.425427	-0.239992	0.507295	-0.473082	0.636155	RS	NS
OTU_1283	0.419949	-0.0454102	0.705755	-0.0643427	0.948697	RO	NS			OTU_0679	0.367774	-0.411715	0.588388	-0.699735	0.484093	RS	NS
OTU_1284	0.268388	-0.844204	1.1718	-0.720435	0.471257	RO	NS			OTU_0683	0.851851	-0.0883006	0.198631	-0.444545	0.656649	RS	NS
OTU_1285	24.5153	-0.283121	0.197038	-1.43688	0.150751	RO	NS			OTU_0684	5.43841	0.338867	0.21877	1.54896	0.121391	RS	NS
OTU_1286	0.244361	-0.538496	1.00784	-0.534305	0.593131	RO	NS			OTU_0685	0.447431	-0.610823	0.738309	-0.827327	0.408052	RS	NS
OTU_1288	0.143231	-0.266876	1.17411	-0.227301	0.82019	RO	NS			OTU_0686	0.458584	-0.480257	0.379478	-1.26557	0.205667	RS	NS
OTU_1289	0.911865	0.468657	0.532023	0.880897	0.378373	RO	NS			OTU_0687	3.22512	0.368891	0.270312	1.36468	0.172353	RS	NS
OTU_1292	0.0899527	-0.304339	1.15863	-0.262673	0.792803	RO	NS			OTU_0688	1.07326	0.0602705	0.553692	0.108852	0.91332	RS	NS
OTU_1293	0.0490858	-0.323761	1.17397	-0.275784	0.782714	RO	NS			OTU_0689	1.89635	0.279173	0.214148	1.30365	0.192354	RS	NS
OTU_1294	1.06436	0.620242	0.446951	1.38772	0.165223	RO	NS			OTU_0690	0.750683	-0.0367883	0.300603	-0.122382	0.902597	RS	NS
OTU_1295	0.0507936	-0.155972	1.17441	-0.132809	0.894345	RO	NS			OTU_0691	0.0661079	0.0734914	1.17633	0.0624753	0.950184	RS	NS
OTU_1296	0.729093	-1.19568	1.07503	-1.11223	0.266039	RO	NS			OTU_0692	0.0909867	-0.162416	1.17616	-0.13809	0.890169	RS	NS
OTU_1297	0.299712	-0.101365	0.857629	-0.118192	0.905916	RO	NS			OTU_0693	0.0464628	0.0560194	1.17631	0.047623	0.962017	RS	NS
OTU_1308	0.0802999	-0.318348	1.17387	-0.271195	0.786241	RO	NS			OTU_0694	0.0167992	-0.168816	1.17624	-0.143522	0.885878	RS	NS
OTU_1316	0.0126131	-0.211622	1.17426	-0.180218	0.856981	RO	NS			OTU_0695	0.0525697	-0.0898607	1.17624	-0.0763963	0.939104	RS	NS
OTU_1318	0.241311	-0.293414	0.831578	-0.35284	0.724208	RO	NS			OTU_0696	0.073145	0.0410621	1.17632	0.0349071	0.972154	RS	NS
OTU_1319	0.70316	-0.201678	0.480134	-0.420044	0.674453	RO	NS			OTU_0697	0.0795573	-0.105583	1.17624	-0.0897628	0.928476	RS	NS
OTU_1321	0.354115	-0.265784	0.598567	-0.444034	0.657018	RO	NS			OTU_0699	0.0790231	-0.119935	1.17639	-0.101952	0.918795	RS	NS
OTU_1322	0.569281	-0.248899	0.604932	-0.411449	0.680743	RO	NS			OTU_0701	0.0182606	-0.0974313	1.17642	-0.0828202	0.933994	RS	NS
OTU_1323	0.982386	0.0851076	0.494479	0.172116	0.863347	RO	NS			OTU_0702	0.016526	-0.0974313	1.17642	-0.0828202	0.933994	RS	NS
OTU_1324	0.0937019	-0.331539	1.17352	-0.282518	0.777546	RO	NS			OTU_0704	0.116882	0.116846	1.17616	0.0993451	0.920864	RS	NS
OTU_1325	0.00625826	-0.216198	1.17426	-0.184114	0.853924	RO	NS			OTU_0705	0.828439	0.556153	0.629063	0.884098	0.376643	RS	NS
OTU_1327	0.0293823	-0.282408	1.17413	-0.240525	0.809924	RO	NS			OTU_0706	3.57042	0.0404308	0.545101	0.0741713	0.940874	RS	NS
OTU_1328	1.43683	-0.106048	0.256023	-0.414211	0.678719	RO	NS			OTU_0707	0.758209	-0.272369	0.371916	-0.732338	0.463962	RS	NS
OTU_1329	0.283893	-0.0831515	0.855077	-0.0972445	0.922532	RO	NS			OTU_0708	0.128354	-0.0278371	1.17624	-0.0236662	0.981119	RS	NS
OTU_1333	0.0675328	-0.282408	1.17413	-0.240525	0.809924	RO	NS			OTU_0709	0.653367	-0.0760744	0.383762	-0.198233	0.842863	RS	NS
OTU_1334	0.0403263	-0.0968644	1.17406	-0.082504	0.934246	RO	NS			OTU_0710	0.207369	-0.182567	0.684653	-0.266656	0.789734	RS	NS
OTU_1344	0.0232506	-0.211622	1.17426	-0.180218	0.856981	RO	NS			OTU_0712	0.0534078	-0.0891225	1.17637	-0.0757606	0.93961	RS	NS
OTU_1346	0.112824	-0.206778	1.17422	-0.176098	0.860217	RO	NS			OTU_0713	0.105319	0.178483	1.1762	0.151746	0.879387	RS	NS
OTU_1347	0.00531275	-0.173263	1.17439	-0.147534	0.88271	RO	NS			OTU_0717	4.11674	0.167846	0.350959	0.478249	0.632473	RS	NS
OTU_1353	37.6548	-0.379274	0.166248	-2.28138	0.022526	RO	NS			OTU_0718	1.3863	0.216715	0.308902	0.701565	0.482951	RS	NS
OTU_1354	0.168223	-0.23606	1.17406	-0.201063	0.840649	RO	NS			OTU_0719	0.650858	-0.381271	0.391368	-0.974202	0.329956	RS	NS
OTU_1355	0.959569	0.726198	0.785455	0.924557	0.355196	RO	NS			OTU_0720	0.142949	-0.219467	0.765305	-0.28677	0.774288	RS	NS
OTU_1356	1.29498	-0.185904	0.367348	-0.50607	0.612808	RO	NS			OTU_0721	0.598489	-0.00358319	0.46802	-0.00765606	0.993891	RS	NS
OTU_1360	0.0465012	-0.178546	1.17421	-0.152057	0.879142	RO	NS			OTU_0722	0.252284	-0.205745	0.93857	-0.219211	0.826486	RS	NS
OTU_1361	0.653605	0.464404	0.798934	0.58128	0.561052	RO	NS			OTU_0723	0.221732	-0.133679	0.590863	-0.226243	0.821012	RS	NS
OTU_1362	0.490263	0.365055	0.957654	0.381197	0.703057	RO	NS			OTU_0724	0.315245	-0.385734	0.596023	-0.647179	0.517516	RS	NS
OTU_1363	0.0472975	-0.155972	1.17441	-0.132809	0.894345	RO	NS			OTU_0725	0.121522	-0.46013	1.17461	-0.391731	0.695257	RS	NS
OTU_1364	0.121226	-0.026562	0.889074	-0.029876	0.976166	RO	NS			OTU_0726	0.13863	0.0712446	0.769407	0.0925967	0.926224	RS	NS
OTU_1365	0.0272188	-0.310945	1.17379	-0.264908	0.79108	RO	NS			OTU_0727	0.0253707	-0.0903339	1.17646	-0.0767845	0.938795	RS	NS
OTU_1367	0.0572962	-0.0893983	1.17404	-0.0761459	0.939303	RO	NS			OTU_0729	0.0205193	-0.0337081	1.17642	-0.0286532	0.977141	RS	NS
OTU_1370	0.0967955	0.0441738	1.17371	0.0376361	0.969978	RO	NS			OTU_0730	0.0210222	-0.0974313	1.17642	-0.0828202	0.933994	RS	NS
OTU_1378	0.0154428	-0.282408	1.17413	-0.240525	0.809924	RO	NS			OTU_0731	52.6928	0.478234	0.200486	2.38537	0.0170618	RS	NS
OTU_1379	0.0239244	-0.350326	1.17376	-0.298466	0.765347	RO	NS			OTU_0732	0.99366	-0.0112217	0.266269	-0.0421444	0.966384	RS	NS
OTU_1380	0.0614851	-0.254723	1.1742	-0.216932	0.828261	RO	NS			OTU_0733	0.238777	0.16061	0.593718	0.270515	0.786764	RS	NS
OTU_1381	0.0216828	-0.293329	1.17391	-0.249873	0.802686	RO	NS			OTU_0734	1.76165	0.00815831	0.180285	0.0452523	0.963906	RS	NS
OTU_1383	11.88	-0.280466	0.22997	-1.21958	0.222626	RO	NS			OTU_0735	1.1479	-1.19927	0.715547	-1.67601	0.0937353	RS	NS
OTU_1384	1.46431	0.622323	0.522002	1.19218	0.233189	RO	NS			OTU_0736	2.0465	0.0882609	0.191474	0.460955	0.644831	RS	NS
OTU_1385	16.7134	-0.464318	0.366175	-1.26802	0.204789	RO	NS			OTU_0737	0.978661	-0.211269	0.312217	-0.676674	0.498613	RS	NS
OTU_1386	0.15901	-0.186015	1.15628	-0.160874	0.872193	RO	NS			OTU_0738	0.647537	0.269298	0.413725	0.650909	0.515105	RS	NS
OTU_1387	0.108995	-0.178546	1.17421	-0.152057	0.879142	RO	NS			OTU_0739	0.339323	0.210636	0.43331	0.48611	0.626889	RS	NS
OTU_1389	0.0531332	0.0660217	1.17434	0.05622	0.955167	RO	NS			OTU_0740	0.139829	-0.384007	1.12974	-0.339907	0.733926	RS	NS
OTU_1390	0.708581	-1.12391	0.808306	-1.39044	0.164394	RO	NS			OTU_0741	0.36468	0.216285	0.617422	0.350303	0.726111	RS	NS
OTU_1392	44.7741	0.369067	0.242924	1.51927	0.128695	RO	NS			OTU_0742	0.165874	-0.0268447	0.862889	-0.0311102	0.975182	RS	NS
OTU_1401	0.0127671	-0.277966	1.17402	-0.236764	0.81284	RO	NS			OTU_0743	0.131451	0.00263619	0.866155	0.00304355	0.997572	RS	NS
OTU_1408	0.0252263	-0.178546	1.17421	-0.152057	0.879142	RO	NS			OTU_0744	0.0565741	-0.105583	1.17624	-0.0897628	0.928476	RS	NS
OTU_1410	159.247	0.00780565	0.176502	0.0442241	0.964726	RO	NS			OTU_0745	0.102471	-0.0686372	1.01457	-0.0676518	0.946063	RS	NS
OTU_1411	0.212392	-0.0297447	1.17356	-0.0253456	0.979779	RO	NS			OTU_0746	0.170949	0.150109	0.771656	0.194529	0.845762	RS	NS
OTU_1412	3.59037	0.360223	0.290919	1.23822	0.215634	RO	NS			OTU_0747	0.0817624	-0.181679	1.17574	-0.154523	0.877197	RS	NS
OTU_1413	0.16739	-0.169153	0.885503	-0.191025	0.848506	RO	NS			OTU_0748	0.021808	-0.0337081	1.17642	-0.0286532	0.977141	RS	NS
OTU_1414	0.120632	-0.279966	0.816898	-0.342718	0.73181	RO	NS			OTU_0749	0.0500657	-0.27495	1.17575	-0.23385	0.815101	RS	NS
OTU_1416	0.24698	-0.107633	0.725376	-0.148383	0.882041	RO	NS			OTU_0750	0.0253707	-0.0903339	1.17646	-0.0767845	0.938795	RS	NS
OTU_1417	0.4243	0.41921	0.501466	0.835969	0.403172	RO	NS			OTU_0751	0.0150378	-0.00710444	1.17641	-0.00603908	0.995182	RS	NS
OTU_1418	0.0162947	-0.197525	1.17419	-0.168223	0.866408	RO	NS			OTU_0752	0.0247386	-0.0903339	1.17646	-0.0767845	0.938795	RS	NS
OTU_1419	5.41071	-0.449836	0.427375	-1.05256	0.292544	RO	NS			OTU_0753	3.94463	-0.025793	0.125737	-0.205135	0.837467	RS	NS
OTU_1420	0.0315728	-0.435801	1.17357	-0.371346	0.71038	RO	NS			OTU_0754	0.255821	0.225829	0.860715	0.262374	0.793033	RS	NS
OTU_1421	28.1098	0.283176	0.257629	1.09916	0.271697	RO	NS			OTU_0755	0.430703	0.383427	0.493143	0.777518	0.436853	RS	NS
OTU_1423	31.2101	0.0479483	0.182884	0.26218	0.793183	RO	NS			OTU_0756	0.0430303	-0.0187564	1.1764	-0.0159439	0.987279	RS	NS
OTU_1424	0.160151	-0.242216	0.874738	-0.276902	0.781856	RO	NS			OTU_0757	0.400325	-0.342104	0.468199	-0.730681	0.464974	RS	NS
OTU_1439	0.0107799	-0.211622	1.17426	-0.180218	0.856981	RO	NS			OTU_0758	0.0865663	0.0235902	1.17631	0.0200545	0.984	RS	NS
OTU_1441	51.4921	0.207932	0.193548	1.07432	0.282679	RO	NS			OTU_0759	0.0821805	0.293135	1.17604	0.249257	0.803162	RS	NS
OTU_1442	3.03543	-0.229831	0.447508	-0.513579	0.607546	RO	NS			OTU_0760	0.0167992	-0.168816	1.17624	-0.143522	0.885878	RS	NS
OTU_1443	0.164387	0.268184	1.01644	0.263848	0.791897	RO	NS			OTU_0761	0.0204406	-0.0974313	1.17642	-0.0828202	0.933994	RS	NS
OTU_1444	1.12683	-0.495172	0.624303	-0.793159	0.427685	RO	NS			OTU_0762	0.0146017	-0.242063	1.17605	-0.205827	0.836926	RS	NS
OTU_1445	0.167999	-0.090774	0.985839	-0.0920779	0.926636	RO	NS			OTU_0763	0.0242574	-0.168816	1.17624	-0.143522	0.885878	RS	NS
OTU_1446	0.0503307	-0.282408	1.17413	-0.240525	0.809924	RO	NS			OTU_0764	11.0653	1.8085	0.734451	2.46238	0.0138019	RS	NS
OTU_1448	0.0457587	-0.470187	1.17341	-0.400703	0.688639	RO	NS			OTU_0765	190.805	0.195206	0.118076	1.65322	0.0982861	RS	NS
OTU_1449	1.26764	0.389253	0.599975	0.648781	0.51648	RO	NS			OTU_0767	2.10202	-0.0891754	0.249025	-0.358099	0.72027	RS	NS
OTU_1451	0.09225	-0.500193	1.17318	-0.426358	0.669847	RO	NS			OTU_0768	0.0745473	0.20433	1.17615	0.173728	0.862079	RS	NS
OTU_1453	0.0608768	-0.383869	1.17331	-0.327168	0.743541	RO	NS			OTU_0769	0.333724	-0.198077	0.460883	-0.429778	0.667357	RS	NS
OTU_1460	0.0295121	-0.32309	1.17374	-0.275266	0.783112	RO	NS			OTU_0770	36.4018	-0.00617354	0.183142	-0.033709	0.973109	RS	NS
OTU_1466	1.42456	-0.875311	0.746459	-1.17262	0.240949	RO	NS			OTU_0773	0.216025	-0.168047	0.848982	-0.197939	0.843093	RS	NS
OTU_1467	4.50245	-0.137692	0.225526	-0.610538	0.541506	RO	NS			OTU_0774	0.0772654	-0.00335731	1.17626	-0.00285423	0.997723	RS	NS
OTU_1468	0.773821	-0.328366	0.723595	-0.453798	0.649974	RO	NS			OTU_0775	0.0462952	-0.121304	1.17624	-0.103128	0.917861	RS	NS
OTU_1469	0.442354	-0.0713989	0.571254	-0.124986	0.900534	RO	NS			OTU_0776	0.0399124	-0.0603118	1.17642	-0.0512671	0.959113	RS	NS
OTU_1470	0.0165416	-0.0923543	1.17445	-0.0786362	0.937322	RO	NS			OTU_0777	0.0365212	-0.121304	1.17624	-0.103128	0.917861	RS	NS
OTU_1471	1.43355	0.0877267	0.27719	0.316486	0.751634	RO	NS			OTU_0778	0.0210222	-0.0974313	1.17642	-0.0828202	0.933994	RS	NS
OTU_1472	0.848986	-0.120377	0.734485	-0.163894	0.869815	RO	NS			OTU_0780	1.07516	0.0408125	0.47941	0.0851307	0.932158	RS	NS
OTU_1473	0.031971	-0.284924	1.17377	-0.242743	0.808204	RO	NS			OTU_0781	0.424763	-0.0318548	0.501214	-0.0635554	0.949324	RS	NS
OTU_1474	0.33808	0.0121377	0.897781	0.0135197	0.989213	RO	NS			OTU_0782	0.484174	0.0377425	0.420509	0.0897545	0.928482	RS	NS
OTU_1475	0.0407745	-0.155972	1.17441	-0.132809	0.894345	RO	NS			OTU_0783	0.0643697	0.221875	1.17616	0.188644	0.850372	RS	NS
OTU_1476	1.00915	0.0511833	0.696054	0.0735335	0.941382	RO	NS			OTU_0784	0.111443	-0.270075	0.992158	-0.272209	0.785461	RS	NS
OTU_1479	6.66813	-0.866188	0.431084	-2.00933	0.0445027	RO	NS			OTU_0786	0.107878	-0.0213094	1.1302	-0.0188546	0.984957	RS	NS
OTU_1480	0.0619141	-0.0668722	1.17455	-0.0569343	0.954597	RO	NS			OTU_0787	0.060908	0.0169757	1.17637	0.0144306	0.988486	RS	NS
OTU_1482	0.200655	-0.494878	1.17339	-0.421752	0.673206	RO	NS			OTU_0788	0.051967	0.0111506	1.17636	0.00947894	0.992437	RS	NS
OTU_1483	0.011785	-0.266877	1.17411	-0.227301	0.82019	RO	NS			OTU_0789	0.0160911	-0.0486587	1.17644	-0.0413611	0.967008	RS	NS
OTU_1487	0.0463004	-0.0594175	1.17419	-0.050603	0.959642	RO	NS			OTU_0790	0.0173223	-0.0486587	1.17644	-0.0413611	0.967008	RS	NS
OTU_1490	0.0723265	-0.280095	1.17401	-0.23858	0.811431	RO	NS			OTU_0791	0.0205193	-0.0337081	1.17642	-0.0286532	0.977141	RS	NS
OTU_1491	0.0507936	-0.155972	1.17441	-0.132809	0.894345	RO	NS			OTU_0792	0.0191921	-0.0903339	1.17646	-0.0767845	0.938795	RS	NS
OTU_1493	0.0348278	-0.076172	1.17421	-0.0648711	0.948277	RO	NS			OTU_0793	0.995519	0.231438	0.418039	0.553629	0.579833	RS	NS
OTU_1495	0.0396523	-0.471784	1.17346	-0.402047	0.68765	RO	NS			OTU_0794	4.0126	0.748112	0.300985	2.48554	0.0129354	RS	NS
OTU_1499	0.249846	-0.0611692	0.526858	-0.116102	0.907572	RO	NS			OTU_0795	0.985833	-0.0893915	0.2188	-0.408554	0.682867	RS	NS
OTU_1504	0.0104204	-0.271624	1.17407	-0.231352	0.817041	RO	NS			OTU_0796	0.242618	-0.0682168	1.09806	-0.0621251	0.950463	RS	NS
OTU_1507	0.521239	-0.706638	0.556401	-1.27001	0.204079	RO	NS			OTU_0797	0.054405	-0.105583	1.17624	-0.0897628	0.928476	RS	NS
OTU_1508	1.56804	0.0741674	0.279393	0.265459	0.790656	RO	NS			OTU_0798	0.0302562	0.134307	1.1763	0.114178	0.909097	RS	NS
OTU_1509	1.46088	-0.371695	1.17338	-0.316773	0.751416	RO	NS			OTU_0799	4.11701	-0.0872422	0.216027	-0.403849	0.686324	RS	NS
OTU_1510	0.0334157	0.0586987	1.17458	0.0499744	0.960143	RO	NS			OTU_0800	0.631671	0.371972	0.521535	0.713225	0.475707	RS	NS
OTU_1511	0.601817	-0.227842	0.609325	-0.373925	0.70846	RO	NS			OTU_0801	0.440145	-0.253866	0.691904	-0.366909	0.713687	RS	NS
OTU_1512	0.355252	0.128072	0.639706	0.200204	0.841321	RO	NS			OTU_0802	0.103202	0.10464	0.990121	0.105684	0.915833	RS	NS
OTU_1513	2.75357	0.5563	0.389989	1.42645	0.153739	RO	NS			OTU_0803	0.0397846	-0.0666175	1.1764	-0.0566282	0.954841	RS	NS
OTU_1514	0.656762	0.144199	0.569349	0.253271	0.800059	RO	NS			OTU_0804	0.0302562	0.134307	1.1763	0.114178	0.909097	RS	NS
OTU_1516	2.98665	-0.623077	0.404567	-1.54011	0.123534	RO	NS			OTU_0805	0.0153285	0.04824	1.17636	0.0410078	0.96729	RS	NS
OTU_1519	0.776897	0.566139	0.531731	1.06471	0.287007	RO	NS			OTU_0806	0.0412617	-0.197498	1.176	-0.16794	0.866631	RS	NS
OTU_1520	0.0138301	-0.186229	1.17422	-0.158598	0.873985	RO	NS			OTU_0807	0.0205193	-0.0337081	1.17642	-0.0286532	0.977141	RS	NS
OTU_1521	0.0727838	-0.474907	1.17314	-0.404817	0.685612	RO	NS			OTU_0808	0.0182606	-0.0974313	1.17642	-0.0828202	0.933994	RS	NS
OTU_1522	7.43697	0.00599352	0.293784	0.0204011	0.983723	RO	NS			OTU_0809	0.0200695	0.0286262	1.17638	0.0243342	0.980586	RS	NS
OTU_1525	0.0105906	-0.211622	1.17426	-0.180218	0.856981	RO	NS			OTU_0810	4.6744	0.0679157	0.137059	0.495521	0.620233	RS	NS
OTU_1526	0.0223666	-0.389915	1.17372	-0.332203	0.739736	RO	NS			OTU_0811	2.28002	0.127421	0.276323	0.46113	0.644706	RS	NS
OTU_1529	0.148951	-0.690137	1.17265	-0.588526	0.556179	RO	NS			OTU_0812	9.01309	0.0624908	0.0954752	0.654524	0.512774	RS	NS
OTU_1530	0.0675328	-0.282408	1.17413	-0.240525	0.809924	RO	NS			OTU_0813	1.01474	0.564637	0.350981	1.60874	0.107673	RS	NS
OTU_1531	0.0879152	-0.421044	1.1645	-0.361566	0.717676	RO	NS			OTU_0814	0.308084	-0.0318519	0.774182	-0.0411426	0.967182	RS	NS
OTU_1533	0.0544973	-0.211622	1.17426	-0.180218	0.856981	RO	NS			OTU_0815	0.864029	0.280253	0.422047	0.664032	0.50667	RS	NS
OTU_1538	0.0368736	-0.0695624	1.17439	-0.0592328	0.952767	RO	NS			OTU_0816	0.749737	0.0986078	0.360021	0.273894	0.784166	RS	NS
OTU_1545	0.458338	-0.307936	0.62317	-0.494145	0.621204	RO	NS			OTU_0817	0.480315	-0.224108	0.34858	-0.642917	0.520278	RS	NS
OTU_1546	0.00785547	-0.209831	1.17425	-0.178693	0.858179	RO	NS			OTU_0818	0.447193	-0.531905	0.606344	-0.877233	0.38036	RS	NS
OTU_1548	0.196862	-0.516098	1.16282	-0.443835	0.657162	RO	NS			OTU_0819	0.349687	-0.592694	0.420783	-1.40855	0.158968	RS	NS
OTU_1549	4.18657	0.681814	0.306324	2.22579	0.026028	RO	NS			OTU_0820	0.215742	-0.216263	0.54222	-0.398848	0.690005	RS	NS
OTU_1550	0.0568377	-0.142921	1.17372	-0.121768	0.903083	RO	NS			OTU_0821	0.123098	-0.29153	0.976632	-0.298505	0.765318	RS	NS
OTU_1551	0.145484	0.0164682	0.993053	0.0165834	0.986769	RO	NS			OTU_0822	0.0485148	-0.27495	1.17575	-0.23385	0.815101	RS	NS
OTU_1552	0.204337	-0.478617	0.737594	-0.64889	0.51641	RO	NS			OTU_0823	0.0543893	-0.10453	1.17638	-0.088857	0.929196	RS	NS
OTU_1553	0.114093	-0.434954	1.1734	-0.370678	0.710877	RO	NS			OTU_0825	3.22462	1.15605	0.662562	1.74482	0.0810168	RS	NS
OTU_1554	0.0390612	0.0906515	1.17455	0.07718	0.93848	RO	NS			OTU_0826	1.86992	-0.214866	0.422446	-0.508623	0.611016	RS	NS
OTU_1555	0.0207969	-0.323761	1.17397	-0.275784	0.782714	RO	NS			OTU_0827	0.856228	-0.10958	0.285632	-0.383638	0.701247	RS	NS
OTU_1557	0.0120394	-0.111354	1.17448	-0.0948117	0.924464	RO	NS			OTU_0828	0.22769	0.204372	0.83945	0.24346	0.807649	RS	NS
OTU_1558	0.857699	-0.0920497	0.648984	-0.141837	0.887209	RO	NS			OTU_0829	0.342726	0.320275	0.484703	0.660765	0.508763	RS	NS
OTU_1561	0.0127671	-0.277966	1.17402	-0.236764	0.81284	RO	NS			OTU_0830	0.0209811	-0.00710444	1.17641	-0.00603908	0.995182	RS	NS
OTU_1562	0.159839	-0.328966	0.817028	-0.402638	0.687215	RO	NS			OTU_0831	0.126594	0.0447232	0.873033	0.0512274	0.959144	RS	NS
OTU_1564	0.173806	-0.0090639	0.86876	-0.0104331	0.991676	RO	NS			OTU_0833	0.0855326	0.0676615	1.16837	0.0579109	0.95382	RS	NS
OTU_1566	0.141896	-0.310008	1.17348	-0.264178	0.791643	RO	NS			OTU_0834	0.0500234	-0.0903339	1.17646	-0.0767845	0.938795	RS	NS
OTU_1567	0.0208409	-0.299042	1.17387	-0.254748	0.798918	RO	NS			OTU_0835	0.041622	-0.10453	1.17638	-0.088857	0.929196	RS	NS
OTU_1568	0.0881469	-0.365122	1.17381	-0.311057	0.755757	RO	NS			OTU_0836	0.0146017	-0.242063	1.17605	-0.205827	0.836926	RS	NS
OTU_1572	0.0374753	-0.269651	1.17378	-0.229729	0.818302	RO	NS			OTU_0837	0.0424675	-0.128336	1.17632	-0.1091	0.913123	RS	NS
OTU_1575	0.0173237	-0.280095	1.17401	-0.23858	0.811431	RO	NS			OTU_0839	0.0205193	-0.0337081	1.17642	-0.0286532	0.977141	RS	NS
OTU_1578	0.214522	-0.329797	0.919857	-0.358531	0.719946	RO	NS			OTU_0840	0.0230011	-0.168816	1.17624	-0.143522	0.885878	RS	NS
OTU_1579	5.48788	-0.635709	0.355796	-1.78672	0.0739823	RO	NS			OTU_0841	0.0161604	-0.0486587	1.17644	-0.0413611	0.967008	RS	NS
OTU_1580	0.271139	0.325549	1.17393	0.277314	0.781539	RO	NS			OTU_0842	0.0161604	-0.0486587	1.17644	-0.0413611	0.967008	RS	NS
OTU_1581	0.260996	-0.537809	0.743226	-0.723615	0.469302	RO	NS			OTU_0844	3.01216	0.184153	0.290023	0.634962	0.525453	RS	NS
OTU_1582	0.0134421	-0.195162	1.17423	-0.166204	0.867997	RO	NS			OTU_0845	4.62375	0.0603375	0.182759	0.330148	0.741288	RS	NS
OTU_1584	0.0496326	-0.266876	1.17411	-0.227301	0.82019	RO	NS			OTU_0846	3.37289	-0.197389	0.167146	-1.18094	0.237628	RS	NS
OTU_1585	0.0236488	-0.200194	1.17435	-0.170472	0.864639	RO	NS			OTU_0847	2.96415	0.223696	0.233372	0.958541	0.33779	RS	NS
OTU_1586	0.132174	-0.342353	1.17268	-0.29194	0.770332	RO	NS			OTU_0848	3.18932	0.774219	0.301888	2.56459	0.0103298	RS	NS
OTU_1587	0.0465012	-0.178546	1.17421	-0.152057	0.879142	RO	NS			OTU_0849	1.11478	0.01182	0.26175	0.0451575	0.963982	RS	NS
OTU_1592	0.0170161	-0.173847	1.1742	-0.148056	0.882299	RO	NS			OTU_0850	0.764022	-0.126265	0.451481	-0.279668	0.779732	RS	NS
OTU_1593	0.0291245	-0.211622	1.17426	-0.180218	0.856981	RO	NS			OTU_0851	0.620548	0.0290927	0.383176	0.075925	0.939479	RS	NS
OTU_1598	0.0268842	-0.144975	1.17416	-0.123472	0.901734	RO	NS			OTU_0852	0.552176	-0.201737	0.397963	-0.506924	0.612208	RS	NS
OTU_1600	0.0134421	-0.195162	1.17423	-0.166204	0.867997	RO	NS			OTU_0853	0.458027	-0.0299987	0.391656	-0.0765945	0.938946	RS	NS
OTU_1602	4.28926	-0.223682	0.352963	-0.633727	0.526259	RO	NS			OTU_0854	0.144362	-0.518538	1.17451	-0.441492	0.658857	RS	NS
OTU_1603	0.0396523	-0.471784	1.17346	-0.402047	0.68765	RO	NS			OTU_0855	0.172758	-0.404227	1.17436	-0.344209	0.730689	RS	NS
OTU_1604	1.24892	0.358842	0.359256	0.998848	0.317868	RO	NS			OTU_0856	0.186509	0.238104	1.08575	0.219299	0.826417	RS	NS
OTU_1605	0.0789918	-0.333456	1.17024	-0.284947	0.775685	RO	NS			OTU_0857	0.0760113	-0.0154539	1.17636	-0.013137	0.989518	RS	NS
OTU_1606	0.0315317	-0.155972	1.17441	-0.132809	0.894345	RO	NS			OTU_0858	0.037324	-0.183884	1.1761	-0.156351	0.875756	RS	NS
OTU_1607	0.1175	0.0253752	1.16403	0.0217994	0.982608	RO	NS			OTU_0859	0.0169789	0.0590527	1.17635	0.0501998	0.959963	RS	NS
OTU_1608	0.0236488	-0.200194	1.17435	-0.170472	0.864639	RO	NS			OTU_0860	907.262	0.0471965	0.0844468	0.55889	0.576236	RS	NS
OTU_1609	0.497791	-0.413317	0.68186	-0.606162	0.544407	RO	NS			OTU_0862	0.0196536	0.0286262	1.17638	0.0243342	0.980586	RS	NS
OTU_1610	1.4327	-1.03618	0.563274	-1.83957	0.0658315	RO	NS			OTU_0863	27.2315	-0.48028	0.271338	-1.77004	0.0767203	RS	NS
OTU_1611	0.581254	-0.0828465	0.539407	-0.153588	0.877935	RO	NS			OTU_0864	1.17448	-0.556908	0.927593	-0.60038	0.548253	RS	NS
OTU_1612	0.121727	0.367524	1.17389	0.313082	0.754219	RO	NS			OTU_0865	1.15888	0.510297	0.860978	0.592695	0.553386	RS	NS
OTU_1614	0.0190987	-0.195162	1.17423	-0.166204	0.867997	RO	NS			OTU_0866	1.62682	-0.435471	0.26426	-1.64789	0.0993759	RS	NS
OTU_1618	0.0490858	-0.323761	1.17397	-0.275784	0.782714	RO	NS			OTU_0867	0.899893	0.0959349	0.347139	0.276359	0.782273	RS	NS
OTU_1619	0.016713	-0.280095	1.17401	-0.23858	0.811431	RO	NS			OTU_0868	103.606	-0.157071	0.161377	-0.973322	0.330394	RS	NS
OTU_1628	6.63917	-0.408484	0.28488	-1.43388	0.151607	RO	NS			OTU_0869	0.838485	-0.0362168	0.310454	-0.116657	0.907132	RS	NS
OTU_1629	4.07258	0.736292	0.308734	2.38487	0.0170851	RO	NS			OTU_0870	0.978472	-0.299643	0.278803	-1.07475	0.282487	RS	NS
OTU_1630	4.26909	-0.27287	0.411979	-0.662339	0.507754	RO	NS			OTU_0871	0.586065	0.359247	0.395188	0.909054	0.363322	RS	NS
OTU_1631	4.29718	-0.476766	0.430827	-1.10663	0.268454	RO	NS			OTU_0872	0.185622	0.0950666	0.628176	0.151338	0.879709	RS	NS
OTU_1632	0.879757	0.42117	0.569848	0.739092	0.459851	RO	NS			OTU_0874	0.237365	0.053578	0.765929	0.0699516	0.944232	RS	NS
OTU_1633	17.7646	-0.227203	0.181632	-1.2509	0.210972	RO	NS			OTU_0875	0.148286	-0.246893	0.972827	-0.253789	0.799658	RS	NS
OTU_1634	1.55199	0.114903	0.305913	0.375605	0.70721	RO	NS			OTU_0876	0.0571831	-0.140651	1.17607	-0.119594	0.904805	RS	NS
OTU_1635	0.381006	-0.377137	1.17362	-0.321346	0.747948	RO	NS			OTU_0877	0.0428013	0.0111506	1.17636	0.00947894	0.992437	RS	NS
OTU_1637	1.47259	-0.593077	0.321061	-1.84724	0.0647123	RO	NS			OTU_0878	0.126971	-0.012832	0.978988	-0.0131074	0.989542	RS	NS
OTU_1638	0.0581897	-0.0474413	1.17396	-0.0404114	0.967765	RO	NS			OTU_0879	0.0909919	-0.156373	1.17607	-0.132962	0.894224	RS	NS
OTU_1642	0.111794	-0.162025	1.17418	-0.137989	0.890249	RO	NS			OTU_0881	0.0548927	-0.00380345	1.17638	-0.00323319	0.99742	RS	NS
OTU_1643	0.0207969	-0.323761	1.17397	-0.275784	0.782714	RO	NS			OTU_0882	0.0620389	-0.130975	1.17615	-0.111359	0.911332	RS	NS
OTU_1645	0.330136	-0.430384	1.17343	-0.366776	0.713786	RO	NS			OTU_0883	0.0169789	0.0590527	1.17635	0.0501998	0.959963	RS	NS
OTU_1646	0.011785	-0.266877	1.17411	-0.227301	0.82019	RO	NS			OTU_0884	0.0162066	-0.168816	1.17624	-0.143522	0.885878	RS	NS
OTU_1648	0.0316897	-0.254723	1.1742	-0.216932	0.828261	RO	NS			OTU_0885	81.2526	-0.0979651	0.0549993	-1.7812	0.0748791	RS	NS
OTU_1649	0.102265	0.00216968	1.15276	0.00188217	0.998498	RO	NS			OTU_0886	9.50435	-0.0182398	0.108709	-0.167786	0.866752	RS	NS
OTU_1650	0.0107799	-0.211622	1.17426	-0.180218	0.856981	RO	NS			OTU_0887	7.57373	-0.0867546	0.0908681	-0.954731	0.339714	RS	NS
OTU_1665	1.61232	0.106423	0.392678	0.271019	0.786377	RO	NS			OTU_0888	6.29899	0.0502759	0.0938986	0.535428	0.592354	RS	NS
OTU_1666	21.3992	-0.566331	0.2832	-1.99975	0.0455271	RO	NS			OTU_0889	4.80992	-0.0975198	0.105293	-0.926173	0.354356	RS	NS
OTU_1667	2.71452	-0.219752	0.836109	-0.262828	0.792683	RO	NS			OTU_0890	1.41325	0.028958	0.185756	0.155893	0.876118	RS	NS
OTU_1668	3.95085	0.722668	0.661131	1.09308	0.274359	RO	NS			OTU_0891	0.44249	0.0483135	0.454275	0.106353	0.915302	RS	NS
OTU_1669	0.914883	-0.260601	0.402908	-0.646801	0.517761	RO	NS			OTU_0892	0.518879	0.28559	0.348106	0.820409	0.411983	RS	NS
OTU_1670	0.245941	-0.293329	1.17391	-0.249873	0.802686	RO	NS			OTU_0893	0.290542	0.100292	0.517215	0.193908	0.846248	RS	NS
OTU_1672	10.5816	-0.426707	0.242413	-1.76025	0.0783659	RO	NS			OTU_0894	0.542183	0.279698	0.418446	0.66842	0.503865	RS	NS
OTU_1673	0.0232506	-0.211622	1.17426	-0.180218	0.856981	RO	NS			OTU_0895	0.390025	0.33944	0.411705	0.824473	0.409671	RS	NS
OTU_1674	0.0120152	-0.193142	1.17423	-0.164484	0.86935	RO	NS			OTU_0896	0.217988	-0.2222	0.582176	-0.381672	0.702705	RS	NS
OTU_1675	1.90431	0.282516	0.683128	0.413562	0.679195	RO	NS			OTU_0897	0.255642	-0.128369	0.514617	-0.249445	0.803016	RS	NS
OTU_1676	0.0287898	-0.200194	1.17435	-0.170472	0.864639	RO	NS			OTU_0899	0.200379	-0.174978	0.848216	-0.20629	0.836565	RS	NS
OTU_1678	0.121663	-0.438033	0.89289	-0.490579	0.623725	RO	NS			OTU_0900	0.090912	-0.109203	1.17607	-0.092854	0.92602	RS	NS
OTU_1681	0.393755	-0.127301	0.770206	-0.165281	0.868723	RO	NS			OTU_0901	0.106786	-0.0680943	1.14003	-0.05973	0.952371	RS	NS
OTU_1682	0.0500126	-0.320011	1.17373	-0.272645	0.785126	RO	NS			OTU_0902	0.104228	-0.0556111	1.14166	-0.0487109	0.96115	RS	NS
OTU_1683	0.0358001	-0.293329	1.17391	-0.249873	0.802686	RO	NS			OTU_0903	0.090085	-0.304492	1.1752	-0.259097	0.79556	RS	NS
OTU_1684	0.0507497	-0.360724	1.17346	-0.307401	0.758538	RO	NS			OTU_0904	0.0881504	-0.312086	1.01896	-0.30628	0.759392	RS	NS
OTU_1685	0.100749	-0.355369	1.00449	-0.35378	0.723504	RO	NS			OTU_0905	0.0372971	-0.162416	1.17616	-0.13809	0.890169	RS	NS
OTU_1692	0.0144523	-0.280095	1.17401	-0.23858	0.811431	RO	NS			OTU_0906	0.0207523	-0.0903339	1.17646	-0.0767845	0.938795	RS	NS
OTU_1695	1.29359	-0.142208	0.45531	-0.312333	0.754788	RO	NS			OTU_0907	0.0153285	0.04824	1.17636	0.0410078	0.96729	RS	NS
OTU_1696	1.22378	0.132693	0.837024	0.15853	0.874039	RO	NS			OTU_0908	0.0143192	-0.168816	1.17624	-0.143522	0.885878	RS	NS
OTU_1697	12.4818	-0.0628286	0.287724	-0.218364	0.827145	RO	NS			OTU_0909	0.015985	-0.0903339	1.17646	-0.0767845	0.938795	RS	NS
OTU_1698	25.2048	-1.02237	0.590553	-1.73122	0.0834131	RO	NS			OTU_0910	0.0647818	-0.228032	1.17577	-0.193943	0.846221	RS	NS
OTU_1700	1.09712	-0.185127	0.426475	-0.434086	0.664226	RO	NS			OTU_0911	6.52781	-0.0781482	0.160603	-0.486592	0.626548	RS	NS
OTU_1701	4.99104	-0.391219	0.343269	-1.13968	0.254418	RO	NS			OTU_0912	7.1924	0.197875	0.207334	0.954377	0.339893	RS	NS
OTU_1702	0.0336469	-0.405442	1.17366	-0.345451	0.729755	RO	NS			OTU_0913	6.84818	0.108589	0.186347	0.582728	0.560076	RS	NS
OTU_1703	0.317276	-0.0384597	0.919516	-0.041826	0.966637	RO	NS			OTU_0914	1.71454	-0.200769	0.277055	-0.724652	0.468665	RS	NS
OTU_1704	0.757362	-0.687835	0.63213	-1.08812	0.276541	RO	NS			OTU_0915	2.23314	-0.65296	0.36322	-1.7977	0.0722245	RS	NS
OTU_1705	0.285035	-0.0893002	1.09472	-0.0815739	0.934986	RO	NS			OTU_0916	1.88918	-0.372294	0.595585	-0.62509	0.531912	RS	NS
OTU_1706	1.13396	-0.182112	0.831985	-0.218888	0.826737	RO	NS			OTU_0917	0.66862	-0.590956	0.430616	-1.37235	0.169955	RS	NS
OTU_1709	0.0418983	-0.479968	1.17343	-0.409029	0.682518	RO	NS			OTU_0918	0.173963	0.0865016	0.757644	0.114172	0.909102	RS	NS
OTU_1710	0.563612	-0.138286	0.677375	-0.204149	0.838237	RO	NS			OTU_0919	0.136203	-0.161115	0.978423	-0.164668	0.869206	RS	NS
OTU_1711	7.06312	-0.310209	0.375658	-0.825776	0.408931	RO	NS			OTU_0920	0.0146017	-0.242063	1.17605	-0.205827	0.836926	RS	NS
OTU_1712	0.498662	-0.463705	1.04777	-0.442563	0.658082	RO	NS			OTU_0921	0.0167992	-0.168816	1.17624	-0.143522	0.885878	RS	NS
OTU_1714	0.0215597	-0.178546	1.17421	-0.152057	0.879142	RO	NS			OTU_0924	0.0173223	-0.0486587	1.17644	-0.0413611	0.967008	RS	NS
OTU_1715	0.63243	-0.708572	0.766291	-0.924678	0.355133	RO	NS			OTU_0925	0.0178085	-0.0428319	1.17644	-0.0364079	0.970957	RS	NS
OTU_1717	0.251507	-0.229336	0.978983	-0.23426	0.814783	RO	NS			OTU_0926	92.5653	0.178652	0.189632	0.942098	0.346143	RS	NS
OTU_1720	0.0471718	-0.241088	1.17381	-0.20539	0.837268	RO	NS			OTU_0928	17.5369	0.790664	0.357419	2.21215	0.0269565	RS	NS
OTU_1724	0.463192	-0.00674586	0.939381	-0.00718117	0.99427	RO	NS			OTU_0929	0.445529	-0.169555	0.972632	-0.174326	0.86161	RS	NS
OTU_1730	0.00785547	-0.209831	1.17425	-0.178693	0.858179	RO	NS			OTU_0930	1.38088	-0.302662	0.229729	-1.31747	0.18768	RS	NS
OTU_1733	76.0741	0.0279915	0.199419	0.140365	0.888372	RO	NS			OTU_0931	0.196272	0.35775	1.17536	0.304376	0.760841	RS	NS
OTU_1734	4.63682	-0.448557	0.342099	-1.31119	0.189793	RO	NS			OTU_0932	0.594193	0.369664	0.492205	0.751035	0.452631	RS	NS
OTU_1735	0.183253	-0.707836	1.12641	-0.628401	0.529742	RO	NS			OTU_0934	0.513722	-1.02937	0.842562	-1.22171	0.221818	RS	NS
OTU_1736	2.13084	-0.117355	0.45369	-0.258667	0.795892	RO	NS			OTU_0935	0.245304	-0.10471	0.756365	-0.138438	0.889894	RS	NS
OTU_1737	0.871899	-0.256655	0.437398	-0.586777	0.557354	RO	NS			OTU_0936	0.147833	0.0537668	0.774068	0.06946	0.944623	RS	NS
OTU_1738	0.0117854	-0.266877	1.17411	-0.227301	0.82019	RO	NS			OTU_0937	0.0976886	0.0655771	1.00399	0.0653166	0.947922	RS	NS
OTU_1739	0.383309	-0.339131	0.893689	-0.379473	0.704337	RO	NS			OTU_0938	0.0182606	-0.0974313	1.17642	-0.0828202	0.933994	RS	NS
OTU_1740	0.21988	-0.0967567	1.12529	-0.0859838	0.931479	RO	NS			OTU_0939	0.172628	0.0424236	0.686002	0.0618418	0.950689	RS	NS
OTU_1741	0.0102003	-0.200253	1.17424	-0.170539	0.864587	RO	NS			OTU_0940	0.0649618	-0.206007	1.17578	-0.175209	0.860915	RS	NS
OTU_1742	0.278677	-0.199145	1.07411	-0.185404	0.852912	RO	NS			OTU_0941	0.0873901	0.158975	1.17619	0.13516	0.892485	RS	NS
OTU_1743	0.0232506	-0.211622	1.17426	-0.180218	0.856981	RO	NS			OTU_0942	0.0413253	-0.112836	1.17643	-0.0959142	0.923589	RS	NS
OTU_1745	0.0140086	-0.341945	1.1739	-0.291291	0.770829	RO	NS			OTU_0943	0.0804918	0.213375	1.17617	0.181415	0.856042	RS	NS
OTU_1746	0.0726659	-0.00780381	1.17386	-0.00664801	0.994696	RO	NS			OTU_0944	0.055901	-0.112378	1.17632	-0.0955331	0.923891	RS	NS
OTU_1750	0.576018	-0.194222	0.426123	-0.455789	0.648542	RO	NS			OTU_0946	0.0253707	-0.0903339	1.17646	-0.0767845	0.938795	RS	NS
OTU_1759	0.0619141	-0.0668722	1.17455	-0.0569343	0.954597	RO	NS			OTU_0947	0.0401076	-0.144295	1.17632	-0.122667	0.902371	RS	NS
OTU_1760	0.275854	-0.275135	1.17376	-0.234406	0.81467	RO	NS			OTU_0948	0.0160024	0.0286262	1.17638	0.0243342	0.980586	RS	NS
OTU_1766	0.010749	-0.32143	1.17398	-0.273796	0.784241	RO	NS			OTU_0949	5.72468	0.0283947	0.11131	0.255095	0.79865	RS	NS
OTU_1769	0.00691504	-0.213735	1.17426	-0.182017	0.85557	RO	NS			OTU_0950	3.03205	0.128321	0.275599	0.465606	0.641497	RS	NS
OTU_1770	29.9012	-0.398963	0.150973	-2.64261	0.00822694	RO	NS			OTU_0951	11.0711	-0.172813	0.225256	-0.767187	0.44297	RS	NS
OTU_1771	2.45512	-0.981861	0.497174	-1.97489	0.0482812	RO	NS			OTU_0952	0.94242	-0.0919925	0.497791	-0.184801	0.853385	RS	NS
OTU_1772	0.164607	-0.0518531	1.11056	-0.0466908	0.96276	RO	NS			OTU_0953	0.665041	-0.306301	0.80423	-0.380862	0.703305	RS	NS
OTU_1775	0.310255	0.344759	0.829515	0.415615	0.677692	RO	NS			OTU_0954	0.628875	0.331304	0.350003	0.946574	0.343856	RS	NS
OTU_1776	0.0465012	-0.178546	1.17421	-0.152057	0.879142	RO	NS			OTU_0955	0.544183	-0.138748	0.582545	-0.238175	0.811745	RS	NS
OTU_1778	0.292959	-0.501905	0.896434	-0.559891	0.575554	RO	NS			OTU_0956	0.178361	-0.307229	0.839753	-0.365856	0.714472	RS	NS
OTU_1779	0.0207969	-0.323761	1.17397	-0.275784	0.782714	RO	NS			OTU_0957	0.246695	0.281007	0.646684	0.434535	0.6639	RS	NS
OTU_1781	0.264933	-0.194049	0.520091	-0.373106	0.709069	RO	NS			OTU_0958	0.0706935	-0.168816	1.17624	-0.143522	0.885878	RS	NS
OTU_1785	0.0134421	-0.195162	1.17423	-0.166204	0.867997	RO	NS			OTU_0959	0.118224	-0.208552	0.983597	-0.21203	0.832084	RS	NS
OTU_1791	0.010994	-0.211622	1.17426	-0.180218	0.856981	RO	NS			OTU_0960	0.138889	0.232789	1.17605	0.197942	0.84309	RS	NS
OTU_1796	3.5923	0.591584	0.533019	1.10987	0.267053	RO	NS			OTU_0961	0.0787459	-0.0898598	1.17624	-0.0763956	0.939104	RS	NS
OTU_1797	0.690878	-0.410418	0.403595	-1.01691	0.309198	RO	NS			OTU_0962	0.0410652	0.135057	1.17629	0.114815	0.908591	RS	NS
OTU_1798	0.193272	-0.123213	1.09491	-0.112533	0.910401	RO	NS			OTU_0963	0.0247386	-0.0903339	1.17646	-0.0767845	0.938795	RS	NS
OTU_1799	1.96032	-0.182738	0.377804	-0.483684	0.62861	RO	NS			OTU_0964	0.0220874	-0.0486587	1.17644	-0.0413611	0.967008	RS	NS
OTU_1800	0.0105906	-0.211622	1.17426	-0.180218	0.856981	RO	NS			OTU_0965	0.0161604	-0.0486587	1.17644	-0.0413611	0.967008	RS	NS
OTU_1802	5.154	0.089293	0.348007	0.256584	0.7975	RO	NS			OTU_0966	0.0183804	-0.0486587	1.17644	-0.0413611	0.967008	RS	NS
OTU_1803	0.0219881	-0.178546	1.17421	-0.152057	0.879142	RO	NS			OTU_0968	15.0858	0.286215	0.315261	0.907868	0.363948	RS	NS
OTU_1804	0.326143	-0.434013	0.869966	-0.498885	0.617861	RO	NS			OTU_0969	60.9822	0.22263	0.280508	0.793665	0.427391	RS	NS
OTU_1805	0.0102003	-0.200253	1.17424	-0.170539	0.864587	RO	NS			OTU_0970	4.83264	0.172767	0.297119	0.581474	0.560921	RS	NS
OTU_1806	0.0856258	-0.0177738	1.17406	-0.0151388	0.987921	RO	NS			OTU_0971	8.54772	-0.205682	0.123266	-1.6686	0.0951964	RS	NS
OTU_1813	0.245489	-0.42348	0.671869	-0.630302	0.528497	RO	NS			OTU_0972	2.47139	-0.200278	0.240287	-0.833497	0.404565	RS	NS
OTU_1821	0.0312613	-0.323786	1.17371	-0.275867	0.78265	RO	NS			OTU_0973	89.1223	-0.0908807	0.0611352	-1.48655	0.137133	RS	NS
OTU_1825	0.0291245	-0.211622	1.17426	-0.180218	0.856981	RO	NS			OTU_0974	0.427629	-0.72691	0.64146	-1.13321	0.257125	RS	NS
OTU_1826	0.0131754	-0.279048	1.17402	-0.237687	0.812124	RO	NS			OTU_0975	0.131715	0.406293	1.12613	0.360787	0.718258	RS	NS
OTU_1828	71.4257	0.201843	0.631942	0.319402	0.749422	RO	NS			OTU_0976	0.0480434	-0.15033	1.17599	-0.127833	0.898281	RS	NS
OTU_1831	0.0470464	-0.1624	1.17403	-0.138327	0.889982	RO	NS			OTU_0977	0.170956	-0.0681253	1.07114	-0.0636009	0.949288	RS	NS
OTU_1832	0.248539	-0.0743395	1.17335	-0.0633566	0.949483	RO	NS			OTU_0978	0.0626091	-0.130975	1.17615	-0.111359	0.911332	RS	NS
OTU_1833	15.2485	-0.26456	0.250533	-1.05599	0.290973	RO	NS			OTU_0979	0.0204406	-0.0974313	1.17642	-0.0828202	0.933994	RS	NS
OTU_1834	0.346569	-0.488531	0.657804	-0.74267	0.457682	RO	NS			OTU_0980	0.0307111	-0.168816	1.17624	-0.143522	0.885878	RS	NS
OTU_1835	0.184899	-0.206534	0.674331	-0.30628	0.759392	RO	NS			OTU_0981	0.0210222	-0.0974313	1.17642	-0.0828202	0.933994	RS	NS
OTU_1836	0.0465012	-0.178546	1.17421	-0.152057	0.879142	RO	NS			OTU_0982	0.228959	-0.257861	0.934421	-0.275958	0.78258	RS	NS
OTU_1837	0.0112511	-0.266877	1.17411	-0.227301	0.82019	RO	NS			OTU_0983	3.68279	-0.363538	0.390342	-0.931333	0.351681	RS	NS
OTU_1838	0.043357	-0.349437	1.17354	-0.297763	0.765884	RO	NS			OTU_0984	2.4766	-0.354451	0.234447	-1.51186	0.13057	RS	NS
OTU_1841	0.361565	-0.666036	0.775325	-0.859041	0.390318	RO	NS			OTU_0985	4.58038	-0.00237764	0.0955507	-0.0248835	0.980148	RS	NS
OTU_1842	0.00510015	-0.22104	1.17427	-0.188237	0.850691	RO	NS			OTU_0986	21.5866	0.314266	0.166008	1.89307	0.0583485	RS	NS
OTU_1843	0.110939	-0.134141	0.888371	-0.150997	0.879978	RO	NS			OTU_0987	1.07923	-0.128553	0.242852	-0.529346	0.596565	RS	NS
OTU_1845	0.0083239	-0.211622	1.17426	-0.180218	0.856981	RO	NS			OTU_0988	0.710017	0.222939	0.381588	0.584241	0.559058	RS	NS
OTU_1849	0.0649178	-0.239519	1.17403	-0.204015	0.838342	RO	NS			OTU_0990	0.0590104	-0.0974313	1.17642	-0.0828202	0.933994	RS	NS
OTU_1851	0.0553203	-0.0535248	1.17397	-0.0455931	0.963635	RO	NS			OTU_0991	0.342091	0.408958	0.607098	0.673628	0.500548	RS	NS
OTU_1857	0.00531275	-0.173263	1.17439	-0.147534	0.88271	RO	NS			OTU_0992	0.0492903	-0.27495	1.17575	-0.23385	0.815101	RS	NS
OTU_1860	0.00691504	-0.213735	1.17426	-0.182017	0.85557	RO	NS			OTU_0993	0.271787	-0.431303	0.92372	-0.46692	0.640557	RS	NS
OTU_1861	0.0126131	-0.211622	1.17426	-0.180218	0.856981	RO	NS			OTU_0994	0.293869	0.345769	0.417655	0.827883	0.407737	RS	NS
OTU_1863	136.137	0.147854	0.460894	0.320798	0.748363	RO	NS			OTU_0995	0.514228	-0.0265531	0.51578	-0.0514814	0.958942	RS	NS
OTU_1864	2.1191	0.0192691	0.388259	0.0496296	0.960418	RO	NS			OTU_0996	0.270422	-0.0882522	0.651613	-0.135437	0.892267	RS	NS
OTU_1865	11.9005	0.306793	0.358039	0.856871	0.391516	RO	NS			OTU_0997	0.244816	-0.0512818	0.514949	-0.099586	0.920673	RS	NS
OTU_1866	0.604416	0.0760476	0.814715	0.0933425	0.925631	RO	NS			OTU_0998	0.195715	-0.161016	0.587547	-0.274047	0.784048	RS	NS
OTU_1867	0.0361168	-0.261267	1.17381	-0.222581	0.823862	RO	NS			OTU_0999	0.135265	0.0780023	0.986406	0.0790773	0.936971	RS	NS
OTU_1868	6.50346	-0.375969	0.281774	-1.33429	0.182109	RO	NS			OTU_1000	0.034401	-0.0891225	1.17637	-0.0757606	0.93961	RS	NS
OTU_1869	0.0286087	-0.359967	1.17371	-0.306691	0.759079	RO	NS			OTU_1001	0.178402	0.291617	0.690031	0.422614	0.672577	RS	NS
OTU_1870	0.921297	-0.0607567	0.746755	-0.0813609	0.935155	RO	NS			OTU_1002	0.137122	0.0770751	0.870497	0.0885415	0.929446	RS	NS
OTU_1871	0.300814	-0.239428	0.659913	-0.362818	0.716741	RO	NS			OTU_1003	0.10456	-0.291758	1.17504	-0.248296	0.803906	RS	NS
OTU_1872	0.0216323	-0.323761	1.17397	-0.275784	0.782714	RO	NS			OTU_1005	0.0154908	-0.0974313	1.17642	-0.0828202	0.933994	RS	NS
OTU_1873	0.11041	-0.167184	1.17392	-0.142415	0.886752	RO	NS			OTU_1006	0.0554256	-0.0212789	1.17636	-0.0180888	0.985568	RS	NS
OTU_1875	12.2851	-0.690829	0.211795	-3.26179	0.00110713	RO	Depleted			OTU_1009	0.0185879	-0.0337081	1.17642	-0.0286532	0.977141	RS	NS
OTU_1878	0.221347	-0.254723	1.1742	-0.216932	0.828261	RO	NS			OTU_1010	0.0167992	-0.168816	1.17624	-0.143522	0.885878	RS	NS
OTU_1881	0.0133493	-0.282408	1.17413	-0.240525	0.809924	RO	NS			OTU_1011	14.7649	0.236518	0.365521	0.647071	0.517586	RS	NS
OTU_1883	0.0568743	-0.313908	1.17371	-0.267449	0.789123	RO	NS			OTU_1012	11.7146	-0.180996	0.157095	-1.15215	0.249261	RS	NS
OTU_1887	0.0623906	-0.49147	1.1734	-0.418844	0.67533	RO	NS			OTU_1014	1.36384	0.571513	0.477086	1.19792	0.230946	RS	NS
OTU_1888	0.0120394	-0.111354	1.17448	-0.0948117	0.924464	RO	NS			OTU_1015	0.913342	0.431812	0.430091	1.004	0.315377	RS	NS
OTU_1891	19.053	1.21528	1.16619	1.0421	0.297365	RO	NS			OTU_1016	1.18926	-0.122876	0.228045	-0.538825	0.590008	RS	NS
OTU_1892	36.7288	0.0558254	0.269821	0.206898	0.83609	RO	NS			OTU_1017	1.90297	0.0050819	0.231753	0.0219281	0.982505	RS	NS
OTU_1893	2.2221	-1.01382	0.464154	-2.18424	0.0289447	RO	NS			OTU_1018	0.314685	-0.394403	0.961809	-0.410064	0.681759	RS	NS
OTU_1894	0.671816	-0.290631	0.53478	-0.54346	0.586813	RO	NS			OTU_1019	0.0800511	-0.243905	1.17577	-0.207443	0.835664	RS	NS
OTU_1896	507.367	-0.737524	0.485171	-1.52013	0.128477	RO	NS			OTU_1020	0.253103	-0.503767	0.691609	-0.728398	0.46637	RS	NS
OTU_1897	1.19841	0.126112	0.636914	0.198005	0.843041	RO	NS			OTU_1021	0.0978248	-0.274456	1.14456	-0.239792	0.810491	RS	NS
OTU_1899	0.0193668	-0.280095	1.17401	-0.23858	0.811431	RO	NS			OTU_1022	0.201327	0.158535	0.632683	0.250576	0.802142	RS	NS
OTU_1900	0.458034	-0.228632	1.17378	-0.194782	0.845563	RO	NS			OTU_1023	0.11163	-0.328765	1.13132	-0.290604	0.771354	RS	NS
OTU_1901	0.0578413	-0.0530673	1.17426	-0.0451921	0.963954	RO	NS			OTU_1024	0.0572248	0.178508	1.17623	0.151763	0.879374	RS	NS
OTU_1902	2.2654	0.472725	0.835123	0.566054	0.571357	RO	NS			OTU_1026	0.0409587	-0.0603118	1.17642	-0.0512671	0.959113	RS	NS
OTU_1903	0.667134	-0.276204	0.80668	-0.342396	0.732053	RO	NS			OTU_1027	0.0483954	-0.352247	1.17546	-0.299668	0.764431	RS	NS
OTU_1905	0.215821	-0.144975	1.17416	-0.123472	0.901734	RO	NS			OTU_1028	0.0210222	-0.0974313	1.17642	-0.0828202	0.933994	RS	NS
OTU_1906	0.152789	-0.206723	0.7334	-0.281869	0.778044	RO	NS			OTU_1029	0.0202065	-0.0486587	1.17644	-0.0413611	0.967008	RS	NS
OTU_1907	3.45357	-0.0832033	0.596175	-0.139562	0.889006	RO	NS			OTU_1030	38.2218	-1.49311	0.27568	-5.41609	6.09178e-08	RS	Depleted
OTU_1908	0.102539	-0.408413	1.17289	-0.348212	0.727681	RO	NS			OTU_1031	21.0956	0.240792	0.165354	1.45622	0.145332	RS	NS
OTU_1910	0.0624375	-0.0420912	1.17391	-0.0358556	0.971398	RO	NS			OTU_1032	7.75967	0.0637382	0.107829	0.591107	0.554449	RS	NS
OTU_1914	0.0240787	-0.00248919	1.17458	-0.00211921	0.998309	RO	NS			OTU_1033	0.0210222	-0.0974313	1.17642	-0.0828202	0.933994	RS	NS
OTU_1916	0.230582	-0.337626	0.852987	-0.395815	0.692241	RO	NS			OTU_1034	1.79343	0.0548282	0.232065	0.236262	0.813229	RS	NS
OTU_1919	0.0858156	-0.105544	1.17435	-0.0898746	0.928387	RO	NS			OTU_1035	1.89138	0.107189	0.267369	0.400901	0.688493	RS	NS
OTU_1921	0.0303113	-0.223413	1.17416	-0.190275	0.849094	RO	NS			OTU_1036	2.05502	0.00119489	0.179046	0.00667363	0.994675	RS	NS
OTU_1923	0.0247776	-0.147504	1.17416	-0.125625	0.900028	RO	NS			OTU_1037	3.32944	0.150295	0.158678	0.947165	0.343555	RS	NS
OTU_1927	0.0144523	-0.280095	1.17401	-0.23858	0.811431	RO	NS			OTU_1038	0.608283	0.308902	0.415196	0.74399	0.456882	RS	NS
OTU_1928	0.0105906	-0.211622	1.17426	-0.180218	0.856981	RO	NS			OTU_1040	4.64066	-0.0998746	0.127702	-0.782089	0.434162	RS	NS
OTU_1930	0.573867	-0.304331	1.0842	-0.280695	0.778944	RO	NS			OTU_1041	0.0997435	-0.344649	0.882575	-0.390505	0.696163	RS	NS
OTU_1931	0.199563	-0.28683	0.854408	-0.335706	0.737093	RO	NS			OTU_1042	0.490481	0.195214	0.521446	0.374371	0.708128	RS	NS
OTU_1932	23.9417	-1.06833	0.452277	-2.36212	0.0181706	RO	NS			OTU_1043	0.0169789	0.0590527	1.17635	0.0501998	0.959963	RS	NS
OTU_1933	0.144546	-0.534726	1.14318	-0.467752	0.639962	RO	NS			OTU_1044	0.594032	0.247692	0.397592	0.622979	0.533299	RS	NS
OTU_1934	65.393	-0.414465	0.198334	-2.08973	0.0366419	RO	NS			OTU_1045	0.149588	0.19718	0.863689	0.228299	0.819414	RS	NS
OTU_1935	18.8687	-0.246632	0.276755	-0.891157	0.372845	RO	NS			OTU_1046	0.202233	-0.194611	0.832861	-0.233665	0.815245	RS	NS
OTU_1936	0.00976529	-0.124227	1.17446	-0.105774	0.915762	RO	NS			OTU_1047	0.134938	0.0385303	0.857287	0.0449444	0.964152	RS	NS
OTU_1937	0.215156	-0.359128	1.17303	-0.306155	0.759487	RO	NS			OTU_1048	0.124062	-0.00507636	0.864373	-0.00587288	0.995314	RS	NS
OTU_1944	0.0614851	-0.254723	1.1742	-0.216932	0.828261	RO	NS			OTU_1049	0.10374	0.153961	1.14734	0.13419	0.893253	RS	NS
OTU_1947	0.011785	-0.266877	1.17411	-0.227301	0.82019	RO	NS			OTU_1050	0.100233	-0.237077	1.00166	-0.236685	0.812901	RS	NS
OTU_1951	0.0726341	-0.139707	1.17418	-0.118982	0.905289	RO	NS			OTU_1051	0.0624997	-0.00962875	1.17637	-0.00818513	0.993469	RS	NS
OTU_1952	0.00531275	-0.173263	1.17439	-0.147534	0.88271	RO	NS			OTU_1052	0.08954	-0.0154646	1.1589	-0.0133442	0.989353	RS	NS
OTU_1953	0.0216323	-0.323761	1.17397	-0.275784	0.782714	RO	NS			OTU_1053	0.0497012	-0.0737141	1.17636	-0.0626628	0.950035	RS	NS
OTU_1957	0.0366927	-0.162025	1.17418	-0.13799	0.890249	RO	NS			OTU_1054	0.0402241	-0.0544853	1.17643	-0.0463141	0.96306	RS	NS
OTU_1959	0.137953	-0.320358	0.869099	-0.368609	0.712419	RO	NS			OTU_1055	0.0379532	0.0708049	1.17633	0.0601911	0.952003	RS	NS
OTU_1961	0.0083239	-0.211622	1.17426	-0.180218	0.856981	RO	NS			OTU_1056	0.0302562	0.134307	1.1763	0.114178	0.909097	RS	NS
OTU_1966	0.0625787	-0.178546	1.17421	-0.152057	0.879142	RO	NS			OTU_1057	0.0172065	-0.135657	1.17639	-0.115316	0.908195	RS	NS
OTU_1967	0.0142801	-0.381146	1.17384	-0.324699	0.745409	RO	NS			OTU_1058	798.529	0.0465543	0.050836	0.915773	0.359786	RS	NS
OTU_1970	12.3385	-0.0806315	0.216599	-0.372261	0.709698	RO	NS			OTU_1059	194.517	0.142971	0.111692	1.28004	0.20053	RS	NS
OTU_1971	16.4019	0.230555	0.423991	0.543775	0.586597	RO	NS			OTU_1061	1.63913	-0.0102485	0.22732	-0.0450841	0.96404	RS	NS
OTU_1972	0.0606087	-0.227453	1.17427	-0.193697	0.846413	RO	NS			OTU_1062	1.19908	-0.254795	0.224027	-1.13734	0.255397	RS	NS
OTU_1973	0.181056	-0.598496	0.863914	-0.692773	0.488452	RO	NS			OTU_1063	0.848477	-0.227031	0.286874	-0.791396	0.428713	RS	NS
OTU_1974	10.7124	-0.65096	0.688028	-0.946125	0.344085	RO	NS			OTU_1064	38.3912	0.340473	0.20705	1.6444	0.100094	RS	NS
OTU_1975	0.0495285	-0.0343557	1.17411	-0.029261	0.976656	RO	NS			OTU_1065	0.701483	-0.619042	0.347954	-1.77909	0.0752245	RS	NS
OTU_1980	0.402263	-0.0586219	1.03055	-0.0568843	0.954637	RO	NS			OTU_1067	0.422635	-0.199189	0.385555	-0.51663	0.605414	RS	NS
OTU_1981	0.145858	-0.245645	1.17382	-0.20927	0.834237	RO	NS			OTU_1068	0.258638	-0.326275	0.593239	-0.549988	0.582327	RS	NS
OTU_1982	11.6303	-0.408863	0.341913	-1.19581	0.23177	RO	NS			OTU_1069	0.475448	-0.414838	0.49651	-0.835508	0.403432	RS	NS
OTU_1984	0.304306	-0.310708	1.17331	-0.264812	0.791154	RO	NS			OTU_1070	0.306775	-0.30238	0.549949	-0.549833	0.582434	RS	NS
OTU_1985	0.0157658	-0.200194	1.17435	-0.170472	0.864639	RO	NS			OTU_1071	0.14337	0.222574	0.774294	0.287454	0.773765	RS	NS
OTU_1986	0.0144523	-0.280095	1.17401	-0.23858	0.811431	RO	NS			OTU_1074	0.141362	-0.493444	1.17461	-0.420091	0.674419	RS	NS
OTU_1988	0.12297	-0.266876	1.17411	-0.227301	0.82019	RO	NS			OTU_1075	0.13137	0.0494052	1.17623	0.042003	0.966496	RS	NS
OTU_1989	0.13197	-0.289823	0.819965	-0.353458	0.723745	RO	NS			OTU_1076	0.0619562	0.182301	1.1762	0.154991	0.876828	RS	NS
OTU_1991	0.0730285	-0.195162	1.17423	-0.166204	0.867997	RO	NS			OTU_1077	0.0337991	0.106509	1.17632	0.0905442	0.927855	RS	NS
OTU_1997	0.142091	-0.219858	1.17403	-0.187268	0.85145	RO	NS			OTU_1078	0.0494502	-0.262875	1.1759	-0.223552	0.823106	RS	NS
OTU_1999	0.110901	-0.377137	1.17362	-0.321346	0.747948	RO	NS			OTU_1079	0.0200841	0.0783834	1.17634	0.0666334	0.946874	RS	NS
OTU_2000	0.0716345	-0.207743	1.17396	-0.176959	0.85954	RO	NS			OTU_1080	0.0366736	-0.0603118	1.17642	-0.0512671	0.959113	RS	NS
OTU_2005	0.0120394	-0.111354	1.17448	-0.0948117	0.924464	RO	NS			OTU_1081	0.0250329	-0.168816	1.17624	-0.143522	0.885878	RS	NS
OTU_2007	0.0138301	-0.186229	1.17422	-0.158598	0.873985	RO	NS			OTU_1083	0.186409	-0.241608	0.848658	-0.284694	0.775879	RS	NS
OTU_2008	0.0101461	-0.270868	1.17408	-0.230707	0.817542	RO	NS			OTU_1087	9.42312	0.0498214	0.205379	0.242583	0.808329	RS	NS
OTU_2014	25.3335	-0.464949	0.177697	-2.61653	0.00888295	RO	NS			OTU_1088	4.52452	0.0545403	0.327669	0.16645	0.867803	RS	NS
OTU_2015	14.25	-0.0719248	0.342914	-0.209746	0.833866	RO	NS			OTU_1089	3.81977	0.203312	0.14055	1.44655	0.148023	RS	NS
OTU_2017	0.04774	-0.307228	1.1738	-0.261738	0.793524	RO	NS			OTU_1090	1.07723	0.0280721	0.273891	0.102494	0.918365	RS	NS
OTU_2018	4.92807	-1.1511	0.477624	-2.41006	0.0159498	RO	NS			OTU_1091	1.01237	0.260773	0.377319	0.69112	0.48949	RS	NS
OTU_2019	0.261688	-0.175691	0.491417	-0.35752	0.720703	RO	NS			OTU_1092	0.813171	-0.0787373	0.290668	-0.270883	0.786481	RS	NS
OTU_2020	1.89022	0.337931	0.545166	0.619868	0.535345	RO	NS			OTU_1093	0.609805	0.0416767	0.311409	0.133833	0.893535	RS	NS
OTU_2022	18.3931	-0.367102	0.226944	-1.61759	0.105752	RO	NS			OTU_1094	0.265102	0.0194017	1.03241	0.0187926	0.985007	RS	NS
OTU_2023	0.0240787	-0.00248919	1.17458	-0.00211921	0.998309	RO	NS			OTU_1095	0.497558	-0.434868	0.473801	-0.917828	0.358709	RS	NS
OTU_2024	0.0287898	-0.200194	1.17435	-0.170472	0.864639	RO	NS			OTU_1097	0.0845121	0.182438	1.02485	0.178014	0.858712	RS	NS
OTU_2025	1.11654	-1.0347	0.721315	-1.43446	0.15144	RO	NS			OTU_1098	0.141001	-0.355398	0.964494	-0.368481	0.712514	RS	NS
OTU_2026	0.10423	-0.112519	1.1738	-0.0958588	0.923633	RO	NS			OTU_1099	0.164293	0.181368	1.11493	0.162671	0.870777	RS	NS
OTU_2027	0.829359	0.616469	0.623293	0.989051	0.322638	RO	NS			OTU_1100	0.107397	-0.0103173	0.886107	-0.0116434	0.99071	RS	NS
OTU_2028	0.383138	-0.796914	0.883504	-0.901992	0.367061	RO	NS			OTU_1101	686.88	0.0529996	0.0902377	0.587332	0.55698	RS	NS
OTU_2029	0.0389616	-0.149258	1.17416	-0.127119	0.898846	RO	NS			OTU_1102	0.0322169	-0.227676	1.17599	-0.193603	0.846486	RS	NS
OTU_2033	0.0126371	-0.155972	1.17441	-0.132809	0.894345	RO	NS			OTU_1103	0.0331529	-0.0666175	1.1764	-0.0566282	0.954841	RS	NS
OTU_2040	0.0322471	-0.439796	1.17356	-0.374754	0.707843	RO	NS			OTU_1104	0.0182606	-0.0974313	1.17642	-0.0828202	0.933994	RS	NS
OTU_2042	0.0365078	-0.263556	1.17386	-0.224521	0.822352	RO	NS			OTU_1105	0.051254	-0.295017	1.17579	-0.250909	0.801884	RS	NS
OTU_2043	0.00567205	-0.218584	1.17426	-0.186146	0.85233	RO	NS			OTU_1107	0.0185879	-0.0337081	1.17642	-0.0286532	0.977141	RS	NS
OTU_2044	0.074111	-0.170325	1.17392	-0.145091	0.884639	RO	NS			OTU_1108	0.0161258	-0.254266	1.17601	-0.216212	0.828823	RS	NS
OTU_2046	0.0449673	-0.283178	1.1737	-0.24127	0.809346	RO	NS			OTU_1109	0.0247386	-0.0903339	1.17646	-0.0767845	0.938795	RS	NS
OTU_2047	0.00976529	-0.124227	1.17446	-0.105774	0.915762	RO	NS			OTU_1110	0.0162256	-0.0486587	1.17644	-0.0413611	0.967008	RS	NS
OTU_2049	0.0117854	-0.266877	1.17411	-0.227301	0.82019	RO	NS			OTU_1111	0.0215152	-0.0486587	1.17644	-0.0413611	0.967008	RS	NS
OTU_2050	9.28101	-0.412029	0.271776	-1.51606	0.129504	RO	NS			OTU_1112	670.643	-0.0349549	0.0579387	-0.603309	0.546303	RS	NS
OTU_2051	57.6709	-0.174768	0.1959	-0.892127	0.372325	RO	NS			OTU_1113	4.62128	-0.0182045	0.345461	-0.0526962	0.957974	RS	NS
OTU_2052	1.81433	-0.258743	0.552246	-0.468529	0.639407	RO	NS			OTU_1114	5.1423	0.022539	0.0912026	0.247131	0.804807	RS	NS
OTU_2053	2.78748	-0.00795003	0.660014	-0.0120452	0.99039	RO	NS			OTU_1115	13.145	-0.0659184	0.528543	-0.124717	0.900747	RS	NS
OTU_2054	0.634877	-0.141115	0.704197	-0.200391	0.841175	RO	NS			OTU_1116	20.5221	-0.164837	0.26478	-0.622544	0.533584	RS	NS
OTU_2055	17.3451	-0.640889	0.349044	-1.83613	0.0663391	RO	NS			OTU_1117	2.70251	0.168323	0.273135	0.616264	0.53772	RS	NS
OTU_2056	4.70274	-0.814339	0.4846	-1.68044	0.0928726	RO	NS			OTU_1118	0.488768	0.123731	0.51369	0.240868	0.809658	RS	NS
OTU_2058	0.669367	-0.362813	0.65072	-0.557556	0.577148	RO	NS			OTU_1119	2.10314	-0.267239	0.203931	-1.31044	0.190048	RS	NS
OTU_2060	2.0351	-0.613593	0.385116	-1.59327	0.1111	RO	NS			OTU_1120	1.47166	-0.0985058	0.253535	-0.38853	0.697624	RS	NS
OTU_2061	0.281626	-0.308771	0.668118	-0.462149	0.643974	RO	NS			OTU_1121	2.37585	-0.059314	0.296909	-0.199772	0.841659	RS	NS
OTU_2062	0.0145233	-0.200844	1.17424	-0.171041	0.864191	RO	NS			OTU_1122	0.138072	0.0511803	1.11917	0.0457306	0.963525	RS	NS
OTU_2063	0.0375927	-0.200194	1.17435	-0.170472	0.864639	RO	NS			OTU_1123	0.911221	-0.406922	0.500064	-0.81374	0.415794	RS	NS
OTU_2064	0.170521	0.339334	1.12964	0.300392	0.763878	RO	NS			OTU_1124	0.865963	0.933071	0.51259	1.8203	0.0687126	RS	NS
OTU_2070	0.115103	-0.0461597	0.99347	-0.0464631	0.962941	RO	NS			OTU_1125	0.48209	0.20539	0.516636	0.397554	0.690959	RS	NS
OTU_2071	19.2024	-0.170931	0.236442	-0.722933	0.469721	RO	NS			OTU_1126	0.432077	0.0704287	0.43095	0.163427	0.870183	RS	NS
OTU_2075	0.0259986	-0.23556	1.17406	-0.200638	0.840982	RO	NS			OTU_1127	0.46723	-0.0869645	0.384907	-0.225937	0.821251	RS	NS
OTU_2077	0.00625826	-0.216198	1.17426	-0.184114	0.853924	RO	NS			OTU_1128	6.35409	0.053121	0.227938	0.23305	0.815723	RS	NS
OTU_2082	0.445425	-0.321846	0.638898	-0.503753	0.614435	RO	NS			OTU_1129	1.99984	-0.229302	0.184454	-1.24314	0.213817	RS	NS
OTU_2086	0.00572071	-0.168806	1.17439	-0.143739	0.885707	RO	NS			OTU_1130	0.16479	-0.423238	0.767485	-0.551461	0.581317	RS	NS
OTU_2087	0.0082592	-0.211622	1.17426	-0.180218	0.856981	RO	NS			OTU_1131	27.287	0.122125	0.0923873	1.32188	0.186208	RS	NS
OTU_2089	1.15069	0.350494	0.419727	0.835053	0.403688	RO	NS			OTU_1132	0.221477	-0.455134	0.633042	-0.718963	0.472164	RS	NS
OTU_2091	0.359262	-0.710477	1.02935	-0.690218	0.490057	RO	NS			OTU_1133	0.0977217	0.0234228	1.00467	0.0233138	0.9814	RS	NS
OTU_2092	0.0781312	-0.301695	1.1738	-0.257025	0.797159	RO	NS			OTU_1134	0.0904332	-0.129119	1.16854	-0.110496	0.912016	RS	NS
OTU_2093	0.156676	-0.214484	1.11882	-0.191705	0.847973	RO	NS			OTU_1135	0.0493095	-0.10453	1.17638	-0.088857	0.929196	RS	NS
OTU_2095	0.049913	0.0241156	1.17458	0.0205313	0.98362	RO	NS			OTU_1136	0.116341	0.132418	0.982263	0.134809	0.892763	RS	NS
OTU_2099	0.0363249	0.0207554	1.17447	0.0176721	0.9859	RO	NS			OTU_1137	0.0231476	-0.0974313	1.17642	-0.0828202	0.933994	RS	NS
OTU_2102	0.0503307	-0.282408	1.17413	-0.240525	0.809924	RO	NS			OTU_1138	0.0658236	0.0377552	1.17635	0.0320951	0.974396	RS	NS
OTU_2103	0.0739158	-0.312686	1.02896	-0.303886	0.761215	RO	NS			OTU_1139	0.0162066	-0.168816	1.17624	-0.143522	0.885878	RS	NS
OTU_2106	0.121555	-0.321815	1.17385	-0.274155	0.783966	RO	NS			OTU_1140	0.0585117	0.0377552	1.17635	0.0320951	0.974396	RS	NS
OTU_2109	0.00957072	-0.313617	1.17401	-0.267134	0.789366	RO	NS			OTU_1141	0.0154908	-0.0974313	1.17642	-0.0828202	0.933994	RS	NS
OTU_2110	0.00957072	-0.313617	1.17401	-0.267134	0.789366	RO	NS			OTU_1142	0.0340151	-0.128336	1.17632	-0.1091	0.913123	RS	NS
OTU_2111	0.0142801	-0.381146	1.17384	-0.324699	0.745409	RO	NS			OTU_1143	0.0185879	-0.0337081	1.17642	-0.0286532	0.977141	RS	NS
OTU_2112	0.0118957	-0.328811	1.17395	-0.28009	0.779408	RO	NS			OTU_1144	0.0242574	-0.168816	1.17624	-0.143522	0.885878	RS	NS
OTU_2113	0.0131713	-0.195162	1.17423	-0.166204	0.867997	RO	NS			OTU_1145	0.0317342	-0.0486587	1.17644	-0.0413611	0.967008	RS	NS
OTU_2115	0.0544973	-0.211622	1.17426	-0.180218	0.856981	RO	NS			OTU_1146	0.0453309	0.00784762	1.17639	0.00667093	0.994677	RS	NS
OTU_2119	15.0104	-0.172609	0.20412	-0.845623	0.397763	RO	NS			OTU_1147	58.4622	-0.218277	0.127973	-1.70564	0.0880752	RS	NS
OTU_2120	4.69978	0.209678	0.355986	0.589007	0.555857	RO	NS			OTU_1148	43.6436	0.0438668	0.183727	0.238761	0.811291	RS	NS
OTU_2121	4.08119	-0.0370406	0.336166	-0.110185	0.912262	RO	NS			OTU_1149	5.45348	0.0819048	0.161266	0.507887	0.611533	RS	NS
OTU_2123	0.638385	0.129212	0.804642	0.160583	0.872422	RO	NS			OTU_1150	1.21376	0.61868	0.310074	1.99527	0.0460137	RS	NS
OTU_2124	0.178555	-0.203587	1.17399	-0.173414	0.862326	RO	NS			OTU_1151	0.702687	0.201185	0.493881	0.407356	0.683746	RS	NS
OTU_2125	0.452292	-0.847623	0.711787	-1.19084	0.233718	RO	NS			OTU_1152	0.668272	0.522064	0.665312	0.784691	0.432635	RS	NS
OTU_2126	0.101377	-0.676723	1.17291	-0.57696	0.563966	RO	NS			OTU_1154	0.692074	0.0283514	0.90244	0.0314163	0.974938	RS	NS
OTU_2127	0.00691504	-0.213735	1.17426	-0.182017	0.85557	RO	NS			OTU_1155	0.541691	0.322052	0.446596	0.721127	0.470831	RS	NS
OTU_2129	0.0736104	-0.280095	1.17401	-0.23858	0.811431	RO	NS			OTU_1156	0.0220874	-0.0486587	1.17644	-0.0413611	0.967008	RS	NS
OTU_2130	1.49996	0.676736	0.864784	0.782549	0.433892	RO	NS			OTU_1157	0.327001	-0.107493	0.469036	-0.229178	0.81873	RS	NS
OTU_2132	0.112893	-0.128667	1.17398	-0.109599	0.912727	RO	NS			OTU_1158	0.278517	0.24497	0.64978	0.377004	0.70617	RS	NS
OTU_2133	0.182437	0.0371041	0.800048	0.0463774	0.963009	RO	NS			OTU_1159	0.38719	0.179864	0.436414	0.41214	0.680237	RS	NS
OTU_2141	0.0415054	-0.093087	1.17405	-0.0792872	0.936804	RO	NS			OTU_1160	0.0415046	-0.10453	1.17638	-0.088857	0.929196	RS	NS
OTU_2146	0.0120394	-0.111354	1.17448	-0.0948117	0.924464	RO	NS			OTU_1162	0.269381	-0.0949426	0.636199	-0.149234	0.881369	RS	NS
OTU_2148	16.3746	0.165356	0.376067	0.439698	0.660156	RO	NS			OTU_1163	0.0400687	-0.00380345	1.17638	-0.00323319	0.99742	RS	NS
OTU_2149	3.01308	0.176292	0.595905	0.295839	0.767353	RO	NS			OTU_1166	0.0679276	-0.146696	1.17616	-0.124725	0.900741	RS	NS
OTU_2150	0.0235664	-0.151052	1.17417	-0.128647	0.897637	RO	NS			OTU_1167	0.131002	-0.0352409	0.964971	-0.0365202	0.970868	RS	NS
OTU_2151	0.00658019	-0.292557	1.17409	-0.249177	0.803224	RO	NS			OTU_1168	0.0452584	-0.281883	1.17579	-0.239739	0.810533	RS	NS
OTU_2153	0.0815506	-0.62184	1.17304	-0.530111	0.596035	RO	NS			OTU_1169	0.0495547	-0.00632357	1.17634	-0.00537563	0.995711	RS	NS
OTU_2154	2.929	0.280295	0.518642	0.54044	0.588894	RO	NS			OTU_1171	0.038577	-0.0666175	1.1764	-0.0566282	0.954841	RS	NS
OTU_2155	0.0134421	-0.195162	1.17423	-0.166204	0.867997	RO	NS			OTU_1172	0.062628	-0.0603118	1.17642	-0.0512671	0.959113	RS	NS
OTU_2156	0.245802	-0.123818	0.957548	-0.129308	0.897114	RO	NS			OTU_1173	0.0348567	-0.0129305	1.1764	-0.0109915	0.99123	RS	NS
OTU_2157	2.61973	0.0297915	0.340706	0.0874405	0.930321	RO	NS			OTU_1174	0.0170618	-0.0974313	1.17642	-0.0828202	0.933994	RS	NS
OTU_2159	0.133104	-0.0809849	1.17364	-0.0690033	0.944987	RO	NS			OTU_1175	0.0231476	-0.0974313	1.17642	-0.0828202	0.933994	RS	NS
OTU_2161	0.420245	-1.18491	1.17099	-1.01188	0.311595	RO	NS			OTU_1176	0.0204406	-0.0974313	1.17642	-0.0828202	0.933994	RS	NS
OTU_2162	1.53215	0.0236421	0.352811	0.0670106	0.946573	RO	NS			OTU_1177	0.0215971	-0.0486587	1.17644	-0.0413611	0.967008	RS	NS
OTU_2164	0.0166709	-0.266876	1.17411	-0.227301	0.82019	RO	NS			OTU_1178	0.208599	0.137872	0.573343	0.24047	0.809966	RS	NS
OTU_2167	0.14546	-0.417991	1.12347	-0.372055	0.709852	RO	NS			OTU_1179	4.18922	-0.25977	0.209325	-1.24099	0.21461	RS	NS
OTU_2172	0.0243428	-0.227453	1.17427	-0.193697	0.846413	RO	NS			OTU_1180	4.18423	-0.0558903	0.298625	-0.187159	0.851536	RS	NS
OTU_2173	0.0315317	-0.155972	1.17441	-0.132809	0.894345	RO	NS			OTU_1181	2.70162	0.234358	0.328608	0.713185	0.475731	RS	NS
OTU_2175	0.0507936	-0.155972	1.17441	-0.132809	0.894345	RO	NS			OTU_1182	7.00914	-0.968982	0.546844	-1.77195	0.0764024	RS	NS
OTU_2184	0.0140086	-0.341945	1.1739	-0.291291	0.770829	RO	NS			OTU_1183	3.79014	-0.239105	0.589693	-0.405474	0.685129	RS	NS
OTU_2185	0.0193668	-0.280095	1.17401	-0.23858	0.811431	RO	NS			OTU_1184	2.50892	-0.180849	0.252102	-0.717364	0.47315	RS	NS
OTU_2188	0.34265	-0.112788	0.627948	-0.179613	0.857456	RO	NS			OTU_1185	2.60883	0.353804	0.212743	1.66306	0.0963003	RS	NS
OTU_2189	0.484723	-0.740876	0.73446	-1.00874	0.313101	RO	NS			OTU_1186	1.28968	0.275952	0.242303	1.13887	0.254757	RS	NS
OTU_2190	7.84442	0.281909	0.358692	0.785936	0.431905	RO	NS			OTU_1187	1.52527	0.190192	0.208013	0.91433	0.360544	RS	NS
OTU_2191	4.60287	0.053332	0.482061	0.110633	0.911907	RO	NS			OTU_1188	0.961211	0.423064	0.387604	1.09149	0.275059	RS	NS
OTU_2193	1.4311	0.393439	0.277195	1.41936	0.155795	RO	NS			OTU_1189	0.59869	-0.161853	0.407561	-0.397125	0.691275	RS	NS
OTU_2194	0.0572762	-0.447343	1.1734	-0.381236	0.703028	RO	NS			OTU_1190	0.256554	-0.262059	0.50802	-0.515845	0.605963	RS	NS
OTU_2195	0.455216	-0.100878	0.621779	-0.162241	0.871116	RO	NS			OTU_1191	92.4205	0.086996	0.168125	0.517447	0.604844	RS	NS
OTU_2196	1.13743	0.602004	0.908906	0.662339	0.507754	RO	NS			OTU_1192	0.0438569	-0.0974313	1.17642	-0.0828202	0.933994	RS	NS
OTU_2197	0.166404	-0.782324	1.1382	-0.687336	0.491871	RO	NS			OTU_1193	0.254086	-0.0556779	0.773688	-0.0719643	0.94263	RS	NS
OTU_2198	0.332523	0.228967	0.889334	0.257459	0.796825	RO	NS			OTU_1194	0.0790129	0.0840187	1.1763	0.071426	0.943059	RS	NS
OTU_2199	2.44623	0.647845	0.902486	0.717845	0.472853	RO	NS			OTU_1195	0.0373173	-0.0603118	1.17642	-0.0512671	0.959113	RS	NS
OTU_2200	0.0920086	-0.0650738	1.17343	-0.055456	0.955775	RO	NS			OTU_1196	0.323228	0.177721	0.490755	0.362137	0.71725	RS	NS
OTU_2201	0.803427	0.120959	0.321118	0.376681	0.706411	RO	NS			OTU_1197	0.160279	0.0840771	0.777878	0.108085	0.913928	RS	NS
OTU_2202	0.26226	-0.587557	0.986383	-0.595668	0.551397	RO	NS			OTU_1198	0.25056	0.123023	0.540351	0.227673	0.819901	RS	NS
OTU_2204	0.108995	-0.178546	1.17421	-0.152057	0.879142	RO	NS			OTU_1199	0.12686	-0.0923689	0.869888	-0.106185	0.915436	RS	NS
OTU_2208	0.117142	-0.157538	1.15191	-0.136763	0.891218	RO	NS			OTU_1200	0.0911249	0.0826114	1.15918	0.0712674	0.943185	RS	NS
OTU_2209	0.0419536	-0.392238	1.17365	-0.334204	0.738226	RO	NS			OTU_1201	0.137008	0.126706	1.10656	0.114505	0.908838	RS	NS
OTU_2212	0.0102003	-0.200253	1.17424	-0.170539	0.864587	RO	NS			OTU_1202	0.0808439	-0.0741364	1.17625	-0.063028	0.949744	RS	NS
OTU_2213	0.317983	-0.507558	0.893366	-0.568141	0.569939	RO	NS			OTU_1203	0.0160911	-0.0486587	1.17644	-0.0413611	0.967008	RS	NS
OTU_2216	0.0104204	-0.271624	1.17407	-0.231352	0.817041	RO	NS			OTU_1204	0.0408257	0.0530191	1.17634	0.0450712	0.964051	RS	NS
OTU_2218	0.0509569	-0.328225	1.17368	-0.279655	0.779742	RO	NS			OTU_1205	0.289765	-0.252292	0.695276	-0.362866	0.716705	RS	NS
OTU_2224	0.110914	-0.25063	1.17383	-0.213515	0.830925	RO	NS			OTU_1207	0.0634058	-0.10453	1.17638	-0.088857	0.929196	RS	NS
OTU_2226	0.0082592	-0.211622	1.17426	-0.180218	0.856981	RO	NS			OTU_1208	0.036389	0.0643599	1.17635	0.0547115	0.956368	RS	NS
OTU_2238	0.010994	-0.211622	1.17426	-0.180218	0.856981	RO	NS			OTU_1209	0.0247386	-0.0903339	1.17646	-0.0767845	0.938795	RS	NS
OTU_2239	161.637	-0.433374	0.229749	-1.88629	0.0592554	RO	NS			OTU_1211	333.521	0.0530762	0.0832429	0.637607	0.52373	RS	NS
OTU_2240	1.39174	-0.19557	0.464105	-0.421392	0.673469	RO	NS			OTU_1212	14.9104	-0.0627799	0.205822	-0.30502	0.760351	RS	NS
OTU_2241	2.15085	0.222502	0.518725	0.428941	0.667966	RO	NS			OTU_1213	34.1639	0.163303	0.0998643	1.63525	0.101997	RS	NS
OTU_2242	0.159735	-0.307096	0.865907	-0.354652	0.72285	RO	NS			OTU_1214	20.5376	0.00781186	0.0787622	0.0991829	0.920993	RS	NS
OTU_2243	1.50313	0.145827	0.433498	0.336396	0.736572	RO	NS			OTU_1215	6.08085	0.16646	0.40549	0.410517	0.681427	RS	NS
OTU_2244	2.62606	0.210197	0.555636	0.3783	0.705207	RO	NS			OTU_1216	2.81716	0.0557112	0.164796	0.338061	0.735317	RS	NS
OTU_2245	0.776308	-0.427598	0.669849	-0.638349	0.523246	RO	NS			OTU_1217	1.32672	0.212676	0.309497	0.687168	0.491977	RS	NS
OTU_2246	10.9255	-0.241031	0.226046	-1.06629	0.286291	RO	NS			OTU_1218	1.29981	0.230137	0.297425	0.773765	0.43907	RS	NS
OTU_2248	0.0582319	-0.266876	1.17411	-0.227301	0.82019	RO	NS			OTU_1219	1.36266	-0.0858471	0.316036	-0.271637	0.785901	RS	NS
OTU_2249	0.193952	-0.262976	0.968888	-0.27142	0.786068	RO	NS			OTU_1220	1.32717	0.366228	0.395884	0.925088	0.35492	RS	NS
OTU_2250	0.151177	0.302084	1.1549	0.261566	0.793656	RO	NS			OTU_1221	0.0783326	0.318713	1.17598	0.271019	0.786376	RS	NS
OTU_2254	0.0354298	-0.178546	1.17421	-0.152057	0.879142	RO	NS			OTU_1222	0.569344	0.103897	0.479083	0.216867	0.828312	RS	NS
OTU_2256	0.0257215	-0.261702	1.17391	-0.222932	0.823589	RO	NS			OTU_1223	1.84153	-0.271091	0.352143	-0.769832	0.441399	RS	NS
OTU_2257	0.0118244	-0.254723	1.1742	-0.216932	0.828261	RO	NS			OTU_1224	0.161044	0.0823549	0.764875	0.107671	0.914257	RS	NS
OTU_2263	0.0245246	-0.200194	1.17435	-0.170472	0.864639	RO	NS			OTU_1225	0.378403	0.299971	0.498987	0.60116	0.547734	RS	NS
OTU_2264	0.0630634	-0.0668722	1.17455	-0.0569343	0.954597	RO	NS			OTU_1226	0.32044	-0.156088	0.581672	-0.268344	0.788435	RS	NS
OTU_2268	0.0361657	-0.420723	1.17362	-0.358483	0.719982	RO	NS			OTU_1227	0.149011	-0.391581	0.850195	-0.460577	0.645102	RS	NS
OTU_2271	0.0873478	-0.337802	1.17398	-0.28774	0.773546	RO	NS			OTU_1228	0.252793	0.0952803	0.842835	0.113047	0.909993	RS	NS
OTU_2275	8.98544	-0.474258	0.319445	-1.48463	0.137642	RO	NS			OTU_1229	0.0166622	-0.0843834	1.17647	-0.0717258	0.94282	RS	NS
OTU_2276	0.277798	0.275795	1.02811	0.268254	0.788504	RO	NS			OTU_1230	0.940415	-0.287138	0.267879	-1.07189	0.283768	RS	NS
OTU_2277	11.7183	-0.544046	0.197268	-2.7579	0.00581732	RO	NS			OTU_1231	1864.35	0.0419975	0.0788918	0.532343	0.594488	RS	NS
OTU_2278	0.747393	-0.55301	0.58568	-0.944219	0.345058	RO	NS			OTU_1232	0.0864572	-0.176565	1.02615	-0.172065	0.863387	RS	NS
OTU_2279	22.7824	0.0734874	0.260173	0.282456	0.777594	RO	NS			OTU_1233	0.109968	-0.512937	1.1745	-0.436728	0.662309	RS	NS
OTU_2280	0.463357	-0.644978	0.662956	-0.972882	0.330612	RO	NS			OTU_1234	0.188449	-0.183689	0.752787	-0.244012	0.807222	RS	NS
OTU_2282	1.70235	-1.19764	0.658912	-1.8176	0.0691258	RO	NS			OTU_1236	0.0549267	-0.152379	1.17612	-0.129561	0.896914	RS	NS
OTU_2284	0.180936	-0.481034	1.17271	-0.410189	0.681667	RO	NS			OTU_1237	0.0866781	-0.288417	1.17562	-0.245331	0.8062	RS	NS
OTU_2285	0.507915	0.386837	0.811333	0.476792	0.63351	RO	NS			OTU_1238	0.0153285	0.04824	1.17636	0.0410078	0.96729	RS	NS
OTU_2286	0.563822	-0.584469	0.857671	-0.681461	0.49558	RO	NS			OTU_1239	0.0378555	-0.10453	1.17638	-0.088857	0.929196	RS	NS
OTU_2288	0.0539652	-0.21196	1.17362	-0.180605	0.856678	RO	NS			OTU_1240	0.0184129	-0.0903339	1.17646	-0.0767845	0.938795	RS	NS
OTU_2289	0.0443992	-0.105544	1.17435	-0.089875	0.928387	RO	NS			OTU_1242	0.0146017	-0.242063	1.17605	-0.205827	0.836926	RS	NS
OTU_2292	0.0570425	-0.405521	1.17357	-0.345546	0.729684	RO	NS			OTU_1243	0.0314962	-0.12096	1.17624	-0.102836	0.918093	RS	NS
OTU_2293	0.0291245	-0.211622	1.17426	-0.180218	0.856981	RO	NS			OTU_1245	17.5527	0.01809	0.0965586	0.187348	0.851388	RS	NS
OTU_2294	0.0530921	-0.308803	1.1738	-0.263079	0.79249	RO	NS			OTU_1246	15.8825	-0.11189	0.269629	-0.414978	0.678158	RS	NS
OTU_2296	0.0948004	-0.274255	1.17318	-0.233771	0.815163	RO	NS			OTU_1247	9.21593	-0.200899	0.169092	-1.18811	0.234791	RS	NS
OTU_2297	0.0507936	-0.155972	1.17441	-0.132809	0.894345	RO	NS			OTU_1248	9.75909	-0.165214	0.245653	-0.67255	0.501234	RS	NS
OTU_2302	0.0472975	-0.155972	1.17441	-0.132809	0.894345	RO	NS			OTU_1249	472.33	-0.0505624	0.104591	-0.483429	0.628791	RS	NS
OTU_2303	0.0429961	-0.487391	1.17341	-0.415363	0.677876	RO	NS			OTU_1250	6.43686	1.12327	0.378813	2.96524	0.00302447	RS	NS
OTU_2304	0.121813	-0.118233	1.17398	-0.100712	0.919779	RO	NS			OTU_1251	79.2288	-0.4279	0.161502	-2.64951	0.00806097	RS	NS
OTU_2310	0.00567205	-0.218584	1.17426	-0.186146	0.85233	RO	NS			OTU_1252	0.698683	0.473762	0.765788	0.61866	0.53614	RS	NS
OTU_2311	0.0173237	-0.280095	1.17401	-0.23858	0.811431	RO	NS			OTU_1253	0.428141	0.312489	0.560932	0.55709	0.577466	RS	NS
OTU_2312	0.00625826	-0.216198	1.17426	-0.184114	0.853924	RO	NS			OTU_1254	1.23883	0.199094	0.754065	0.264027	0.791759	RS	NS
OTU_2313	0.0220722	-0.365122	1.17381	-0.311057	0.755757	RO	NS			OTU_1255	1.29353	-0.000464071	0.191419	-0.00242437	0.998066	RS	NS
OTU_2314	0.011785	-0.266877	1.17411	-0.227301	0.82019	RO	NS			OTU_1256	0.566412	-0.575494	0.478317	-1.20316	0.228913	RS	NS
OTU_2315	1279.65	-0.435735	0.272418	-1.59951	0.109707	RO	NS			OTU_1257	3.78255	-0.0295379	0.215411	-0.137123	0.890933	RS	NS
OTU_2316	1.46346	-0.214567	0.537434	-0.399243	0.689714	RO	NS			OTU_1258	0.149469	0.0885115	0.856389	0.103354	0.917682	RS	NS
OTU_2318	2.51015	0.448781	1.13664	0.394832	0.692967	RO	NS			OTU_1259	0.444927	-0.0601327	0.524252	-0.114702	0.908681	RS	NS
OTU_2319	0.474836	-0.64627	0.790878	-0.817155	0.41384	RO	NS			OTU_1260	0.349778	-0.130889	0.406132	-0.322281	0.74724	RS	NS
OTU_2321	0.0226265	-0.0668722	1.17455	-0.0569343	0.954597	RO	NS			OTU_1261	0.258033	-0.00880836	0.65206	-0.0135085	0.989222	RS	NS
OTU_2322	0.717569	-0.114025	0.591275	-0.192847	0.847079	RO	NS			OTU_1262	0.191421	-0.0499169	1.17532	-0.042471	0.966123	RS	NS
OTU_2323	1.25761	0.510477	0.471586	1.08247	0.279045	RO	NS			OTU_1263	0.318888	-0.485485	0.699589	-0.693958	0.487709	RS	NS
OTU_2324	0.291827	-0.793394	1.09772	-0.722768	0.469822	RO	NS			OTU_1264	0.186743	0.222744	0.759685	0.293206	0.769365	RS	NS
OTU_2325	0.554435	0.222482	0.399935	0.556295	0.578009	RO	NS			OTU_1265	0.305705	-0.42234	1.06305	-0.397292	0.691152	RS	NS
OTU_2326	0.552446	-0.414445	0.870555	-0.476071	0.634024	RO	NS			OTU_1266	0.270465	0.305432	0.629979	0.484828	0.627798	RS	NS
OTU_2327	0.0851209	-0.0979044	1.17406	-0.0833897	0.933542	RO	NS			OTU_1267	0.0290434	0.0775542	1.17634	0.0659284	0.947435	RS	NS
OTU_2329	0.0913605	-0.278674	1.02084	-0.272983	0.784866	RO	NS			OTU_1268	0.236922	-0.103542	0.536693	-0.192925	0.847017	RS	NS
OTU_2333	0.0490858	-0.323761	1.17397	-0.275784	0.782714	RO	NS			OTU_1269	0.0743287	0.014457	1.17633	0.0122899	0.990194	RS	NS
OTU_2335	0.0232506	-0.211622	1.17426	-0.180218	0.856981	RO	NS			OTU_1270	0.0958414	-0.140623	0.999267	-0.140726	0.888086	RS	NS
OTU_2336	0.00830109	-0.211622	1.17426	-0.180218	0.856981	RO	NS			OTU_1271	0.0825259	-0.311551	1.02179	-0.304909	0.760436	RS	NS
OTU_2338	0.0207451	-0.161175	1.17418	-0.137266	0.890821	RO	NS			OTU_1272	0.0443415	0.00231321	1.17635	0.00196643	0.998431	RS	NS
OTU_2342	107.385	0.384963	0.208592	1.84553	0.0649604	RO	NS			OTU_1273	0.132021	0.0443029	0.966242	0.0458507	0.963429	RS	NS
OTU_2343	350.76	-0.980575	0.44763	-2.19059	0.0284813	RO	NS			OTU_1274	0.0204406	-0.0974313	1.17642	-0.0828202	0.933994	RS	NS
OTU_2344	212.765	-0.484838	0.166875	-2.90539	0.00366793	RO	NS			OTU_1275	0.0533117	-0.0808116	1.17632	-0.0686985	0.94523	RS	NS
OTU_2345	199.121	0.994884	0.358849	2.77243	0.00556394	RO	NS			OTU_1276	0.016526	-0.0974313	1.17642	-0.0828202	0.933994	RS	NS
OTU_2347	0.61269	-0.0880036	0.68665	-0.128164	0.898019	RO	NS			OTU_1277	0.0153285	0.04824	1.17636	0.0410078	0.96729	RS	NS
OTU_2348	1.83467	0.590093	0.482472	1.22306	0.221307	RO	NS			OTU_1278	0.322476	0.0251034	0.744751	0.0337071	0.973111	RS	NS
OTU_2349	0.0793046	-0.615187	1.17305	-0.524433	0.599978	RO	NS			OTU_1280	0.021808	-0.0337081	1.17642	-0.0286532	0.977141	RS	NS
OTU_2350	5.34219	0.150994	0.233107	0.647747	0.517149	RO	NS			OTU_1281	0.0175062	-0.0903339	1.17646	-0.0767845	0.938795	RS	NS
OTU_2351	4.67033	-0.0217941	0.554487	-0.0393049	0.968647	RO	NS			OTU_1283	25.6448	-0.0145976	0.114749	-0.127213	0.898772	RS	NS
OTU_2352	1.41702	1.01287	0.976003	1.03777	0.299377	RO	NS			OTU_1284	10.2127	-0.0288391	0.165773	-0.173967	0.861891	RS	NS
OTU_2353	0.254624	-0.529617	0.960691	-0.551288	0.581436	RO	NS			OTU_1285	13.8422	-0.0891764	0.171991	-0.518495	0.604113	RS	NS
OTU_2354	0.528573	-0.0448097	0.52605	-0.0851814	0.932117	RO	NS			OTU_1286	7.88757	0.263908	0.121514	2.17183	0.0298687	RS	NS
OTU_2356	0.0424739	-0.251622	1.17408	-0.214313	0.830303	RO	NS			OTU_1287	3.96801	0.0964388	0.176603	0.546078	0.585012	RS	NS
OTU_2358	0.270867	0.249187	0.482996	0.51592	0.605911	RO	NS			OTU_1288	1.68227	0.0981548	0.18482	0.531082	0.595362	RS	NS
OTU_2359	0.0237914	-0.39769	1.1737	-0.338835	0.734734	RO	NS			OTU_1289	1.8165	0.208203	0.525376	0.396295	0.691888	RS	NS
OTU_2361	0.0165184	-0.178546	1.17421	-0.152057	0.879142	RO	NS			OTU_1290	1.26636	-0.231229	0.287151	-0.805252	0.420674	RS	NS
OTU_2364	0.0134421	-0.195162	1.17423	-0.166204	0.867997	RO	NS			OTU_1291	0.367443	-0.0399048	0.641083	-0.062246	0.950367	RS	NS
OTU_2367	0.0547159	-0.48504	1.17342	-0.413357	0.679345	RO	NS			OTU_1293	1.18441	-0.559465	0.794745	-0.703955	0.481461	RS	NS
OTU_2369	0.266229	-0.313648	1.17347	-0.267283	0.789252	RO	NS			OTU_1294	0.873307	0.53264	0.48163	1.10591	0.268765	RS	NS
OTU_2380	155.834	-0.41307	0.180789	-2.28483	0.0223231	RO	NS			OTU_1295	0.563769	0.489803	0.675375	0.725232	0.46831	RS	NS
OTU_2381	897.696	-0.553649	0.40451	-1.36869	0.171096	RO	NS			OTU_1296	0.289453	-0.49905	1.17416	-0.425028	0.670816	RS	NS
OTU_2382	9.46506	-0.458524	0.304014	-1.50824	0.131494	RO	NS			OTU_1297	0.336543	-0.364082	0.476343	-0.764326	0.444673	RS	NS
OTU_2383	133.516	-0.390207	0.251303	-1.55273	0.120487	RO	NS			OTU_1298	0.157589	-0.31715	1.17549	-0.269802	0.787313	RS	NS
OTU_2384	158.733	1.1826	0.583898	2.02536	0.0428306	RO	NS			OTU_1299	0.417525	0.4771	0.476477	1.00131	0.316678	RS	NS
OTU_2385	9.76052	-0.315365	0.438041	-0.719945	0.471559	RO	NS			OTU_1300	0.389827	-0.100488	0.506877	-0.198249	0.84285	RS	NS
OTU_2386	2.00131	-0.351629	0.520485	-0.675579	0.499308	RO	NS			OTU_1301	0.442521	-0.129007	0.380147	-0.339362	0.734337	RS	NS
OTU_2387	19.7535	-0.789624	0.434668	-1.81661	0.0692762	RO	NS			OTU_1302	0.123408	0.167799	1.13025	0.148461	0.881979	RS	NS
OTU_2388	0.483281	-0.425173	1.17224	-0.362702	0.716828	RO	NS			OTU_1304	0.0792037	-0.017381	1.17637	-0.0147752	0.988212	RS	NS
OTU_2389	0.0266987	-0.323761	1.17397	-0.275784	0.782714	RO	NS			OTU_1305	0.104791	-0.270387	1.14014	-0.237153	0.812538	RS	NS
OTU_2390	0.167706	-0.240324	0.964227	-0.24924	0.803175	RO	NS			OTU_1306	0.0436533	-0.082025	1.17641	-0.0697249	0.944413	RS	NS
OTU_2393	0.340106	-0.681155	1.15311	-0.59071	0.554714	RO	NS			OTU_1307	0.0521884	-0.146696	1.17616	-0.124725	0.900741	RS	NS
OTU_2394	2.6659	-0.541135	0.435546	-1.24243	0.214078	RO	NS			OTU_1309	0.0341237	-0.121304	1.17624	-0.103128	0.917861	RS	NS
OTU_2396	0.0313226	-0.337802	1.17398	-0.28774	0.773546	RO	NS			OTU_1310	0.0182606	-0.0974313	1.17642	-0.0828202	0.933994	RS	NS
OTU_2397	0.00957072	-0.313617	1.17401	-0.267134	0.789366	RO	NS			OTU_1311	0.0190128	-0.0337081	1.17642	-0.0286532	0.977141	RS	NS
OTU_2399	0.0127671	-0.277966	1.17402	-0.236764	0.81284	RO	NS			OTU_1312	0.0144642	-0.168816	1.17624	-0.143522	0.885878	RS	NS
OTU_2402	0.0779387	-0.0773475	1.17387	-0.0658912	0.947464	RO	NS			OTU_1313	0.0170618	-0.0974313	1.17642	-0.0828202	0.933994	RS	NS
OTU_2404	0.118476	0.0412601	1.1741	0.0351418	0.971967	RO	NS			OTU_1314	0.0210222	-0.0974313	1.17642	-0.0828202	0.933994	RS	NS
OTU_2408	0.0313226	-0.337802	1.17398	-0.28774	0.773546	RO	NS			OTU_1315	0.016526	-0.0974313	1.17642	-0.0828202	0.933994	RS	NS
OTU_2409	0.151289	-0.0519275	1.17363	-0.044245	0.964709	RO	NS			OTU_1317	0.0317342	-0.0486587	1.17644	-0.0413611	0.967008	RS	NS
OTU_2415	0.0240787	-0.00248919	1.17458	-0.00211921	0.998309	RO	NS			OTU_1318	0.112594	0.00250923	0.98676	0.0025429	0.997971	RS	NS
OTU_2418	0.0198261	-0.365122	1.17381	-0.311057	0.755757	RO	NS			OTU_1319	7.29792	-0.128697	0.14832	-0.8677	0.385558	RS	NS
OTU_2420	0.0166709	-0.266876	1.17411	-0.227301	0.82019	RO	NS			OTU_1321	2.71585	-0.153863	0.214983	-0.715696	0.474179	RS	NS
OTU_2421	0.0181432	-0.266876	1.17411	-0.227301	0.82019	RO	NS			OTU_1322	3.06554	-0.175449	0.411167	-0.426711	0.66959	RS	NS
OTU_2422	98.6909	-0.477658	0.176129	-2.71197	0.00668849	RO	NS			OTU_1323	0.454154	0.171355	0.538924	0.317958	0.750517	RS	NS
OTU_2423	270.594	-0.469952	0.158861	-2.95827	0.00309376	RO	NS			OTU_1324	2.33202	-0.222519	0.171763	-1.2955	0.195149	RS	NS
OTU_2424	33.1001	0.123036	0.215703	0.570396	0.568409	RO	NS			OTU_1325	2.30538	-0.0596571	0.199534	-0.298982	0.764954	RS	NS
OTU_2426	0.244524	-0.158991	0.535938	-0.29666	0.766726	RO	NS			OTU_1327	1.27449	0.155929	0.257963	0.604463	0.545536	RS	NS
OTU_2427	0.061919	-0.092369	1.17405	-0.0786757	0.937291	RO	NS			OTU_1328	0.75882	0.343939	0.297823	1.15484	0.248154	RS	NS
OTU_2428	0.168911	-0.198406	0.810191	-0.244889	0.806543	RO	NS			OTU_1329	1.79966	0.0778291	0.28819	0.270061	0.787113	RS	NS
OTU_2429	0.0614753	-0.557753	1.1732	-0.475411	0.634494	RO	NS			OTU_1330	0.739426	0.108372	0.296283	0.365772	0.714535	RS	NS
OTU_2430	0.0338838	-0.26384	1.17385	-0.224766	0.822162	RO	NS			OTU_1331	0.735421	-0.053998	0.321819	-0.16779	0.866749	RS	NS
OTU_2431	0.447332	-0.564317	1.09641	-0.514697	0.606765	RO	NS			OTU_1332	0.611926	0.139124	0.375451	0.370553	0.710971	RS	NS
OTU_2432	0.102552	-0.351377	1.15502	-0.304218	0.760962	RO	NS			OTU_1333	0.935506	0.376438	0.402529	0.935184	0.349694	RS	NS
OTU_2433	0.257335	-0.249601	0.73298	-0.340529	0.733458	RO	NS			OTU_1334	0.864416	-0.0478972	0.314971	-0.152068	0.879133	RS	NS
OTU_2434	0.0309571	-0.155972	1.17441	-0.132809	0.894345	RO	NS			OTU_1335	0.291231	-0.127452	0.431355	-0.295469	0.767636	RS	NS
OTU_2444	0.307426	-0.306568	1.17382	-0.261172	0.79396	RO	NS			OTU_1336	0.363717	-0.101592	0.440099	-0.230838	0.817441	RS	NS
OTU_2446	0.0225021	-0.293329	1.17391	-0.249873	0.802686	RO	NS			OTU_1337	0.113642	-0.238013	1.15274	-0.206475	0.83642	RS	NS
OTU_2447	0.0252741	-0.0668722	1.17455	-0.0569344	0.954597	RO	NS			OTU_1338	0.173318	-0.359167	0.625903	-0.573839	0.566077	RS	NS
OTU_2451	23.3317	-0.221124	0.222676	-0.993031	0.320695	RO	NS			OTU_1339	0.283015	-0.318679	0.844359	-0.377421	0.70586	RS	NS
OTU_2453	0.176577	-0.849412	1.17227	-0.724588	0.468705	RO	NS			OTU_1340	0.268855	-0.250212	0.5091	-0.491478	0.623088	RS	NS
OTU_2454	0.0351771	-0.263251	1.17389	-0.224255	0.822559	RO	NS			OTU_1341	0.143805	-0.256187	0.77034	-0.332563	0.739464	RS	NS
OTU_2455	0.129794	-0.744329	1.17273	-0.634698	0.525626	RO	NS			OTU_1342	0.165882	0.0321246	0.753292	0.0426457	0.965984	RS	NS
OTU_2457	0.577072	0.48187	0.78401	0.614623	0.538804	RO	NS			OTU_1343	0.179721	0.354727	0.955983	0.37106	0.710593	RS	NS
OTU_2458	0.0287122	-0.422794	1.17361	-0.360249	0.718661	RO	NS			OTU_1344	0.0582451	-0.0428938	1.17635	-0.0364636	0.970913	RS	NS
OTU_2461	0.288127	-0.672268	1.14433	-0.58748	0.556882	RO	NS			OTU_1345	0.0885627	-0.109203	1.17607	-0.092854	0.92602	RS	NS
OTU_2464	0.0250331	-0.145797	1.17416	-0.124172	0.901179	RO	NS			OTU_1346	0.0366032	-0.082025	1.17641	-0.0697249	0.944413	RS	NS
OTU_2466	0.00567205	-0.218584	1.17426	-0.186146	0.85233	RO	NS			OTU_1347	0.0302562	0.134307	1.1763	0.114178	0.909097	RS	NS
OTU_2467	0.0167078	-0.0590811	1.17456	-0.0503006	0.959883	RO	NS			OTU_1348	0.0184208	-0.0974313	1.17642	-0.0828202	0.933994	RS	NS
OTU_2470	0.0120394	-0.111354	1.17448	-0.0948117	0.924464	RO	NS			OTU_1349	0.0167992	-0.168816	1.17624	-0.143522	0.885878	RS	NS
OTU_2472	0.0167078	-0.0590811	1.17456	-0.0503006	0.959883	RO	NS			OTU_1350	0.0158692	0.0286262	1.17638	0.0243342	0.980586	RS	NS
OTU_2474	0.0606087	-0.227453	1.17427	-0.193697	0.846413	RO	NS			OTU_1351	0.0247386	-0.0903339	1.17646	-0.0767845	0.938795	RS	NS
OTU_2478	0.010994	-0.211622	1.17426	-0.180218	0.856981	RO	NS			OTU_1352	0.0175062	-0.0903339	1.17646	-0.0767845	0.938795	RS	NS
OTU_2481	0.00567205	-0.218584	1.17426	-0.186146	0.85233	RO	NS			OTU_1353	304.41	-0.0552185	0.0563842	-0.979325	0.327419	RS	NS
OTU_2485	0.0142801	-0.381146	1.17384	-0.324699	0.745409	RO	NS			OTU_1354	4.26447	0.0270516	0.143154	0.188968	0.850118	RS	NS
OTU_2488	49.6822	-0.148263	0.219258	-0.676202	0.498913	RO	NS			OTU_1355	2.07539	0.0845616	0.403726	0.209453	0.834095	RS	NS
OTU_2489	20.7714	-0.495475	0.207504	-2.38778	0.0169504	RO	NS			OTU_1356	2.17145	0.0763926	0.204851	0.372919	0.709209	RS	NS
OTU_2490	0.534465	-0.236784	0.723241	-0.327393	0.74337	RO	NS			OTU_1357	1.7484	0.199749	0.300403	0.664938	0.50609	RS	NS
OTU_2492	207.309	-0.642649	0.175616	-3.65941	0.000252798	RO	Depleted			OTU_1358	8.64721	0.0897395	0.12913	0.694952	0.487085	RS	NS
OTU_2493	0.586199	0.0904987	0.621341	0.145651	0.884197	RO	NS			OTU_1359	1.13339	-0.0382698	0.236844	-0.161582	0.871635	RS	NS
OTU_2494	0.129148	0.0156895	1.15226	0.0136162	0.989136	RO	NS			OTU_1360	1.43457	0.442093	0.299979	1.47375	0.14055	RS	NS
OTU_2495	0.301676	-0.868653	0.731884	-1.18687	0.235278	RO	NS			OTU_1361	0.4158	0.552605	0.82776	0.667591	0.504395	RS	NS
OTU_2497	2.98847	-0.195535	0.476676	-0.410206	0.681655	RO	NS			OTU_1362	1.74339	-0.430291	0.513832	-0.837415	0.402359	RS	NS
OTU_2498	0.0358637	-0.178546	1.17421	-0.152057	0.879142	RO	NS			OTU_1363	1.13227	0.541187	0.455842	1.18723	0.235139	RS	NS
OTU_2500	0.0261593	-0.23606	1.17406	-0.201064	0.840649	RO	NS			OTU_1364	0.816094	0.185375	0.237363	0.780976	0.434816	RS	NS
OTU_2503	0.0207451	-0.161175	1.17418	-0.137266	0.890821	RO	NS			OTU_1365	0.208441	0.178102	0.778199	0.228864	0.818975	RS	NS
OTU_2504	0.0562271	-0.142921	1.17372	-0.121768	0.903083	RO	NS			OTU_1366	0.466168	0.123264	0.379815	0.324537	0.745531	RS	NS
OTU_2505	0.116068	-0.157061	1.17404	-0.133778	0.893578	RO	NS			OTU_1367	0.142437	0.0914479	0.875039	0.104507	0.916767	RS	NS
OTU_2506	0.0516551	-0.390097	1.17358	-0.332401	0.739587	RO	NS			OTU_1368	0.328655	-0.145135	0.50186	-0.289193	0.772434	RS	NS
OTU_2507	2.65616	-0.405583	1.17316	-0.345719	0.729554	RO	NS			OTU_1369	0.515158	-0.268261	0.494986	-0.541957	0.587848	RS	NS
OTU_2508	0.0472975	-0.155972	1.17441	-0.132809	0.894345	RO	NS			OTU_1371	0.446915	0.020441	0.47099	0.0434001	0.965383	RS	NS
OTU_2509	0.673506	-0.831958	0.651464	-1.27706	0.201582	RO	NS			OTU_1372	0.821754	0.105986	0.564944	0.187604	0.851187	RS	NS
OTU_2510	0.0586271	-0.263207	1.17384	-0.224226	0.822581	RO	NS			OTU_1373	0.150051	-0.0744297	0.699097	-0.106465	0.915213	RS	NS
OTU_2511	0.0544973	-0.211622	1.17426	-0.180218	0.856981	RO	NS			OTU_1375	0.0487606	0.0190979	1.17634	0.016235	0.987047	RS	NS
OTU_2512	0.118879	-0.251622	1.17408	-0.214313	0.830303	RO	NS			OTU_1376	0.017032	-0.0337081	1.17642	-0.0286532	0.977141	RS	NS
OTU_2516	0.0399119	-0.13695	1.17406	-0.116646	0.90714	RO	NS			OTU_1377	0.0522335	-0.0666175	1.1764	-0.0566282	0.954841	RS	NS
OTU_2517	0.0264783	-0.162477	1.17414	-0.13838	0.88994	RO	NS			OTU_1380	0.0194752	-0.135657	1.17639	-0.115316	0.908195	RS	NS
OTU_2522	0.010749	-0.32143	1.17398	-0.273796	0.784241	RO	NS			OTU_1381	0.0210222	-0.0974313	1.17642	-0.0828202	0.933994	RS	NS
OTU_2523	0.0120394	-0.111354	1.17448	-0.0948117	0.924464	RO	NS			OTU_1382	0.0204406	-0.0974313	1.17642	-0.0828202	0.933994	RS	NS
OTU_2525	4.82231	0.229672	0.2872	0.799692	0.423889	RO	NS			OTU_1383	5.11051	0.291161	0.187324	1.55432	0.120109	RS	NS
OTU_2527	0.0415214	-0.191538	1.17411	-0.163136	0.870412	RO	NS			OTU_1384	8.00818	-1.6503	0.606788	-2.71974	0.0065334	RS	NS
OTU_2528	70.2577	-0.713333	0.184914	-3.85765	0.000114481	RO	Depleted			OTU_1385	4.63513	-0.0371203	0.332196	-0.111742	0.911028	RS	NS
OTU_2529	0.214498	-0.442701	1.17347	-0.377258	0.705982	RO	NS			OTU_1386	7.92784	0.119044	0.163077	0.72999	0.465396	RS	NS
OTU_2530	0.0717942	-0.270302	1.17362	-0.230314	0.817848	RO	NS			OTU_1387	1.66093	0.091977	0.326346	0.281839	0.778067	RS	NS
OTU_2531	0.304308	-0.125863	0.95757	-0.13144	0.895427	RO	NS			OTU_1388	1.86377	-0.498271	0.349876	-1.42414	0.154407	RS	NS
OTU_2532	0.0220722	-0.365122	1.17381	-0.311057	0.755757	RO	NS			OTU_1389	0.955313	-0.0596904	0.259827	-0.229732	0.8183	RS	NS
OTU_2534	174.044	-0.869027	0.29187	-2.97744	0.00290666	RO	NS			OTU_1390	0.425552	0.228096	0.940335	0.242569	0.80834	RS	NS
OTU_2535	0.0286035	0.0289519	1.17458	0.0246488	0.980335	RO	NS			OTU_1391	0.427073	0.418045	0.443099	0.943456	0.345448	RS	NS
OTU_2536	0.527784	-0.541042	1.11574	-0.484917	0.627735	RO	NS			OTU_1392	10.5033	-0.471998	0.242947	-1.9428	0.0520402	RS	NS
OTU_2537	0.16819	-0.0422306	1.09927	-0.0384171	0.969355	RO	NS			OTU_1393	0.652918	-0.938237	0.457184	-2.05221	0.0401495	RS	NS
OTU_2538	0.0503307	-0.282408	1.17413	-0.240525	0.809924	RO	NS			OTU_1394	0.474323	-0.447861	0.492718	-0.90896	0.363371	RS	NS
OTU_2540	0.0144523	-0.280095	1.17401	-0.23858	0.811431	RO	NS			OTU_1395	0.354701	-0.455289	0.527134	-0.863707	0.387749	RS	NS
OTU_2542	0.766525	-0.523227	0.606189	-0.863142	0.388059	RO	NS			OTU_1396	0.238201	-0.117515	0.580147	-0.202561	0.839478	RS	NS
OTU_2543	0.814834	0.173852	0.548264	0.317096	0.751171	RO	NS			OTU_1397	0.193749	-0.0256474	0.631179	-0.0406341	0.967588	RS	NS
OTU_2544	0.108995	-0.178546	1.17421	-0.152057	0.879142	RO	NS			OTU_1398	0.0860562	-0.243203	1.17547	-0.206897	0.83609	RS	NS
OTU_2547	0.119565	-0.722996	1.1728	-0.616468	0.537586	RO	NS			OTU_1399	0.0467486	-0.174036	1.17599	-0.14799	0.88235	RS	NS
OTU_2549	0.158461	-0.455115	1.11455	-0.40834	0.683024	RO	NS			OTU_1400	0.13674	-0.359385	1.17526	-0.305792	0.759763	RS	NS
OTU_2550	0.329242	0.0487257	0.957069	0.0509114	0.959396	RO	NS			OTU_1401	0.0157203	-0.0903339	1.17646	-0.0767845	0.938795	RS	NS
OTU_2553	0.0237914	-0.39769	1.1737	-0.338835	0.734734	RO	NS			OTU_1402	0.0324194	-0.082025	1.17641	-0.0697249	0.944413	RS	NS
OTU_2554	0.0126371	-0.155972	1.17441	-0.132809	0.894345	RO	NS			OTU_1403	0.040139	0.13603	1.17629	0.115643	0.907936	RS	NS
OTU_2559	7.89249	-0.257582	0.258061	-0.998144	0.31821	RO	NS			OTU_1404	0.0930367	-0.082025	1.17641	-0.0697249	0.944413	RS	NS
OTU_2560	198.046	-0.428871	0.199442	-2.15036	0.031527	RO	NS			OTU_1405	0.0246823	-0.00710444	1.17641	-0.00603908	0.995182	RS	NS
OTU_2561	272.677	-0.229542	0.347616	-0.660332	0.50904	RO	NS			OTU_1406	0.0190128	-0.0337081	1.17642	-0.0286532	0.977141	RS	NS
OTU_2562	241.917	-0.820266	0.2346	-3.49644	0.00047151	RO	Depleted			OTU_1407	0.0271947	-0.0903339	1.17646	-0.0767845	0.938795	RS	NS
OTU_2563	2.66737	0.572457	0.449302	1.2741	0.202627	RO	NS			OTU_1409	0.0200695	0.0286262	1.17638	0.0243342	0.980586	RS	NS
OTU_2564	143.9	-0.223554	0.20183	-1.10763	0.26802	RO	NS			OTU_1410	700.376	-0.0207199	0.0652265	-0.317661	0.750742	RS	NS
OTU_2565	3.23391	-0.00498236	0.312836	-0.0159264	0.987293	RO	NS			OTU_1411	42.7788	-0.00879217	0.146266	-0.060111	0.952067	RS	NS
OTU_2566	0.612871	-0.351514	0.883055	-0.398066	0.690582	RO	NS			OTU_1412	34.722	0.125738	0.0859093	1.46361	0.143299	RS	NS
OTU_2567	34.2038	-3.16933	1.16983	-2.70922	0.00674426	RO	NS			OTU_1413	1.04329	-0.65378	0.476161	-1.37302	0.169745	RS	NS
OTU_2569	1.64998	-0.393085	0.522423	-0.752426	0.451795	RO	NS			OTU_1414	5.52593	-0.0524273	0.138258	-0.379199	0.70454	RS	NS
OTU_2570	4.04783	0.660424	0.414807	1.59212	0.111357	RO	NS			OTU_1415	2.71305	0.0180318	0.526116	0.0342734	0.972659	RS	NS
OTU_2571	0.876187	-0.213859	0.802656	-0.26644	0.789901	RO	NS			OTU_1416	2.87499	0.104006	0.219801	0.473181	0.636084	RS	NS
OTU_2572	0.00831884	-0.200194	1.17435	-0.170472	0.864639	RO	NS			OTU_1417	4.82345	-0.153209	0.358699	-0.427124	0.669289	RS	NS
OTU_2573	0.00567205	-0.218584	1.17426	-0.186146	0.85233	RO	NS			OTU_1418	1.13648	0.794811	0.783824	1.01402	0.310575	RS	NS
OTU_2576	0.0118957	-0.328811	1.17395	-0.28009	0.779408	RO	NS			OTU_1419	0.7494	-0.341469	0.469799	-0.726841	0.467323	RS	NS
OTU_2588	0.0699566	-0.29126	1.17379	-0.248136	0.804029	RO	NS			OTU_1420	2.07393	0.0954374	0.268748	0.355118	0.722501	RS	NS
OTU_2593	0.0104204	-0.271624	1.17407	-0.231352	0.817041	RO	NS			OTU_1421	14.9057	0.272111	0.315948	0.861253	0.389099	RS	NS
OTU_2596	0.65394	0.332646	0.797172	0.417283	0.676471	RO	NS			OTU_1423	1231.67	-0.145265	0.107908	-1.34619	0.178243	RS	NS
OTU_2597	510.137	-0.382248	0.21644	-1.76607	0.0773839	RO	NS			OTU_1424	1.37668	-0.0338687	0.21093	-0.160568	0.872433	RS	NS
OTU_2598	0.333578	-0.487001	0.661811	-0.735861	0.461815	RO	NS			OTU_1425	0.493677	-0.548533	0.486296	-1.12798	0.259328	RS	NS
OTU_2599	0.156364	-0.263749	0.982746	-0.26838	0.788407	RO	NS			OTU_1426	0.370592	-0.0915427	0.470209	-0.194685	0.845639	RS	NS
OTU_2600	44.2576	-0.483469	0.178997	-2.70098	0.00691348	RO	NS			OTU_1427	0.268934	-0.0302754	0.560542	-0.054011	0.956926	RS	NS
OTU_2603	0.595116	-0.379741	1.03341	-0.367466	0.713272	RO	NS			OTU_1428	0.101478	-0.00793947	1.17601	-0.00675118	0.994613	RS	NS
OTU_2604	8.47508	0.0517198	0.464004	0.111464	0.911248	RO	NS			OTU_1429	0.064694	0.0261058	1.17634	0.0221924	0.982294	RS	NS
OTU_2605	0.247293	0.492725	1.17335	0.419929	0.674537	RO	NS			OTU_1430	0.108506	-0.0198824	1.17629	-0.0169026	0.986514	RS	NS
OTU_2606	9.37588	-2.35562	0.691556	-3.40626	0.000658595	RO	Depleted			OTU_1431	0.0661246	-0.0741364	1.17625	-0.063028	0.949744	RS	NS
OTU_2607	2.03126	-1.39126	0.689172	-2.01874	0.0435145	RO	NS			OTU_1432	0.0328347	0.033641	1.17635	0.0285977	0.977185	RS	NS
OTU_2608	0.0127293	-0.211622	1.17426	-0.180218	0.856981	RO	NS			OTU_1433	0.0169789	0.0590527	1.17635	0.0501998	0.959963	RS	NS
OTU_2610	0.112488	-0.384477	1.17297	-0.32778	0.743078	RO	NS			OTU_1434	0.0929127	-0.0737261	1.15031	-0.0640925	0.948897	RS	NS
OTU_2613	0.337899	-0.49238	0.861039	-0.571844	0.567427	RO	NS			OTU_1435	0.0207523	-0.0903339	1.17646	-0.0767845	0.938795	RS	NS
OTU_2614	0.0772817	-0.127309	1.17413	-0.108429	0.913656	RO	NS			OTU_1436	0.0182606	-0.0974313	1.17642	-0.0828202	0.933994	RS	NS
OTU_2617	0.0153688	-0.350103	1.17386	-0.298248	0.765514	RO	NS			OTU_1437	0.0144642	-0.168816	1.17624	-0.143522	0.885878	RS	NS
OTU_2619	0.624757	-0.383997	0.549966	-0.698219	0.48504	RO	NS			OTU_1438	0.0200695	0.0286262	1.17638	0.0243342	0.980586	RS	NS
OTU_2622	0.28784	-0.226383	0.9618	-0.235374	0.813918	RO	NS			OTU_1441	364.225	0.0430523	0.0647461	0.66494	0.506089	RS	NS
OTU_2623	0.106131	-0.446617	1.15159	-0.387827	0.698144	RO	NS			OTU_1442	47.0842	-0.0623704	0.202	-0.308764	0.757501	RS	NS
OTU_2626	0.00510015	-0.22104	1.17427	-0.188237	0.850691	RO	NS			OTU_1443	14.4059	-0.130473	0.217966	-0.598593	0.549444	RS	NS
OTU_2628	0.0553203	-0.0535248	1.17397	-0.0455931	0.963635	RO	NS			OTU_1444	0.335197	-0.00435272	0.820706	-0.00530363	0.995768	RS	NS
OTU_2632	0.0127293	-0.211622	1.17426	-0.180218	0.856981	RO	NS			OTU_1445	6.38326	0.212967	0.321089	0.663265	0.507161	RS	NS
OTU_2633	0.0768071	-0.54208	1.17313	-0.462079	0.644025	RO	NS			OTU_1446	0.695066	0.498445	0.464801	1.07238	0.283547	RS	NS
OTU_2638	0.704812	0.716057	0.803799	0.890841	0.373014	RO	NS			OTU_1447	0.644469	0.0793132	0.358997	0.22093	0.825147	RS	NS
OTU_2639	0.121723	0.00884122	1.17442	0.00752815	0.993993	RO	NS			OTU_1448	1.14504	-0.566703	0.583218	-0.971682	0.331209	RS	NS
OTU_2640	26.9877	-0.54318	0.270322	-2.00938	0.0444967	RO	NS			OTU_1450	0.248652	0.19126	0.600975	0.31825	0.750295	RS	NS
OTU_2641	0.0826809	-0.350307	1.17379	-0.298442	0.765366	RO	NS			OTU_1451	0.0168129	-0.0843834	1.17647	-0.0717258	0.94282	RS	NS
OTU_2643	0.923439	-0.672971	0.4953	-1.35871	0.174237	RO	NS			OTU_1452	0.227422	0.105246	0.685479	0.153537	0.877975	RS	NS
OTU_2645	0.700544	0.147324	0.770242	0.191269	0.848315	RO	NS			OTU_1453	0.0818715	-0.160313	1.17591	-0.136331	0.89156	RS	NS
OTU_2647	0.407481	-0.730223	0.737405	-0.99026	0.322047	RO	NS			OTU_1454	0.18506	0.0465607	0.762753	0.061043	0.951325	RS	NS
OTU_2649	1.79534	0.387698	0.34573	1.12139	0.262121	RO	NS			OTU_1455	0.121411	-0.258867	0.871639	-0.296989	0.766475	RS	NS
OTU_2650	4.46218	-2.30125	0.721399	-3.18998	0.00142282	RO	Depleted			OTU_1456	0.187645	-0.192834	1.17566	-0.164022	0.869714	RS	NS
OTU_2651	0.0201798	-0.200194	1.17435	-0.170472	0.864639	RO	NS			OTU_1457	0.130524	-0.177209	0.868619	-0.204012	0.838344	RS	NS
OTU_2654	0.0211628	-0.189843	1.17423	-0.161675	0.871562	RO	NS			OTU_1458	0.0556168	-0.105583	1.17624	-0.0897628	0.928476	RS	NS
OTU_2655	0.197583	-0.619922	1.17229	-0.528813	0.596935	RO	NS			OTU_1459	0.068961	-0.440243	1.17511	-0.374641	0.707928	RS	NS
OTU_2656	0.0378394	-0.144975	1.17416	-0.123472	0.901734	RO	NS			OTU_1461	0.037324	-0.183884	1.1761	-0.156351	0.875756	RS	NS
OTU_2658	0.408762	0.29801	0.616087	0.483714	0.628589	RO	NS			OTU_1462	0.0325137	-0.0891225	1.17637	-0.0757606	0.93961	RS	NS
OTU_2659	0.0181432	-0.266876	1.17411	-0.227301	0.82019	RO	NS			OTU_1463	0.0231476	-0.0974313	1.17642	-0.0828202	0.933994	RS	NS
OTU_2661	0.648239	-0.836803	1.05045	-0.796614	0.425675	RO	NS			OTU_1464	0.0196536	0.0286262	1.17638	0.0243342	0.980586	RS	NS
OTU_2663	0.00510015	-0.22104	1.17427	-0.188237	0.850691	RO	NS			OTU_1466	4.9799	0.0144104	0.731411	0.0197022	0.984281	RS	NS
OTU_2670	0.0504525	-0.108429	1.17408	-0.0923524	0.926418	RO	NS			OTU_1467	32.5631	-0.0377546	0.0828041	-0.455951	0.648425	RS	NS
OTU_2674	0.0352368	-0.28398	1.17398	-0.241896	0.808861	RO	NS			OTU_1468	18.9373	-0.0293329	0.0910691	-0.322095	0.747381	RS	NS
OTU_2675	0.0140086	-0.341945	1.1739	-0.291291	0.770829	RO	NS			OTU_1469	8.38036	0.191829	0.150434	1.27518	0.202247	RS	NS
OTU_2676	0.0142801	-0.381146	1.17384	-0.324699	0.745409	RO	NS			OTU_1470	3.9625	-0.480553	0.392131	-1.22549	0.22039	RS	NS
OTU_2677	0.0120394	-0.111354	1.17448	-0.0948117	0.924464	RO	NS			OTU_1471	1.99218	-0.0189263	0.165012	-0.114696	0.908686	RS	NS
OTU_2682	0.0126131	-0.211622	1.17426	-0.180218	0.856981	RO	NS			OTU_1472	0.0484036	-0.312084	1.17552	-0.265485	0.790636	RS	NS
OTU_2684	4175.94	-1.0641	0.38005	-2.79989	0.00511196	RO	NS			OTU_1473	1.48133	0.0457452	0.259162	0.176512	0.859892	RS	NS
OTU_2685	1.25046	0.165907	0.359093	0.462016	0.64407	RO	NS			OTU_1474	0.844737	0.197414	0.305626	0.645934	0.518322	RS	NS
OTU_2686	2.90821	-1.99429	0.908445	-2.19528	0.0281438	RO	NS			OTU_1476	0.352987	0.135932	0.434635	0.31275	0.754471	RS	NS
OTU_2687	0.223147	-0.664069	1.17259	-0.566325	0.571173	RO	NS			OTU_1477	0.690089	-0.0556384	0.368156	-0.151127	0.879875	RS	NS
OTU_2688	13.7005	-1.41816	0.645666	-2.19644	0.0280606	RO	NS			OTU_1478	0.669406	-0.27873	0.509543	-0.54702	0.584365	RS	NS
OTU_2689	0.191996	-0.517307	0.989051	-0.523034	0.600951	RO	NS			OTU_1479	8.3158	-0.0110638	0.257803	-0.0429158	0.965769	RS	NS
OTU_2690	153.908	0.30901	0.294522	1.04919	0.29409	RO	NS			OTU_1480	0.726767	-0.314023	0.623767	-0.50343	0.614662	RS	NS
OTU_2691	0.372263	0.504481	1.17363	0.429848	0.667306	RO	NS			OTU_1481	0.171077	-0.0272065	0.710715	-0.0382805	0.969464	RS	NS
OTU_2692	8.71402	-0.149253	0.396128	-0.37678	0.706337	RO	NS			OTU_1482	0.236894	-0.0875285	0.96504	-0.0906994	0.927731	RS	NS
OTU_2693	10.1588	-8.56529	1.16888	-7.32776	2.34032e-13	RO	Depleted			OTU_1483	0.0952977	0.0350763	1.00324	0.034963	0.972109	RS	NS
OTU_2694	0.344245	-0.0656419	0.616597	-0.106458	0.915219	RO	NS			OTU_1484	0.123348	-0.0877294	0.868006	-0.10107	0.919495	RS	NS
OTU_2695	1.15939	-0.676485	0.857235	-0.789148	0.430026	RO	NS			OTU_1485	0.192567	0.0389019	0.688637	0.0564911	0.954951	RS	NS
OTU_2696	0.70753	-0.372619	0.680346	-0.54769	0.583904	RO	NS			OTU_1486	0.0411819	0.0435802	1.17636	0.0370466	0.970448	RS	NS
OTU_2697	0.0544973	-0.211622	1.17426	-0.180218	0.856981	RO	NS			OTU_1487	0.10964	0.1233	0.988885	0.124686	0.900772	RS	NS
OTU_2698	0.200221	0.240126	0.999908	0.240148	0.810215	RO	NS			OTU_1488	0.0897213	0.24931	1.17599	0.212	0.832107	RS	NS
OTU_2699	0.413734	-0.638593	1.10807	-0.576311	0.564405	RO	NS			OTU_1489	0.149974	0.189395	0.958843	0.197525	0.843417	RS	NS
OTU_2703	0.0404738	-0.190714	1.1741	-0.162433	0.870965	RO	NS			OTU_1490	0.0687213	-0.192961	1.17586	-0.164102	0.869651	RS	NS
OTU_2704	0.0190987	-0.195162	1.17423	-0.166204	0.867997	RO	NS			OTU_1491	0.100262	0.0234174	1.00036	0.0234091	0.981324	RS	NS
OTU_2705	0.442706	-0.632624	0.598603	-1.05683	0.290588	RO	NS			OTU_1492	0.0919434	-0.19283	1.17226	-0.164494	0.869342	RS	NS
OTU_2707	12665.1	-0.669886	0.344097	-1.9468	0.0515593	RO	NS			OTU_1493	0.0247386	-0.0903339	1.17646	-0.0767845	0.938795	RS	NS
OTU_2708	0.00957072	-0.313617	1.17401	-0.267134	0.789366	RO	NS			OTU_1494	0.0595893	0.00202201	1.17638	0.00171883	0.998629	RS	NS
OTU_2709	0.147795	-0.293329	1.17391	-0.249873	0.802686	RO	NS			OTU_1495	0.0215152	-0.0486587	1.17644	-0.0413611	0.967008	RS	NS
OTU_2712	0.0201798	-0.200194	1.17435	-0.170472	0.864639	RO	NS			OTU_1496	0.0896197	-0.214891	1.17586	-0.182752	0.854993	RS	NS
OTU_2715	2.30306	-0.156539	0.384483	-0.407141	0.683905	RO	NS			OTU_1497	0.0153285	0.04824	1.17636	0.0410078	0.96729	RS	NS
OTU_2716	0.0606766	-0.194579	1.17386	-0.16576	0.868346	RO	NS			OTU_1498	0.0322515	-0.361093	1.17551	-0.307179	0.758707	RS	NS
OTU_2719	0.223227	-0.320461	0.962926	-0.332799	0.739286	RO	NS			OTU_1499	1.45797	-0.234981	0.251922	-0.932752	0.350948	RS	NS
OTU_2720	0.0439761	-0.108429	1.17408	-0.0923524	0.926418	RO	NS			OTU_1500	0.016526	-0.0974313	1.17642	-0.0828202	0.933994	RS	NS
OTU_2723	0.0126371	-0.155972	1.17441	-0.132809	0.894345	RO	NS			OTU_1501	0.0150378	-0.00710444	1.17641	-0.00603908	0.995182	RS	NS
OTU_2726	0.0131713	-0.195162	1.17423	-0.166204	0.867997	RO	NS			OTU_1502	0.0343653	-0.0187564	1.1764	-0.0159439	0.987279	RS	NS
OTU_2729	0.0592861	-0.283529	1.1739	-0.241529	0.809145	RO	NS			OTU_1503	0.0445162	-0.137084	1.17624	-0.116544	0.907222	RS	NS
OTU_2730	0.0240787	-0.00248919	1.17458	-0.00211921	0.998309	RO	NS			OTU_1505	0.0205193	-0.0337081	1.17642	-0.0286532	0.977141	RS	NS
OTU_2733	0.0190987	-0.195162	1.17423	-0.166204	0.867997	RO	NS			OTU_1506	0.0167992	-0.168816	1.17624	-0.143522	0.885878	RS	NS
OTU_2738	0.011785	-0.266877	1.17411	-0.227301	0.82019	RO	NS			OTU_1507	31.7161	-0.18257	0.0998148	-1.82909	0.0673857	RS	NS
OTU_2739	0.0103565	-0.155972	1.17441	-0.132809	0.894345	RO	NS			OTU_1508	7.25935	0.0142217	0.130423	0.109043	0.913169	RS	NS
OTU_2740	0.200338	0.145734	0.727798	0.20024	0.841293	RO	NS			OTU_1509	5.49299	-0.252825	0.1678	-1.50671	0.131885	RS	NS
OTU_2741	3.54199	0.151769	0.42776	0.354799	0.72274	RO	NS			OTU_1510	5.83685	-0.0612446	0.131587	-0.46543	0.641624	RS	NS
OTU_2742	2.89132	0.592369	0.515913	1.14819	0.250888	RO	NS			OTU_1511	1.73379	-1.08905	0.487755	-2.23278	0.0255633	RS	NS
OTU_2743	4.52141	-1.16914	0.394028	-2.96715	0.00300575	RO	NS			OTU_1512	2.31539	-0.031095	0.263705	-0.117916	0.906134	RS	NS
OTU_2744	67.2464	-0.196634	0.207056	-0.949664	0.342283	RO	NS			OTU_1513	89.2656	-0.0119864	0.0924172	-0.129698	0.896805	RS	NS
OTU_2745	99.7608	-0.385054	0.257364	-1.49614	0.134616	RO	NS			OTU_1514	1.29159	0.410236	0.257901	1.59067	0.111683	RS	NS
OTU_2747	9.19485	1.22207	0.629315	1.94191	0.0521481	RO	NS			OTU_1515	6.49083	-0.024309	0.113918	-0.21339	0.831023	RS	NS
OTU_2748	0.0490858	-0.323761	1.17397	-0.275784	0.782714	RO	NS			OTU_1516	8.35165	-0.0893819	0.232234	-0.384878	0.700327	RS	NS
OTU_2749	12.4524	-0.121734	0.314751	-0.386764	0.698931	RO	NS			OTU_1517	1.3969	-0.159149	0.24064	-0.661355	0.508385	RS	NS
OTU_2750	0.0324994	-0.382036	1.17364	-0.325514	0.744792	RO	NS			OTU_1518	1.14731	0.105903	0.233852	0.452861	0.650649	RS	NS
OTU_2751	0.897152	-1.37072	0.665744	-2.05893	0.0395005	RO	NS			OTU_1519	0.887541	0.0775312	0.51456	0.150675	0.880232	RS	NS
OTU_2752	0.212201	-0.291433	0.733524	-0.397306	0.691142	RO	NS			OTU_1520	0.94716	-0.0361919	0.33776	-0.107153	0.914668	RS	NS
OTU_2753	2.45508	-0.666903	0.472662	-1.41095	0.158259	RO	NS			OTU_1521	0.210737	0.0300744	0.713128	0.0421725	0.966361	RS	NS
OTU_2756	1.78324	-0.130859	0.403914	-0.323979	0.745954	RO	NS			OTU_1522	26.1881	-0.0011794	0.148909	-0.00792026	0.993681	RS	NS
OTU_2757	0.552537	-0.285073	0.638976	-0.44614	0.655496	RO	NS			OTU_1523	0.333047	-0.536524	0.600753	-0.893087	0.371811	RS	NS
OTU_2758	0.226902	-0.500063	1.1721	-0.426639	0.669642	RO	NS			OTU_1524	0.277371	0.111776	0.548902	0.203635	0.838638	RS	NS
OTU_2759	1.05575	0.0380274	0.492743	0.077175	0.938484	RO	NS			OTU_1525	0.355974	-0.0641966	0.531023	-0.120892	0.903776	RS	NS
OTU_2760	0.102347	-0.677832	1.17291	-0.577907	0.563327	RO	NS			OTU_1526	0.316648	0.451175	0.441244	1.02251	0.306541	RS	NS
OTU_2761	0.942421	-0.253565	0.523794	-0.484092	0.62832	RO	NS			OTU_1527	0.532309	-0.632498	0.623983	-1.01365	0.310751	RS	NS
OTU_2763	0.108815	-0.432893	0.907129	-0.477212	0.633211	RO	NS			OTU_1528	0.314995	-0.140607	0.459816	-0.30579	0.759765	RS	NS
OTU_2765	0.225156	0.210578	0.873659	0.24103	0.809532	RO	NS			OTU_1529	0.0460022	-0.27495	1.17575	-0.23385	0.815101	RS	NS
OTU_2772	0.265886	-0.181269	1.17367	-0.154446	0.877258	RO	NS			OTU_1530	0.160768	-0.35874	0.847998	-0.423044	0.672263	RS	NS
OTU_2774	0.0648721	-0.42295	1.17361	-0.360383	0.718561	RO	NS			OTU_1531	0.0362277	-0.069435	1.17645	-0.0590208	0.952936	RS	NS
OTU_2780	0.0202986	-0.0786461	1.17444	-0.066965	0.94661	RO	NS			OTU_1532	0.0807189	0.284971	1.17602	0.242318	0.808534	RS	NS
OTU_2782	0.0226265	-0.0668722	1.17455	-0.0569343	0.954597	RO	NS			OTU_1533	0.0403485	-0.137084	1.17624	-0.116544	0.907222	RS	NS
OTU_2783	0.0104204	-0.271624	1.17407	-0.231352	0.817041	RO	NS			OTU_1534	0.0663312	0.124909	1.17628	0.10619	0.915431	RS	NS
OTU_2784	0.00531275	-0.173263	1.17439	-0.147534	0.88271	RO	NS			OTU_1535	0.0548028	-0.0737141	1.17636	-0.0626628	0.950035	RS	NS
OTU_2785	0.0173237	-0.280095	1.17401	-0.23858	0.811431	RO	NS			OTU_1536	0.0360691	0.0632416	1.17633	0.0537618	0.957125	RS	NS
OTU_2786	0.0193668	-0.280095	1.17401	-0.23858	0.811431	RO	NS			OTU_1537	0.0228597	-0.0903339	1.17646	-0.0767845	0.938795	RS	NS
OTU_2790	2709.23	1.49669	0.358709	4.17243	3.01362e-05	RO	NS			OTU_1539	0.0632828	-0.213042	1.17601	-0.181157	0.856244	RS	NS
OTU_2792	17.4059	-0.120135	0.782812	-0.153466	0.878031	RO	NS			OTU_1540	0.0632561	-0.00380345	1.17638	-0.00323319	0.99742	RS	NS
OTU_2794	6.03126	-0.705443	0.286028	-2.46634	0.0136501	RO	NS			OTU_1541	0.0324512	-0.0187564	1.1764	-0.0159439	0.987279	RS	NS
OTU_2796	0.561708	-0.517853	0.97674	-0.530186	0.595983	RO	NS			OTU_1542	0.0409678	-0.0245821	1.17639	-0.0208962	0.983328	RS	NS
OTU_2797	0.194861	-0.436634	0.78655	-0.555126	0.578809	RO	NS			OTU_1543	0.0185879	-0.0337081	1.17642	-0.0286532	0.977141	RS	NS
OTU_2798	0.313849	-0.030292	0.716052	-0.0423042	0.966256	RO	NS			OTU_1544	0.043032	-0.0603118	1.17642	-0.0512671	0.959113	RS	NS
OTU_2799	0.0160626	-0.211622	1.17426	-0.180218	0.856981	RO	NS			OTU_1545	13.9434	0.0724945	0.120895	0.59965	0.548739	RS	NS
OTU_2800	0.20118	-0.341946	1.09967	-0.310953	0.755836	RO	NS			OTU_1547	0.0143192	-0.168816	1.17624	-0.143522	0.885878	RS	NS
OTU_2801	0.120683	-0.135101	1.17356	-0.115121	0.908349	RO	NS			OTU_1548	21.3091	0.271474	0.259385	1.04661	0.295281	RS	NS
OTU_2802	0.202598	-0.365122	1.17381	-0.311057	0.755757	RO	NS			OTU_1549	27.5624	0.365449	0.223675	1.63384	0.102293	RS	NS
OTU_2804	0.0184841	-0.131208	1.17431	-0.111732	0.911036	RO	NS			OTU_1550	7.36772	-0.140007	0.379981	-0.368458	0.712532	RS	NS
OTU_2806	0.0157864	-0.352563	1.17386	-0.300346	0.763913	RO	NS			OTU_1551	7.71749	-0.0747708	0.204849	-0.365004	0.715108	RS	NS
OTU_2807	0.0976965	-0.292463	1.02207	-0.286147	0.774766	RO	NS			OTU_1552	3.55858	-0.423921	0.322194	-1.31573	0.188264	RS	NS
OTU_2809	0.677348	-0.157225	0.633448	-0.248205	0.803976	RO	NS			OTU_1553	2.00782	0.258939	0.2172	1.19217	0.233195	RS	NS
OTU_2810	0.0825154	-0.432182	1.17328	-0.368355	0.712609	RO	NS			OTU_1554	1.85386	-0.111226	0.312916	-0.35545	0.722253	RS	NS
OTU_2811	0.190624	-0.0872123	0.96367	-0.0905001	0.92789	RO	NS			OTU_1555	1.2966	-0.157167	0.387561	-0.405528	0.68509	RS	NS
OTU_2814	0.0378478	0.0106834	1.17448	0.00909629	0.992742	RO	NS			OTU_1556	1.31861	0.715191	0.304613	2.34786	0.0188814	RS	NS
OTU_2816	0.0245246	-0.200194	1.17435	-0.170472	0.864639	RO	NS			OTU_1557	0.931537	0.801975	0.586881	1.3665	0.171781	RS	NS
OTU_2819	0.239387	-0.434431	0.792126	-0.548437	0.583392	RO	NS			OTU_1558	2.73008	0.280918	0.546477	0.514054	0.607214	RS	NS
OTU_2820	0.0663344	-0.387374	1.17354	-0.330089	0.741333	RO	NS			OTU_1559	1.09927	-0.186615	0.304583	-0.612689	0.540082	RS	NS
OTU_2825	0.0553203	-0.0535248	1.17397	-0.0455931	0.963635	RO	NS			OTU_1560	0.851429	0.320431	0.335974	0.953738	0.340216	RS	NS
OTU_2826	0.0574243	-0.544264	1.17324	-0.463898	0.642721	RO	NS			OTU_1561	0.467388	-0.0943909	0.467254	-0.202012	0.839908	RS	NS
OTU_2830	0.0619141	-0.0668722	1.17455	-0.0569343	0.954597	RO	NS			OTU_1562	0.429975	0.356384	0.536215	0.664629	0.506288	RS	NS
OTU_2831	0.0118957	-0.328811	1.17395	-0.28009	0.779408	RO	NS			OTU_1563	0.967762	-0.292324	0.41919	-0.697353	0.485582	RS	NS
OTU_2833	0.100261	-0.456458	1.17345	-0.38899	0.697284	RO	NS			OTU_1564	0.467276	-0.659507	0.569268	-1.15852	0.246653	RS	NS
OTU_2834	0.0250291	-0.430511	1.17366	-0.366811	0.71376	RO	NS			OTU_1565	0.166867	0.24649	1.17571	0.209652	0.83394	RS	NS
OTU_2836	0.00976529	-0.124227	1.17446	-0.105774	0.915762	RO	NS			OTU_1567	0.110018	0.0389453	1.13994	0.0341644	0.972746	RS	NS
OTU_2839	469.597	0.179534	0.269544	0.666066	0.505369	RO	NS			OTU_1568	0.0973525	0.143456	1.00987	0.142053	0.887038	RS	NS
OTU_2840	1.62132	0.282365	0.289383	0.975749	0.329189	RO	NS			OTU_1569	0.119877	-0.268458	1.17497	-0.22848	0.819273	RS	NS
OTU_2841	78.9385	-0.750223	0.57822	-1.29747	0.19447	RO	NS			OTU_1570	0.0929631	0.154623	1.16891	0.13228	0.894763	RS	NS
OTU_2842	0.156241	-0.334591	0.884674	-0.378208	0.705276	RO	NS			OTU_1571	0.0475532	-0.12096	1.17624	-0.102836	0.918093	RS	NS
OTU_2844	3.85805	-0.25474	0.572058	-0.445304	0.6561	RO	NS			OTU_1573	0.0377205	0.0335675	1.17636	0.0285351	0.977235	RS	NS
OTU_2845	5.5872	0.100408	0.289995	0.34624	0.729162	RO	NS			OTU_1574	0.0175062	-0.0903339	1.17646	-0.0767845	0.938795	RS	NS
OTU_2846	0.130061	-0.196324	1.02383	-0.191755	0.847934	RO	NS			OTU_1576	0.0200695	0.0286262	1.17638	0.0243342	0.980586	RS	NS
OTU_2847	0.0181432	-0.266876	1.17411	-0.227301	0.82019	RO	NS			OTU_1577	0.0202065	-0.0486587	1.17644	-0.0413611	0.967008	RS	NS
OTU_2848	0.0309571	-0.155972	1.17441	-0.132809	0.894345	RO	NS			OTU_1578	27.9584	-0.312508	0.412689	-0.757249	0.448901	RS	NS
OTU_2849	0.936493	-1.42708	0.781278	-1.82659	0.0677612	RO	NS			OTU_1579	9.82687	-0.0183851	0.126847	-0.144939	0.884759	RS	NS
OTU_2850	0.0126371	-0.155972	1.17441	-0.132809	0.894345	RO	NS			OTU_1580	4.17266	0.415696	0.189384	2.19499	0.0281644	RS	NS
OTU_2851	0.0768078	-0.0222638	1.17435	-0.0189584	0.984874	RO	NS			OTU_1581	11.0996	-0.140099	0.170707	-0.8207	0.411817	RS	NS
OTU_2852	9.96943	-1.37312	0.48604	-2.82512	0.00472625	RO	NS			OTU_1582	0.196733	0.272361	0.767905	0.354681	0.722829	RS	NS
OTU_2854	0.288692	0.215201	0.844428	0.254849	0.79884	RO	NS			OTU_1583	0.336849	-0.271952	0.568218	-0.478605	0.63222	RS	NS
OTU_2855	5.6408	-1.75847	0.522253	-3.3671	0.000759643	RO	Depleted			OTU_1584	0.145002	0.00532575	1.17635	0.00452734	0.996388	RS	NS
OTU_2856	0.0157109	-0.178899	1.17421	-0.152357	0.878905	RO	NS			OTU_1585	0.400739	0.743461	0.641216	1.15946	0.246271	RS	NS
OTU_2857	0.0715552	-0.450289	1.17339	-0.38375	0.701164	RO	NS			OTU_1586	0.103863	0.0891732	1.17616	0.075817	0.939565	RS	NS
OTU_2859	1.2184	-1.27704	1.01972	-1.25234	0.210446	RO	NS			OTU_1587	0.0184208	-0.0974313	1.17642	-0.0828202	0.933994	RS	NS
OTU_2862	0.0825955	0.0795185	1.17402	0.0677316	0.945999	RO	NS			OTU_1588	0.0897907	-0.0859012	1.01534	-0.0846035	0.932577	RS	NS
OTU_2863	0.00957072	-0.313617	1.17401	-0.267134	0.789366	RO	NS			OTU_1589	0.133398	0.0818093	0.857585	0.095395	0.924001	RS	NS
OTU_2864	0.108995	-0.178546	1.17421	-0.152057	0.879142	RO	NS			OTU_1590	0.113579	0.139071	1.17613	0.118244	0.905874	RS	NS
OTU_2865	0.0918473	-0.0215034	1.17355	-0.0183234	0.985381	RO	NS			OTU_1591	0.0544776	0.0810974	1.17632	0.0689415	0.945036	RS	NS
OTU_2866	0.296603	0.4467	1.17355	0.38064	0.703471	RO	NS			OTU_1592	0.0167992	-0.168816	1.17624	-0.143522	0.885878	RS	NS
OTU_2867	0.614966	-1.14558	0.923464	-1.24053	0.21478	RO	NS			OTU_1593	0.0673189	-0.206011	1.17597	-0.175183	0.860936	RS	NS
OTU_2868	0.0722276	-0.288677	1.17366	-0.245963	0.805711	RO	NS			OTU_1594	0.0842077	0.131327	1.17622	0.111652	0.9111	RS	NS
OTU_2869	0.147257	-0.49147	1.1734	-0.418844	0.67533	RO	NS			OTU_1595	0.0511046	-0.288534	1.17558	-0.24544	0.806115	RS	NS
OTU_2870	0.111716	-0.362154	1.17359	-0.308587	0.757636	RO	NS			OTU_1596	0.016526	-0.0974313	1.17642	-0.0828202	0.933994	RS	NS
OTU_2871	0.0884605	0.113936	1.17427	0.0970267	0.922705	RO	NS			OTU_1597	0.038467	-0.0666175	1.1764	-0.0566282	0.954841	RS	NS
OTU_2872	0.041296	-0.0937116	1.17405	-0.0798191	0.936381	RO	NS			OTU_1599	0.0382825	0.0585353	1.17634	0.0497603	0.960313	RS	NS
OTU_2874	0.0328257	-0.167182	1.17431	-0.142367	0.88679	RO	NS			OTU_1601	0.017032	-0.0337081	1.17642	-0.0286532	0.977141	RS	NS
OTU_2879	0.343831	-0.30497	1.17363	-0.259852	0.794978	RO	NS			OTU_1602	7.6641	0.404357	0.229572	1.76135	0.0781785	RS	NS
OTU_2885	0.0166709	-0.266876	1.17411	-0.227301	0.82019	RO	NS			OTU_1603	5.5866	0.113217	0.250717	0.451573	0.651577	RS	NS
OTU_2888	0.0216828	-0.293329	1.17391	-0.249873	0.802686	RO	NS			OTU_1604	6.7078	-0.213158	0.261424	-0.815371	0.41486	RS	NS
OTU_2890	0.0127671	-0.277966	1.17402	-0.236764	0.81284	RO	NS			OTU_1605	1.66801	-0.0175538	0.199701	-0.0879006	0.929956	RS	NS
OTU_2891	0.00531275	-0.173263	1.17439	-0.147534	0.88271	RO	NS			OTU_1606	1.1608	-0.350386	0.234256	-1.49574	0.134721	RS	NS
OTU_2895	6.4942	-0.27419	0.257218	-1.06598	0.286431	RO	NS			OTU_1607	0.699009	-0.0193938	0.588628	-0.0329474	0.973717	RS	NS
OTU_2896	3.17251	0.0241065	0.67505	0.0357106	0.971513	RO	NS			OTU_1608	0.74221	0.349193	0.385785	0.905151	0.365386	RS	NS
OTU_2897	0.0535888	0.0388204	1.17437	0.0330564	0.97363	RO	NS			OTU_1609	0.518918	-0.129513	0.594331	-0.217914	0.827496	RS	NS
OTU_2898	1.37725	0.204836	0.530226	0.386317	0.699262	RO	NS			OTU_1610	0.0697562	-0.0737141	1.17636	-0.0626628	0.950035	RS	NS
OTU_2899	12.3371	-0.245507	0.290921	-0.843895	0.398728	RO	NS			OTU_1611	2.31381	0.380264	0.385585	0.986201	0.324035	RS	NS
OTU_2900	0.403723	-0.324288	1.17114	-0.276901	0.781856	RO	NS			OTU_1612	0.0403479	-0.0666175	1.1764	-0.0566282	0.954841	RS	NS
OTU_2901	0.180754	-0.00628687	0.977774	-0.00642978	0.99487	RO	NS			OTU_1613	0.462513	-0.247109	0.485081	-0.509419	0.610459	RS	NS
OTU_2903	0.116464	-0.293329	1.17391	-0.249873	0.802686	RO	NS			OTU_1615	0.594284	-0.0613833	0.393162	-0.156127	0.875933	RS	NS
OTU_2907	0.0203933	-0.029022	1.17459	-0.0247082	0.980288	RO	NS			OTU_1616	0.290178	-0.173207	0.572138	-0.302736	0.762091	RS	NS
OTU_2910	0.0083239	-0.211622	1.17426	-0.180218	0.856981	RO	NS			OTU_1617	0.182508	-0.0224108	0.697494	-0.0321305	0.974368	RS	NS
OTU_2911	0.00510015	-0.22104	1.17427	-0.188237	0.850691	RO	NS			OTU_1618	0.189309	0.203263	0.639646	0.317774	0.750657	RS	NS
OTU_2912	5.75657	-0.462816	0.345037	-1.34135	0.179806	RO	NS			OTU_1619	0.131085	0.183645	0.768415	0.238991	0.811112	RS	NS
OTU_2916	0.0159382	-0.0651135	1.17455	-0.0554369	0.95579	RO	NS			OTU_1620	0.123486	-0.236532	0.877819	-0.269454	0.78758	RS	NS
OTU_2917	1.12043	0.217945	0.456817	0.477095	0.633295	RO	NS			OTU_1621	0.144876	-0.190244	1.10646	-0.171939	0.863486	RS	NS
OTU_2919	0.270321	-0.445838	0.781776	-0.570288	0.568482	RO	NS			OTU_1622	0.144536	-0.0430176	1.17625	-0.0365719	0.970826	RS	NS
OTU_2922	0.0959619	-0.121374	1.17329	-0.103447	0.917608	RO	NS			OTU_1623	0.0309816	-0.121304	1.17624	-0.103128	0.917861	RS	NS
OTU_2924	0.12647	-0.321815	1.17385	-0.274155	0.783966	RO	NS			OTU_1624	0.10174	-0.105642	0.98928	-0.106786	0.914958	RS	NS
OTU_2926	0.0507307	-0.282408	1.17413	-0.240525	0.809924	RO	NS			OTU_1625	0.0371757	0.0111506	1.17636	0.00947894	0.992437	RS	NS
OTU_2927	0.10525	-0.133738	1.17389	-0.113927	0.909296	RO	NS			OTU_1626	0.0209811	-0.00710444	1.17641	-0.00603908	0.995182	RS	NS
OTU_2932	0.0140086	-0.341945	1.1739	-0.291291	0.770829	RO	NS			OTU_1627	607.499	0.0995287	0.299732	0.332059	0.739845	RS	NS
OTU_2933	0.00531275	-0.173263	1.17439	-0.147534	0.88271	RO	NS			OTU_1628	137.592	-0.0638988	0.151266	-0.422427	0.672713	RS	NS
OTU_2934	0.0120394	-0.111354	1.17448	-0.0948117	0.924464	RO	NS			OTU_1629	103.216	0.0561847	0.0550068	1.02141	0.307058	RS	NS
OTU_2936	0.0490858	-0.323761	1.17397	-0.275784	0.782714	RO	NS			OTU_1630	7.85744	0.103476	0.383338	0.269934	0.787211	RS	NS
OTU_2938	198.051	-0.301962	0.313715	-0.962535	0.335781	RO	NS			OTU_1631	19.5758	-0.00181133	0.0978285	-0.0185154	0.985228	RS	NS
OTU_2939	0.893409	-0.0289679	0.49896	-0.0580566	0.953704	RO	NS			OTU_1632	13.1011	-0.129204	0.137374	-0.940524	0.346949	RS	NS
OTU_2940	0.854575	0.238327	1.17006	0.203687	0.838598	RO	NS			OTU_1633	7.93207	-0.106266	0.14735	-0.721176	0.470801	RS	NS
OTU_2941	10.9373	-0.427047	0.436427	-0.978508	0.327823	RO	NS			OTU_1634	7.37427	-0.0124865	0.325977	-0.038305	0.969445	RS	NS
OTU_2942	0.040048	-0.365122	1.17381	-0.311057	0.755757	RO	NS			OTU_1635	5.52998	0.0834647	0.202569	0.412031	0.680317	RS	NS
OTU_2943	0.455527	-0.846754	0.968751	-0.874068	0.382081	RO	NS			OTU_1636	3.67144	-0.169078	0.143	-1.18237	0.23706	RS	NS
OTU_2944	0.0133493	-0.282408	1.17413	-0.240525	0.809924	RO	NS			OTU_1637	9.98305	-0.515565	0.247631	-2.08198	0.0373439	RS	NS
OTU_2946	0.00835392	-0.138892	1.17443	-0.118263	0.905859	RO	NS			OTU_1638	2.51017	0.0146463	0.175117	0.0836371	0.933345	RS	NS
OTU_2947	0.0203873	-0.200194	1.17435	-0.170472	0.864639	RO	NS			OTU_1639	5.06237	0.410482	0.355353	1.15514	0.248033	RS	NS
OTU_2948	0.0481575	0.135559	1.17445	0.115423	0.90811	RO	NS			OTU_1640	0.541071	-0.286901	0.680281	-0.421739	0.673216	RS	NS
OTU_2949	5.74912	0.13567	0.51633	0.262759	0.792737	RO	NS			OTU_1642	0.846957	0.00409377	0.371636	0.0110156	0.991211	RS	NS
OTU_2950	0.369863	-0.448777	0.689726	-0.65066	0.515266	RO	NS			OTU_1643	0.261783	-0.0439349	0.518232	-0.0847784	0.932438	RS	NS
OTU_2951	0.0587945	-0.497797	1.17332	-0.424264	0.671373	RO	NS			OTU_1644	0.357523	-0.309419	0.549182	-0.563418	0.57315	RS	NS
OTU_2952	0.980273	-0.516967	0.655356	-0.788835	0.430209	RO	NS			OTU_1645	2.35303	0.607387	0.615714	0.986477	0.323899	RS	NS
OTU_2953	0.167635	-0.274675	0.967161	-0.284001	0.776409	RO	NS			OTU_1646	0.216117	0.0564582	0.594526	0.0949633	0.924344	RS	NS
OTU_2954	1.18629	-0.18958	0.57735	-0.328362	0.742638	RO	NS			OTU_1647	0.170276	-0.203882	0.965944	-0.21107	0.832833	RS	NS
OTU_2957	0.0140086	-0.341945	1.1739	-0.291291	0.770829	RO	NS			OTU_1648	0.269253	-0.190104	0.689295	-0.275795	0.782706	RS	NS
OTU_2960	0.219355	0.161721	0.623102	0.259542	0.795217	RO	NS			OTU_1650	0.218905	-0.122204	0.767107	-0.159305	0.873428	RS	NS
OTU_2962	0.108162	-0.675563	1.17291	-0.57597	0.564635	RO	NS			OTU_1651	0.11113	-0.139961	1.14054	-0.122714	0.902333	RS	NS
OTU_2964	0.0190987	-0.195162	1.17423	-0.166204	0.867997	RO	NS			OTU_1652	0.105175	-0.192595	1.0013	-0.192345	0.847472	RS	NS
OTU_2966	0.0167078	-0.0590811	1.17456	-0.0503006	0.959883	RO	NS			OTU_1653	0.11375	0.0873321	1.17626	0.0742456	0.940815	RS	NS
OTU_2967	0.0303961	-0.335115	1.17376	-0.285506	0.775256	RO	NS			OTU_1654	0.0656445	-0.0465557	1.17617	-0.0395824	0.968426	RS	NS
OTU_2971	0.011785	-0.266877	1.17411	-0.227301	0.82019	RO	NS			OTU_1655	0.0918548	-0.00632357	1.17634	-0.00537563	0.995711	RS	NS
OTU_2974	0.164584	-0.322731	1.10314	-0.292557	0.769861	RO	NS			OTU_1656	0.0354697	-0.227676	1.17599	-0.193603	0.846486	RS	NS
OTU_2976	0.0792429	-0.378085	1.17341	-0.32221	0.747293	RO	NS			OTU_1657	0.0504113	-0.281429	1.17567	-0.239379	0.810812	RS	NS
OTU_2977	0.0127671	-0.277966	1.17402	-0.236764	0.81284	RO	NS			OTU_1658	0.0816357	-0.207183	1.17593	-0.176187	0.860147	RS	NS
OTU_2978	0.240104	-0.00931757	1.17447	-0.00793343	0.99367	RO	NS			OTU_1659	0.0230011	-0.168816	1.17624	-0.143522	0.885878	RS	NS
OTU_2979	0.0517063	-0.203587	1.17399	-0.173414	0.862326	RO	NS			OTU_1660	0.0200841	0.0783834	1.17634	0.0666334	0.946874	RS	NS
OTU_2984	0.0134421	-0.195162	1.17423	-0.166204	0.867997	RO	NS			OTU_1661	0.0340639	0.0111506	1.17636	0.00947894	0.992437	RS	NS
OTU_2985	0.00567205	-0.218584	1.17426	-0.186146	0.85233	RO	NS			OTU_1662	0.0231476	-0.0974313	1.17642	-0.0828202	0.933994	RS	NS
OTU_2988	0.556565	-0.014592	0.501856	-0.029076	0.976804	RO	NS			OTU_1663	0.0210222	-0.0974313	1.17642	-0.0828202	0.933994	RS	NS
OTU_2989	0.0464144	-0.0927126	1.17405	-0.0789684	0.937058	RO	NS			OTU_1664	0.0200695	0.0286262	1.17638	0.0243342	0.980586	RS	NS
OTU_2990	0.603642	-0.287163	0.809231	-0.354859	0.722695	RO	NS			OTU_1665	391.813	0.101505	0.268845	0.37756	0.705757	RS	NS
OTU_2991	0.103386	-0.538316	1.173	-0.458923	0.646289	RO	NS			OTU_1666	69.8978	0.0399007	0.0548593	0.727328	0.467025	RS	NS
OTU_2992	0.164386	0.087263	1.01755	0.0857577	0.931659	RO	NS			OTU_1667	0.193399	0.0158219	1.09651	0.0144293	0.988487	RS	NS
OTU_2993	0.491955	0.133505	0.713905	0.187007	0.851655	RO	NS			OTU_1668	1.85451	0.756055	0.452047	1.67252	0.0944227	RS	NS
OTU_2995	2.68022	-0.274439	0.291481	-0.941531	0.346433	RO	NS			OTU_1669	6.61189	-0.0286506	0.143423	-0.199762	0.841666	RS	NS
OTU_2997	72.7971	-0.233188	0.193327	-1.20618	0.227746	RO	NS			OTU_1670	3.70329	0.000283785	0.251251	0.00112949	0.999099	RS	NS
OTU_2998	4.91485	-0.241841	0.349653	-0.69166	0.489151	RO	NS			OTU_1671	2.54154	-0.0160602	0.544187	-0.0295123	0.976456	RS	NS
OTU_2999	11.2904	-0.216449	0.2607	-0.830258	0.406393	RO	NS			OTU_1672	3.52439	-0.0384714	0.235785	-0.163163	0.87039	RS	NS
OTU_3001	42.7008	0.0615311	0.224616	0.27394	0.784131	RO	NS			OTU_1673	1.77431	0.127916	0.278369	0.459518	0.645862	RS	NS
OTU_3002	0.170692	0.261346	1.15687	0.225909	0.821272	RO	NS			OTU_1674	1.9983	-0.0286293	0.183933	-0.155651	0.876308	RS	NS
OTU_3004	3.43242	-0.0591505	0.310188	-0.190693	0.848766	RO	NS			OTU_1675	0.0620151	-0.146696	1.17616	-0.124725	0.900741	RS	NS
OTU_3006	7.86103	0.109617	0.27981	0.391755	0.695239	RO	NS			OTU_1676	0.292451	0.605907	1.17456	0.51586	0.605952	RS	NS
OTU_3007	0.126076	-0.0785275	1.17377	-0.0669022	0.94666	RO	NS			OTU_1677	0.97861	-0.0888707	0.255063	-0.348427	0.72752	RS	NS
OTU_3008	0.0250618	0.00533933	1.17458	0.00454573	0.996373	RO	NS			OTU_1678	0.181733	-0.174315	1.07964	-0.161456	0.871734	RS	NS
OTU_3010	0.334124	-0.132907	0.901858	-0.14737	0.88284	RO	NS			OTU_1679	0.528877	-0.138039	0.598042	-0.230818	0.817456	RS	NS
OTU_3011	0.0630634	-0.0668722	1.17455	-0.0569343	0.954597	RO	NS			OTU_1680	0.236343	0.0913573	0.540282	0.169092	0.865724	RS	NS
OTU_3013	0.0672105	-0.021977	1.1739	-0.0187214	0.985063	RO	NS			OTU_1681	0.199602	0.133131	0.749467	0.177634	0.85901	RS	NS
OTU_3014	0.024025	-0.167182	1.17431	-0.142367	0.88679	RO	NS			OTU_1682	0.213375	0.344842	0.63523	0.542862	0.587225	RS	NS
OTU_3016	0.00531275	-0.173263	1.17439	-0.147534	0.88271	RO	NS			OTU_1683	0.210845	-0.0743972	0.549567	-0.135374	0.892316	RS	NS
OTU_3017	0.00572071	-0.168806	1.17439	-0.143739	0.885707	RO	NS			OTU_1685	0.147306	0.120795	0.763368	0.15824	0.874268	RS	NS
OTU_3018	0.0126131	-0.211622	1.17426	-0.180218	0.856981	RO	NS			OTU_1686	0.124881	-0.174446	1.17553	-0.148397	0.882029	RS	NS
OTU_3019	0.0198261	-0.365122	1.17381	-0.311057	0.755757	RO	NS			OTU_1687	0.150817	0.192406	1.17598	0.163614	0.870035	RS	NS
OTU_3021	0.0198261	-0.365122	1.17381	-0.311057	0.755757	RO	NS			OTU_1688	0.0892275	-0.327476	1.17529	-0.278634	0.780525	RS	NS
OTU_3025	42.295	0.00385971	0.264766	0.0145778	0.988369	RO	NS			OTU_1689	0.0653497	-0.176558	1.17584	-0.150155	0.880642	RS	NS
OTU_3026	4.8217	-0.500511	0.706132	-0.708807	0.478445	RO	NS			OTU_1690	0.0400963	-0.0603118	1.17642	-0.0512671	0.959113	RS	NS
OTU_3027	3.29425	0.287165	0.243779	1.17797	0.238807	RO	NS			OTU_1691	0.0170618	-0.0974313	1.17642	-0.0828202	0.933994	RS	NS
OTU_3028	0.0519446	-0.079472	1.17399	-0.0676938	0.946029	RO	NS			OTU_1693	0.0204406	-0.0974313	1.17642	-0.0828202	0.933994	RS	NS
OTU_3030	4.55664	-0.0998026	0.342468	-0.291422	0.770729	RO	NS			OTU_1694	0.0215152	-0.0486587	1.17644	-0.0413611	0.967008	RS	NS
OTU_3031	9.51505	0.0277467	0.300342	0.092384	0.926393	RO	NS			OTU_1695	65.9887	-0.0387776	0.159837	-0.242607	0.80831	RS	NS
OTU_3033	0.201102	-0.809581	1.17231	-0.690588	0.489824	RO	NS			OTU_1696	87.0466	-0.0465974	0.273448	-0.170407	0.86469	RS	NS
OTU_3034	0.0160626	-0.211622	1.17426	-0.180218	0.856981	RO	NS			OTU_1697	30.3667	0.0136803	0.134441	0.101757	0.91895	RS	NS
OTU_3036	0.2222	0.14906	1.08563	0.137303	0.890792	RO	NS			OTU_1698	0.0547149	0.124909	1.17628	0.10619	0.915431	RS	NS
OTU_3037	0.429337	0.400816	0.94953	0.422121	0.672937	RO	NS			OTU_1699	13.4612	-0.0895341	0.151378	-0.591462	0.554211	RS	NS
OTU_3039	0.0245246	-0.200194	1.17435	-0.170472	0.864639	RO	NS			OTU_1700	11.9697	-0.0388881	0.0783996	-0.496024	0.619877	RS	NS
OTU_3040	0.242985	0.600007	1.17344	0.511325	0.609124	RO	NS			OTU_1701	2.26429	-0.11567	0.292278	-0.395753	0.692287	RS	NS
OTU_3041	0.0193668	-0.280095	1.17401	-0.23858	0.811431	RO	NS			OTU_1703	2.93211	-0.0425555	0.199404	-0.213414	0.831004	RS	NS
OTU_3042	0.0859325	0.0291389	1.17411	0.0248178	0.9802	RO	NS			OTU_1704	2.41057	0.0755304	0.235548	0.320658	0.74847	RS	NS
OTU_3044	0.00859071	-0.211622	1.17426	-0.180218	0.856981	RO	NS			OTU_1705	1.65418	-0.0733208	0.459452	-0.159583	0.873209	RS	NS
OTU_3046	0.0805775	-0.418624	1.17307	-0.356861	0.721196	RO	NS			OTU_1706	0.0205193	-0.0337081	1.17642	-0.0286532	0.977141	RS	NS
OTU_3049	0.0410564	-0.21615	1.17389	-0.184132	0.85391	RO	NS			OTU_1707	0.783555	-0.680829	0.328973	-2.06956	0.0384938	RS	NS
OTU_3051	0.399085	-0.262038	1.17385	-0.223229	0.823357	RO	NS			OTU_1709	1.09098	-0.453244	0.578382	-0.783642	0.43325	RS	NS
OTU_3054	0.0935704	-0.266876	1.17411	-0.227301	0.82019	RO	NS			OTU_1710	0.406456	-0.204514	0.829896	-0.246433	0.805347	RS	NS
OTU_3062	0.0220722	-0.365122	1.17381	-0.311057	0.755757	RO	NS			OTU_1711	4.17203	0.656979	0.330962	1.98506	0.0471378	RS	NS
OTU_3064	0.00691504	-0.213735	1.17426	-0.182017	0.85557	RO	NS			OTU_1712	8.28517	0.0465864	0.120896	0.385342	0.699984	RS	NS
OTU_3065	0.344452	-0.248532	1.05203	-0.236241	0.813246	RO	NS			OTU_1713	0.224778	-0.156664	0.543732	-0.288128	0.773249	RS	NS
OTU_3066	5.47526	0.522481	0.3005	1.7387	0.0820871	RO	NS			OTU_1714	0.350593	0.0738092	0.431055	0.171229	0.864043	RS	NS
OTU_3068	3.15754	-0.724655	0.464026	-1.56167	0.118366	RO	NS			OTU_1715	0.0499867	-0.0974313	1.17642	-0.0828202	0.933994	RS	NS
OTU_3069	0.040048	-0.365122	1.17381	-0.311057	0.755757	RO	NS			OTU_1716	0.220644	0.237751	1.17557	0.202243	0.839727	RS	NS
OTU_3070	0.227035	-0.0635093	1.17367	-0.0541116	0.956846	RO	NS			OTU_1717	0.121112	-0.280976	0.988492	-0.284247	0.776221	RS	NS
OTU_3071	2.69018	-1.18672	0.866699	-1.36924	0.170923	RO	NS			OTU_1718	0.215226	-0.00105667	0.710144	-0.00148796	0.998813	RS	NS
OTU_3073	0.0245246	-0.200194	1.17435	-0.170472	0.864639	RO	NS			OTU_1719	0.205429	-0.246531	0.702665	-0.350851	0.7257	RS	NS
OTU_3074	0.0526145	-0.412226	1.17339	-0.351311	0.725355	RO	NS			OTU_1720	0.124134	-0.472639	0.782355	-0.604123	0.545762	RS	NS
OTU_3077	0.599576	-0.354974	0.652562	-0.54397	0.586462	RO	NS			OTU_1721	0.21569	0.461721	0.761214	0.606558	0.544144	RS	NS
OTU_3079	1.14608	0.145449	0.378219	0.384562	0.700562	RO	NS			OTU_1722	0.14452	-0.593871	1.10858	-0.535707	0.592161	RS	NS
OTU_3080	0.0198261	-0.365122	1.17381	-0.311057	0.755757	RO	NS			OTU_1723	0.101322	-0.188732	1.1634	-0.162225	0.871129	RS	NS
OTU_3081	0.0232506	-0.211622	1.17426	-0.180218	0.856981	RO	NS			OTU_1724	0.0365214	-0.0187564	1.1764	-0.0159439	0.987279	RS	NS
OTU_3083	0.0517823	0.151223	1.17442	0.128764	0.897544	RO	NS			OTU_1725	0.116892	-0.303788	0.985348	-0.308305	0.75785	RS	NS
OTU_3084	0.0467068	-0.321422	1.17372	-0.273849	0.784201	RO	NS			OTU_1726	0.0639196	-0.179148	1.17594	-0.152344	0.878915	RS	NS
OTU_3085	0.52116	0.110735	0.675399	0.163955	0.869766	RO	NS			OTU_1727	0.0167992	-0.168816	1.17624	-0.143522	0.885878	RS	NS
OTU_3088	0.0666835	-0.347147	1.17356	-0.295808	0.767377	RO	NS			OTU_1728	0.0428397	-0.0603118	1.17642	-0.0512671	0.959113	RS	NS
OTU_3090	0.0117601	-0.362653	1.1739	-0.30893	0.757375	RO	NS			OTU_1729	0.049282	-0.0603118	1.17642	-0.0512671	0.959113	RS	NS
OTU_3091	0.143413	-0.264847	1.17398	-0.225597	0.821515	RO	NS			OTU_1731	0.0143192	-0.168816	1.17624	-0.143522	0.885878	RS	NS
OTU_3092	0.304089	0.329054	1.14138	0.288295	0.773121	RO	NS			OTU_1733	282.909	0.0294099	0.0563922	0.521524	0.602002	RS	NS
OTU_3095	0.0481878	-0.144975	1.17416	-0.123472	0.901734	RO	NS			OTU_1734	77.5197	-0.0187066	0.102067	-0.183278	0.85458	RS	NS
OTU_3098	0.0405743	-0.249008	1.17395	-0.212111	0.83202	RO	NS			OTU_1735	9.7305	-0.528312	0.28551	-1.85042	0.0642535	RS	NS
OTU_3100	0.00531275	-0.173263	1.17439	-0.147534	0.88271	RO	NS			OTU_1736	8.32755	-0.217391	0.201518	-1.07877	0.280691	RS	NS
OTU_3102	0.116619	-0.365122	1.17381	-0.311057	0.755757	RO	NS			OTU_1737	29.0926	-0.196878	0.107968	-1.82348	0.0682309	RS	NS
OTU_3104	0.0193668	-0.280095	1.17401	-0.23858	0.811431	RO	NS			OTU_1738	3.39123	-0.442509	0.26592	-1.66407	0.0960987	RS	NS
OTU_3105	0.0251389	-0.291595	1.17387	-0.248404	0.803822	RO	NS			OTU_1739	1.99136	-0.0520965	0.180545	-0.288551	0.772925	RS	NS
OTU_3106	39.7489	0.102839	0.199867	0.514537	0.606877	RO	NS			OTU_1740	1.66654	0.0544682	0.260356	0.209206	0.834287	RS	NS
OTU_3107	0.0126371	-0.155972	1.17441	-0.132809	0.894345	RO	NS			OTU_1741	1.20339	-0.121035	0.384317	-0.314935	0.752811	RS	NS
OTU_3108	24.0264	0.465345	0.252912	1.83995	0.0657753	RO	NS			OTU_1742	0.700026	-0.105718	0.354444	-0.298265	0.765501	RS	NS
OTU_3109	0.973933	-0.179317	0.770061	-0.232861	0.815869	RO	NS			OTU_1743	0.703566	0.0758051	0.521936	0.145238	0.884523	RS	NS
OTU_3110	7.96799	-0.406548	0.568121	-0.715602	0.474237	RO	NS			OTU_1744	0.317831	-0.470051	0.589087	-0.79793	0.424911	RS	NS
OTU_3111	21.6052	-0.21556	0.340654	-0.632782	0.526876	RO	NS			OTU_1745	0.221749	0.323187	0.59512	0.543062	0.587087	RS	NS
OTU_3112	0.238137	0.165574	1.08896	0.152048	0.879149	RO	NS			OTU_1746	0.484185	0.23592	0.459679	0.513226	0.607793	RS	NS
OTU_3113	6.02319	0.0382717	0.334142	0.114537	0.908812	RO	NS			OTU_1747	0.182087	0.247028	0.705108	0.35034	0.726083	RS	NS
OTU_3114	0.54693	-0.0284885	0.65221	-0.0436799	0.96516	RO	NS			OTU_1748	0.211214	-0.623115	1.05821	-0.588837	0.555971	RS	NS
OTU_3115	0.133084	-0.303875	1.01969	-0.298008	0.765697	RO	NS			OTU_1749	0.0472882	0.164235	1.17622	0.13963	0.888952	RS	NS
OTU_3116	8.87	-0.541418	0.337398	-1.60469	0.108563	RO	NS			OTU_1750	1.04866	-0.255117	0.345936	-0.73747	0.460837	RS	NS
OTU_3117	0.0464529	-0.059596	1.17413	-0.0507576	0.959519	RO	NS			OTU_1751	0.118067	-0.46762	1.13849	-0.410739	0.681264	RS	NS
OTU_3118	0.0603672	-0.348033	1.17339	-0.296605	0.766768	RO	NS			OTU_1752	0.210213	-0.194236	0.760294	-0.255475	0.798356	RS	NS
OTU_3120	0.61248	-0.731795	0.754373	-0.97007	0.332012	RO	NS			OTU_1753	0.165096	-0.392135	0.761585	-0.514893	0.606628	RS	NS
OTU_3121	0.852577	0.207051	0.799222	0.259066	0.795584	RO	NS			OTU_1754	0.0744373	-0.0583045	1.17635	-0.0495638	0.96047	RS	NS
OTU_3124	0.108832	-0.313831	1.13314	-0.276957	0.781813	RO	NS			OTU_1755	0.0488264	0.0856228	1.1763	0.0727898	0.941973	RS	NS
OTU_3125	0.149903	-0.238971	1.17418	-0.203521	0.838728	RO	NS			OTU_1756	0.0677425	-0.115254	1.17615	-0.0979922	0.921938	RS	NS
OTU_3126	0.0422999	-0.246529	1.17397	-0.209995	0.833671	RO	NS			OTU_1757	0.0476536	-0.274432	1.17564	-0.233432	0.815426	RS	NS
OTU_3127	0.0140086	-0.341945	1.1739	-0.291291	0.770829	RO	NS			OTU_1758	0.0436951	0.0377552	1.17635	0.0320951	0.974396	RS	NS
OTU_3130	18.8345	-0.350546	0.377675	-0.928168	0.35332	RO	NS			OTU_1759	0.0375227	0.0228009	1.17637	0.0193823	0.984536	RS	NS
OTU_3132	0.0315317	-0.155972	1.17441	-0.132809	0.894345	RO	NS			OTU_1761	0.0247386	-0.0903339	1.17646	-0.0767845	0.938795	RS	NS
OTU_3137	0.0280059	-0.266208	1.17393	-0.226766	0.820606	RO	NS			OTU_1762	0.0345902	0.0734914	1.17633	0.0624753	0.950184	RS	NS
OTU_3139	0.0101461	-0.270868	1.17408	-0.230707	0.817542	RO	NS			OTU_1763	0.0309816	-0.121304	1.17624	-0.103128	0.917861	RS	NS
OTU_3140	0.0142801	-0.381146	1.17384	-0.324699	0.745409	RO	NS			OTU_1764	0.0474865	-0.432853	1.17518	-0.368329	0.712628	RS	NS
OTU_3141	0.0173237	-0.280095	1.17401	-0.23858	0.811431	RO	NS			OTU_1765	0.043616	0.0111506	1.17636	0.00947894	0.992437	RS	NS
OTU_3144	0.0103565	-0.155972	1.17441	-0.132809	0.894345	RO	NS			OTU_1767	0.0230011	-0.168816	1.17624	-0.143522	0.885878	RS	NS
OTU_3146	1.41622	0.0209573	0.69012	0.0303676	0.975774	RO	NS			OTU_1768	0.0196536	0.0286262	1.17638	0.0243342	0.980586	RS	NS
OTU_3147	53.3265	0.0708242	0.448436	0.157936	0.874507	RO	NS			OTU_1770	1487.93	-0.0313218	0.0656649	-0.476994	0.633366	RS	NS
OTU_3148	243.506	-0.695422	0.446179	-1.55862	0.119087	RO	NS			OTU_1771	2.34492	-0.140881	0.233268	-0.603942	0.545882	RS	NS
OTU_3149	4.07822	0.461802	0.380402	1.21398	0.224754	RO	NS			OTU_1772	4.01469	-0.0861773	0.188739	-0.456596	0.647961	RS	NS
OTU_3150	5.66112	-0.287446	0.282891	-1.0161	0.309581	RO	NS			OTU_1773	2.06724	-0.0912059	0.215462	-0.423304	0.672073	RS	NS
OTU_3151	2.84651	0.658975	0.924672	0.712658	0.476058	RO	NS			OTU_1774	1.34241	-0.609962	0.334574	-1.8231	0.0682887	RS	NS
OTU_3152	0.141735	-0.015123	0.983823	-0.0153717	0.987736	RO	NS			OTU_1775	0.930982	-1.1039	0.538189	-2.05114	0.0402537	RS	NS
OTU_3154	1.32417	-0.37138	0.745837	-0.497937	0.618528	RO	NS			OTU_1776	0.695955	0.131321	0.38769	0.338727	0.734815	RS	NS
OTU_3156	3.32569	-0.664115	0.425951	-1.55914	0.118964	RO	NS			OTU_1777	0.867631	-0.258972	0.332217	-0.779527	0.435669	RS	NS
OTU_3157	0.367601	0.141303	1.17261	0.120503	0.904085	RO	NS			OTU_1778	5.69953	-0.0716486	0.14836	-0.482939	0.629139	RS	NS
OTU_3158	1.60931	0.133636	0.331103	0.403609	0.6865	RO	NS			OTU_1779	0.0947006	-0.208606	1.01207	-0.206118	0.836699	RS	NS
OTU_3159	0.976655	0.206021	0.426034	0.483579	0.628685	RO	NS			OTU_1780	0.319673	0.0370285	0.651346	0.0568492	0.954665	RS	NS
OTU_3160	0.0083239	-0.211622	1.17426	-0.180218	0.856981	RO	NS			OTU_1781	0.155305	0.0990202	0.696917	0.142083	0.887014	RS	NS
OTU_3161	0.0582319	-0.266876	1.17411	-0.227301	0.82019	RO	NS			OTU_1782	0.152267	-0.274715	0.769276	-0.357109	0.72101	RS	NS
OTU_3162	0.0884144	-0.157061	1.17404	-0.133778	0.893578	RO	NS			OTU_1783	0.17667	-0.288181	0.770629	-0.373955	0.708438	RS	NS
OTU_3163	0.952943	-0.437243	1.17312	-0.372719	0.709358	RO	NS			OTU_1784	0.122536	0.123625	0.879131	0.140622	0.888169	RS	NS
OTU_3164	0.245182	-0.967612	1.17184	-0.825722	0.408962	RO	NS			OTU_1785	0.0496145	-0.15033	1.17599	-0.127833	0.898281	RS	NS
OTU_3166	0.234349	-0.435677	0.680209	-0.640505	0.521845	RO	NS			OTU_1786	0.10095	0.0768886	1.1763	0.0653649	0.947883	RS	NS
OTU_3171	0.0214981	-0.38569	1.17374	-0.328599	0.742459	RO	NS			OTU_1787	0.0579287	-0.112378	1.17632	-0.0955331	0.923891	RS	NS
OTU_3173	0.221347	-0.254723	1.1742	-0.216932	0.828261	RO	NS			OTU_1788	0.017032	-0.0337081	1.17642	-0.0286532	0.977141	RS	NS
OTU_3174	0.0599102	-0.449718	1.17343	-0.38325	0.701535	RO	NS			OTU_1789	0.0582592	-0.0304077	1.17638	-0.0258485	0.979378	RS	NS
OTU_3175	0.0117601	-0.362653	1.1739	-0.30893	0.757375	RO	NS			OTU_1790	0.0200841	0.0783834	1.17634	0.0666334	0.946874	RS	NS
OTU_3179	0.0320065	-0.266208	1.17393	-0.226766	0.820606	RO	NS			OTU_1791	0.0154908	-0.0974313	1.17642	-0.0828202	0.933994	RS	NS
OTU_3181	0.0120394	-0.111354	1.17448	-0.0948117	0.924464	RO	NS			OTU_1792	0.0200695	0.0286262	1.17638	0.0243342	0.980586	RS	NS
OTU_3182	0.279671	0.231208	1.00324	0.230462	0.817733	RO	NS			OTU_1793	0.0154908	-0.0974313	1.17642	-0.0828202	0.933994	RS	NS
OTU_3188	0.139245	-0.403641	0.995784	-0.40535	0.68522	RO	NS			OTU_1794	0.0307111	-0.168816	1.17624	-0.143522	0.885878	RS	NS
OTU_3189	4.02213	0.339114	0.409287	0.828548	0.40736	RO	NS			OTU_1795	0.0167992	-0.168816	1.17624	-0.143522	0.885878	RS	NS
OTU_3190	3.67128	-1.28012	0.559217	-2.28912	0.0220722	RO	NS			OTU_1796	90.8329	-0.0252926	0.159316	-0.158757	0.87386	RS	NS
OTU_3191	21.0494	-0.666816	0.462852	-1.44067	0.149678	RO	NS			OTU_1797	22.9674	-0.77344	0.243443	-3.17709	0.0014876	RS	NS
OTU_3192	0.30715	-0.794214	1.17233	-0.677467	0.49811	RO	NS			OTU_1798	9.38328	-0.376722	0.377237	-0.998634	0.317972	RS	NS
OTU_3193	6.34007	0.306683	0.434237	0.706257	0.480028	RO	NS			OTU_1799	25.9587	0.0720454	0.0954201	0.755034	0.450229	RS	NS
OTU_3194	0.0357811	0.00876041	1.17448	0.00745896	0.994049	RO	NS			OTU_1800	4.53148	-0.140128	0.0998376	-1.40356	0.160451	RS	NS
OTU_3195	0.0504525	-0.108429	1.17408	-0.0923524	0.926418	RO	NS			OTU_1801	3.38699	-0.176151	0.185046	-0.951929	0.341133	RS	NS
OTU_3196	0.233019	-0.500312	0.807287	-0.619745	0.535426	RO	NS			OTU_1802	9.79887	-0.0242081	0.260997	-0.0927527	0.9261	RS	NS
OTU_3197	0.0793046	-0.615187	1.17305	-0.524433	0.599978	RO	NS			OTU_1803	1.76874	-0.170847	0.237587	-0.719092	0.472084	RS	NS
OTU_3198	0.789361	-0.676675	0.503584	-1.34372	0.17904	RO	NS			OTU_1804	0.531283	-0.112654	0.453501	-0.248409	0.803818	RS	NS
OTU_3199	1.03695	-0.171303	0.605717	-0.28281	0.777322	RO	NS			OTU_1805	1.15543	-0.260502	0.413743	-0.629624	0.528941	RS	NS
OTU_3200	93.0872	-0.856905	0.422178	-2.02972	0.0423846	RO	NS			OTU_1806	1.04807	-0.138997	0.279284	-0.497692	0.618701	RS	NS
OTU_3204	0.88459	-0.722874	0.894667	-0.80798	0.419102	RO	NS			OTU_1807	0.69215	0.0220221	0.341544	0.0644781	0.94859	RS	NS
OTU_3208	0.221326	-0.305285	0.51888	-0.588354	0.556295	RO	NS			OTU_1808	0.702458	-0.0255989	0.488206	-0.0524346	0.958182	RS	NS
OTU_3212	7.35523	-0.352339	0.259646	-1.357	0.174781	RO	NS			OTU_1809	0.581565	0.0906712	0.461501	0.19647	0.844242	RS	NS
OTU_3214	0.062833	-0.0282731	1.17459	-0.0240707	0.980796	RO	NS			OTU_1810	0.471814	-0.451136	0.474084	-0.951594	0.341303	RS	NS
OTU_3216	0.0266987	-0.323761	1.17397	-0.275784	0.782714	RO	NS			OTU_1811	0.0614222	-0.27495	1.17575	-0.23385	0.815101	RS	NS
OTU_3217	0.0191414	-0.372797	1.17378	-0.317603	0.750786	RO	NS			OTU_1812	0.193643	-0.466591	0.944335	-0.494095	0.621239	RS	NS
OTU_3218	27.3913	-0.0283198	0.216219	-0.130977	0.895793	RO	NS			OTU_1814	0.121953	-0.270464	0.872199	-0.310094	0.75649	RS	NS
OTU_3220	0.0157864	-0.352563	1.17386	-0.300346	0.763913	RO	NS			OTU_1815	0.141139	-0.237479	0.852272	-0.278642	0.780519	RS	NS
OTU_3222	0.0193668	-0.280095	1.17401	-0.23858	0.811431	RO	NS			OTU_1816	0.133969	0.188461	0.864751	0.217936	0.827479	RS	NS
OTU_3223	0.0131713	-0.195162	1.17423	-0.166204	0.867997	RO	NS			OTU_1817	0.117125	0.0873321	1.17626	0.0742456	0.940815	RS	NS
OTU_3224	0.0490858	-0.323761	1.17397	-0.275784	0.782714	RO	NS			OTU_1818	0.115938	-0.308589	1.17529	-0.262565	0.792886	RS	NS
OTU_3225	15.3479	-0.557423	0.251286	-2.21828	0.0265357	RO	NS			OTU_1819	0.0471827	0.123307	1.17628	0.104829	0.916512	RS	NS
OTU_3226	363.308	-0.219434	0.381509	-0.575173	0.565174	RO	NS			OTU_1822	0.0743192	0.00532575	1.17635	0.00452734	0.996388	RS	NS
OTU_3227	4.01929	-0.648953	0.435446	-1.49032	0.136141	RO	NS			OTU_1823	0.0715942	0.0884486	1.17631	0.0751915	0.940062	RS	NS
OTU_3228	0.621637	-0.0614217	0.687544	-0.089335	0.928816	RO	NS			OTU_1824	0.0161258	-0.254266	1.17601	-0.216212	0.828823	RS	NS
OTU_3229	0.0268027	-0.0910081	1.17432	-0.0774983	0.938227	RO	NS			OTU_1827	0.0144642	-0.168816	1.17624	-0.143522	0.885878	RS	NS
OTU_3230	0.142643	0.230294	1.17396	0.19617	0.844477	RO	NS			OTU_1828	30.1407	-0.0221415	0.464863	-0.0476302	0.962011	RS	NS
OTU_3231	39.5117	0.0125103	0.209507	0.0597131	0.952384	RO	NS			OTU_1829	0.0186289	-0.0486587	1.17644	-0.0413611	0.967008	RS	NS
OTU_3232	0.453246	-0.87414	1.17081	-0.746611	0.455298	RO	NS			OTU_1830	0.0205837	-0.0843834	1.17647	-0.0717258	0.94282	RS	NS
OTU_3234	1.77575	-1.04613	0.669544	-1.56246	0.11818	RO	NS			OTU_1831	101.323	0.0416879	0.343083	0.12151	0.903287	RS	NS
OTU_3236	0.0396523	-0.471784	1.17346	-0.402047	0.68765	RO	NS			OTU_1832	16.7476	-0.287692	0.213783	-1.34572	0.178392	RS	NS
OTU_3237	0.043229	-0.456866	1.17344	-0.389337	0.697027	RO	NS			OTU_1833	5.50669	0.052991	0.209602	0.252817	0.80041	RS	NS
OTU_3238	0.0160626	-0.211622	1.17426	-0.180218	0.856981	RO	NS			OTU_1834	6.30217	-0.233303	0.155757	-1.49786	0.134169	RS	NS
OTU_3241	19.3913	0.0734642	0.243446	0.301768	0.762829	RO	NS			OTU_1835	3.33702	0.0860541	0.283773	0.30325	0.7617	RS	NS
OTU_3244	0.0195306	-0.035448	1.17459	-0.030179	0.975924	RO	NS			OTU_1836	1.99685	0.542647	0.426829	1.27134	0.203606	RS	NS
OTU_3245	0.0299683	0.0241155	1.17458	0.0205313	0.98362	RO	NS			OTU_1837	0.499597	-0.235467	0.592024	-0.397733	0.690827	RS	NS
OTU_3246	0.0507936	-0.155972	1.17441	-0.132809	0.894345	RO	NS			OTU_1838	3.49587	-0.609255	0.274055	-2.22311	0.0262086	RS	NS
OTU_3248	0.0108414	-0.266877	1.17411	-0.227301	0.82019	RO	NS			OTU_1839	0.897155	0.271757	0.49359	0.550572	0.581927	RS	NS
OTU_3253	0.098878	-0.393605	1.17352	-0.335404	0.73732	RO	NS			OTU_1840	0.266698	-0.265333	1.17526	-0.225765	0.821384	RS	NS
OTU_3258	0.00691504	-0.213735	1.17426	-0.182017	0.85557	RO	NS			OTU_1841	0.213987	0.285102	0.702063	0.406092	0.684675	RS	NS
OTU_3259	0.0127293	-0.211622	1.17426	-0.180218	0.856981	RO	NS			OTU_1842	0.620473	-0.131035	0.433517	-0.302261	0.762453	RS	NS
OTU_3261	3.60936	-0.400065	0.336066	-1.19044	0.233875	RO	NS			OTU_1843	8.73409	0.0894701	0.260119	0.343958	0.730878	RS	NS
OTU_3262	16.7628	0.165178	0.440418	0.375048	0.707625	RO	NS			OTU_1844	0.518365	-0.0641358	0.463147	-0.138478	0.889863	RS	NS
OTU_3263	17.1265	-0.0965038	0.186446	-0.517598	0.604739	RO	NS			OTU_1845	0.340922	0.0417391	0.78938	0.0528758	0.957831	RS	NS
OTU_3264	24.8185	-0.842379	0.329793	-2.55426	0.0106412	RO	NS			OTU_1846	0.470811	-0.427312	0.452044	-0.945288	0.344512	RS	NS
OTU_3265	91.7485	-0.225275	0.19775	-1.13919	0.254623	RO	NS			OTU_1847	2.16506	0.70821	0.395507	1.79064	0.0733514	RS	NS
OTU_3266	22.053	0.0392063	0.22105	0.177364	0.859223	RO	NS			OTU_1848	0.132549	-0.00485861	0.877479	-0.00553701	0.995582	RS	NS
OTU_3267	0.286072	0.466034	1.14934	0.40548	0.685124	RO	NS			OTU_1849	0.132755	-0.265333	1.17526	-0.225765	0.821384	RS	NS
OTU_3269	48.0709	-0.609351	0.425741	-1.43127	0.152353	RO	NS			OTU_1850	0.120081	0.206875	1.17609	0.1759	0.860372	RS	NS
OTU_3270	10.7229	0.0196296	0.253386	0.0774691	0.93825	RO	NS			OTU_1852	0.105714	-0.144717	1.17591	-0.123069	0.902053	RS	NS
OTU_3271	9.70027	-1.0625	0.515489	-2.06115	0.0392887	RO	NS			OTU_1853	0.0631401	0.0560194	1.17631	0.047623	0.962017	RS	NS
OTU_3272	0.127736	-0.421635	1.1729	-0.359481	0.719235	RO	NS			OTU_1854	0.0764474	-0.232933	1.17586	-0.198097	0.84297	RS	NS
OTU_3274	1.44774	-0.393146	0.69908	-0.562377	0.573859	RO	NS			OTU_1855	0.017032	-0.0337081	1.17642	-0.0286532	0.977141	RS	NS
OTU_3275	0.362307	-0.806201	1.17195	-0.687914	0.491507	RO	NS			OTU_1856	0.0200695	0.0286262	1.17638	0.0243342	0.980586	RS	NS
OTU_3276	7.24858	-0.706968	0.409452	-1.72662	0.0842359	RO	NS			OTU_1858	0.0205193	-0.0337081	1.17642	-0.0286532	0.977141	RS	NS
OTU_3277	0.0536201	-0.50185	1.17342	-0.427681	0.668883	RO	NS			OTU_1859	0.0190128	-0.0337081	1.17642	-0.0286532	0.977141	RS	NS
OTU_3282	0.0120394	-0.111354	1.17448	-0.0948117	0.924464	RO	NS			OTU_1862	0.0215971	-0.0486587	1.17644	-0.0413611	0.967008	RS	NS
OTU_3284	104.501	-0.291753	0.262442	-1.11169	0.266274	RO	NS			OTU_1863	5.40834	-0.301515	0.403788	-0.746716	0.455235	RS	NS
OTU_3287	0.0110402	-0.227453	1.17427	-0.193697	0.846413	RO	NS			OTU_1864	39.241	-0.0861388	0.0850724	-1.01254	0.311282	RS	NS
OTU_3294	0.0120394	-0.111354	1.17448	-0.0948117	0.924464	RO	NS			OTU_1865	6.08153	0.354635	0.297354	1.19263	0.233013	RS	NS
OTU_3297	0.00691504	-0.213735	1.17426	-0.182017	0.85557	RO	NS			OTU_1866	1.68426	0.159628	0.536405	0.297589	0.766017	RS	NS
OTU_3298	0.0127293	-0.211622	1.17426	-0.180218	0.856981	RO	NS			OTU_1867	5.59387	0.279696	0.375235	0.745387	0.456038	RS	NS
OTU_3300	51.6491	0.778614	0.241539	3.22356	0.00126608	RO	NS			OTU_1868	31.9558	-0.00380457	0.0621203	-0.0612452	0.951164	RS	NS
OTU_3301	127.946	-0.25361	0.204265	-1.24157	0.214395	RO	NS			OTU_1869	0.0548726	0.0560194	1.17631	0.047623	0.962017	RS	NS
OTU_3302	5.67671	-0.470857	0.82484	-0.570847	0.568103	RO	NS			OTU_1870	0.263252	0.429702	0.639828	0.671589	0.501845	RS	NS
OTU_3303	29.7914	-0.892582	0.474101	-1.88268	0.0597432	RO	NS			OTU_1871	0.343457	-0.0956603	0.52887	-0.180877	0.856464	RS	NS
OTU_3304	0.479421	-0.447738	1.06102	-0.421988	0.673034	RO	NS			OTU_1872	0.94927	-0.00206802	0.267168	-0.00774054	0.993824	RS	NS
OTU_3305	29.4768	-1.49507	0.638118	-2.34294	0.0191325	RO	NS			OTU_1875	7.14359	-0.0270135	0.159068	-0.169824	0.865149	RS	NS
OTU_3306	147.202	-0.254601	0.266418	-0.955644	0.339252	RO	NS			OTU_1876	0.447361	-0.138135	0.49238	-0.280545	0.77906	RS	NS
OTU_3307	0.00957072	-0.313617	1.17401	-0.267134	0.789366	RO	NS			OTU_1877	0.234021	0.118937	0.708948	0.167765	0.866768	RS	NS
OTU_3308	2.85111	0.418184	0.417804	1.00091	0.316871	RO	NS			OTU_1878	0.358673	-0.220491	0.524411	-0.420454	0.674154	RS	NS
OTU_3309	46.6155	-0.48468	0.465923	-1.04026	0.29822	RO	NS			OTU_1879	0.102859	-0.0299261	1.17619	-0.0254433	0.979701	RS	NS
OTU_3310	2.31592	0.183696	0.925872	0.198403	0.84273	RO	NS			OTU_1880	0.151645	-0.0410239	0.768312	-0.0533949	0.957417	RS	NS
OTU_3311	0.0193668	-0.280095	1.17401	-0.23858	0.811431	RO	NS			OTU_1881	0.0550903	0.10916	1.1763	0.092799	0.926063	RS	NS
OTU_3312	1.22596	-1.34245	0.754022	-1.78039	0.0750129	RO	NS			OTU_1882	0.019344	-0.0486587	1.17644	-0.0413611	0.967008	RS	NS
OTU_3313	0.0309571	-0.155972	1.17441	-0.132809	0.894345	RO	NS			OTU_1883	0.0170618	-0.0974313	1.17642	-0.0828202	0.933994	RS	NS
OTU_3314	3.7742	-0.749636	0.315208	-2.37822	0.0173962	RO	NS			OTU_1884	0.0496104	-0.0898598	1.17624	-0.0763956	0.939104	RS	NS
OTU_3315	0.00691504	-0.213735	1.17426	-0.182017	0.85557	RO	NS			OTU_1885	0.0712298	-0.515691	1.17485	-0.438943	0.660703	RS	NS
OTU_3316	0.228632	0.370869	0.89825	0.412879	0.679695	RO	NS			OTU_1886	0.0826519	0.0261058	1.17634	0.0221924	0.982294	RS	NS
OTU_3317	0.129635	-0.489941	1.17266	-0.417802	0.676092	RO	NS			OTU_1889	0.0209811	-0.00710444	1.17641	-0.00603908	0.995182	RS	NS
OTU_3318	0.0865492	-0.304428	1.1737	-0.259375	0.795346	RO	NS			OTU_1890	0.0161258	-0.254266	1.17601	-0.216212	0.828823	RS	NS
OTU_3319	69.5169	-0.30801	0.515418	-0.597592	0.550112	RO	NS			OTU_1891	1.45147	1.35849	0.995034	1.36527	0.172168	RS	NS
OTU_3320	0.563752	-0.511136	0.575379	-0.888347	0.374354	RO	NS			OTU_1892	37.6669	-0.505494	0.211683	-2.38797	0.0169416	RS	NS
OTU_3321	0.314646	-1.03017	1.17152	-0.879347	0.379213	RO	NS			OTU_1893	16.3312	-0.104486	0.265391	-0.393705	0.693799	RS	NS
OTU_3322	0.220828	-0.459115	0.993819	-0.461971	0.644102	RO	NS			OTU_1894	7.99052	0.129064	0.130937	0.985702	0.32428	RS	NS
OTU_3323	0.184011	0.267826	0.822226	0.325733	0.744627	RO	NS			OTU_1895	0.0728344	-0.272554	1.17557	-0.231847	0.816656	RS	NS
OTU_3324	0.154604	0.0858548	0.971279	0.0883936	0.929564	RO	NS			OTU_1896	7.68509	-0.159331	0.480784	-0.331398	0.740344	RS	NS
OTU_3326	0.0619141	-0.0668722	1.17455	-0.0569343	0.954597	RO	NS			OTU_1897	1.96363	0.37153	0.287271	1.29331	0.195905	RS	NS
OTU_3327	0.0118957	-0.328811	1.17395	-0.28009	0.779408	RO	NS			OTU_1898	0.773526	1.00192	1.1731	0.854079	0.393061	RS	NS
OTU_3328	0.0614753	-0.557753	1.1732	-0.475411	0.634494	RO	NS			OTU_1899	11.7371	0.555362	0.444017	1.25077	0.211019	RS	NS
OTU_3330	0.0082592	-0.211622	1.17426	-0.180218	0.856981	RO	NS			OTU_1900	2.14012	0.0668691	0.311932	0.214371	0.830258	RS	NS
OTU_3331	0.0118957	-0.328811	1.17395	-0.28009	0.779408	RO	NS			OTU_1901	1.01112	0.0293226	0.275542	0.106418	0.915251	RS	NS
OTU_3333	0.0126371	-0.155972	1.17441	-0.132809	0.894345	RO	NS			OTU_1902	0.449298	-0.161499	0.794876	-0.203175	0.838998	RS	NS
OTU_3334	0.00785547	-0.209831	1.17425	-0.178693	0.858179	RO	NS			OTU_1903	0.604682	-0.871096	0.677498	-1.28575	0.198529	RS	NS
OTU_3337	0.0216828	-0.293329	1.17391	-0.249873	0.802686	RO	NS			OTU_1904	0.487526	-0.48808	1.01082	-0.482856	0.629198	RS	NS
OTU_3339	0.0198261	-0.365122	1.17381	-0.311057	0.755757	RO	NS			OTU_1905	0.116135	0.201397	1.1761	0.171241	0.864034	RS	NS
OTU_3340	0.0131754	-0.279048	1.17402	-0.237687	0.812124	RO	NS			OTU_1906	0.503133	0.481457	0.550779	0.874139	0.382042	RS	NS
OTU_3341	0.00531275	-0.173263	1.17439	-0.147534	0.88271	RO	NS			OTU_1907	1.92265	0.0151218	0.374765	0.0403501	0.967814	RS	NS
OTU_3342	0.0120394	-0.111354	1.17448	-0.0948117	0.924464	RO	NS			OTU_1908	0.17623	-0.109163	0.950668	-0.114827	0.908582	RS	NS
OTU_3345	7.32673	-0.0197174	0.458304	-0.0430225	0.965684	RO	NS			OTU_1909	0.505528	0.243908	0.399261	0.610899	0.541267	RS	NS
OTU_3346	0.126491	0.0287173	1.17438	0.0244531	0.980491	RO	NS			OTU_1911	0.415556	0.0676973	0.564833	0.119854	0.904599	RS	NS
OTU_3347	19.3893	-0.548767	0.392318	-1.39878	0.161879	RO	NS			OTU_1912	0.269134	-0.239519	0.935075	-0.256149	0.797836	RS	NS
OTU_3349	2.52183	-0.743568	0.819339	-0.907523	0.36413	RO	NS			OTU_1913	0.398372	-0.487502	0.444614	-1.09646	0.272878	RS	NS
OTU_3350	0.0212976	-0.163196	1.17419	-0.138987	0.889461	RO	NS			OTU_1914	0.199249	-0.0463439	0.541456	-0.0855911	0.931791	RS	NS
OTU_3351	12.0959	-1.40581	0.672434	-2.09063	0.0365612	RO	NS			OTU_1915	0.237747	-0.147988	0.584822	-0.253047	0.800232	RS	NS
OTU_3352	0.0198814	-0.266876	1.17411	-0.227301	0.82019	RO	NS			OTU_1916	0.117579	-0.0352263	0.978053	-0.0360167	0.971269	RS	NS
OTU_3353	0.0395818	-0.308575	1.17394	-0.262854	0.792663	RO	NS			OTU_1917	0.122977	-0.150329	1.17599	-0.127832	0.898282	RS	NS
OTU_3354	0.93204	-0.522702	0.378466	-1.38111	0.167246	RO	NS			OTU_1918	0.104342	-0.0279784	0.998163	-0.0280299	0.977638	RS	NS
OTU_3355	0.656466	-0.375775	0.963812	-0.389884	0.696622	RO	NS			OTU_1919	0.0428	-0.0903339	1.17646	-0.0767845	0.938795	RS	NS
OTU_3356	0.978122	0.09076	0.798563	0.113654	0.909512	RO	NS			OTU_1920	0.0692607	-0.304038	1.17548	-0.258649	0.795906	RS	NS
OTU_3357	1.11161	-1.04044	0.830419	-1.25291	0.21024	RO	NS			OTU_1921	0.0242574	-0.168816	1.17624	-0.143522	0.885878	RS	NS
OTU_3359	0.0795814	-0.355489	1.17316	-0.303017	0.761877	RO	NS			OTU_1922	0.016526	-0.0974313	1.17642	-0.0828202	0.933994	RS	NS
OTU_3361	2.10225	-1.50794	0.962178	-1.56721	0.117065	RO	NS			OTU_1924	0.0153285	0.04824	1.17636	0.0410078	0.96729	RS	NS
OTU_3362	0.184857	-0.5794	1.17314	-0.493886	0.621387	RO	NS			OTU_1925	0.036389	0.0643599	1.17635	0.0547115	0.956368	RS	NS
OTU_3363	0.996382	0.011353	0.517588	0.0219344	0.9825	RO	NS			OTU_1926	0.0161258	-0.254266	1.17601	-0.216212	0.828823	RS	NS
OTU_3364	0.0614851	-0.254723	1.1742	-0.216932	0.828261	RO	NS			OTU_1929	0.0181945	-0.00710444	1.17641	-0.00603908	0.995182	RS	NS
OTU_3370	0.0569412	-0.292236	1.17391	-0.248942	0.803405	RO	NS			OTU_1930	58.2374	0.0294727	0.0837009	0.352119	0.724749	RS	NS
OTU_3371	0.0578093	-0.377384	1.17335	-0.321629	0.747734	RO	NS			OTU_1931	18.6748	-0.0797619	0.350256	-0.227725	0.81986	RS	NS
OTU_3373	0.0725726	-0.347147	1.17356	-0.295808	0.767377	RO	NS			OTU_1932	12.5698	-0.559723	0.389164	-1.43827	0.150358	RS	NS
OTU_3376	0.00531275	-0.173263	1.17439	-0.147534	0.88271	RO	NS			OTU_1933	9.03652	-0.348613	0.326545	-1.06758	0.285711	RS	NS
OTU_3377	0.00531275	-0.173263	1.17439	-0.147534	0.88271	RO	NS			OTU_1934	19.2767	-0.0420262	0.143273	-0.293328	0.769271	RS	NS
OTU_3378	332.544	-0.660846	0.213356	-3.09739	0.00195234	RO	Depleted			OTU_1935	4.299	0.0789898	0.293619	0.269021	0.787914	RS	NS
OTU_3379	200.279	-0.588809	0.423648	-1.38985	0.164573	RO	NS			OTU_1936	2.7648	-0.598429	0.284603	-2.10268	0.0354936	RS	NS
OTU_3380	12.6544	-5.85334	1.03389	-5.66145	1.50099e-08	RO	Depleted			OTU_1937	3.69878	-0.306439	0.441301	-0.6944	0.487432	RS	NS
OTU_3381	0.00510015	-0.22104	1.17427	-0.188237	0.850691	RO	NS			OTU_1938	9.40479	-0.495874	0.412403	-1.2024	0.229208	RS	NS
OTU_3382	0.261218	-0.206543	0.889031	-0.232324	0.816286	RO	NS			OTU_1939	5.89689	0.0579884	0.208814	0.277703	0.781241	RS	NS
OTU_3385	0.35103	-0.258329	0.606519	-0.425921	0.670166	RO	NS			OTU_1940	4.81098	-0.700748	0.323765	-2.16437	0.0304357	RS	NS
OTU_3386	3.62517	0.210866	0.42253	0.499056	0.61774	RO	NS			OTU_1941	5.62632	0.351983	0.349046	1.00841	0.313257	RS	NS
OTU_3388	3.969	0.0444348	0.599266	0.0741486	0.940892	RO	NS			OTU_1942	0.865522	-0.0339177	0.338961	-0.100064	0.920294	RS	NS
OTU_3389	0.0991307	-0.670985	1.17292	-0.572063	0.56728	RO	NS			OTU_1943	1.4509	-0.147325	0.284832	-0.517233	0.604994	RS	NS
OTU_3390	0.383119	-1.01256	1.1717	-0.86418	0.387489	RO	NS			OTU_1944	0.92885	-0.0841493	0.235139	-0.357871	0.72044	RS	NS
OTU_3391	0.70903	-0.847466	0.773142	-1.09613	0.273021	RO	NS			OTU_1945	0.173179	-0.359066	1.17455	-0.305705	0.75983	RS	NS
OTU_3392	0.057764	-0.347147	1.17356	-0.295808	0.767377	RO	NS			OTU_1946	0.454965	-0.0906125	0.433358	-0.209094	0.834375	RS	NS
OTU_3393	0.320722	-0.476408	1.06078	-0.449112	0.653351	RO	NS			OTU_1947	0.355282	-0.25688	0.46859	-0.548198	0.583556	RS	NS
OTU_3394	3.96053	-0.388334	0.842453	-0.460956	0.64483	RO	NS			OTU_1948	0.0690032	-0.401676	1.17505	-0.341837	0.732474	RS	NS
OTU_3395	0.0104204	-0.271624	1.17407	-0.231352	0.817041	RO	NS			OTU_1949	0.393217	0.0948594	0.85483	0.110969	0.911641	RS	NS
OTU_3396	0.0793046	-0.615187	1.17305	-0.524433	0.599978	RO	NS			OTU_1950	0.365066	0.413206	0.574774	0.718902	0.472201	RS	NS
OTU_3397	0.0486094	-0.443797	1.17341	-0.378211	0.705274	RO	NS			OTU_1952	0.137636	0.0266338	1.11238	0.0239431	0.980898	RS	NS
OTU_3398	0.959698	0.263021	1.0873	0.241903	0.808855	RO	NS			OTU_1953	0.231336	-0.0657458	0.698236	-0.0941599	0.924982	RS	NS
OTU_3401	0.0614851	-0.254723	1.1742	-0.216932	0.828261	RO	NS			OTU_1954	0.157412	-0.312903	1.09117	-0.286759	0.774297	RS	NS
OTU_3404	2265.91	0.437843	0.179551	2.43854	0.0147466	RO	NS			OTU_1955	0.089206	0.170983	1.01976	0.16767	0.866843	RS	NS
OTU_3405	0.278829	-0.462366	1.06098	-0.435793	0.662987	RO	NS			OTU_1956	0.0839912	0.132088	1.17543	0.112374	0.910527	RS	NS
OTU_3408	0.11623	-0.392238	1.17365	-0.334204	0.738226	RO	NS			OTU_1957	1.41031	0.145814	0.285741	0.510302	0.60984	RS	NS
OTU_3414	255.954	-0.486784	0.223188	-2.18105	0.0291799	RO	NS			OTU_1958	0.117965	-0.210307	0.990173	-0.212394	0.8318	RS	NS
OTU_3415	295.935	-0.592971	0.469603	-1.26271	0.206695	RO	NS			OTU_1960	0.0191921	-0.0903339	1.17646	-0.0767845	0.938795	RS	NS
OTU_3416	292.818	-0.172534	0.168604	-1.02331	0.306163	RO	NS			OTU_1962	0.0544814	-0.0212789	1.17636	-0.0180888	0.985568	RS	NS
OTU_3417	6.63246	-0.00203194	0.571064	-0.00355817	0.997161	RO	NS			OTU_1963	0.0960709	-0.115257	1.14947	-0.100269	0.92013	RS	NS
OTU_3418	9.88553	-0.365464	0.519753	-0.703151	0.481962	RO	NS			OTU_1964	0.0781436	-0.181776	1.176	-0.154572	0.877159	RS	NS
OTU_3419	10.5713	-0.969121	0.518561	-1.86886	0.0616417	RO	NS			OTU_1965	0.0178202	-0.00710444	1.17641	-0.00603908	0.995182	RS	NS
OTU_3420	0.672716	0.597873	0.470886	1.26968	0.2042	RO	NS			OTU_1968	0.0425527	-0.0544853	1.17643	-0.0463141	0.96306	RS	NS
OTU_3421	0.0213754	-0.145232	1.17434	-0.123671	0.901576	RO	NS			OTU_1969	0.0228597	-0.0903339	1.17646	-0.0767845	0.938795	RS	NS
OTU_3422	0.376525	0.085333	0.786807	0.108455	0.913635	RO	NS			OTU_1970	7.39564	0.0325509	0.16475	0.197578	0.843376	RS	NS
OTU_3425	0.296866	-0.0780865	0.937362	-0.0833045	0.933609	RO	NS			OTU_1971	2.34095	0.958508	0.488922	1.96045	0.0499429	RS	NS
OTU_3426	10.9943	0.0897647	0.377738	0.237637	0.812162	RO	NS			OTU_1972	4.54746	0.220542	0.554852	0.397479	0.691014	RS	NS
OTU_3427	0.367223	-0.747651	1.17102	-0.638462	0.523173	RO	NS			OTU_1973	2.55108	-1.02132	0.491767	-2.07684	0.0378165	RS	NS
OTU_3428	0.0481518	-0.0419755	1.17426	-0.0357463	0.971485	RO	NS			OTU_1974	2.42483	-1.39856	1.16988	-1.19547	0.231903	RS	NS
OTU_3430	0.0718678	-0.317194	1.17334	-0.270335	0.786903	RO	NS			OTU_1976	1.70132	0.0910729	0.423403	0.215097	0.829692	RS	NS
OTU_3433	0.0282098	-0.318348	1.17387	-0.271195	0.786241	RO	NS			OTU_1977	1.3186	0.197155	0.276396	0.713307	0.475656	RS	NS
OTU_3434	0.0471417	-0.347147	1.17356	-0.295808	0.767377	RO	NS			OTU_1978	1.55786	-0.318408	0.226446	-1.40611	0.159691	RS	NS
OTU_3437	0.0417377	-0.178546	1.17421	-0.152057	0.879142	RO	NS			OTU_1979	0.0952025	0.0111506	1.17636	0.00947894	0.992437	RS	NS
OTU_3438	0.0198261	-0.365122	1.17381	-0.311057	0.755757	RO	NS			OTU_1981	0.338108	-0.63206	1.06714	-0.592294	0.553654	RS	NS
OTU_3440	48.7235	0.483759	0.275984	1.75285	0.0796276	RO	NS			OTU_1982	1.56972	-0.403891	0.400343	-1.00886	0.313041	RS	NS
OTU_3441	63.1086	-0.733903	0.351129	-2.09012	0.0366068	RO	NS			OTU_1983	0.191207	-0.368731	1.17511	-0.313785	0.753684	RS	NS
OTU_3443	326.812	-0.518271	0.228796	-2.26521	0.0234997	RO	NS			OTU_1984	0.22093	-0.58386	1.1739	-0.497367	0.61893	RS	NS
OTU_3445	3.68939	0.238473	0.286162	0.833349	0.404648	RO	NS			OTU_1986	0.291281	0.0880008	0.562102	0.156557	0.875594	RS	NS
OTU_3446	14.033	-0.808607	0.499041	-1.62032	0.105164	RO	NS			OTU_1987	0.28967	-0.488252	1.08181	-0.451327	0.651754	RS	NS
OTU_3447	1.35462	0.454704	0.528585	0.860229	0.389663	RO	NS			OTU_1988	0.111134	0.182854	0.999826	0.182885	0.854888	RS	NS
OTU_3449	5.87359	-1.16086	0.798618	-1.45358	0.146062	RO	NS			OTU_1989	0.0555154	-0.0737141	1.17636	-0.0626628	0.950035	RS	NS
OTU_3450	4.55957	-0.196095	0.438462	-0.447233	0.654707	RO	NS			OTU_1990	0.268029	0.186445	1.05615	0.176532	0.859876	RS	NS
OTU_3451	0.0177601	-0.0505515	1.17457	-0.0430382	0.965671	RO	NS			OTU_1991	0.144542	-0.190342	1.17553	-0.161921	0.871368	RS	NS
OTU_3452	5.47253	-0.37987	0.589767	-0.644103	0.519509	RO	NS			OTU_1992	0.128804	0.106239	0.777237	0.136689	0.891277	RS	NS
OTU_3454	2.28277	-1.24277	1.04337	-1.19111	0.23361	RO	NS			OTU_1993	0.179656	0.374901	1.17585	0.318834	0.749853	RS	NS
OTU_3455	0.0966459	0.241743	1.17407	0.205901	0.836868	RO	NS			OTU_1994	0.0602085	0.252852	1.17611	0.214991	0.829775	RS	NS
OTU_3456	0.390403	-0.143214	0.7016	-0.204124	0.838256	RO	NS			OTU_1995	0.0830092	-0.140651	1.17607	-0.119594	0.904805	RS	NS
OTU_3460	0.0802776	-0.108428	1.16931	-0.0927281	0.92612	RO	NS			OTU_1996	0.124398	-0.20464	0.861934	-0.237419	0.812332	RS	NS
OTU_3461	0.0263508	-0.312158	1.17378	-0.265942	0.790284	RO	NS			OTU_1997	0.0755668	-0.364533	1.17533	-0.310153	0.756445	RS	NS
OTU_3462	0.12297	-0.266876	1.17411	-0.227301	0.82019	RO	NS			OTU_1998	0.0638459	0.0111506	1.17636	0.00947894	0.992437	RS	NS
OTU_3463	0.0754591	-0.195162	1.17423	-0.166204	0.867997	RO	NS			OTU_1999	0.017032	-0.0337081	1.17642	-0.0286532	0.977141	RS	NS
OTU_3465	0.0378394	-0.144975	1.17416	-0.123472	0.901734	RO	NS			OTU_2001	0.0462952	-0.121304	1.17624	-0.103128	0.917861	RS	NS
OTU_3467	0.0316897	-0.254723	1.1742	-0.216932	0.828261	RO	NS			OTU_2002	0.0169789	0.0590527	1.17635	0.0501998	0.959963	RS	NS
OTU_3469	0.0171621	-0.0551427	1.17457	-0.0469473	0.962555	RO	NS			OTU_2003	0.0372735	-0.00380345	1.17638	-0.00323319	0.99742	RS	NS
OTU_3470	0.372142	0.260019	0.784099	0.331615	0.74018	RO	NS			OTU_2004	0.0231476	-0.0974313	1.17642	-0.0828202	0.933994	RS	NS
OTU_3473	0.0309571	-0.155972	1.17441	-0.132809	0.894345	RO	NS			OTU_2006	0.0167992	-0.168816	1.17624	-0.143522	0.885878	RS	NS
OTU_3475	0.828602	-0.490093	0.710213	-0.690065	0.490153	RO	NS			OTU_2009	0.0204406	-0.0974313	1.17642	-0.0828202	0.933994	RS	NS
OTU_3476	0.255473	-0.00766909	0.985465	-0.0077822	0.993791	RO	NS			OTU_2010	0.0242574	-0.168816	1.17624	-0.143522	0.885878	RS	NS
OTU_3477	1.40169	0.0772618	0.494947	0.156101	0.875953	RO	NS			OTU_2011	0.0247386	-0.0903339	1.17646	-0.0767845	0.938795	RS	NS
OTU_3478	0.155173	-0.393322	0.668229	-0.588604	0.556127	RO	NS			OTU_2012	0.0317342	-0.0486587	1.17644	-0.0413611	0.967008	RS	NS
OTU_3479	16.7618	-0.740585	0.529319	-1.39913	0.161775	RO	NS			OTU_2013	0.0253707	-0.0903339	1.17646	-0.0767845	0.938795	RS	NS
OTU_3480	87.8741	-0.588097	0.266463	-2.20705	0.0273108	RO	NS			OTU_2014	15.688	-0.0322008	0.148734	-0.216499	0.828599	RS	NS
OTU_3481	0.00957072	-0.313617	1.17401	-0.267134	0.789366	RO	NS			OTU_2015	3.80815	0.491795	0.252979	1.94401	0.0518938	RS	NS
OTU_3482	0.772265	-1.04787	1.17183	-0.894223	0.371203	RO	NS			OTU_2017	32.2086	0.0371907	0.123772	0.300478	0.763812	RS	NS
OTU_3484	0.196899	-0.397658	1.17347	-0.338872	0.734706	RO	NS			OTU_2018	3.3681	-0.537553	0.469305	-1.14542	0.252033	RS	NS
OTU_3485	0.0333417	-0.293329	1.17391	-0.249873	0.802686	RO	NS			OTU_2019	5.57611	-0.129241	0.153175	-0.843747	0.398811	RS	NS
OTU_3486	0.239942	-0.822413	1.1718	-0.701836	0.482781	RO	NS			OTU_2020	0.656861	0.494327	0.633445	0.780379	0.435168	RS	NS
OTU_3487	7.72851	-0.328521	0.316299	-1.03864	0.298971	RO	NS			OTU_2021	3.91112	-0.791599	0.518889	-1.52557	0.127118	RS	NS
OTU_3489	0.0201798	-0.200194	1.17435	-0.170472	0.864639	RO	NS			OTU_2022	7.56066	-0.0699343	0.172036	-0.406509	0.684369	RS	NS
OTU_3491	2.46441	-1.30116	0.680812	-1.91119	0.05598	RO	NS			OTU_2023	1.34279	0.256878	0.268657	0.956157	0.338993	RS	NS
OTU_3492	0.0107799	-0.211622	1.17426	-0.180218	0.856981	RO	NS			OTU_2024	2.07948	-0.0950093	0.196365	-0.48384	0.6285	RS	NS
OTU_3494	7.99951	-0.385775	0.559346	-0.689689	0.49039	RO	NS			OTU_2025	0.703856	-0.584744	0.45365	-1.28898	0.197407	RS	NS
OTU_3496	0.0242393	-0.0424624	1.17449	-0.036154	0.97116	RO	NS			OTU_2026	0.576256	0.477183	0.866829	0.550493	0.581981	RS	NS
OTU_3497	2.73614	-0.187116	0.591029	-0.316593	0.751552	RO	NS			OTU_2027	1.01371	-0.0229742	0.691571	-0.0332203	0.973499	RS	NS
OTU_3498	0.313672	-0.477856	0.968473	-0.493412	0.621722	RO	NS			OTU_2028	0.660958	-0.702864	0.536039	-1.31122	0.189784	RS	NS
OTU_3506	0.0619141	-0.0668722	1.17455	-0.0569343	0.954597	RO	NS			OTU_2029	0.598639	0.451849	0.748852	0.603388	0.546251	RS	NS
OTU_3512	0.0236488	-0.200194	1.17435	-0.170472	0.864639	RO	NS			OTU_2032	0.207446	0.472457	1.07165	0.440868	0.659309	RS	NS
OTU_3518	24.4749	-1.04887	0.543182	-1.93097	0.0534866	RO	NS			OTU_2033	0.0734833	-0.224281	1.17593	-0.190726	0.84874	RS	NS
OTU_3519	0.0456465	-0.000468219	1.17451	-0.000398651	0.999682	RO	NS			OTU_2034	0.177738	0.0999776	0.780506	0.128093	0.898075	RS	NS
OTU_3520	0.0383012	-0.338968	1.17361	-0.288825	0.772715	RO	NS			OTU_2035	0.151565	-0.0404567	1.11156	-0.0363964	0.970966	RS	NS
OTU_3521	70.8837	-0.191502	0.282975	-0.676744	0.498569	RO	NS			OTU_2036	0.274183	-0.6636	0.74554	-0.890092	0.373416	RS	NS
OTU_3522	1.88842	-1.79202	1.07582	-1.66573	0.0957665	RO	NS			OTU_2037	0.357361	-0.491711	0.909827	-0.540444	0.588891	RS	NS
OTU_3523	1.33522	-0.0513152	0.722797	-0.0709953	0.943402	RO	NS			OTU_2038	0.038821	-0.0666175	1.1764	-0.0566282	0.954841	RS	NS
OTU_3524	0.28789	-0.437616	0.93324	-0.468921	0.639126	RO	NS			OTU_2039	0.139239	0.495505	1.17551	0.421523	0.673373	RS	NS
OTU_3525	0.0532522	-0.434652	1.17336	-0.370433	0.71106	RO	NS			OTU_2040	0.181756	-0.605194	1.08606	-0.557236	0.577366	RS	NS
OTU_3526	18.2273	0.129315	0.65903	0.19622	0.844438	RO	NS			OTU_2041	0.117822	-0.062995	0.980196	-0.0642677	0.948757	RS	NS
OTU_3527	0.0873478	-0.337802	1.17398	-0.28774	0.773546	RO	NS			OTU_2042	0.0196536	0.0286262	1.17638	0.0243342	0.980586	RS	NS
OTU_3529	0.0118957	-0.328811	1.17395	-0.28009	0.779408	RO	NS			OTU_2043	0.0383286	0.0643599	1.17635	0.0547115	0.956368	RS	NS
OTU_3530	0.108517	-0.292236	1.17391	-0.248942	0.803405	RO	NS			OTU_2045	0.0360808	-0.0245821	1.17639	-0.0208962	0.983328	RS	NS
OTU_3531	0.138935	-0.255167	0.800942	-0.318584	0.750042	RO	NS			OTU_2048	0.0158692	0.0286262	1.17638	0.0243342	0.980586	RS	NS
OTU_3534	0.062881	-0.378116	1.1735	-0.322213	0.747291	RO	NS			OTU_2050	306.758	-0.43003	0.27042	-1.59023	0.111782	RS	NS
OTU_3535	0.485868	-0.354532	0.948051	-0.373959	0.708435	RO	NS			OTU_2051	24.6311	0.105406	0.141216	0.746412	0.455418	RS	NS
OTU_3537	0.0160626	-0.211622	1.17426	-0.180218	0.856981	RO	NS			OTU_2052	2.89788	0.163059	0.406075	0.401549	0.688016	RS	NS
OTU_3540	0.081284	-0.364721	1.17369	-0.310746	0.755994	RO	NS			OTU_2053	0.908691	-0.711762	0.553786	-1.28527	0.198699	RS	NS
OTU_3543	0.0262374	-0.306568	1.17382	-0.261172	0.79396	RO	NS			OTU_2054	20.7938	-0.575814	0.476181	-1.20923	0.226573	RS	NS
OTU_3544	0.0134421	-0.195162	1.17423	-0.166204	0.867997	RO	NS			OTU_2055	4.7991	-0.19298	0.375229	-0.514298	0.607044	RS	NS
OTU_3546	0.0198814	-0.266876	1.17411	-0.227301	0.82019	RO	NS			OTU_2056	2.53957	-0.499976	0.541719	-0.922943	0.356037	RS	NS
OTU_3547	0.0117854	-0.266877	1.17411	-0.227301	0.82019	RO	NS			OTU_2057	6.88103	0.215689	0.288074	0.748725	0.454023	RS	NS
OTU_3548	0.00572071	-0.168806	1.17439	-0.143739	0.885707	RO	NS			OTU_2058	1.20593	-0.500898	0.441596	-1.13429	0.256673	RS	NS
OTU_3550	230.019	-0.648528	0.221652	-2.92588	0.00343486	RO	NS			OTU_2059	2.04448	0.145639	0.276722	0.526302	0.598679	RS	NS
OTU_3551	24.6415	-1.61016	0.614882	-2.61865	0.00882783	RO	NS			OTU_2060	2.18637	-0.563365	0.414777	-1.35824	0.174389	RS	NS
OTU_3552	1.09677	-0.225724	0.737858	-0.305919	0.759667	RO	NS			OTU_2061	9.7761	0.0149304	0.0863001	0.173006	0.862647	RS	NS
OTU_3553	0.0131713	-0.195162	1.17423	-0.166204	0.867997	RO	NS			OTU_2062	1.21636	0.466342	0.281063	1.65921	0.0970731	RS	NS
OTU_3554	0.0160626	-0.211622	1.17426	-0.180218	0.856981	RO	NS			OTU_2063	0.981793	-0.341644	0.356721	-0.957734	0.338197	RS	NS
OTU_3555	6.50802	-0.571173	0.578896	-0.98666	0.32381	RO	NS			OTU_2067	0.536172	-0.0162282	0.550681	-0.0294694	0.97649	RS	NS
OTU_3557	4.31267	-1.10947	0.772544	-1.43612	0.150968	RO	NS			OTU_2068	0.325022	0.0372181	0.610533	0.06096	0.951391	RS	NS
OTU_3560	0.496354	-0.64075	0.681293	-0.940492	0.346965	RO	NS			OTU_2069	0.340649	-0.312446	0.565004	-0.552998	0.580265	RS	NS
OTU_3561	0.579799	0.240679	0.859782	0.27993	0.779531	RO	NS			OTU_2070	1.38315	-0.259628	0.223634	-1.16095	0.245663	RS	NS
OTU_3562	0.711527	-0.755114	1.01563	-0.743493	0.457183	RO	NS			OTU_2071	23.5059	0.0991545	0.206887	0.47927	0.631747	RS	NS
OTU_3564	0.0989502	-0.33706	1.17387	-0.287135	0.774009	RO	NS			OTU_2072	0.109592	0.119268	0.984517	0.121143	0.903577	RS	NS
OTU_3570	0.00957072	-0.313617	1.17401	-0.267134	0.789366	RO	NS			OTU_2073	0.0655243	0.151164	1.17623	0.128515	0.897741	RS	NS
OTU_3572	0.0216323	-0.323761	1.17397	-0.275784	0.782714	RO	NS			OTU_2074	0.0849028	0.00849467	1.02175	0.00831387	0.993367	RS	NS
OTU_3573	0.163145	-0.184176	0.975853	-0.188733	0.850302	RO	NS			OTU_2076	0.0317342	-0.0486587	1.17644	-0.0413611	0.967008	RS	NS
OTU_3574	3.19935	0.418661	0.950777	0.440336	0.659694	RO	NS			OTU_2079	0.0247386	-0.0903339	1.17646	-0.0767845	0.938795	RS	NS
OTU_3575	0.185616	-0.461643	1.17355	-0.393374	0.694043	RO	NS			OTU_2082	4.24224	-0.262096	0.231385	-1.13273	0.257328	RS	NS
OTU_3576	0.21335	0.1386	0.620786	0.223266	0.823329	RO	NS			OTU_2084	0.600945	-0.149346	0.611467	-0.244242	0.807044	RS	NS
OTU_3577	4.65721	-0.00711142	0.343168	-0.0207228	0.983467	RO	NS			OTU_2085	0.255772	-0.866208	1.17281	-0.738578	0.460163	RS	NS
OTU_3578	0.21955	0.0495416	1.15122	0.043034	0.965674	RO	NS			OTU_2086	0.813947	0.0715582	0.327205	0.218695	0.826887	RS	NS
OTU_3580	10.4839	-0.919389	0.617829	-1.4881	0.136726	RO	NS			OTU_2088	0.341242	-0.0742156	0.504328	-0.147157	0.883008	RS	NS
OTU_3581	0.166572	-0.394988	1.17354	-0.336579	0.736434	RO	NS			OTU_2090	0.490139	-0.533201	0.488352	-1.09184	0.274905	RS	NS
OTU_3582	7.03601	-0.188928	0.705044	-0.267966	0.788725	RO	NS			OTU_2091	0.0807338	-0.058412	1.17625	-0.0496595	0.960394	RS	NS
OTU_3583	0.00998945	-0.155972	1.17441	-0.132809	0.894345	RO	NS			OTU_2093	0.137778	0.0387317	0.96419	0.0401702	0.967957	RS	NS
OTU_3584	0.0166709	-0.266876	1.17411	-0.227301	0.82019	RO	NS			OTU_2095	0.0786439	-0.0838057	1.17616	-0.0712538	0.943196	RS	NS
OTU_3585	7.82301	-0.655824	0.623566	-1.05173	0.292922	RO	NS			OTU_2096	0.0782875	-0.170817	1.17583	-0.145274	0.884494	RS	NS
OTU_3586	0.0407745	-0.155972	1.17441	-0.132809	0.894345	RO	NS			OTU_2097	0.107929	-0.0655086	1.13002	-0.0579711	0.953772	RS	NS
OTU_3587	0.0153688	-0.350103	1.17386	-0.298248	0.765514	RO	NS			OTU_2098	0.094949	0.0468863	1.17633	0.0398581	0.968206	RS	NS
OTU_3588	0.286307	-0.67604	1.00565	-0.672244	0.501428	RO	NS			OTU_2100	0.0402071	0.135057	1.17629	0.114815	0.908591	RS	NS
OTU_3592	0.0126131	-0.211622	1.17426	-0.180218	0.856981	RO	NS			OTU_2101	0.0399359	-0.0666175	1.1764	-0.0566282	0.954841	RS	NS
OTU_3593	0.0865072	-0.151304	1.17433	-0.128843	0.897482	RO	NS			OTU_2104	0.0215152	-0.0486587	1.17644	-0.0413611	0.967008	RS	NS
OTU_3594	0.105869	-0.687945	1.17289	-0.586541	0.557512	RO	NS			OTU_2105	0.0200841	0.0783834	1.17634	0.0666334	0.946874	RS	NS
OTU_3597	0.0784854	-0.144975	1.17416	-0.123472	0.901734	RO	NS			OTU_2107	0.0389503	-0.203132	1.17608	-0.17272	0.862872	RS	NS
OTU_3598	0.0317119	-0.162025	1.17418	-0.13799	0.890249	RO	NS			OTU_2108	0.0218063	-0.135657	1.17639	-0.115316	0.908195	RS	NS
OTU_3599	0.0544973	-0.211622	1.17426	-0.180218	0.856981	RO	NS			OTU_2114	0.0349912	-0.0129305	1.1764	-0.0109915	0.99123	RS	NS
OTU_3602	0.960429	-1.05827	0.637956	-1.65884	0.0971472	RO	NS			OTU_2116	0.0184129	-0.0903339	1.17646	-0.0767845	0.938795	RS	NS
OTU_3603	2.54277	-6.73891	1.15333	-5.84302	5.12627e-09	RO	Depleted			OTU_2117	0.015985	-0.0903339	1.17646	-0.0767845	0.938795	RS	NS
OTU_3604	0.113344	-0.362408	1.00269	-0.361435	0.717774	RO	NS			OTU_2118	0.0354044	-0.233006	1.17608	-0.198121	0.842951	RS	NS
OTU_3605	3.5663	0.411436	0.675469	0.609111	0.542451	RO	NS			OTU_2119	7.49663	-0.060746	0.122774	-0.494781	0.620755	RS	NS
OTU_3606	0.0266987	-0.323761	1.17397	-0.275784	0.782714	RO	NS			OTU_2120	8.89371	-1.10923	0.391969	-2.82989	0.0046564	RS	NS
OTU_3607	1.99892	0.280803	0.627662	0.447379	0.654602	RO	NS			OTU_2121	4.05524	0.188523	0.286323	0.658427	0.510264	RS	NS
OTU_3608	0.582722	-0.453399	0.627607	-0.722426	0.470033	RO	NS			OTU_2122	1.00918	0.89703	0.719002	1.2476	0.212176	RS	NS
OTU_3609	1.70145	-1.4286	0.871334	-1.63956	0.101098	RO	NS			OTU_2123	0.356637	-0.25405	0.611626	-0.415368	0.677873	RS	NS
OTU_3610	0.159486	-0.451884	1.01516	-0.445136	0.656221	RO	NS			OTU_2124	1.26952	0.120986	0.237367	0.5097	0.610262	RS	NS
OTU_3611	0.551266	-0.819401	1.17065	-0.699951	0.483958	RO	NS			OTU_2125	0.272565	0.388392	0.533136	0.728504	0.466305	RS	NS
OTU_3612	0.0220521	-0.254723	1.1742	-0.216932	0.828261	RO	NS			OTU_2126	0.184009	-0.757792	1.17328	-0.645872	0.518362	RS	NS
OTU_3613	0.0951536	-0.263317	1.15518	-0.227944	0.81969	RO	NS			OTU_2127	0.452312	0.13382	0.394956	0.338824	0.734743	RS	NS
OTU_3615	0.0432149	-0.0713182	1.17412	-0.0607419	0.951565	RO	NS			OTU_2128	0.333163	-0.149026	0.707303	-0.210696	0.833125	RS	NS
OTU_3616	0.0173237	-0.280095	1.17401	-0.23858	0.811431	RO	NS			OTU_2129	0.405408	-0.074346	0.565616	-0.131443	0.895425	RS	NS
OTU_3617	0.216721	-0.590838	1.17207	-0.504098	0.614192	RO	NS			OTU_2130	0.480558	-0.184914	0.798337	-0.231625	0.81683	RS	NS
OTU_3624	0.0396523	-0.471784	1.17346	-0.402047	0.68765	RO	NS			OTU_2131	0.40342	0.182194	0.535893	0.339983	0.733869	RS	NS
OTU_3625	0.307426	-0.306568	1.17382	-0.261172	0.79396	RO	NS			OTU_2132	0.254373	0.311642	0.643599	0.484218	0.628231	RS	NS
OTU_3626	0.0198261	-0.365122	1.17381	-0.311057	0.755757	RO	NS			OTU_2133	0.0617081	-0.273336	1.17576	-0.232475	0.816169	RS	NS
OTU_3629	11.3953	0.0292489	0.161838	0.18073	0.85658	RO	NS			OTU_2134	0.162377	0.0601726	0.764096	0.0787501	0.937231	RS	NS
OTU_3630	8.99286	0.0236477	0.248448	0.0951819	0.92417	RO	NS			OTU_2135	0.101326	-0.0200367	0.999923	-0.0200382	0.984013	RS	NS
OTU_3631	1.09397	-0.527591	0.477442	-1.10504	0.269144	RO	NS			OTU_2136	0.111355	0.0170707	0.875976	0.0194876	0.984452	RS	NS
OTU_3632	5.01679	0.189617	0.629556	0.301192	0.763268	RO	NS			OTU_2137	0.0786738	-0.0121549	1.17633	-0.0103329	0.991756	RS	NS
OTU_3633	0.0788627	0.0361112	1.17402	0.0307587	0.975462	RO	NS			OTU_2138	0.0761376	0.0235902	1.17631	0.0200545	0.984	RS	NS
OTU_3634	0.0770265	0.0328071	1.17393	0.0279463	0.977705	RO	NS			OTU_2139	0.0403303	-0.0666175	1.1764	-0.0566282	0.954841	RS	NS
OTU_3636	0.313422	-0.256362	0.772965	-0.33166	0.740146	RO	NS			OTU_2140	0.0794997	-0.0316803	1.17632	-0.0269317	0.978514	RS	NS
OTU_3637	1.2932	-1.31735	0.49303	-2.67194	0.00754149	RO	NS			OTU_2142	0.0340768	-0.288399	1.17583	-0.245274	0.806245	RS	NS
OTU_3641	1.26384	-0.0426533	0.655347	-0.065085	0.948106	RO	NS			OTU_2143	0.0231476	-0.0974313	1.17642	-0.0828202	0.933994	RS	NS
OTU_3642	0.0082592	-0.211622	1.17426	-0.180218	0.856981	RO	NS			OTU_2144	0.0153285	0.04824	1.17636	0.0410078	0.96729	RS	NS
OTU_3643	0.0387336	-0.320011	1.17373	-0.272645	0.785126	RO	NS			OTU_2147	0.0162066	-0.168816	1.17624	-0.143522	0.885878	RS	NS
OTU_3644	0.016713	-0.280095	1.17401	-0.23858	0.811431	RO	NS			OTU_2148	20.2215	0.0980256	0.18878	0.519258	0.603581	RS	NS
OTU_3645	0.018356	-0.0993	1.1744	-0.0845536	0.932616	RO	NS			OTU_2149	2.59283	-1.14247	0.496873	-2.29932	0.0214869	RS	NS
OTU_3646	0.0083239	-0.211622	1.17426	-0.180218	0.856981	RO	NS			OTU_2150	1.30955	-0.432643	0.358293	-1.20751	0.227235	RS	NS
OTU_3647	0.0315728	-0.435801	1.17357	-0.371346	0.71038	RO	NS			OTU_2151	1.38435	-0.192199	0.872664	-0.220244	0.825681	RS	NS
OTU_3650	0.0082592	-0.211622	1.17426	-0.180218	0.856981	RO	NS			OTU_2152	0.206983	0.0086328	1.17632	0.0073388	0.994145	RS	NS
OTU_3652	0.0157864	-0.352563	1.17386	-0.300346	0.763913	RO	NS			OTU_2154	0.66008	0.172499	0.49699	0.347088	0.728525	RS	NS
OTU_3653	0.0083239	-0.211622	1.17426	-0.180218	0.856981	RO	NS			OTU_2155	0.0904426	0.139071	1.17613	0.118244	0.905874	RS	NS
OTU_3655	0.257456	-0.786527	1.17253	-0.670793	0.502353	RO	NS			OTU_2156	0.139414	0.10058	1.1761	0.0855203	0.931848	RS	NS
OTU_3656	0.123738	-0.141042	0.886786	-0.159049	0.873631	RO	NS			OTU_2157	5.93872	0.120416	0.256413	0.469618	0.638628	RS	NS
OTU_3657	6.62571	0.192276	0.398424	0.482591	0.629386	RO	NS			OTU_2158	0.218875	0.0534696	0.84497	0.0632799	0.949544	RS	NS
OTU_3658	2.49345	0.28928	0.549691	0.52626	0.598707	RO	NS			OTU_2159	0.420741	-0.544356	0.530287	-1.02653	0.304641	RS	NS
OTU_3659	0.220808	-0.0996231	0.785323	-0.126856	0.899054	RO	NS			OTU_2160	0.420253	-0.428496	0.727148	-0.589283	0.555672	RS	NS
OTU_3662	1.90236	0.287813	0.580824	0.495525	0.62023	RO	NS			OTU_2161	0.163858	-0.160313	1.17591	-0.136331	0.89156	RS	NS
OTU_3663	0.0648464	-0.490059	1.1734	-0.41764	0.67621	RO	NS			OTU_2162	1.04831	-0.287672	0.47127	-0.610418	0.541585	RS	NS
OTU_3664	1.42671	0.0728311	0.352361	0.206694	0.836249	RO	NS			OTU_2163	0.135652	0.0837441	0.977149	0.0857025	0.931703	RS	NS
OTU_3665	1.28639	0.742782	0.913392	0.813213	0.416096	RO	NS			OTU_2164	0.332053	-0.331951	0.506135	-0.655855	0.511917	RS	NS
OTU_3667	0.0160626	-0.211622	1.17426	-0.180218	0.856981	RO	NS			OTU_2165	0.0432702	-0.121304	1.17624	-0.103128	0.917861	RS	NS
OTU_3669	0.00976529	-0.124227	1.17446	-0.105774	0.915762	RO	NS			OTU_2166	0.0442086	-0.312513	1.17572	-0.265807	0.790388	RS	NS
OTU_3670	0.0413938	-0.23606	1.17406	-0.201064	0.840649	RO	NS			OTU_2168	0.0999016	-0.537025	1.17467	-0.457169	0.647549	RS	NS
OTU_3671	0.614729	-0.284929	0.559447	-0.509304	0.610539	RO	NS			OTU_2169	0.0901141	-0.0628919	1.17611	-0.0534746	0.957354	RS	NS
OTU_3672	0.00830109	-0.211622	1.17426	-0.180218	0.856981	RO	NS			OTU_2170	0.0153285	0.04824	1.17636	0.0410078	0.96729	RS	NS
OTU_3674	0.226973	-0.358832	1.17373	-0.30572	0.759818	RO	NS			OTU_2171	0.0383841	-0.10453	1.17638	-0.088857	0.929196	RS	NS
OTU_3675	0.0619141	-0.0668722	1.17455	-0.0569343	0.954597	RO	NS			OTU_2172	0.113484	-0.08988	1.12202	-0.0801054	0.936153	RS	NS
OTU_3676	0.00998945	-0.155972	1.17441	-0.132809	0.894345	RO	NS			OTU_2173	0.0191921	-0.0903339	1.17646	-0.0767845	0.938795	RS	NS
OTU_3677	0.016713	-0.280095	1.17401	-0.23858	0.811431	RO	NS			OTU_2174	0.0333252	-0.197498	1.176	-0.16794	0.866631	RS	NS
OTU_3679	0.0154428	-0.282408	1.17413	-0.240525	0.809924	RO	NS			OTU_2175	0.0185879	-0.0337081	1.17642	-0.0286532	0.977141	RS	NS
OTU_3682	0.0490493	-0.155972	1.17441	-0.132809	0.894345	RO	NS			OTU_2176	0.0672576	-0.137084	1.17624	-0.116544	0.907222	RS	NS
OTU_3683	0.0469065	-0.332345	1.17372	-0.283155	0.777058	RO	NS			OTU_2177	0.0153285	0.04824	1.17636	0.0410078	0.96729	RS	NS
OTU_3684	0.0348316	-0.381957	1.17368	-0.325436	0.744851	RO	NS			OTU_2178	0.0153285	0.04824	1.17636	0.0410078	0.96729	RS	NS
OTU_3685	0.00785547	-0.209831	1.17425	-0.178693	0.858179	RO	NS			OTU_2179	0.0341237	-0.121304	1.17624	-0.103128	0.917861	RS	NS
OTU_3686	0.0134421	-0.195162	1.17423	-0.166204	0.867997	RO	NS			OTU_2180	0.0394351	-0.112378	1.17632	-0.0955331	0.923891	RS	NS
OTU_3688	0.0108414	-0.266877	1.17411	-0.227301	0.82019	RO	NS			OTU_2181	0.0190128	-0.0337081	1.17642	-0.0286532	0.977141	RS	NS
OTU_3689	6.36581	-1.02821	0.389553	-2.63945	0.00830415	RO	NS			OTU_2182	0.0368258	-0.10453	1.17638	-0.088857	0.929196	RS	NS
OTU_3690	0.0249779	-0.213262	1.17401	-0.181652	0.855856	RO	NS			OTU_2183	0.0218063	-0.135657	1.17639	-0.115316	0.908195	RS	NS
OTU_3691	1.99469	-0.27362	1.16783	-0.234299	0.814753	RO	NS			OTU_2188	39.261	0.236104	0.120042	1.96684	0.0492016	RS	NS
OTU_3692	0.772547	0.167959	0.383488	0.437977	0.661403	RO	NS			OTU_2189	22.7948	-0.0272313	0.117049	-0.232648	0.816034	RS	NS
OTU_3693	1.27545	0.0488017	0.268608	0.181684	0.855831	RO	NS			OTU_2190	2.24004	-0.0349567	0.282771	-0.123622	0.901615	RS	NS
OTU_3694	0.0582319	-0.266876	1.17411	-0.227301	0.82019	RO	NS			OTU_2191	3.75905	0.470725	0.231683	2.03176	0.0421776	RS	NS
OTU_3695	6.7734	-0.0189891	0.327833	-0.057923	0.95381	RO	NS			OTU_2192	1.77531	-0.464382	0.394464	-1.17725	0.239096	RS	NS
OTU_3696	0.0346822	-0.136348	1.17426	-0.116114	0.907562	RO	NS			OTU_2193	5.96159	0.111655	0.172949	0.645598	0.51854	RS	NS
OTU_3698	0.416352	-0.672672	0.838207	-0.802512	0.422257	RO	NS			OTU_2194	1.30027	0.197705	0.543938	0.36347	0.716254	RS	NS
OTU_3699	0.0144523	-0.280095	1.17401	-0.23858	0.811431	RO	NS			OTU_2195	3.69082	0.452162	0.28037	1.61273	0.106802	RS	NS
OTU_3701	0.0240787	-0.00248919	1.17458	-0.00211921	0.998309	RO	NS			OTU_2196	0.717769	-0.125585	0.806261	-0.155763	0.87622	RS	NS
OTU_3703	1.37126	-1.2456	0.974447	-1.27827	0.201156	RO	NS			OTU_2197	1.2859	0.161518	0.398788	0.405023	0.685461	RS	NS
OTU_3705	0.00976529	-0.124227	1.17446	-0.105774	0.915762	RO	NS			OTU_2198	1.02004	-0.603888	0.374117	-1.61417	0.106491	RS	NS
OTU_3707	0.346838	-0.893024	0.826546	-1.08043	0.279951	RO	NS			OTU_2199	0.31593	0.0990959	0.864989	0.114563	0.908791	RS	NS
OTU_3709	0.0647831	-0.321815	1.17385	-0.274155	0.783966	RO	NS			OTU_2200	0.0340639	0.0111506	1.17636	0.00947894	0.992437	RS	NS
OTU_3715	0.0356871	-0.455558	1.17351	-0.388203	0.697866	RO	NS			OTU_2201	8.73804	-0.00369211	0.0762035	-0.0484507	0.961357	RS	NS
OTU_3718	0.0291245	-0.211622	1.17426	-0.180218	0.856981	RO	NS			OTU_2202	0.29948	-0.391533	1.08079	-0.362266	0.717154	RS	NS
OTU_3719	0.00957072	-0.313617	1.17401	-0.267134	0.789366	RO	NS			OTU_2203	0.373036	0.180709	0.625768	0.28878	0.77275	RS	NS
OTU_3720	0.0153688	-0.350103	1.17386	-0.298248	0.765514	RO	NS			OTU_2204	0.249471	0.111052	0.649511	0.170978	0.864241	RS	NS
OTU_3722	0.00572071	-0.168806	1.17439	-0.143739	0.885707	RO	NS			OTU_2205	0.454828	0.100889	0.428852	0.235253	0.814012	RS	NS
OTU_3724	0.748555	-0.00426043	0.337965	-0.0126061	0.989942	RO	NS			OTU_2206	0.227916	-0.379485	0.705969	-0.537538	0.590896	RS	NS
OTU_3725	0.410968	0.290251	0.774459	0.374779	0.707825	RO	NS			OTU_2207	0.321248	0.0626924	0.579445	0.108194	0.913842	RS	NS
OTU_3726	0.471408	-0.286831	0.444979	-0.644595	0.51919	RO	NS			OTU_2209	0.2704	-0.758509	1.07936	-0.702741	0.482217	RS	NS
OTU_3727	4.58356	0.158159	0.369148	0.428443	0.668328	RO	NS			OTU_2212	0.140654	0.177469	0.860007	0.206357	0.836512	RS	NS
OTU_3728	2542.14	-0.241116	0.328858	-0.73319	0.463443	RO	NS			OTU_2213	0.013715	-0.0428319	1.17644	-0.0364079	0.970957	RS	NS
OTU_3729	0.679636	-0.16175	0.532865	-0.303549	0.761472	RO	NS			OTU_2214	0.260654	-0.144271	0.764831	-0.188631	0.850382	RS	NS
OTU_3730	9.9259	0.264768	0.397866	0.66547	0.50575	RO	NS			OTU_2215	0.1732	-0.453401	0.861533	-0.526272	0.598699	RS	NS
OTU_3731	1.4056	-0.972036	0.513832	-1.89174	0.0585257	RO	NS			OTU_2216	0.0676175	-0.0337081	1.17642	-0.0286532	0.977141	RS	NS
OTU_3732	0.116159	-0.162287	1.17382	-0.138255	0.890039	RO	NS			OTU_2217	0.159268	-0.0107346	0.86593	-0.0123966	0.990109	RS	NS
OTU_3733	0.0362061	-0.00620158	1.17444	-0.00528047	0.995787	RO	NS			OTU_2218	0.0472882	0.164235	1.17622	0.13963	0.888952	RS	NS
OTU_3734	0.0375927	-0.200194	1.17435	-0.170472	0.864639	RO	NS			OTU_2219	0.139311	-0.175677	0.969364	-0.181229	0.856188	RS	NS
OTU_3735	0.194449	-0.178546	1.17421	-0.152057	0.879142	RO	NS			OTU_2220	0.117098	-0.478256	1.12374	-0.425593	0.670405	RS	NS
OTU_3736	1.04855	-0.311307	1.08431	-0.287103	0.774034	RO	NS			OTU_2221	0.129507	-0.035238	0.967607	-0.0364176	0.970949	RS	NS
OTU_3737	0.0103565	-0.155972	1.17441	-0.132809	0.894345	RO	NS			OTU_2222	0.146438	-0.236919	1.17552	-0.201543	0.840274	RS	NS
OTU_3738	0.0157864	-0.352563	1.17386	-0.300346	0.763913	RO	NS			OTU_2223	0.0674799	-0.0741376	1.17625	-0.063029	0.949743	RS	NS
OTU_3740	0.0237914	-0.39769	1.1737	-0.338835	0.734734	RO	NS			OTU_2225	0.0934606	-0.103284	1.01273	-0.101986	0.918768	RS	NS
OTU_3741	0.0120394	-0.111354	1.17448	-0.0948117	0.924464	RO	NS			OTU_2226	0.0384555	0.0886348	1.17633	0.0753489	0.939937	RS	NS
OTU_3743	0.11593	-0.21733	0.901262	-0.241139	0.809447	RO	NS			OTU_2227	0.0754136	-0.369461	1.17525	-0.314368	0.753241	RS	NS
[truncated: 2,821 more rows]

[truncated: 4 more sheets: Dataset S11, Dataset S12, Dataset S13, Dataset S14]
