# Supplementary material
Source: Research Square preprint supplement (doi:10.21203/rs.3.rs-8899582/v1)
Supplement: Supplementary file 5 [file f0bc94ecdc6f629037c313a6.docx]

**Table S1**: Do covariates (basal respiration) explain the plant diversity and legacy effects (plant and soil legacy) effects on fungal diversity across the compartments. The table includes dF (degree of freedom), F values and P- values.  Significant (p < 0.05) results are italicized and highlighted in bold.

|  |  | **Bulk soil** | | **Rhizosphere** | | **Root** | |
| --- | --- | --- | --- | --- | --- | --- | --- |
|  | **df** | **F-value** | **P-value** | **F-value** | **P-value** | **F-value** | **P-value** |
| **Observed OTU Richness** | | | | | | | |
| Intercept | 1, 64 | 16549.43 | 0.00 | 9422.913 | 0.00 | 1912.466 | 0 |
| Basal respiration | 1, 64 | 3.036 | 0.086 | 2.365 | 0.12902 | 2.182 | 0.1441 |
| logSR | 1,17 | 10.93 | 0.0042 | 16.629 | 0.0007 | 9.593 | 0.0061 |
| SH | 1, 64 | 37.005 | < 0.0001 | 32.001 | < 0.0001 | 39.313 | < 0.0001 |
| PH | 1, 64 | 0.179 | 0.67 | 3.421 | 0.069 | 0.189 | 0.6641 |
| SH:PH | 1, 64 | 0.0087 | 0.926 | 0.937 | 0.336 | 0.217 | 0.643 |
| logSR: SH | 1, 64 | 1.085 | 0.302 | 0.613 | 0.436 | 5.9501 | 0.017 |
| logSR:PH | 1, 64 | 0.0141 | 0.906 | 6.356 | 0.014 | 0.1691 | 0.681 |
| logSR:SH:PH | 1, 64 | 0.060 | 0.816 | 0.147 | 0.703 | 0.1971 | 0.657 |
| **Shannon** | | | | | | | |
| Intercept | 1, 64 | 377979.21 | 0 | 520369.83 | 0 | 18798.4715 | 0 |
| Basal respiration | 1, 64 | 0.287 | 0.594 | 0.799 | 0.374 | 3.181 | 0.079 |
| logSR | 1,17 | 0.762 | 0.395 | 0.577 | 0.457 | 7.361 | 0.015 |
| SH | 1, 64 | 0.918 | 0.342 | 0.142 | 0.707 | 0.086 | 0.7695 |
| PH | 1, 64 | 0.764 | 0.385 | 0.681 | 0.412 | 0.011 | 0.918 |
| SH:PH | 1, 64 | 0.50 | 0.481 | 1.001 | 0.321 | 0.396 | 0.531 |
| logSR: SH | 1, 64 | 0.605 | 0.439 | 1.224 | 0.273 | 0.262 | 0.610 |
| logSR:PH | 1, 64 | 0.001 | 0.967 | 7.177 | 0.0092 | 0.471 | 0.4945 |
| logSR:SH:PH | 1, 64 | 0.001 | 0.975 | 0.010 | 0.919 | 0.5827 | 0.448 |
| **Simpson** | | | | | | | |
| Intercept | 1, 64 | 383109.7 | 0 | 631899.3 | 0 | 12516.9 | 0 |
| Biomass | 1, 64 | 0.333 | 0.565 | 2.321 | 0.132 | 2.639 | 0.109 |
| logSR | 1,17 | 0.693 | 0.416 | 0.626 | 0.439 | 0.996 | 0.332 |
| SH | 1, 64 | 0.921 | 0.340 | 1.884 | 0.174 | 0.001 | 0.991 |
| PH | 1, 64 | 0.695 | 0.407 | 0.038 | 0.844 | 0.028 | 0.865 |
| SH:PH | 1, 64 | 0.445 | 0.506 | 5.190 | 0.026 | 1.536 | 0.219 |
| logSR: SH | 1, 64 | 0.527 | 0.470 | 2.606 | 0.111 | 0.023 | 0.877 |
| logSR:PH | 1, 64 | 0.005 | 0.942 | 2.225 | 0.140 | 0.198 | 0.657 |
| logSR:SH:PH | 1, 64 | 0.008 | 0.928 | 0.973 | 0.327 | 0.029 | 0.864 |

**Table S2**: Do covariates (microbial biomass: Cmic) explain the plant diversity and legacy effects (plant and soil legacy) effects on fungal diversity across the compartments. The table includes dF (degree of freedom), F values and P- values.  Significant (p < 0.05) results are italicized and highlighted in bold.

|  |  | **Bulk soil** | | **Rhizosphere** | | **Root** | |
| --- | --- | --- | --- | --- | --- | --- | --- |
|  | **df** | **F-value** | **P-value** | **F-value** | **P-value** | **F-value** | **P-value** |
| **Observed OTU Richness** | | | | | | | |
| Intercept | 1, 65 | 15421.63 | 0 | 9960.312 | 0 | 1833.054 | 0.077 |
| Cmic | 1, 65 | 1.525 | 0.221 | 1.682 | 0.199 | 3.3218 | 0.0173 |
| logSR | 1,17 | 6.405 | 0.021 | 15.910 | 0.009 | 7.897 | 0.012 |
| SH | 1, 65 | 31.007 | < 0.0001 | 37.328 | < 0.0001 | 37.090 | < 0.0001 |
| PH | 1, 65 | 0.002 | 0.961 | 3.315 | 0.073 | 0.189 | 0.664 |
| SH:PH | 1, 65 | 0.161 | 0.688 | 1.537 | 0.219 | 0.076 | 0.783 |
| logSR: SH | 1, 65 | 0.485 | 0.488 | 0.928 | 0.338 | 6.600 | 0.013 |
| logSR:PH | 1, 65 | 0.0621 | 0.804 | 6.489 | 0.013 | 0.237 | 0.627 |
| logSR:SH:PH | 1, 65 | 1.94E-05 | 0.996 | 0.192 | 0.662 | 0.196 | 0.658 |
| **Shannon** | | | | | | | |
| Intercept | 1, 65 | 385818.49 | 0 | 533948.972 | 0 | 17344.515 | 0 |
| Cmic | 1, 65 | 0.237 | 0.627 | 0.416 | 0.521 | 0.127 | 0.722 |
| logSR | 1,17 | 0.916 | 0.352 | 0.650 | 0.431 | 0.970 | 0.154 |
| SH | 1, 65 | 0.665 | 0.417 | 0.751 | 0.389 | 0.484 | 0.488 |
| PH | 1, 65 | 0.656 | 0.421 | 0.677 | 0.413 | 0.008 | 0.928 |
| SH:PH | 1, 65 | 0.625 | 0.432 | 1.461 | 0.231 | 0.936 | 0.337 |
| logSR: SH | 1, 65 | 0.643 | 0.425 | 1.518 | 0.222 | 0.100 | 0.752 |
| logSR:PH | 1, 65 | 0.004 | 0.947 | 7.247 | 0.009 | 0.620 | 0.434 |
| logSR:SH:PH | 1, 65 | 0.001 | 0.973 | 0.006 | 0.938 | 0.512 | 0.476 |
| **Simpson** | | | | | | | |
| Intercept | 1, 65 | 390924.15 | 0 | 646229.496 | 0 | 11108.04 | 0 |
| Cmic | 1, 65 | 0.189 | 0.664 | 0.851 | 0.359 | 0.864 | 0.356 |
| logSR | 1,17 | 0.829 | 0.375 | 0.353 | 0.560 | 1.289 | 0.272 |
| SH | 1, 65 | 0.7176 | 0.400 | 2.550 | 0.115 | 0.280 | 0.598 |
| PH | 1, 65 | 0.597 | 0.442 | 0.450 | 0.504 | 0.050 | 0.822 |
| SH:PH | 1, 65 | 0.578 | 0.449 | 6.855 | 0.011 | 2.345 | 0.130 |
| logSR: SH | 1, 65 | 0.577 | 0.449 | 2.223 | 0.141 | 7.49E-05 | 0.993 |
| logSR:PH | 1, 65 | 0.009 | 0.922 | 2.297 | 0.134 | 0.292 | 0.590 |
| logSR:SH:PH | 1, 65 | 0.007 | 0.930 | 1.198 | 0.277 | 0.021 | 0.883 |

Table S3: Do covariates (bacterial biomass) explain the plant diversity and legacy effects (plant and soil legacy) effects on fungal diversity across the compartments. The table includes dF (degree of freedom), F values and P- values l.  Significant (p < 0.05) results are italicized and highlighted in bold.

|  |  | **Bulk soil** | | **Rhizosphere** | | **Root** | |
| --- | --- | --- | --- | --- | --- | --- | --- |
|  | **df** | **F-value** | **P-value** | **F-value** | **P-value** | **F-value** | **P-value** |
| **Observed OTU Richness** | | | |  |  |  |  |
| Intercept | 1, 64 | 15107.40 | 0 | 9993.42 | 0 | 1919.23 | 0 |
| Bacterial biomass | 1, 64 | 10.498 | 0.001 | 0.962 | 0.33 | 3.167 | 0.079 |
| logSR | 1,17 | 6.755 | 0.018 | 15.77 | 0.000 | 8.622 | 0.009 |
| SH | 1, 64 | 29.486 | < 0.0001 | 36.459 | < 0.0001 | 39.020 | < 0.0001 |
| PH | 1, 64 | 0.002 | 0.956 | 2.802 | 0.098 | 0.067 | 0.796 |
| SH:PH | 1, 64 | 0.182 | 0.671 | 1.715 | 0.194 | 0.054 | 0.816 |
| logSR: SH | 1, 64 | 0.547 | 0.462 | 0.920 | 0.340 | 6.876 | 0.010 |
| logSR:PH | 1, 64 | 0.055 | 0.814 | 6.095 | 0.016 | 0.261 | 0.611 |
| logSR:SH:PH | 1, 64 | 0.0024 | 0.960 | 0.1784 | 0.674 | 0.163 | 0.687 |
| **Shannon** | | | | | | | |
| Intercept | 1, 64 | 393009.95 | 0 | 524338.91 | 0 | 17569.187 | 0 |
| Bacterial biomass | 1, 64 | 0.161 | 0.689 | 0.907 | 0.344 | 1.968 | 0.165 |
| logSR | 1,17 | 0.633 | 0.436 | 0.608 | 0.446 | 7.225 | 0.015 |
| SH | 1, 64 | 1.208 | 0.275 | 0.962 | 0.330 | 1.179 | 0.281 |
| PH | 1, 64 | 0.434 | 0.512 | 0.559 | 0.457 | 0.092 | 0.762 |
| SH:PH | 1, 64 | 0.378 | 0.540 | 1.476 | 0.228 | 1.050 | 0.309 |
| logSR: SH | 1, 64 | 0.928 | 0.338 | 1.629 | 0.206 | 0.061 | 0.804 |
| logSR:PH | 1, 64 | 0.005 | 0.943 | 7.172 | 0.009 | 0.736 | 0.393 |
| logSR:SH:PH | 1, 64 | 0.031 | 0.858 | 0.018 | 0.892 | 0.567 | 0.453 |
| **Simpson** | | | | | | | |
| Intercept | 1, 64 | 395944.45 | 0 | 630586.86 | 0 | 11883.79 | 0 |
| Bacterial biomass | 1, 64 | 0.118 | 0.731 | 0.324 | 0.571 | 2.924 | 0.092 |
| logSR | 1,17 | 0.578 | 0.457 | 0.543 | 0.471 | 1.438 | 0.246 |
| SH | 1, 64 | 1.236 | 0.270 | 1.830 | 0.180 | 0.837 | 0.363 |
| PH | 1, 64 | 0.401 | 0.528 | 0.507 | 0.478 | 0.084 | 0.772 |
| SH:PH | 1, 64 | 0.355 | 0.553 | 6.452 | 0.013 | 2.172 | 0.145 |
| logSR: SH | 1, 64 | 0.827 | 0.366 | 2.120 | 0.150 | 0.020 | 0.886 |
| logSR:PH | 1, 64 | 0.0007 | 0.977 | 2.44 | 0.123 | 0.279 | 0.599 |
| logSR:SH:PH | 1, 64 | 0.050 | 0.823 | 1.180 | 0.281 | 0.065 | 0.799 |

Table S4: Do covariates (fungal biomass) explain the plant diversity and legacy effects (plant and soil legacy) effects on fungal diversity across the compartments. The table includes dF (degree of freedom), F values and P- values l.  Significant (p < 0.05) results are italicized and highlighted in bold

|  |  | **Bulk soil** | | **Rhizosphere** | | **Root** | |
| --- | --- | --- | --- | --- | --- | --- | --- |
|  | **df** | **F-value** | **P-value** | **F-value** | **P-value** | **F-value** | **P-value** |
| **Observed OTU Richness** | | | | | | | |
| Intercept | 1, 64 | 15041.72 | 0 | 9177.70 | 0 | 2080.702 | 0 |
| Fungal biomass | 1, 64 | 0.025 | 0.873 | 0.222 | 0.638 | 3.139 | 0.081 |
| logSR | 1,17 | 8.474 | 0.009 | 14.697 | 0.001 | 9.113 | 0.007 |
| SH | 1, 64 | 37.675 | < 0.0001 | 33.251 | < 0.0001 | 40.928 | < 0.0001 |
| PH | 1, 64 | 0.002 | 0.964 | 3.773 | 0.056 | 0.214 | 0.644 |
| SH:PH | 1, 64 | 0.199 | 0.656 | 1.627 | 0.206 | 0.120 | 0.730 |
| logSR: SH | 1, 64 | 0.512 | 0.476 | 0.719 | 0.399 | 7.316 | 0.008 |
| logSR:PH | 1, 64 | 0.055 | 0.813 | 6.069 | 0.016 | 0.278 | 0.599 |
| logSR:SH:PH | 1, 64 | 0.004 | 0.947 | 0.2007 | 0.655 | 0.045 | 0.832 |
| **Shannon** | | | | | | | |
| Intercept | 1, 64 | 395340.89 | 0 | 513247.30 | 0 | 21580.66 | 0 |
| Fungal biomass | 1, 64 | 0.277 | 0.600 | 0.549 | 0.461 | 7.762 | 0.007 |
| logSR | 1,17 | 0.686 | 0.418 | 0.407 | 0.531 | 5.864 | 0.026 |
| SH | 1, 64 | 1.484 | 0.227 | 0.246 | 0.621 | 0.187 | 0.666 |
| PH | 1, 64 | 0.430 | 0.514 | 0.898 | 0.346 | < 0.0001 | 0.998 |
| SH:PH | 1, 64 | 0.341 | 0.560 | 1.349 | 0.249 | 0.759 | 0.386 |
| logSR: SH | 1, 64 | 1.028 | 0.314 | 1.522 | 0.221 | 0.029 | 0.864 |
| logSR:PH | 1, 64 | 0.004 | 0.949 | 7.100 | 0.009 | 0.767 | 0.384 |
| logSR:SH:PH | 1, 64 | 0.061 | 0.805 | 0.0301 | 0.862 | 0.947 | 0.334 |
| **Simpson** | | | | | | | |
| Intercept | 1, 64 | 398067.46 | 0 | 622428.10 | 0 | 14054.14 | 0 |
| Fungal biomass | 1, 64 | 0.260 | 0.611 | 1.115 | 0.294 | 4.871 | 0.030 |
| logSR | 1,17 | 0.633 | 0.437 | 0.432 | 0.519 | 0.651 | 0.430 |
| SH | 1, 64 | 1.454 | 0.232 | 1.045 | 0.310 | 0.043 | 0.834 |
| PH | 1, 64 | 0.386 | 0.536 | 0.312 | 0.577 | 0.0001 | 0.989 |
| SH:PH | 1, 64 | 0.320 | 0.573 | 6.179 | 0.015 | 1.812 | 0.182 |
| logSR: SH | 1, 64 | 0.909 | 0.343 | 1.684 | 0.198 | 0.027 | 0.867 |
| logSR:PH | 1, 64 | 0.0004 | 0.983 | 2.368 | 0.128 | 0.289 | 0.592 |
| logSR:SH:PH | 1, 64 | 0.083 | 0.773 | 0.950 | 0.333 | 0.164 | 0.686 |

Table S5: Do covariates (respiratory quotient) explain the plant diversity and legacy effects (plant and soil legacy) effects on fungal diversity across the compartments. The table includes dF (degree of freedom), F values and P- values l.  Significant (p < 0.05) results are italicized and highlighted in bold

|  |  | **Bulk soil** | | **Rhizosphere** | | **Root** | |
| --- | --- | --- | --- | --- | --- | --- | --- |
| **Observed OTU Richness** | df | F-value | P-value | F-value | P-value | F-value | P-value |
| Intercept | 1, 65 | 15477.21 | 0 | 9617.27 | 0 | 1862.92 | 0 |
| Respiratory Quotient | 1, 65 | 3.328 | 0.07 | 0.022 | 0.880 | 0.286 | 0.594 |
| logSR | 1,17 | 8.089 | 0.01 | 16.23 | 0.0008 | 9.05 | 0.007 |
| SH | 1, 65 | 37.026 | < 0.0001 | 35.95 | < 0.0001 | 41.63 | < 0.0001 |
| PH | 1, 65 | 0.0006 | 0.98 | 3.88 | 0.05 | 0.20 | 0.650 |
| SH:PH | 1, 65 | 0.256 | 0.61 | 1.22 | 0.27 | 0.13 | 0.710 |
| logSR: SH | 1, 65 | 0.394 | 0.53 | 0.72 | 0.39 | 6.23 | 0.015 |
| logSR:PH | 1, 65 | 0.042 | 0.83 | 6.636 | 0.012 | 0.206 | 0.650 |
| logSR:SH:PH | 1, 65 | 0.001 | 0.970 | 0.154 | 0.695 | 0.1745 | 0.677 |
| **Shannon** | | | | | | | |
| Intercept | 1, 65 | 385826.79 | 0 | 523652.99 | 0 | 18197.06 | 0 |
| Respiratory Quotient | 1, 65 | 0.009 | 0.921 | 0.539 | 0.465 | 2.388 | 0.127 |
| logSR | 1,17 | 0.768 | 0.393 | 0.589 | 0.453 | 7.582 | 0.013 |
| SH | 1, 65 | 1.0030 | 0.320 | 0.394 | 0.531 | 0.423 | 0.517 |
| PH | 1, 65 | 0.728 | 0.396 | 0.816 | 0.369 | 0.009 | 0.923 |
| SH:PH | 1, 65 | 0.597 | 0.442 | 1.201 | 0.277 | 0.549 | 0.4613 |
| logSR: SH | 1, 65 | 0.639 | 0.426 | 1.324 | 0.254 | 0.216 | 0.643 |
| logSR:PH | 1, 65 | 0.003 | 0.951 | 7.467 | 0.008 | 0.479 | 0.491 |
| logSR:SH:PH | 1, 65 | 0.001 | 0.970 | 0.013 | 0.907 | 0.634 | 0.428 |
| **Simpson** | | | | | | | |
| Intercept | 1, 65 | 391002.98 | 0 | 631238.56 | 0 | 11967.56 | 0 |
| Respiratory Quotient | 1, 65 | 0.016 | 0.898 | 0.199 | 0.656 | 3.326 | 0.072 |
| logSR | 1,17 | 0.698 | 0.414 | 0.545 | 0.470 | 1.297 | 0.270 |
| SH | 1, 65 | 1.026 | 0.314 | 1.201 | 0.277 | 0.122 | 0.727 |
| PH | 1, 65 | 0.655 | 0.421 | 0.193 | 0.661 | 0.036 | 0.848 |
| SH:PH | 1, 65 | 0.544 | 0.463 | 6.770 | 0.011 | 1.685 | 0.1981 |
| logSR: SH | 1, 65 | 0.567 | 0.453 | 2.006 | 0.161 | 0.022 | 0.881 |
| logSR:PH | 1, 65 | 0.008 | 0.928 | 2.276 | 0.136 | 0.198 | 0.657 |
| logSR:SH:PH | 1, 65 | 0.008 | 0.926 | 1.178 | 0.281 | 0.049 | 0.824 |

Table S6: Do covariates (soil fauna diversity) explain the plant diversity and legacy effects (plant and soil legacy) effects on fungal diversity across the compartments. The table includes dF (degree of freedom), F values and P- values l.  Significant (p < 0.05) results are italicized and highlighted in bold

|  |  | **Bulk soil** | | **Rhizosphere** | | **Root** | |
| --- | --- | --- | --- | --- | --- | --- | --- |
| **Observed OTU Richness** | df | F-value | P-value | F-value | P-value | F-value | P-value |
| Intercept | 1, 65 | 15455.42 | 0 | 0.001 | 0.96 | 1823.62 | 0 |
| Soil fauna diversity | 1, 65 | 1.636 | 0.205 | 9324.549 | 0 | 2.762 | 0.101 |
| logSR | 1,17 | 8.467 | 0.009 | 1.151 | 0.287 | 8.743 | 0.008 |
| SH | 1, 65 | 38.233 | < 0.0001 | 15.516 | 0.001 | 41.520 | < 0.0001 |
| PH | 1, 65 | 0.0001 | 0.990 | 34.770 | < 0.0001 | 0.353 | 0.554 |
| SH:PH | 1, 65 | 0.162 | 0.687 | 4.386 | 0.040 | 0.097 | 0.755 |
| logSR: SH | 1, 65 | 0.374 | 0.542 | 1.426 | 0.236 | 7.321 | 0.008 |
| logSR:PH | 1, 65 | 0.070 | 0.791 | 0.927 | 0.339 | 0.212 | 0.646 |
| logSR:SH:PH | 1, 65 | 15455.429 | 0 | 6.575 | 0.012 | 0.2667 | 0.607 |
| **Shannon** | | | | | | | |
| Intercept | 1, 65 | 390633.12 | 0 | 537987.85 | 0 | 18019.71 | 0 |
| Soil fauna diversity | 1, 65 | 1.124 | 0.292 | 0.181 | 0.671 | 0.224 | 0.637 |
| logSR | 1,17 | 0.861 | 0.366 | 0.524 | 0.478 | 6.934 | 0.017 |
| SH | 1, 65 | 0.858 | 0.357 | 0.222 | 0.638 | 0.182 | 0.670 |
| PH | 1, 65 | 0.620 | 0.433 | 0.979 | 0.326 | 1.19E-05 | 0.997 |
| SH:PH | 1, 65 | 0.613 | 0.436 | 1.373 | 0.245 | 0.908 | 0.344 |
| logSR: SH | 1, 65 | 0.801 | 0.374 | 1.500 | 0.225 | 0.172 | 0.679 |
| logSR:PH | 1, 65 | 0.002 | 0.964 | 7.221 | 0.009 | 0.643 | 0.425 |
| logSR:SH:PH | 1, 65 | 0.0001 | 0.991 | 0.003 | 0.954 | 0.565 | 0.454 |
| **Simpson** | | | | | | | |
| Intercept | 1, 65 | 395851.74 | 0 | 631469.29 | 0 | 11652.11 | 0 |
| Soil fauna diversity | 1, 65 | 1.139 | 0.289 | 0.048 | 0.827 | 0.360 | 0.550 |
| logSR | 1,17 | 0.791 | 0.386 | 0.513 | 0.483 | 1.067 | 0.315 |
| SH | 1, 65 | 0.872 | 0.353 | 1.298 | 0.258 | 0.015 | 0.901 |
| PH | 1, 65 | 0.548 | 0.461 | 0.205 | 0.651 | 0.007 | 0.929 |
| SH:PH | 1, 65 | 0.564 | 0.455 | 6.884 | 0.010 | 2.264 | 0.137 |
| logSR: SH | 1, 65 | 0.724 | 0.397 | 2.055 | 0.156 | 0.011 | 0.916 |
| logSR:PH | 1, 65 | 0.005 | 0.939 | 2.234 | 0.139 | 0.308 | 0.580 |
| logSR:SH:PH | 1, 65 | 0.001 | 0.965 | 1.168 | 0.283 | 0.034 | 0.853 |

Table S7: Do covariates (soil moisture) explain the plant diversity and legacy effects (plant and soil legacy) effects on fungal diversity across the compartments. The table includes dF (degree of freedom), F values and P- values l.  Significant (p < 0.05) results are italicized and highlighted in bold

|  |  | **Bulk soil** | | **Rhizosphere** | | **Root** | |
| --- | --- | --- | --- | --- | --- | --- | --- |
|  | **df** | **F-value** | **P-value** | **F-value** | **P-value** | **F-value** | **P-value** |
| **Observed OTU Richness** | | | | | | | |
| Intercept | 1, 65 | 15719.56 | 0 | 10305.65 | 0 | 2341.863 | 0 |
| Soil moisture | 1, 65 | 0.588 | 0.445 | 5.109 | 0.0271 | 2.3948 | 0.126 |
| logSR | 1,17 | 8.728 | 0.008 | 16.836 | 0.0007 | 11.244 | 0.003 |
| SH | 1, 65 | 41.291 | < 0.0001 | 41.376 | < 0.0001 | 44.793 | < 0.0001 |
| PH | 1, 65 | 0.021 | 0.883 | 3.359 | 0.071 | 0.081 | 0.776 |
| SH:PH | 1, 65 | 0.063 | 0.802 | 0.742 | 0.392 | 0.380 | 0.539 |
| logSR: SH | 1, 65 | 0.560 | 0.456 | 0.590 | 0.444 | 5.730 | 0.019 |
| logSR:PH | 1, 65 | 0.013 | 0.907 | 5.410 | 0.023 | 0.558 | 0.457 |
| logSR:SH:PH | 1, 65 | 0.004 | 0.949 | 0.294 | 0.589 | 0.297 | 0.587 |
| **Shannon** | | | | | | | |
| Intercept | 1, 65 | 389424.3 | 0 | 582482.2 | 0 | 20320.26 | 0 |
| Respiratory Quotient | 1, 65 | 0.618 | 0.434 | 10.150 | 0.002 | 3.696 | 0.058 |
| logSR | 1,17 | 0.841 | 0.371 | 0.441 | 0.515 | 7.406 | 0.014 |
| SH | 1, 65 | 1.212 | 0.274 | 0.934 | 0.337 | 0.399 | 0.529 |
| PH | 1, 65 | 0.850 | 0.359 | 0.502 | 0.480 | 0.014 | 0.903 |
| SH:PH | 1, 65 | 0.465 | 0.497 | 0.654 | 0.421 | 0.496 | 0.483 |
| logSR: SH | 1, 65 | 0.586 | 0.446 | 1.123 | 0.293 | 0.202 | 0.654 |
| logSR:PH | 1, 65 | 0.023 | 0.878 | 6.096 | 0.016 | 0.952 | 0.33 |
| logSR:SH:PH | 1, 65 | 3.98E-06 | 0.998 | 0.001 | 0.974 | 0.406 | 0.525 |
| **Simpson** | | | | | | | |
| Intercept | 1, 65 | 394566.4 | 0 | 638540.4 | 0 | 12930.79 | 0 |
| Respiratory Quotient | 1, 65 | 0.606 | 0.439 | 2.351 | 0.129 | 2.294 | 0.134 |
| logSR | 1,17 | 0.770 | 0.392 | 0.423 | 0.523 | 0.877 | 0.361 |
| SH | 1, 65 | 1.226 | 0.272 | 0.963 | 0.330 | 0.074 | 0.785 |
| PH | 1, 65 | 0.765 | 0.384 | 0.127 | 0.722 | 0.030 | 0.861 |
| SH:PH | 1, 65 | 0.424 | 0.516 | 6.228 | 0.015 | 1.737 | 0.192 |
| logSR: SH | 1, 65 | 0.520 | 0.473 | 2.171 | 0.145 | 0.013 | 0.909 |
| logSR:PH | 1, 65 | 0.033 | 0.854 | 1.988 | 0.163 | 0.458 | 0.500 |
| logSR:SH:PH | 1, 65 | 0.002 | 0.958 | 1.291 | 0.259 | 0.009 | 0.922 |
